# Supplementary material
Source: HighWire-hosted journal article supplement (https://www.jneurosci.org/content/41/12/2601)
Supplement: inline-supplementary-material-1 [file inline-supplementary-material-1.xlsx]

## Sheet: Figure 2-1
Figure 2-1: List of enriched transcripts at baseline in dHC vs PL cortex
DESeq2 results dHC vs PL cortex at Baseline
Selected statistical parameter: Benjamini & Hochberg False Discovery Rate (FDR) corrected p-value
Selected significance level: 0.10
Lower bound for expression: 10.0 baseMean read count
baseMean: Averaged read count across all biological replicates, in dHC and PL cortex
Enrichment	Gene ID	Chromosome	Location Start	Location End	Strand	GeneSymbol	BioType	dHC Untrained Avg	PL Untrained Avg	foldChange	log2FoldChange	baseMean	p-value	FDR
dHC enriched	ENSRNOG00000060879	7	25737979	25743537	-	1500009L16Rik	protein_coding	121.317	60.3059	0.497093	-1.00841	90.8114	1.22e-06	8.21e-06
dHC enriched	ENSRNOG00000052424	12	49419582	49561038	+	2900026A02Rik	protein_coding	2022.4	1335.77	0.66049	-0.598391	1679.09	4.24e-14	5.67e-13
dHC enriched	ENSRNOG00000052019	1	224886844	224887172	-	7SK	misc_RNA	50.9753	32.2606	0.632868	-0.660024	41.6179	0.0251847	0.0716944
dHC enriched	ENSRNOG00000005935	5	146933592	146945880	+	A3galt2	protein_coding	37.0107	14.4573	0.390624	-1.35615	25.734	0.00042749	0.0019639
dHC enriched	ENSRNOG00000060475	1	51525068	51525579	-	AABR07001555.1	lincRNA	19.4246	4.56586	0.235056	-2.08893	11.9952	0.00028372	0.00135141
dHC enriched	ENSRNOG00000060438	1	54439977	54441579	-	AABR07001634.1	lincRNA	26.0285	10.2829	0.395064	-1.33984	18.1557	0.00642852	0.0222925
dHC enriched	ENSRNOG00000052236	1	173275336	173284941	+	AABR07004992.1	protein_coding	22.5879	7.25409	0.32115	-1.63868	14.921	0.00106415	0.00449493
dHC enriched	ENSRNOG00000048397	1	198719162	198721476	-	AABR07005779.1	pseudogene	538.119	411.024	0.763816	-0.388704	474.571	6.09e-05	0.00032592
dHC enriched	ENSRNOG00000053728	1	250105678	250200076	-	AABR07006724.1	lincRNA	25.5992	12.3153	0.48108	-1.05565	18.9573	0.0203832	0.060043
dHC enriched	ENSRNOG00000061365	1	278476630	278480271	-	AABR07007055.1	lincRNA	30.1723	15.6124	0.517443	-0.950529	22.8924	0.0170994	0.0518014
dHC enriched	ENSRNOG00000050701	2	11885754	11886045	+	AABR07007385.1	pseudogene	106.498	74.3618	0.698248	-0.518189	90.4297	0.010306	0.0335726
dHC enriched	ENSRNOG00000041989	2	121153485	121153563	+	AABR07010030.1	miRNA	125.587	58.5828	0.46647	-1.10014	92.0851	3.59e-06	2.26e-05
dHC enriched	ENSRNOG00000048907	2	140734138	140734885	-	AABR07010563.1	pseudogene	24.9845	12.6403	0.505927	-0.982998	18.8124	0.0270317	0.0760958
dHC enriched	ENSRNOG00000055580	2	144173295	144178776	-	AABR07010620.1	lincRNA	68.2901	33.6468	0.492704	-1.02121	50.9685	0.00013802	0.00069455
dHC enriched	ENSRNOG00000061272	2	180878153	180883459	+	AABR07011996.1	lincRNA	112.934	74.7514	0.6619	-0.595314	93.8429	0.0021118	0.00833577
dHC enriched	ENSRNOG00000053168	2	230476320	230479594	+	AABR07013250.1	lincRNA	140.069	77.2575	0.551569	-0.858387	108.663	4.08e-06	2.56e-05
dHC enriched	ENSRNOG00000060973	2	259149018	259150479	-	AABR07013843.1	protein_coding	100.322	71.554	0.713245	-0.487531	85.9379	0.0215124	0.06281
dHC enriched	ENSRNOG00000024294	15	87389610	87390376	-	AABR07019083.1	pseudogene	209.493	55.2602	0.263781	-1.92259	132.377	2.44e-22	5.34e-21
dHC enriched	ENSRNOG00000037886	15	104448623	104449469	+	AABR07019412.1	pseudogene	88.4872	58.3773	0.659726	-0.600061	73.4322	0.00725494	0.0248081
dHC enriched	ENSRNOG00000057161	17	28825009	28829441	+	AABR07027407.1	lincRNA	312.777	221.746	0.708958	-0.496229	267.262	4.56e-05	0.00024818
dHC enriched	ENSRNOG00000021752	17	34224818	34226453	-	AABR07027496.1	pseudogene	20.729	9.47631	0.457152	-1.12925	15.1027	0.0222797	0.0647207
dHC enriched	ENSRNOG00000045884	10	94982505	94982605	-	AABR07030590.1	miRNA	221.505	164.036	0.740554	-0.433323	192.771	0.00850732	0.0284183
dHC enriched	ENSRNOG00000003670	10	104086002	104097812	-	AABR07030781.1	protein_coding	738.457	607.975	0.823304	-0.280503	673.216	0.001283	0.00532392
dHC enriched	ENSRNOG00000046001	10	105282095	105283854	-	AABR07030823.1	pseudogene	35.8774	7.72202	0.215233	-2.21603	21.7997	2.16e-06	1.41e-05
dHC enriched	ENSRNOG00000042376	18	30836331	30838734	+	AABR07031734.2	pseudogene	214.884	101.044	0.470226	-1.08857	157.964	4.68e-11	4.99e-10
dHC enriched	ENSRNOG00000022784	12	31757407	31760604	-	AABR07036035.1	pseudogene	114.849	61.8877	0.538861	-0.892014	88.3684	8.76e-05	0.00045586
dHC enriched	ENSRNOG00000054795	X	119194437	119200775	-	AABR07041096.2	lincRNA	231.254	86.2131	0.372807	-1.4235	158.734	4.57e-13	5.67e-12
dHC enriched	ENSRNOG00000058847	19	52051267	52061809	-	AABR07044001.4	lincRNA	25.0575	1.96771	0.0785278	-3.67065	13.5126	1.17e-08	1.01e-07
dHC enriched	ENSRNOG00000057601	19	56443632	56443869	+	AABR07044080.2	pseudogene	123.448	61.2084	0.495823	-1.0121	92.3282	6.23e-07	4.39e-06
dHC enriched	ENSRNOG00000019773	19	57662278	57699113	-	AABR07044089.1	protein_coding	286.154	172.011	0.601112	-0.734294	229.083	2.19e-08	1.82e-07
dHC enriched	ENSRNOG00000047928	5	86869973	86870386	-	AABR07048653.1	processed_pseudogene	61.0717	38.1461	0.624613	-0.678966	49.6089	0.011963	0.0381539
dHC enriched	ENSRNOG00000052899	5	142508486	142511865	-	AABR07049886.2	lincRNA	289.682	142.072	0.490442	-1.02784	215.877	1.58e-10	1.61e-09
dHC enriched	ENSRNOG00000047686	5	142643599	142646580	+	AABR07049887.1	pseudogene	457.034	196.506	0.42996	-1.21773	326.77	6.19e-16	9.26e-15
dHC enriched	ENSRNOG00000039025	3	29861224	29861621	-	AABR07051947.1	pseudogene	65.2742	36.4056	0.557733	-0.842353	50.8399	0.00180021	0.00723278
dHC enriched	ENSRNOG00000060472	3	30043787	30044573	+	AABR07051952.1	lincRNA	38.1641	5.34905	0.140159	-2.83486	21.7566	7.26e-09	6.36e-08
dHC enriched	ENSRNOG00000055241	3	110540717	110541170	+	AABR07053500.1	pseudogene	56.3576	36.3781	0.645486	-0.631542	46.3679	0.0266751	0.0752274
dHC enriched	ENSRNOG00000053339	4	180425804	180505916	-	AABR07062512.1	protein_coding	54.3264	31.0585	0.571701	-0.806667	42.6925	0.00537467	0.0190961
dHC enriched	ENSRNOG00000001804	4	180538389	180722358	-	AABR07062513.1	protein_coding	137.192	75.8204	0.552658	-0.85554	106.506	6.12e-06	3.75e-05
dHC enriched	ENSRNOG00000060463	6	9483594	9491667	+	AABR07062799.2	protein_coding	635.402	355.208	0.559028	-0.839008	495.305	2.07e-17	3.36e-16
dHC enriched	ENSRNOG00000043366	6	51662939	51663370	+	AABR07063829.1	pseudogene	96.3032	43.7281	0.454067	-1.13902	70.0157	8.41e-07	5.8e-06
dHC enriched	ENSRNOG00000051719	6	132116518	132183434	-	AABR07065498.1	protein_coding	243.9	151.535	0.621299	-0.68664	197.718	1.43e-06	9.56e-06
dHC enriched	ENSRNOG00000057235	9	41208046	41208893	+	AABR07067355.1	pseudogene	38.2271	17.9385	0.46926	-1.09154	28.0828	0.00354206	0.0132104
dHC enriched	ENSRNOG00000025970	9	84550603	84552964	+	AABR07068127.1	pseudogene	89.2712	62.902	0.704617	-0.505088	76.0866	0.019886	0.0588153
dHC enriched	ENSRNOG00000059673	12	24744579	24745035	-	AABR07072283.2	pseudogene	33.1127	18.0618	0.545465	-0.874442	25.5872	0.0237077	0.0682351
dHC enriched	ENSRNOG00000011861	16	32832061	32868702	-	Aadat	protein_coding	87.0159	55.7087	0.640213	-0.643376	71.3623	0.00602092	0.0211002
dHC enriched	ENSRNOG00000012584	1	162519521	162533893	-	Aamdc	protein_coding	38.6236	22.3438	0.578501	-0.789609	30.4837	0.0239257	0.0687244
dHC enriched	ENSRNOG00000039494	4	50152452	50200328	-	Aass	protein_coding	65.8481	44.6288	0.677754	-0.561167	55.2384	0.024423	0.0699319
dHC enriched	ENSRNOG00000002636	10	7093405	7200499	-	Abat	protein_coding	1540.16	1397.15	0.907146	-0.140594	1468.66	0.0313548	0.0862608
dHC enriched	ENSRNOG00000018126	5	69857771	69983015	-	Abca1	protein_coding	509.573	233.37	0.457972	-1.12667	371.471	8.59e-20	1.63e-18
dHC enriched	ENSRNOG00000004147	10	98319480	98390384	-	Abca8a	protein_coding	848.79	304.701	0.358983	-1.47801	576.745	4.8e-39	2.04e-37
dHC enriched	ENSRNOG00000059326	10	98412263	98469799	-	Abca9	protein_coding	24.8475	12.842	0.516834	-0.952228	18.8447	0.0356326	0.0960327
dHC enriched	ENSRNOG00000008012	4	22133521	22425515	-	Abcb4	protein_coding	442.529	315.977	0.714025	-0.485953	379.253	4.54e-06	2.82e-05
dHC enriched	ENSRNOG00000008012	4	22133521	22425515	-	Abcb4	protein_coding	442.529	315.977	0.714025	-0.485953	379.253	4.54e-06	2.82e-05
dHC enriched	ENSRNOG00000008012	4	22133521	22425515	-	Abcb4	protein_coding	442.529	315.977	0.714025	-0.485953	379.253	4.54e-06	2.82e-05
dHC enriched	ENSRNOG00000010064	15	103696557	103927592	-	Abcc4	protein_coding	103.418	76.7523	0.74216	-0.430198	90.0849	0.0296774	0.0823973
dHC enriched	ENSRNOG00000011929	2	225335718	225389120	-	Abcd3	protein_coding	1024.75	834.251	0.814104	-0.296716	929.5	6.73e-05	0.00035747
dHC enriched	ENSRNOG00000011964	6	108315035	108329464	-	Abcd4	protein_coding	69.8825	45.8232	0.655717	-0.608855	57.8529	0.0173998	0.0526062
dHC enriched	ENSRNOG00000001158	20	9743269	9840489	+	Abcg1	protein_coding	749.396	584.898	0.780493	-0.357543	667.147	5.72e-05	0.00030685
dHC enriched	ENSRNOG00000025689	6	26784058	26792808	-	Abhd1	protein_coding	217.877	153.755	0.705697	-0.50288	185.816	0.00045531	0.00208225
dHC enriched	ENSRNOG00000012683	1	146248503	146289465	-	Abhd17c	protein_coding	348.979	171.167	0.490479	-1.02774	260.073	1.12e-16	1.75e-15
dHC enriched	ENSRNOG00000029370	18	1892413	1946840	-	Abhd3	protein_coding	1145.65	671.75	0.586346	-0.770176	908.702	1.72e-21	3.59e-20
dHC enriched	ENSRNOG00000009244	15	32894938	32906850	+	Abhd4	protein_coding	855.836	542.698	0.634114	-0.657186	699.267	1.11e-14	1.54e-13
dHC enriched	ENSRNOG00000000221	8	130973201	131001458	+	Abhd5	protein_coding	193.242	149.818	0.775286	-0.3672	171.53	0.0126909	0.0401478
dHC enriched	ENSRNOG00000008167	15	18647844	18695133	-	Abhd6	protein_coding	719.457	592.419	0.823425	-0.280291	655.938	0.00079027	0.00343164
dHC enriched	ENSRNOG00000031325	17	89951752	90033328	+	Abi1	protein_coding	1680.63	874.831	0.520537	-0.941927	1277.73	1.7e-35	6.27e-34
dHC enriched	ENSRNOG00000004305	13	74154835	74333244	+	Abl2	protein_coding	367.68	279.814	0.761026	-0.393983	323.747	0.00052672	0.0023816
dHC enriched	ENSRNOG00000053040	7	11181386	11182279	+	AC094643.2	protein_coding	83.6656	54.4986	0.651387	-0.618414	69.0821	0.00617132	0.0215363
dHC enriched	ENSRNOG00000056454	1	266065344	266065402	-	AC096600.1	miRNA	141.409	59.1154	0.418044	-1.25827	100.262	1.47e-09	1.39e-08
dHC enriched	ENSRNOG00000053025	17	43679411	43689138	+	AC130391.3	protein_coding	106.425	28.7265	0.269923	-1.88938	67.5757	3.4e-14	4.58e-13
dHC enriched	ENSRNOG00000057641	14	82287906	82289927	-	AC133613.1	lincRNA	41.7619	9.22376	0.220866	-2.17876	25.4928	8.48e-08	6.61e-07
dHC enriched	ENSRNOG00000028417	10	86280892	86282693	-	AC142182.1	pseudogene	883.036	440.447	0.498788	-1.0035	661.742	2.12e-28	6.2e-27
dHC enriched	ENSRNOG00000000658	12	48127149	48238887	-	Acacb	protein_coding	75.4269	41.9386	0.556017	-0.846799	58.6828	0.00096483	0.00411586
dHC enriched	ENSRNOG00000010940	8	112594691	112676280	+	Acad11	protein_coding	124.773	68.952	0.552618	-0.855644	96.8626	2.14e-05	0.00012181
dHC enriched	ENSRNOG00000048164	8	28024123	28044876	-	Acad8	protein_coding	244.524	174.695	0.714429	-0.485138	209.61	0.0003875	0.00179503
dHC enriched	ENSRNOG00000012966	9	73833388	73871888	-	Acadl	protein_coding	244.268	141.595	0.579669	-0.786699	192.931	1.85e-07	1.39e-06
dHC enriched	ENSRNOG00000018114	10	56619303	56624526	-	Acadvl	protein_coding	456.846	303.019	0.663285	-0.592298	379.932	1.46e-08	1.23e-07
dHC enriched	ENSRNOG00000028992	1	140762758	140824441	+	Acan	protein_coding	71.9646	40.6307	0.564593	-0.824717	56.2977	0.00218066	0.00857244
dHC enriched	ENSRNOG00000001730	11	73078982	73191132	+	Acap2	protein_coding	577.522	467.469	0.809438	-0.305007	522.496	0.00138448	0.00570982
dHC enriched	ENSRNOG00000007862	8	58166990	58195884	-	Acat1	protein_coding	803.873	628.876	0.782308	-0.354192	716.374	0.000138	0.00069455
dHC enriched	ENSRNOG00000003108	10	91187593	91196572	+	Acbd4	protein_coding	1076.62	517.421	0.480597	-1.0571	797.021	1.73e-38	7.24e-37
dHC enriched	ENSRNOG00000007637	5	105230580	105279731	+	Acer2	protein_coding	98.3877	67.9848	0.690989	-0.533266	83.1862	0.0153413	0.0472802
dHC enriched	ENSRNOG00000050841	12	22472358	22478753	-	Ache	protein_coding	519.731	371.168	0.714155	-0.48569	445.45	1.7e-05	9.8e-05
dHC enriched	ENSRNOG00000019622	9	97355924	97367445	+	Ackr3	protein_coding	185.634	113.706	0.612529	-0.70715	149.67	1.07e-05	6.34e-05
dHC enriched	ENSRNOG00000007837	5	126347435	126395668	-	Acot11	protein_coding	74.2732	36.6836	0.4939	-1.01771	55.4784	7.39e-05	0.00038967
dHC enriched	ENSRNOG00000017494	2	199283909	199305799	+	Acp6	protein_coding	163.753	118.203	0.721842	-0.470246	140.978	0.00404141	0.0148404
dHC enriched	ENSRNOG00000011381	8	59184113	59239954	-	Acsbg1	protein_coding	2230.79	1304.32	0.584689	-0.77426	1767.55	1.2e-27	3.41e-26
dHC enriched	ENSRNOG00000014718	9	84569597	84593565	+	Acsl3	protein_coding	2259.45	1923.36	0.851253	-0.23234	2091.41	9.42e-05	0.00048681
dHC enriched	ENSRNOG00000016265	1	276240703	276290008	+	Acsl5	protein_coding	922.538	705.796	0.765059	-0.386357	814.167	1.18e-06	7.94e-06
dHC enriched	ENSRNOG00000026745	10	39655455	39719312	+	Acsl6	protein_coding	2937.24	2146.95	0.73094	-0.452174	2542.09	3.08e-14	4.16e-13
dHC enriched	ENSRNOG00000031211	1	189233141	189272172	+	Acsm5	protein_coding	27.4483	9.42541	0.343387	-1.54209	18.4369	0.00061233	0.00272218
dHC enriched	ENSRNOG00000018755	3	151032952	151075856	+	Acss2	protein_coding	800.58	621.804	0.776692	-0.364586	711.192	1.67e-05	9.68e-05
dHC enriched	ENSRNOG00000004448	7	49047013	49250957	-	Acss3	protein_coding	55.0736	26.7099	0.484985	-1.04399	40.8918	0.00041758	0.00192247
dHC enriched	ENSRNOG00000058039	1	252537615	252550394	-	Acta2	protein_coding	51.7596	24.6482	0.476206	-1.07034	38.2039	0.00064352	0.00285198
dHC enriched	ENSRNOG00000034254	12	13715843	13718841	+	Actb	protein_coding	14949.4	10406.6	0.696121	-0.522589	12678	1.85e-18	3.25e-17
dHC enriched	ENSRNOG00000004959	14	104340434	104375649	-	Actr2	protein_coding	3195.1	2459.3	0.769709	-0.377616	2827.2	1.79e-08	1.5e-07
dHC enriched	ENSRNOG00000003206	13	41695183	41738658	-	Actr3	protein_coding	3303	2002.56	0.606284	-0.721934	2652.78	5.4e-36	2.03e-34
dHC enriched	ENSRNOG00000031855	4	5644260	5672708	+	Actr3b	protein_coding	764.312	662.759	0.867131	-0.205678	713.536	0.0158405	0.0485577
dHC enriched	ENSRNOG00000005033	3	44432471	44522930	-	Acvr1	protein_coding	450.408	266.106	0.590812	-0.759229	358.257	7.66e-12	8.72e-11
dHC enriched	ENSRNOG00000017901	1	219233750	219237098	+	Acy3	protein_coding	60.5535	34.0501	0.562315	-0.830549	47.3018	0.00353106	0.0131745
dHC enriched	ENSRNOG00000042419	14	114891246	115052450	-	Acyp2	protein_coding	495.724	229.047	0.462045	-1.11389	362.386	8.09e-25	1.96e-23
dHC enriched	ENSRNOG00000002753	10	90731865	90746936	+	Adam11	protein_coding	2070.15	1625.39	0.785151	-0.348957	1847.77	4.95e-07	3.53e-06
dHC enriched	ENSRNOG00000020590	2	188661699	188672247	-	Adam15	protein_coding	546.909	431.973	0.789846	-0.340357	489.441	0.00085252	0.00368148
dHC enriched	ENSRNOG00000060694	6	43400528	43448280	-	Adam17	protein_coding	213.348	143.392	0.672103	-0.573246	178.37	0.00090436	0.00388196
dHC enriched	ENSRNOG00000042980	10	31146107	31240582	+	Adam19	protein_coding	514.445	293.277	0.570083	-0.810756	403.861	2.28e-09	2.11e-08
dHC enriched	ENSRNOG00000012424	9	70133969	70290117	+	Adam23	protein_coding	1226.41	1081.4	0.881761	-0.181541	1153.9	0.0232163	0.0671012
dHC enriched	ENSRNOG00000017231	16	71810377	71887926	+	Adam9	protein_coding	623.188	509.679	0.817858	-0.290078	566.434	0.00155204	0.00633786
dHC enriched	ENSRNOG00000008857	7	18409147	18439012	+	Adamts10	protein_coding	195.177	115.582	0.59219	-0.755868	155.379	6.42e-06	3.92e-05
dHC enriched	ENSRNOG00000027463	14	19866408	20070994	+	Adamts3	protein_coding	341.529	184.418	0.539979	-0.889026	262.974	1.39e-11	1.54e-10
dHC enriched	ENSRNOG00000023257	4	124660262	124858250	-	Adamts9	protein_coding	182.965	22.1401	0.121007	-3.04683	102.553	1.56e-38	6.53e-37
dHC enriched	ENSRNOG00000001227	20	11972381	12101047	+	Adarb1	protein_coding	2624.14	1727.47	0.6583	-0.603183	2175.81	5.57e-19	1.01e-17
dHC enriched	ENSRNOG00000030775	17	58104559	58301260	-	Adarb2	protein_coding	161.451	74.5712	0.461882	-1.1144	118.011	1.21e-09	1.15e-08
dHC enriched	ENSRNOG00000059479	14	87312203	87421659	+	Adcy1	protein_coding	6028.04	3455.46	0.573231	-0.802812	4741.75	5.75e-31	1.88e-29
dHC enriched	ENSRNOG00000049768	10	11392625	11512600	+	Adcy9	protein_coding	1110.83	671.764	0.604742	-0.725608	891.295	7.19e-21	1.44e-19
dHC enriched	ENSRNOG00000012098	4	85662892	85711696	+	Adcyap1r1	protein_coding	3072.39	1633.78	0.531762	-0.911148	2353.09	3.02e-52	1.99e-50
dHC enriched	ENSRNOG00000013039	14	81367468	81426496	-	Add1	protein_coding	4649	4225.71	0.908951	-0.137726	4437.35	0.0156953	0.0481736
dHC enriched	ENSRNOG00000015903	4	117743710	117882464	+	Add2	protein_coding	1896.86	1668.43	0.879577	-0.185118	1782.64	0.00420167	0.0153437
dHC enriched	ENSRNOG00000012820	1	273854248	273961982	+	Add3	protein_coding	1953.32	1325.41	0.678542	-0.55949	1639.37	1.4e-17	2.3e-16
dHC enriched	ENSRNOG00000012991	16	69095936	69132584	-	Adgra2	protein_coding	202.257	142.515	0.704623	-0.505077	172.386	0.0009339	0.0039945
dHC enriched	ENSRNOG00000004279	14	64686793	64786497	+	Adgra3	protein_coding	193.727	113.295	0.584818	-0.773941	153.511	1.96e-06	1.29e-05
dHC enriched	ENSRNOG00000014375	5	148193710	148231587	+	Adgrb2	protein_coding	6999.68	4811.43	0.687378	-0.540824	5905.55	8.91e-22	1.88e-20
dHC enriched	ENSRNOG00000014963	19	10423501	10460674	-	Adgrg1	protein_coding	2237.15	1668.27	0.745713	-0.423308	1952.71	2.67e-10	2.68e-09
dHC enriched	ENSRNOG00000011411	1	8593075	8751198	-	Adgrg6	protein_coding	109.482	41.361	0.377788	-1.40435	75.4215	2.82e-09	2.59e-08
dHC enriched	ENSRNOG00000007069	5	9403196	9429859	-	Adhfe1	protein_coding	417.173	340.443	0.816071	-0.293234	378.808	0.00814747	0.027424
dHC enriched	ENSRNOG00000008950	6	47940183	47947230	+	Adi1	protein_coding	169.867	120.112	0.707097	-0.500021	144.99	0.00220913	0.00866721
dHC enriched	ENSRNOG00000004143	13	51240911	51260228	+	Adipor1	protein_coding	709.558	602.32	0.848867	-0.23639	655.939	0.00587063	0.0206351
dHC enriched	ENSRNOG00000007990	4	151414684	151428894	-	Adipor2	protein_coding	275.726	217.779	0.789839	-0.34037	246.753	0.00658621	0.0227841
dHC enriched	ENSRNOG00000003442	13	51042248	51076852	-	Adora1	protein_coding	2044.38	1122.01	0.548826	-0.865578	1583.2	1.12e-24	2.7e-23
dHC enriched	ENSRNOG00000002922	10	48569555	48586365	+	Adora2b	protein_coding	67.2009	39.3247	0.585182	-0.773043	53.2628	0.00362991	0.013497
dHC enriched	ENSRNOG00000026178	8	64088913	64116832	+	Adpgk	protein_coding	405.016	244.712	0.604204	-0.726893	324.864	9.51e-10	9.09e-09
dHC enriched	ENSRNOG00000009299	14	80730307	80732010	-	Adra2c	protein_coding	162.691	97.3124	0.598144	-0.741434	130.001	1.46e-05	8.47e-05
dHC enriched	ENSRNOG00000013720	14	86101277	86111306	+	Aebp1	protein_coding	90.3938	37.4883	0.414722	-1.26978	63.941	1.77e-07	1.34e-06
dHC enriched	ENSRNOG00000060665	14	79919717	79988110	-	Afap1	protein_coding	483.085	401.671	0.83147	-0.266263	442.378	0.00629752	0.0218956
dHC enriched	ENSRNOG00000002232	14	7226586	7384876	-	Aff1	protein_coding	130.811	64.2863	0.491445	-1.0249	97.5485	2.66e-07	1.96e-06
dHC enriched	ENSRNOG00000000108	16	41222238	41234095	-	Aga	protein_coding	183.653	139.977	0.762185	-0.391786	161.815	0.0090984	0.0301643
dHC enriched	ENSRNOG00000025584	7	70364813	70377422	+	Agap2	protein_coding	17649.7	11819.5	0.669671	-0.578476	14734.6	2.26e-28	6.6e-27
dHC enriched	ENSRNOG00000012764	4	7202330	7253072	-	Agap3	protein_coding	3973.66	3360.64	0.845727	-0.241736	3667.15	4.09e-06	2.57e-05
dHC enriched	ENSRNOG00000008467	3	79613171	79646698	+	Agbl2	protein_coding	18.0249	4.83607	0.2683	-1.89808	11.4305	0.00235329	0.00916382
dHC enriched	ENSRNOG00000001404	12	22082057	22118220	+	Agfg2	protein_coding	577.52	322.023	0.557596	-0.842708	449.771	5.85e-17	9.32e-16
dHC enriched	ENSRNOG00000029304	2	25069620	25095106	-	Aggf1	protein_coding	395.009	310.792	0.786797	-0.345937	352.901	0.00130325	0.0053962
dHC enriched	ENSRNOG00000055915	5	144448792	144479306	-	Ago1	protein_coding	611.29	406.613	0.665172	-0.588201	508.951	5.14e-09	4.58e-08
dHC enriched	ENSRNOG00000001205	20	11114164	11144806	+	Agpat3	protein_coding	2914	2390.93	0.820498	-0.285429	2652.46	5.99e-06	3.67e-05
dHC enriched	ENSRNOG00000028623	16	75812997	75855745	-	Agpat5	protein_coding	405.354	283.26	0.698796	-0.517058	344.307	2.32e-06	1.51e-05
dHC enriched	ENSRNOG00000018445	19	57321640	57333433	-	Agt	protein_coding	1806.6	636.329	0.352225	-1.50543	1221.46	4.28e-63	3.72e-61
dHC enriched	ENSRNOG00000008619	5	164886813	164898420	-	Agtrap	protein_coding	282.208	145.021	0.51388	-0.960497	213.615	1.75e-12	2.09e-11
dHC enriched	ENSRNOG00000023541	13	98023430	98078946	-	Ahctf1	protein_coding	605.259	515.753	0.852119	-0.230873	560.506	0.0124947	0.0396365
dHC enriched	ENSRNOG00000018569	2	210438893	210473761	-	Ahcyl1	protein_coding	3339.34	2693.52	0.806604	-0.310067	3016.43	5.97e-08	4.74e-07
dHC enriched	ENSRNOG00000039300	4	57050214	57199900	+	Ahcyl2	protein_coding	2006.95	891.438	0.444175	-1.1708	1449.2	1.15e-65	1.11e-63
dHC enriched	ENSRNOG00000057569	1	225184939	225215015	+	Ahnak	protein_coding	274.874	208.894	0.759962	-0.396001	241.884	0.00504706	0.0180702
dHC enriched	ENSRNOG00000000853	20	5161333	5166448	-	Aif1	protein_coding	119.471	76.4077	0.639552	-0.644866	97.9391	0.00118596	0.00495351
dHC enriched	ENSRNOG00000009951	3	9237944	9262628	-	Aif1l	protein_coding	70.561	39.6889	0.562477	-0.830133	55.1249	0.001621	0.00659908
dHC enriched	ENSRNOG00000006067	X	135304066	135343087	-	Aifm1	protein_coding	295.664	239.295	0.809348	-0.305169	267.479	0.0110645	0.0356921
dHC enriched	ENSRNOG00000052506	1	247144491	247169693	-	Ak3	protein_coding	404.639	339.072	0.837963	-0.255041	371.855	0.0271612	0.0764354
dHC enriched	ENSRNOG00000045738	5	120250616	120305897	+	Ak4	protein_coding	247.138	200.579	0.811607	-0.301148	223.859	0.0218459	0.0636972
dHC enriched	ENSRNOG00000010964	1	137014272	137315272	+	Akap13	protein_coding	722.483	246.42	0.341074	-1.55185	484.451	1.41e-55	1.01e-53
dHC enriched	ENSRNOG00000026610	5	141415075	141430659	-	Akirin1	protein_coding	742.435	627.881	0.845705	-0.241774	685.158	0.00356316	0.0132741
dHC enriched	ENSRNOG00000008005	5	79184088	79222687	-	Akna	protein_coding	104.994	72.1747	0.687414	-0.540748	88.5846	0.00727374	0.0248675
dHC enriched	ENSRNOG00000017899	5	157801163	157813756	+	Akr7a3	protein_coding	31.1226	14.3339	0.460563	-1.11853	22.7282	0.00522163	0.0186139
dHC enriched	ENSRNOG00000020289	1	100845563	100851960	+	Akt1s1	protein_coding	419.16	358.475	0.855224	-0.225627	388.817	0.0266015	0.0750444
dHC enriched	ENSRNOG00000018677	1	84411726	84450162	+	Akt2	protein_coding	588.44	463.751	0.788102	-0.343546	526.095	0.00013662	0.0006887
dHC enriched	ENSRNOG00000021497	13	95081390	95348913	-	Akt3	protein_coding	1072.16	929.487	0.866928	-0.206016	1000.82	0.0092821	0.0306787
dHC enriched	ENSRNOG00000017619	1	238222521	238264330	+	Aldh1a1	protein_coding	321.501	140.512	0.43705	-1.19413	231.007	2.91e-18	5.04e-17
dHC enriched	ENSRNOG00000047023	4	123516788	123557501	-	Aldh1l1	protein_coding	249.612	154.343	0.618331	-0.693549	201.977	1.07e-06	7.29e-06
dHC enriched	ENSRNOG00000002342	10	47525493	47546345	-	Aldh3a2	protein_coding	545.731	457.992	0.839228	-0.252866	501.862	0.00923826	0.0305609
dHC enriched	ENSRNOG00000023538	17	42133076	42159413	+	Aldh5a1	protein_coding	1390.98	1198.97	0.861961	-0.214306	1294.98	0.00665399	0.0229724
dHC enriched	ENSRNOG00000011419	6	108146582	108167185	-	Aldh6a1	protein_coding	660.59	479.214	0.725433	-0.463085	569.902	5.19e-07	3.69e-06
dHC enriched	ENSRNOG00000014645	18	51619007	51651267	-	Aldh7a1	protein_coding	420.706	316.047	0.75123	-0.412674	368.377	0.00013688	0.00068961
dHC enriched	ENSRNOG00000004027	13	85580828	85597493	+	Aldh9a1	protein_coding	375.411	295.579	0.787348	-0.344927	335.495	0.00254354	0.00982237
dHC enriched	ENSRNOG00000011452	10	65586504	65590126	+	Aldoc	protein_coding	8084.42	6356.91	0.786317	-0.346817	7220.67	1.09e-07	8.44e-07
dHC enriched	ENSRNOG00000012972	4	148398892	148446303	-	Alox5	protein_coding	36.1712	21.1671	0.58519	-0.773022	28.6691	0.0269185	0.0758019
dHC enriched	ENSRNOG00000023280	9	65961346	66033871	-	Als2	protein_coding	647.94	553.848	0.854783	-0.22637	600.894	0.00877243	0.0291962
dHC enriched	ENSRNOG00000033921	8	119160731	119174830	+	Als2cl	protein_coding	67.2058	43.7713	0.651302	-0.618602	55.4885	0.020021	0.0591077
dHC enriched	ENSRNOG00000000585	20	45384000	45399694	-	Amd1	protein_coding	1774.91	1395.34	0.786146	-0.34713	1585.13	1.27e-07	9.69e-07
dHC enriched	ENSRNOG00000006460	10	13528413	13536899	-	Amdhd2	protein_coding	129.228	85.5139	0.661728	-0.595691	107.371	0.00190998	0.00762219
dHC enriched	ENSRNOG00000023603	9	41096835	41099189	+	Amer3	protein_coding	389.93	300.002	0.769373	-0.378245	344.966	0.0015254	0.00624835
dHC enriched	ENSRNOG00000055446	19	11473541	11508102	+	Amfr	protein_coding	1923.33	1657	0.861528	-0.21503	1790.16	0.00053964	0.00242871
dHC enriched	ENSRNOG00000007032	7	138704126	138707221	-	Amigo2	protein_coding	150.033	110.703	0.737853	-0.438594	130.368	0.0155769	0.0478923
dHC enriched	ENSRNOG00000016250	18	24540659	24563576	+	Ammecr1l	protein_coding	387.989	299.534	0.772018	-0.373294	343.761	0.00124074	0.00515726
dHC enriched	ENSRNOG00000007345	X	116751230	116792864	-	Amot	protein_coding	339.921	251.816	0.740807	-0.432829	295.868	0.0002286	0.00110664
dHC enriched	ENSRNOG00000008990	8	13042641	13109487	-	Amotl1	protein_coding	154.305	77.5042	0.502279	-0.99344	115.905	2.46e-08	2.03e-07
dHC enriched	ENSRNOG00000019240	2	210861625	210874304	-	Ampd2	protein_coding	1201.55	762.922	0.634949	-0.655288	982.236	8.45e-18	1.42e-16
dHC enriched	ENSRNOG00000018262	1	175586097	175630467	+	Ampd3	protein_coding	562.603	402.707	0.715792	-0.482389	482.655	3.9e-07	2.82e-06
dHC enriched	ENSRNOG00000016965	3	121147547	121226125	-	Anapc1	protein_coding	825.18	675.613	0.818746	-0.288511	750.396	0.00054642	0.00245647
dHC enriched	ENSRNOG00000018296	19	31815319	31867850	-	Anapc10	protein_coding	142.508	97.1577	0.681771	-0.55264	119.833	0.00225382	0.00882443
dHC enriched	ENSRNOG00000008459	8	111107358	111115774	+	Anapc13	protein_coding	126.681	91.2957	0.720674	-0.472581	108.988	0.0121958	0.0388027
dHC enriched	ENSRNOG00000005854	7	81342280	81592206	-	Angpt1	protein_coding	47.7441	28.3663	0.594132	-0.751144	38.0552	0.0218662	0.0637456
dHC enriched	ENSRNOG00000016678	3	12262822	12292663	+	Angptl2	protein_coding	17.4086	6.20854	0.356636	-1.48748	11.8086	0.0167315	0.0508718
dHC enriched	ENSRNOG00000053288	20	20105047	20480623	+	Ank3	protein_coding	3898.93	3449.63	0.884761	-0.17664	3674.28	0.00733438	0.0250549
dHC enriched	ENSRNOG00000015554	8	71035309	71055969	-	Ankdd1a	protein_coding	103.374	19.5067	0.1887	-2.40583	61.4405	2.16e-17	3.51e-16
dHC enriched	ENSRNOG00000001204	12	47558590	47588335	-	Ankrd13a	protein_coding	516.549	399.28	0.772976	-0.371504	457.915	0.00014116	0.00070932
dHC enriched	ENSRNOG00000019697	16	7818667	7928518	-	Ankrd28	protein_coding	798.918	682.103	0.853784	-0.228057	740.511	0.00652993	0.0226077
dHC enriched	ENSRNOG00000002935	10	82032656	82045935	+	Ankrd40	protein_coding	1157.66	974.019	0.841372	-0.249184	1065.84	0.00134807	0.00556839
dHC enriched	ENSRNOG00000013555	2	44096061	44196605	+	Ankrd55	protein_coding	84.3495	59.6734	0.707455	-0.499291	72.0114	0.0244676	0.0700238
dHC enriched	ENSRNOG00000014343	8	23337621	23390773	-	Anln	protein_coding	432.222	95.5484	0.221063	-2.17747	263.885	2.14e-51	1.38e-49
dHC enriched	ENSRNOG00000018113	17	66548818	66551947	+	Anlnl1	protein_coding	121.352	27.5733	0.227218	-2.13785	74.4625	6.37e-17	1.01e-15
dHC enriched	ENSRNOG00000020865	1	217754336	217902473	-	Ano1	protein_coding	37.9461	16.5267	0.435533	-1.19915	27.2364	0.00163294	0.0066384
dHC enriched	ENSRNOG00000004731	3	101840630	102151489	-	Ano3	protein_coding	2198.38	1447.08	0.658248	-0.603296	1822.73	6.15e-17	9.77e-16
dHC enriched	ENSRNOG00000006995	7	137142170	137335208	+	Ano6	protein_coding	274.032	117.777	0.429791	-1.21829	195.904	8.86e-16	1.31e-14
dHC enriched	ENSRNOG00000009266	5	62071346	62094633	+	Anp32b	protein_coding	448.588	364.572	0.81271	-0.299187	406.58	0.00405714	0.0148886
dHC enriched	ENSRNOG00000000081	14	13192347	13274978	+	Antxr2	protein_coding	21.3459	10.8371	0.507689	-0.977982	16.0915	0.0348202	0.0942011
dHC enriched	ENSRNOG00000010984	16	3867208	3912148	-	Anxa11	protein_coding	2011.55	1049.66	0.521818	-0.93838	1530.61	5.55e-34	1.98e-32
dHC enriched	ENSRNOG00000010362	8	75687100	75723594	+	Anxa2	protein_coding	75.0399	46.9313	0.625417	-0.677109	60.9856	0.0111774	0.0360003
dHC enriched	ENSRNOG00000002045	14	14364008	14426437	-	Anxa3	protein_coding	332.866	247.579	0.743778	-0.427055	290.222	0.0003713	0.00173025
dHC enriched	ENSRNOG00000010668	10	40320581	40375605	-	Anxa6	protein_coding	2123.43	1329.05	0.625899	-0.675999	1726.24	9.37e-26	2.4e-24
dHC enriched	ENSRNOG00000015354	9	64929694	65007884	+	Aox1	protein_coding	174.063	78.953	0.45359	-1.14054	126.508	5.05e-10	4.95e-09
dHC enriched	ENSRNOG00000025619	15	33759001	33766438	-	Ap1g2	protein_coding	77.6773	50.7003	0.652704	-0.6155	64.1888	0.00920619	0.0304805
dHC enriched	ENSRNOG00000038686	X	32329598	32355307	-	Ap1s2	protein_coding	184.406	122.691	0.665333	-0.587853	153.548	0.00040104	0.0018518
dHC enriched	ENSRNOG00000010624	2	24024791	24226224	+	Ap3b1	protein_coding	441.029	206.28	0.467725	-1.09627	323.655	8.13e-20	1.55e-18
dHC enriched	ENSRNOG00000011461	15	3436361	3454279	+	Ap3m1	protein_coding	449.136	298.904	0.665508	-0.587472	374.02	4.51e-08	3.62e-07
dHC enriched	ENSRNOG00000008022	7	31699885	31784192	-	Apaf1	protein_coding	292.951	207.571	0.708552	-0.497054	250.261	5.71e-05	0.00030685
dHC enriched	ENSRNOG00000033791	7	12258468	12275609	-	Apc2	protein_coding	2941.14	2611.02	0.887757	-0.171763	2776.08	0.0103153	0.0335964
dHC enriched	ENSRNOG00000043304	18	58270410	58301002	+	Apcdd1	protein_coding	356.647	148.851	0.417362	-1.26063	252.749	5.79e-22	1.24e-20
dHC enriched	ENSRNOG00000009663	15	27849979	27852082	+	Apex1	protein_coding	659.269	497.55	0.754699	-0.406026	578.409	1.12e-05	6.6e-05
dHC enriched	ENSRNOG00000023816	2	198006316	198009830	+	Aph1a	protein_coding	506.742	420.416	0.829645	-0.269434	463.579	0.0068491	0.0235562
dHC enriched	ENSRNOG00000009689	3	83310884	83335960	-	Api5	protein_coding	1028.3	835.689	0.812688	-0.299226	931.995	6.66e-05	0.00035407
dHC enriched	ENSRNOG00000017403	1	197999037	198003839	+	Apobr	protein_coding	35.6594	14.8861	0.417452	-1.26032	25.2727	0.00098792	0.00420719
dHC enriched	ENSRNOG00000018426	1	80606638	80609921	-	Apoc1	protein_coding	171.569	35.4285	0.206497	-2.27581	103.499	1.51e-24	3.61e-23
dHC enriched	ENSRNOG00000048273	11	72705129	72726301	+	Apod	protein_coding	1236.07	577.716	0.46738	-1.09733	906.896	6.29e-07	4.42e-06
dHC enriched	ENSRNOG00000018454	1	80612895	80617057	-	Apoe	protein_coding	26014.5	12623.4	0.485247	-1.04321	19318.9	1.05e-15	1.55e-14
dHC enriched	ENSRNOG00000004512	X	83678339	83750549	+	Apool	protein_coding	56.7075	34.9136	0.615678	-0.699751	45.8105	0.0119241	0.0380404
dHC enriched	ENSRNOG00000008174	7	26256459	26306126	+	Appl2	protein_coding	406.773	256.875	0.631494	-0.663158	331.824	3.53e-09	3.2e-08
dHC enriched	ENSRNOG00000016043	18	6765945	6782996	-	Aqp4	protein_coding	5167.15	2096.18	0.405673	-1.30161	3631.66	1.28e-74	1.49e-72
dHC enriched	ENSRNOG00000061883	8	77559624	77599781	-	Aqp9	protein_coding	54.6242	34.4143	0.630019	-0.666532	44.5193	0.0198849	0.0588153
dHC enriched	ENSRNOG00000005639	X	67656253	67829026	+	Ar	protein_coding	113.418	45.4238	0.400497	-1.32014	79.4211	2.08e-08	1.73e-07
dHC enriched	ENSRNOG00000019555	1	166478005	166525255	+	Arap1	protein_coding	287.747	198.979	0.691509	-0.532181	243.363	3.07e-05	0.00017077
dHC enriched	ENSRNOG00000043465	7	115907097	115910541	-	Arc	protein_coding	667.527	401.334	0.601225	-0.734023	534.431	1.63e-12	1.95e-11
dHC enriched	ENSRNOG00000004382	6	108635220	108796124	-	Arel1	protein_coding	2198.75	1842.78	0.838104	-0.254799	2020.77	2.95e-05	0.00016468
dHC enriched	ENSRNOG00000060229	10	45563547	45579029	-	Arf1	protein_coding	3394.03	3023.5	0.890827	-0.166783	3208.77	0.00267119	0.0102692
dHC enriched	ENSRNOG00000012623	16	2338333	2354909	+	Arf4	protein_coding	971.295	774.133	0.797011	-0.327328	872.714	2.23e-05	0.00012668
dHC enriched	ENSRNOG00000014429	3	80081647	80093658	+	Arfgap2	protein_coding	835.235	689.831	0.825913	-0.275939	762.533	0.00054737	0.00246007
dHC enriched	ENSRNOG00000013304	1	21525421	21537863	+	Arg1	protein_coding	178.076	16.0726	0.0902568	-3.46982	97.0742	6.84e-41	3.23e-39
dHC enriched	ENSRNOG00000008115	3	105281827	105298108	-	Arhgap11a	protein_coding	35.5699	20.8655	0.586606	-0.769537	28.2177	0.0334564	0.0912109
dHC enriched	ENSRNOG00000017791	17	54280851	54394634	+	Arhgap12	protein_coding	811.992	349.022	0.429835	-1.21815	580.507	4.61e-25	1.14e-23
dHC enriched	ENSRNOG00000008659	17	87725867	87826421	-	Arhgap21	protein_coding	3677.22	2619.31	0.712308	-0.489426	3148.26	3.55e-15	5.05e-14
dHC enriched	ENSRNOG00000003088	11	64601029	64714252	+	Arhgap31	protein_coding	162.408	100.537	0.619041	-0.691892	131.472	4.26e-05	0.00023281
dHC enriched	ENSRNOG00000016566	7	117788716	117880289	-	Arhgap39	protein_coding	1221.11	732.771	0.600084	-0.736763	976.942	6.59e-19	1.19e-17
dHC enriched	ENSRNOG00000006946	7	70612103	70620890	+	Arhgap9	protein_coding	37.3609	12.7226	0.340532	-1.55414	25.0417	7.54e-05	0.00039667
dHC enriched	ENSRNOG00000012561	16	79725643	79793619	-	Arhgef10	protein_coding	441.816	236.742	0.535838	-0.900132	339.279	3.88e-14	5.2e-13
dHC enriched	ENSRNOG00000008924	8	47259404	47393503	-	Arhgef12	protein_coding	1121.68	923.683	0.823485	-0.280185	1022.68	0.0002539	0.00122122
dHC enriched	ENSRNOG00000053502	1	165911718	165967069	-	Arhgef17	protein_coding	1778.26	1443.82	0.811932	-0.30057	1611.04	9.8e-06	5.85e-05
dHC enriched	ENSRNOG00000047967	5	159755535	159773699	+	Arhgef19	protein_coding	97.7404	67.7733	0.693402	-0.528237	82.7568	0.0137442	0.0430523
dHC enriched	ENSRNOG00000020027	2	187977008	188021367	+	Arhgef2	protein_coding	1676.68	1404.17	0.837468	-0.255895	1540.43	0.00085519	0.00369116
dHC enriched	ENSRNOG00000005034	7	70469312	70476340	-	Arhgef25	protein_coding	2191.26	805.057	0.367395	-1.4446	1498.16	1.47e-86	2.2e-84
dHC enriched	ENSRNOG00000014549	2	27107318	27236672	+	Arhgef26	protein_coding	447.787	158.294	0.353502	-1.50021	303.04	7.56e-35	2.75e-33
dHC enriched	ENSRNOG00000025502	18	56817988	56870839	-	Arhgef37	protein_coding	221.999	81.8038	0.368487	-1.44032	151.902	9.01e-18	1.51e-16
dHC enriched	ENSRNOG00000052354	15	28377996	28403090	+	Arhgef40	protein_coding	262.724	208.199	0.792464	-0.335583	235.461	0.0097228	0.0319084
dHC enriched	ENSRNOG00000000869	X	159723866	159841072	-	Arhgef6	protein_coding	113.752	63.415	0.557483	-0.843001	88.5837	5.42e-05	0.00029156
dHC enriched	ENSRNOG00000007733	X	64248278	64428592	-	Arhgef9	processed_transcript	4623.87	4229.54	0.914719	-0.128599	4426.71	0.0134985	0.0423599
dHC enriched	ENSRNOG00000017030	1	45923222	46233374	+	Arid1b	protein_coding	1302.85	861.711	0.661405	-0.596393	1082.28	5.46e-13	6.75e-12
dHC enriched	ENSRNOG00000015382	9	42871950	42884855	+	Arid5a	protein_coding	101.355	68.1629	0.672518	-0.572354	84.7588	0.0107677	0.0348456
dHC enriched	ENSRNOG00000011105	2	45668969	46050564	+	Arl15	protein_coding	246.444	52.5446	0.213211	-2.22964	149.494	5.08e-32	1.73e-30
dHC enriched	ENSRNOG00000006818	4	129574264	129598915	+	Arl6ip5	protein_coding	1028.36	899.434	0.874631	-0.193253	963.896	0.00990621	0.0324176
dHC enriched	ENSRNOG00000000996	12	11272609	11294058	-	Arpc1a	protein_coding	1913.58	1456.49	0.761132	-0.393782	1685.04	1.19e-08	1.02e-07
dHC enriched	ENSRNOG00000000991	12	11252296	11265865	-	Arpc1b	protein_coding	117.351	70.7512	0.602902	-0.730004	94.0511	0.00098012	0.00417692
dHC enriched	ENSRNOG00000014289	9	81518176	81548871	+	Arpc2	protein_coding	3614.06	1869.58	0.517307	-0.950908	2741.82	3.07e-47	1.78e-45
dHC enriched	ENSRNOG00000008673	12	39653953	39667849	-	Arpc3	protein_coding	1260.59	1069.02	0.848028	-0.237817	1164.8	0.0009009	0.00386999
dHC enriched	ENSRNOG00000028062	13	70174936	70183879	+	Arpc5	protein_coding	1574.39	724.831	0.460388	-1.11908	1149.61	1.68e-44	8.92e-43
dHC enriched	ENSRNOG00000019009	16	20352480	20356612	+	Arrdc2	protein_coding	191.957	100.461	0.523351	-0.93415	146.209	2.87e-08	2.35e-07
dHC enriched	ENSRNOG00000012953	7	130446668	130451283	-	Arsa	protein_coding	519.347	429.238	0.826495	-0.274921	474.293	0.00543098	0.0192502
dHC enriched	ENSRNOG00000011150	2	23385183	23544963	+	Arsb	protein_coding	1548.64	1359.28	0.877728	-0.188154	1453.96	0.0047352	0.0170745
dHC enriched	ENSRNOG00000003931	10	97771264	97863311	+	Arsg	protein_coding	372.558	266.592	0.715573	-0.48283	319.575	3.78e-05	0.00020843
dHC enriched	ENSRNOG00000010099	7	139724346	139734568	-	Asb8	protein_coding	766.416	658.808	0.859596	-0.218269	712.612	0.00689481	0.0236992
dHC enriched	ENSRNOG00000007546	4	33743364	33761163	-	Asns	protein_coding	1130.05	821.37	0.726842	-0.460286	975.711	2.67e-09	2.45e-08
dHC enriched	ENSRNOG00000003942	9	53004499	53009054	+	Asnsd1	protein_coding	382.004	327.008	0.856031	-0.224265	354.506	0.0359643	0.0967749
dHC enriched	ENSRNOG00000019659	10	59867781	59892708	-	Aspa	protein_coding	148.683	77.6803	0.522456	-0.936617	113.182	3.45e-06	2.18e-05
dHC enriched	ENSRNOG00000019424	1	100470722	100473459	+	Aspdh	protein_coding	74.1846	40.2548	0.542631	-0.881957	57.2197	0.00072357	0.00316195
dHC enriched	ENSRNOG00000061004	12	50269347	50279745	+	Asphd2	protein_coding	1208.3	527.393	0.436476	-1.19603	867.845	1.04e-36	4.05e-35
dHC enriched	ENSRNOG00000020202	1	225309246	225329770	-	Asrgl1	protein_coding	1098.88	872.19	0.793705	-0.333326	985.537	6.16e-06	3.77e-05
dHC enriched	ENSRNOG00000060105	5	81179605	82168427	-	Astn2	protein_coding	435.52	321.051	0.737168	-0.439935	378.286	0.00030445	0.00144218
dHC enriched	ENSRNOG00000001808	4	180855800	180887050	-	Asun	protein_coding	210.385	171.038	0.812976	-0.298716	190.711	0.0333602	0.0909919
dHC enriched	ENSRNOG00000020060	1	100808241	100810522	-	Atf5	protein_coding	347.996	173.82	0.499488	-1.00148	260.908	4.1e-15	5.81e-14
dHC enriched	ENSRNOG00000008767	5	117877594	117931003	+	Atg4c	protein_coding	314.971	189.679	0.602211	-0.731658	252.325	5.69e-09	5.06e-08
dHC enriched	ENSRNOG00000000322	20	49318308	49393140	+	Atg5	protein_coding	198.487	145.45	0.732794	-0.44852	171.968	0.00622718	0.0216905
dHC enriched	ENSRNOG00000003472	X	143346252	143453612	-	Atp11c	protein_coding	98.9581	40.3821	0.408072	-1.2931	69.6701	6.07e-08	4.82e-07
dHC enriched	ENSRNOG00000001714	11	74834050	74968336	+	Atp13a4	protein_coding	109.766	64.7699	0.590074	-0.761033	87.2678	0.000225	0.00109156
dHC enriched	ENSRNOG00000007290	13	90651686	90676629	-	Atp1a2	protein_coding	19772.6	11415.2	0.577324	-0.792547	15593.9	1.35e-47	7.94e-46
dHC enriched	ENSRNOG00000020263	1	81852429	81881549	-	Atp1a3	protein_coding	27075.5	23720.6	0.876088	-0.190852	25398.1	0.00541029	0.019191
dHC enriched	ENSRNOG00000002934	13	82737159	82758004	-	Atp1b1	protein_coding	15571.1	13806.2	0.886655	-0.173555	14688.6	0.00060816	0.00270434
dHC enriched	ENSRNOG00000011227	10	56205625	56211891	-	Atp1b2	protein_coding	4992.55	3140.03	0.628943	-0.668999	4066.29	2.73e-36	1.04e-34
dHC enriched	ENSRNOG00000011501	8	104190032	104221342	-	Atp1b3	protein_coding	757.402	655.033	0.864842	-0.209491	706.217	0.0103942	0.0338151
dHC enriched	ENSRNOG00000017912	10	59529785	59560433	+	Atp2a3	protein_coding	57.8816	33.2787	0.574945	-0.798504	45.5802	0.00435247	0.0158305
dHC enriched	ENSRNOG00000004026	7	41114697	41220579	+	Atp2b1	protein_coding	7125.87	5107.87	0.716807	-0.480343	6116.87	4.74e-11	5.04e-10
dHC enriched	ENSRNOG00000061304	X	157239306	157312028	-	Atp2b3	protein_coding	2611.62	1579.79	0.604908	-0.725213	2095.71	5.1e-30	1.59e-28
dHC enriched	ENSRNOG00000003269	10	16769666	16792909	-	Atp6v0e1	protein_coding	151.997	95.9675	0.631379	-0.663421	123.982	0.00025752	0.00123586
dHC enriched	ENSRNOG00000034200	14	42015347	42206311	+	Atp8a1	protein_coding	2241.77	1734.6	0.77376	-0.370041	1988.19	2.96e-09	2.7e-08
dHC enriched	ENSRNOG00000052298	14	42007312	42009998	+	Atp8a1	protein_coding	179.231	142.329	0.794109	-0.332591	160.78	0.0361097	0.0970941
dHC enriched	ENSRNOG00000006326	6	26680598	26685235	-	Atraid	protein_coding	212.706	166.564	0.78307	-0.352787	189.635	0.0154331	0.0475035
dHC enriched	ENSRNOG00000018691	5	173256637	173276169	+	Aurkaip1	protein_coding	1035.85	883.495	0.85292	-0.229518	959.671	0.00424853	0.0154918
dHC enriched	ENSRNOG00000018691	5	173256637	173276169	+	Aurkaip1	protein_coding	1035.85	883.495	0.85292	-0.229518	959.671	0.00424853	0.0154918
dHC enriched	ENSRNOG00000005659	10	55626741	55634991	+	Aurkb	protein_coding	19.273	2.85658	0.148217	-2.75422	11.0648	8.2e-05	0.00042857
dHC enriched	ENSRNOG00000000885	12	28212333	28251816	+	Auts2	protein_coding	339.051	217.699	0.642083	-0.639167	278.375	2.04e-07	1.53e-06
dHC enriched	ENSRNOG00000004400	7	67341080	67345308	-	Avpr1a	protein_coding	19.258	4.5972	0.238716	-2.06663	11.9276	0.00034575	0.00162087
dHC enriched	ENSRNOG00000020716	1	82549420	82580761	-	Axl	protein_coding	454.017	283.405	0.624216	-0.679882	368.711	1.22e-10	1.25e-09
dHC enriched	ENSRNOG00000017123	3	114087287	114093309	+	B2m	protein_coding	1885.86	1227.56	0.650928	-0.619431	1556.71	8.39e-15	1.17e-13
dHC enriched	ENSRNOG00000030983	11	36634662	36683672	+	B3galt5	protein_coding	451.581	135.091	0.29915	-1.74106	293.336	6.13e-43	3.08e-41
dHC enriched	ENSRNOG00000007142	8	27777179	27804515	+	B3gat1	protein_coding	4871.67	2923.34	0.600068	-0.736801	3897.5	3.49e-32	1.2e-30
dHC enriched	ENSRNOG00000046852	9	29984077	30068649	+	B3gat2	protein_coding	440.143	145.06	0.329575	-1.60132	292.602	1.7e-34	6.13e-33
dHC enriched	ENSRNOG00000008277	5	57254421	57267002	-	Bag1	protein_coding	338.18	223.081	0.659652	-0.600223	280.631	3.66e-06	2.31e-05
dHC enriched	ENSRNOG00000012709	9	38456468	38467118	+	Bag2	protein_coding	60.1686	40.1393	0.667114	-0.583994	50.1539	0.0287817	0.0802212
dHC enriched	ENSRNOG00000020298	1	199941161	199965191	+	Bag3	protein_coding	114.502	35.1113	0.306644	-1.70536	74.8066	4.69e-13	5.82e-12
dHC enriched	ENSRNOG00000010428	3	110723481	110732060	+	Bahd1	protein_coding	794.229	568.462	0.715741	-0.482491	681.346	1.83e-07	1.38e-06
dHC enriched	ENSRNOG00000020460	1	220744195	220746224	-	Banf1	protein_coding	598.622	409.232	0.683624	-0.548725	503.927	3.4e-09	3.09e-08
dHC enriched	ENSRNOG00000019140	19	54766589	54840569	+	Banp	protein_coding	297.616	238.794	0.802356	-0.317686	268.205	0.0199025	0.0588394
dHC enriched	ENSRNOG00000029399	1	80674444	80689171	-	Bcam	protein_coding	114.507	81.7725	0.714124	-0.485754	98.1399	0.0166686	0.0507254
dHC enriched	ENSRNOG00000018798	2	187359677	187372657	-	Bcan	protein_coding	3407.63	1805.18	0.529748	-0.916622	2606.41	7.17e-55	5.01e-53
dHC enriched	ENSRNOG00000019253	19	43932554	43955783	-	Bcar1	protein_coding	563.03	481.609	0.855387	-0.225351	522.319	0.0196184	0.0581987
dHC enriched	ENSRNOG00000012906	3	167957994	168033457	-	Bcas1	protein_coding	1456.57	716.997	0.49225	-1.02254	1086.78	3.27e-06	2.07e-05
dHC enriched	ENSRNOG00000009826	2	171100140	171196395	-	Bche	protein_coding	76.2788	49.0047	0.642442	-0.638361	62.6418	0.00680194	0.0234174
dHC enriched	ENSRNOG00000020607	1	82423277	82452281	-	Bckdha	protein_coding	486.478	381.921	0.785073	-0.3491	434.2	0.00062009	0.0027531
dHC enriched	ENSRNOG00000007049	14	108826831	108921669	+	Bcl11a	protein_coding	733.98	595.184	0.810899	-0.302406	664.582	0.00190612	0.00760855
dHC enriched	ENSRNOG00000005776	6	131834097	131926272	-	Bcl11b	protein_coding	1335.78	512.977	0.384027	-1.38072	924.379	7.74e-41	3.63e-39
dHC enriched	ENSRNOG00000001843	11	80255790	80279075	+	Bcl6	protein_coding	541.676	261.897	0.483494	-1.04843	401.787	3.2e-15	4.56e-14
dHC enriched	ENSRNOG00000059956	10	56834364	56839437	-	Bcl6b	protein_coding	39.9608	17.7877	0.445129	-1.16771	28.8743	0.00135799	0.00560668
dHC enriched	ENSRNOG00000038746	8	54965583	54998864	-	Bco2	protein_coding	16.1471	5.17477	0.320477	-1.64171	10.6609	0.00791068	0.0267631
dHC enriched	ENSRNOG00000047466	3	100768637	100819210	+	Bdnf	protein_coding	332.668	245.848	0.739018	-0.436319	289.258	0.00039888	0.0018433
dHC enriched	ENSRNOG00000004650	6	132936970	132972511	-	Begain	protein_coding	1675.17	1496.34	0.893248	-0.162868	1585.76	0.0167964	0.051042
dHC enriched	ENSRNOG00000055962	X	157319046	157331204	-	Bgn	protein_coding	192.951	69.7626	0.361557	-1.46771	131.357	1.11e-16	1.74e-15
dHC enriched	ENSRNOG00000021745	2	102685513	102688624	+	Bhlhe22	protein_coding	1605	254.245	0.158408	-2.65828	929.623	1.35e-154	7.52e-152
dHC enriched	ENSRNOG00000048961	4	180232382	180234804	-	Bhlhe41	protein_coding	249.168	126.979	0.50961	-0.972534	188.074	4.8e-11	5.1e-10
dHC enriched	ENSRNOG00000016031	17	15673650	15718035	-	Bicd2	protein_coding	1131.96	962.442	0.850246	-0.234048	1047.2	0.00313275	0.0118327
dHC enriched	ENSRNOG00000043311	3	176439199	176443195	+	Birc7	protein_coding	19.2946	8.46995	0.438981	-1.18777	13.8823	0.0194801	0.0578482
dHC enriched	ENSRNOG00000016497	17	26808330	26833247	+	Bloc1s5	protein_coding	178.268	138.728	0.778201	-0.361786	158.498	0.0218428	0.0636972
dHC enriched	ENSRNOG00000002040	14	14129725	14192048	-	Bmp2k	protein_coding	259.696	203.962	0.785389	-0.348521	231.829	0.00737728	0.0251964
dHC enriched	ENSRNOG00000009694	15	20776054	20822740	-	Bmp4	protein_coding	98.0327	49.32	0.503097	-0.991091	73.6763	1.13e-05	6.66e-05
dHC enriched	ENSRNOG00000013717	17	26955142	27112820	-	Bmp6	protein_coding	97.9365	40.9812	0.418447	-1.25688	69.4589	2.63e-07	1.95e-06
dHC enriched	ENSRNOG00000053384	3	170879973	170955399	-	Bmp7	protein_coding	41.7923	23.9042	0.571976	-0.805973	32.8483	0.0165789	0.0504951
dHC enriched	ENSRNOG00000052469	16	10758527	10802512	-	Bmpr1a	protein_coding	423.034	267.121	0.631441	-0.663281	345.077	4.04e-09	3.64e-08
dHC enriched	ENSRNOG00000052469	16	10758527	10802512	-	Bmpr1a	protein_coding	423.034	267.121	0.631441	-0.663281	345.077	4.04e-09	3.64e-08
dHC enriched	ENSRNOG00000018214	9	100829552	100840504	+	Bok	protein_coding	841.268	256.932	0.30541	-1.71118	549.1	3.47e-64	3.18e-62
dHC enriched	ENSRNOG00000021773	7	117514533	117538342	-	Bop1	protein_coding	523.542	432.77	0.82662	-0.274704	478.156	0.00372151	0.0137893
dHC enriched	ENSRNOG00000017577	17	31498883	31535172	-	Bphl	protein_coding	109.331	78.9276	0.721912	-0.470105	94.1294	0.0192282	0.057209
dHC enriched	ENSRNOG00000010957	4	67396192	67520356	-	Braf	protein_coding	454.484	385.191	0.847534	-0.238656	419.838	0.0265348	0.0749233
dHC enriched	ENSRNOG00000005561	5	84919367	85123829	-	Brinp1	protein_coding	2849.47	2103.03	0.738044	-0.438222	2476.25	4.52e-11	4.83e-10
dHC enriched	ENSRNOG00000010184	4	145559206	145574438	+	Brk1	protein_coding	1835.32	1531.73	0.834587	-0.260865	1683.52	5.32e-05	0.00028672
dHC enriched	ENSRNOG00000008142	4	145264462	145280857	+	Brpf1	protein_coding	519.73	347.021	0.667695	-0.582738	433.376	4.41e-09	3.96e-08
dHC enriched	ENSRNOG00000002291	X	79824782	79909678	-	Brwd3	protein_coding	128.031	97.1167	0.758541	-0.398701	112.574	0.0255944	0.0726321
dHC enriched	ENSRNOG00000008414	7	12875537	12882753	-	Bsg	protein_coding	5634.98	4535.39	0.804862	-0.313186	5085.18	6.13e-09	5.42e-08
dHC enriched	ENSRNOG00000015105	5	78334284	78356460	+	Bspry	protein_coding	380.019	141.369	0.372006	-1.4266	260.694	9.07e-26	2.33e-24
dHC enriched	ENSRNOG00000019529	1	143609731	143647124	-	Btbd1	protein_coding	1899.18	1729.24	0.910523	-0.135233	1814.21	0.024878	0.0709386
dHC enriched	ENSRNOG00000036675	1	201337416	201391252	+	Btbd16	protein_coding	60.1217	4.62068	0.0768555	-3.70171	32.3712	1.19e-17	1.97e-16
dHC enriched	ENSRNOG00000003109	10	103334052	103340922	-	Btbd17	protein_coding	165.365	61.5746	0.372356	-1.42525	113.47	8.6e-13	1.05e-11
dHC enriched	ENSRNOG00000008088	3	131351587	131357929	+	Btbd3	protein_coding	1835.02	913.88	0.498022	-1.00572	1374.45	9.58e-36	3.57e-34
dHC enriched	ENSRNOG00000000540	20	8901931	9249820	-	Btbd9	protein_coding	567.282	354.587	0.625062	-0.677928	460.935	6.06e-12	6.96e-11
dHC enriched	ENSRNOG00000019656	16	7758996	7791243	+	Btd	protein_coding	118.532	82.9824	0.700084	-0.5144	100.757	0.00973489	0.0319336
dHC enriched	ENSRNOG00000004284	7	37812831	37815088	+	Btg1	protein_coding	411.697	203.931	0.495343	-1.0135	307.814	5.11e-17	8.16e-16
dHC enriched	ENSRNOG00000001555	11	16873646	16889201	-	Btg3	protein_coding	220.313	158.765	0.720636	-0.472657	189.539	0.00323864	0.0121865
dHC enriched	ENSRNOG00000000989	12	11232964	11240400	-	Bud31	protein_coding	340.079	266.386	0.783307	-0.35235	303.233	0.00286073	0.0109149
dHC enriched	ENSRNOG00000005096	6	55586346	55647665	-	Bzw2	protein_coding	490.877	365.152	0.743877	-0.426865	428.014	2.27e-05	0.00012856
dHC enriched	ENSRNOG00000012807	5	155261250	155264143	-	C1qa	protein_coding	305.924	199.018	0.650547	-0.620274	252.471	9.38e-05	0.00048496
dHC enriched	ENSRNOG00000012749	5	155246447	155252003	-	C1qb	protein_coding	239.914	155.66	0.648817	-0.624116	197.787	1.18e-05	6.93e-05
dHC enriched	ENSRNOG00000012804	5	155255005	155258392	-	C1qc	protein_coding	132.29	92.0887	0.696113	-0.522606	112.189	0.00940495	0.0310114
dHC enriched	ENSRNOG00000002963	10	91040005	91047177	-	C1ql1	protein_coding	134.151	72.3079	0.539005	-0.891629	103.229	2.56e-06	1.65e-05
dHC enriched	ENSRNOG00000046863	13	36378356	36380302	+	C1ql2	protein_coding	1000.95	15.7847	0.0157697	-5.9867	508.367	2.28e-55	1.62e-53
dHC enriched	ENSRNOG00000007613	8	48443767	48445637	+	C1qtnf5	protein_coding	185.194	81.5434	0.440314	-1.1834	133.369	6.03e-12	6.93e-11
dHC enriched	ENSRNOG00000007300	7	119746118	119753290	-	C1qtnf6	protein_coding	40.7336	8.9007	0.21851	-2.19423	24.8172	1.48e-07	1.12e-06
dHC enriched	ENSRNOG00000011796	4	157125998	157136829	+	C1r	protein_coding	113.935	72.7444	0.638471	-0.647307	93.3399	0.00163272	0.0066384
dHC enriched	ENSRNOG00000011971	4	157143592	157155609	-	C1s	protein_coding	92.6735	27.1994	0.293497	-1.76858	59.9365	1.11e-11	1.24e-10
dHC enriched	ENSRNOG00000017297	9	92834357	92895778	+	Cab39	protein_coding	1597.71	1439.13	0.900746	-0.150808	1518.42	0.0260999	0.0738717
dHC enriched	ENSRNOG00000057703	14	84968130	84978255	-	Cabp7	protein_coding	3566.18	127.556	0.0357683	-4.80518	1846.87	0	0
dHC enriched	ENSRNOG00000010514	5	119727839	119831634	+	Cachd1	protein_coding	250.33	207.524	0.829001	-0.270554	228.927	0.036868	0.098805
dHC enriched	ENSRNOG00000052707	19	25526751	25749550	+	Cacna1a	protein_coding	3025.52	2640.93	0.872884	-0.196138	2833.22	0.00838152	0.0280685
dHC enriched	ENSRNOG00000007090	4	150641066	150829913	-	Cacna1c	protein_coding	819.895	613.997	0.748873	-0.417208	716.946	1.07e-06	7.29e-06
dHC enriched	ENSRNOG00000002863	13	71906702	72367980	-	Cacna1e	protein_coding	3378.97	2910.54	0.861371	-0.215294	3144.76	0.00061972	0.00275219
dHC enriched	ENSRNOG00000033893	10	14730941	14788617	-	Cacna1h	protein_coding	1941.53	799.839	0.411964	-1.27941	1370.68	1.12e-77	1.42e-75
dHC enriched	ENSRNOG00000031287	16	4871650	5795825	-	Cacna2d3	protein_coding	2206.58	1530.55	0.693632	-0.527759	1868.56	2.51e-16	3.85e-15
dHC enriched	ENSRNOG00000018378	17	81798756	82017682	+	Cacnb2	protein_coding	686.944	410.971	0.59826	-0.741155	548.957	6.43e-14	8.52e-13
dHC enriched	ENSRNOG00000056257	1	64374603	64405149	-	Cacng7	protein_coding	1298.98	1092.59	0.841116	-0.249624	1195.79	0.0005113	0.00231675
dHC enriched	ENSRNOG00000057848	1	64330106	64350338	-	Cacng8	protein_coding	1365.96	462.981	0.338942	-1.56089	914.47	1.89e-81	2.56e-79
dHC enriched	ENSRNOG00000030840	11	4174881	4397361	-	Cadm2	protein_coding	1109.28	573.466	0.516972	-0.951842	841.373	1.82e-32	6.29e-31
dHC enriched	ENSRNOG00000010233	4	62220736	62291489	+	Cald1	protein_coding	221.031	176.916	0.800409	-0.32119	198.973	0.0236288	0.068042
dHC enriched	ENSRNOG00000016770	1	78843080	78851719	-	Calm1	protein_coding	12306.8	10561.7	0.858198	-0.220617	11434.2	2.47e-05	0.00013945
dHC enriched	ENSRNOG00000038202	8	67753279	67765358	+	Calml4	protein_coding	88.2852	24.8577	0.281561	-1.82848	56.5715	1.21e-11	1.35e-10
dHC enriched	ENSRNOG00000017882	17	76532611	76938956	+	Camk1d	protein_coding	1909.42	945.906	0.49539	-1.01336	1427.66	5.89e-48	3.49e-46
dHC enriched	ENSRNOG00000018712	18	56193978	56295869	+	Camk2a	protein_coding	24601.6	11674.8	0.474553	-1.07536	18138.2	6.29e-62	5.23e-60
dHC enriched	ENSRNOG00000052080	14	86208901	86297652	-	Camk2b	protein_coding	18865.1	8504.19	0.450789	-1.14947	13684.6	1.59e-108	3.42e-106
dHC enriched	ENSRNOG00000020478	18	25749098	25965957	+	Camk4	protein_coding	555.599	380.277	0.684445	-0.546994	467.938	1.22e-07	9.35e-07
dHC enriched	ENSRNOG00000018242	10	59585072	59608165	+	Camkk1	protein_coding	4322.86	1875.96	0.433962	-1.20436	3099.41	2.82e-63	2.48e-61
dHC enriched	ENSRNOG00000004283	10	57291192	57309298	-	Camta2	protein_coding	5585.79	3239.94	0.580032	-0.785795	4412.86	1.26e-49	7.86e-48
dHC enriched	ENSRNOG00000003239	10	107432506	107445522	-	Cant1	protein_coding	409.613	344.635	0.841366	-0.249195	377.124	0.0161525	0.0494006
dHC enriched	ENSRNOG00000013492	5	140559206	140585408	-	Cap1	protein_coding	3841.6	2613.06	0.680202	-0.555965	3227.33	3.06e-17	4.92e-16
dHC enriched	ENSRNOG00000019273	16	7435634	7471807	+	Capn7	protein_coding	484.94	357.367	0.73693	-0.4404	421.154	1.88e-05	0.00010816
dHC enriched	ENSRNOG00000056207	4	44936290	44972267	+	Capza2	protein_coding	2801.92	1892.31	0.675362	-0.566268	2347.12	6.13e-17	9.75e-16
dHC enriched	ENSRNOG00000007330	5	157642751	157742478	+	Capzb	protein_coding	2369.57	1908.14	0.805267	-0.312461	2138.85	3.03e-06	1.93e-05
dHC enriched	ENSRNOG00000021017	1	101682172	101687293	+	Car11	protein_coding	1308.61	1158.01	0.884916	-0.176388	1233.31	0.0134372	0.0421829
dHC enriched	ENSRNOG00000017766	8	72405748	72460240	+	Car12	protein_coding	698.942	112.95	0.161602	-2.62948	405.946	5.86e-83	8.47e-81
dHC enriched	ENSRNOG00000023162	2	198010349	198016898	-	Car14	protein_coding	89.5008	55.1859	0.616597	-0.697601	72.3433	0.00154083	0.00629955
dHC enriched	ENSRNOG00000009629	2	88097720	88113029	-	Car2	protein_coding	1781.78	902.075	0.506277	-0.982003	1341.93	6.11e-07	4.31e-06
dHC enriched	ENSRNOG00000002916	10	72272248	72281067	+	Car4	protein_coding	192.878	143.833	0.745718	-0.423299	168.355	0.00410827	0.0150473
dHC enriched	ENSRNOG00000021355	5	167226246	167244786	-	Car6	protein_coding	137.711	100.723	0.731408	-0.451252	119.217	0.0126189	0.0399493
dHC enriched	ENSRNOG00000012371	19	636545	645937	-	Car7	protein_coding	222.406	170.727	0.767634	-0.381509	196.566	0.0149426	0.0462752
dHC enriched	ENSRNOG00000001271	2	54810110	54824033	-	Card6	protein_coding	67.9874	33.3336	0.49029	-1.02829	50.6605	0.0001292	0.00065339
dHC enriched	ENSRNOG00000002610	10	7041510	7055101	+	Carhsp1	protein_coding	390.121	262.88	0.673841	-0.569521	326.5	2.94e-05	0.00016432
dHC enriched	ENSRNOG00000018603	1	219414915	219422268	-	Carns1	protein_coding	137.973	91.7597	0.665056	-0.588453	114.866	0.00507271	0.0181469
dHC enriched	ENSRNOG00000016357	3	113818872	113887495	+	Casc4	protein_coding	1249.52	1086.5	0.869538	-0.201679	1168.01	0.00411866	0.0150747
dHC enriched	ENSRNOG00000004310	10	104344099	104358253	-	Caskin2	protein_coding	429.242	290.976	0.677883	-0.560892	360.109	1.93e-06	1.27e-05
dHC enriched	ENSRNOG00000008364	3	93379874	93412058	-	Cat	protein_coding	843.554	648.449	0.76871	-0.379488	746.001	3.1e-06	1.98e-05
dHC enriched	ENSRNOG00000056836	4	44597123	44630200	+	Cav1	protein_coding	241.54	179.935	0.744948	-0.424789	210.737	0.00235905	0.0091821
dHC enriched	ENSRNOG00000057713	4	44573264	44580638	+	Cav2	protein_coding	96.0578	67.6206	0.703957	-0.50644	81.8392	0.0140823	0.0439593
dHC enriched	ENSRNOG00000014723	19	55441572	55510460	-	Cbfa2t3	protein_coding	323.475	250.737	0.775135	-0.36748	287.106	0.00661042	0.0228541
dHC enriched	ENSRNOG00000001982	11	51037393	51202820	-	Cblb	protein_coding	409.745	271.788	0.66331	-0.592244	340.767	1.11e-06	7.5e-06
dHC enriched	ENSRNOG00000029528	20	10361988	10386751	-	Cbs	protein_coding	702.542	537.534	0.765128	-0.386228	620.038	9.59e-05	0.00049526
dHC enriched	ENSRNOG00000046207	10	108190995	108196217	-	Cbx4	protein_coding	264.155	209.18	0.791883	-0.33664	236.668	0.010504	0.0341205
dHC enriched	ENSRNOG00000048113	10	108148073	108150511	-	Cbx8	protein_coding	66.475	43.9122	0.660581	-0.598192	55.1936	0.0235636	0.0678854
dHC enriched	ENSRNOG00000059715	14	71895246	71973419	-	Cc2d2a	protein_coding	507.472	419.453	0.826554	-0.27482	463.462	0.0363975	0.0977265
dHC enriched	ENSRNOG00000016097	3	8752625	8766433	-	Ccbl1	protein_coding	186.158	122.376	0.657377	-0.605206	154.267	0.00010034	0.00051627
dHC enriched	ENSRNOG00000020946	8	118926478	118977051	+	Ccdc12	protein_coding	135.597	102.276	0.754262	-0.406863	118.937	0.0220596	0.0642244
dHC enriched	ENSRNOG00000025643	8	130437157	130475320	-	Ccdc13	protein_coding	70.092	45.4452	0.648365	-0.625121	57.7686	0.012739	0.0402481
dHC enriched	ENSRNOG00000007262	7	123364312	123376221	+	Ccdc134	protein_coding	140.096	44.8461	0.32011	-1.64336	92.4711	5.72e-15	8.02e-14
dHC enriched	ENSRNOG00000012580	3	63863951	64024205	-	Ccdc141	protein_coding	241.979	165.558	0.684181	-0.547549	203.768	6.77e-05	0.00035945
dHC enriched	ENSRNOG00000039473	2	53116101	53140637	-	Ccdc152	protein_coding	115.43	73.2751	0.634802	-0.655621	94.3524	0.00103797	0.00439838
dHC enriched	ENSRNOG00000056358	5	171312793	171327450	-	Ccdc27	protein_coding	54.6492	6.5042	0.119017	-3.07076	30.5767	1.74e-13	2.24e-12
dHC enriched	ENSRNOG00000002748	10	90644995	90657185	-	Ccdc43	protein_coding	192.615	133.485	0.693015	-0.529042	163.05	0.00088519	0.00380916
dHC enriched	ENSRNOG00000009006	10	94388430	94406949	-	Ccdc47	protein_coding	1709.45	1542.54	0.902358	-0.148228	1626	0.0317534	0.0871623
dHC enriched	ENSRNOG00000002052	11	60645661	60679249	-	Ccdc80	protein_coding	149.807	54.806	0.365843	-1.4507	102.307	6.05e-13	7.46e-12
dHC enriched	ENSRNOG00000033733	1	154064256	154111725	-	Ccdc81	protein_coding	31.3887	17.7485	0.565443	-0.822546	24.5686	0.0339104	0.092215
dHC enriched	ENSRNOG00000003374	14	112719482	112946875	-	Ccdc85a	protein_coding	474.222	365.103	0.769899	-0.377259	419.662	0.00075882	0.00330171
dHC enriched	ENSRNOG00000003374	14	112719482	112946875	-	Ccdc85a	protein_coding	474.222	365.103	0.769899	-0.377259	419.662	0.00075882	0.00330171
dHC enriched	ENSRNOG00000024931	1	222102404	222119393	-	Ccdc88b	protein_coding	57.177	27.0036	0.472281	-1.08228	42.0903	0.00024413	0.00117586
dHC enriched	ENSRNOG00000021691	12	37211316	37237848	+	Ccdc92	protein_coding	725.512	633.892	0.873717	-0.194763	679.702	0.0314822	0.086542
dHC enriched	ENSRNOG00000002514	13	37400476	37468840	+	Ccdc93	protein_coding	168.218	128.831	0.76586	-0.384848	148.524	0.0142281	0.044318
dHC enriched	ENSRNOG00000047456	9	11098924	11108741	-	Ccdc94	protein_coding	263.733	191.455	0.725943	-0.462072	227.594	0.00049365	0.00224507
dHC enriched	ENSRNOG00000020918	1	218090750	218100325	-	Ccnd1	protein_coding	256.609	150.644	0.587056	-0.768431	203.627	4.1e-07	2.95e-06
dHC enriched	ENSRNOG00000057710	4	159674885	159697207	-	Ccnd2	protein_coding	589.556	323.444	0.548624	-0.866111	456.5	1.46e-17	2.39e-16
dHC enriched	ENSRNOG00000050258	9	15404822	15410943	-	Ccnd3	protein_coding	381.612	244.107	0.639674	-0.644591	312.86	3.63e-08	2.95e-07
dHC enriched	ENSRNOG00000014786	1	94485832	94494980	-	Ccne1	protein_coding	156.168	114.444	0.732827	-0.448456	135.306	0.00772798	0.0261965
dHC enriched	ENSRNOG00000003256	10	25903911	25910325	-	Ccng1	protein_coding	2602.43	1955.63	0.751462	-0.412229	2279.03	3.51e-12	4.08e-11
dHC enriched	ENSRNOG00000003893	10	29123273	29182568	+	Ccnjl	protein_coding	68.932	22.5807	0.327579	-1.61008	45.7563	1.34e-07	1.02e-06
dHC enriched	ENSRNOG00000011586	2	157747542	157759838	-	Ccnl1	protein_coding	284.192	237.3	0.834999	-0.260154	260.746	0.0330696	0.0902997
dHC enriched	ENSRNOG00000011586	2	157747542	157759838	-	Ccnl1	protein_coding	284.192	237.3	0.834999	-0.260154	260.746	0.0330696	0.0902997
dHC enriched	ENSRNOG00000011632	2	84667633	84678790	-	Cct5	protein_coding	1787.92	1478.37	0.826867	-0.274273	1633.15	0.00042023	0.00193415
dHC enriched	ENSRNOG00000025332	8	85951191	86065409	+	Cd109	protein_coding	22.4213	10.2321	0.456356	-1.13177	16.3267	0.0165702	0.0504806
dHC enriched	ENSRNOG00000000321	20	48335540	48340846	+	Cd24	protein_coding	597.122	452.757	0.758232	-0.399288	524.939	2.78e-05	0.00015608
dHC enriched	ENSRNOG00000004698	13	89975267	89995974	+	Cd244	protein_coding	35.3774	11.679	0.330125	-1.59892	23.5282	7.81e-05	0.00041007
dHC enriched	ENSRNOG00000003069	14	71715269	71754672	-	Cd38	protein_coding	120.18	57.2946	0.476738	-1.06873	88.7374	1.5e-07	1.14e-06
dHC enriched	ENSRNOG00000016069	8	49297608	49308806	-	Cd3e	protein_coding	95.8256	4.16449	0.043459	-4.5242	49.995	4.64e-27	1.28e-25
dHC enriched	ENSRNOG00000006094	3	92696313	92783658	-	Cd44	protein_coding	90.5716	22.2282	0.245422	-2.02667	56.3999	6.85e-14	9.06e-13
dHC enriched	ENSRNOG00000004737	13	90116843	90140371	+	Cd48	protein_coding	132.415	61.7781	0.46655	-1.0999	97.0964	1.34e-06	9e-06
dHC enriched	ENSRNOG00000042821	3	94010475	94028621	+	Cd59	protein_coding	784.843	565.251	0.720209	-0.473512	675.047	7.39e-08	5.81e-07
dHC enriched	ENSRNOG00000007650	7	3320103	3335582	+	Cd63	protein_coding	496.143	342.649	0.690626	-0.534024	419.396	4.47e-07	3.2e-06
dHC enriched	ENSRNOG00000020451	1	216237697	216253311	+	Cd81	protein_coding	4493.96	3562.01	0.792621	-0.335298	4027.99	1.5e-08	1.27e-07
dHC enriched	ENSRNOG00000000047	3	82324354	82368357	-	Cd82	protein_coding	394.334	162.217	0.411371	-1.28149	278.276	3.78e-24	8.84e-23
dHC enriched	ENSRNOG00000019556	4	157977162	158010166	-	Cd9	protein_coding	544.143	308.726	0.567362	-0.817658	426.435	6.94e-12	7.92e-11
dHC enriched	ENSRNOG00000050735	20	56192390	56197025	-	Cd99	protein_coding	238.43	168.408	0.706323	-0.5016	203.419	0.00070797	0.00310401
dHC enriched	ENSRNOG00000014515	2	219302577	219458271	-	Cdc14a	protein_coding	46.9354	29.1651	0.621389	-0.686432	38.0502	0.0299077	0.0828496
dHC enriched	ENSRNOG00000000581	20	48503973	48574546	+	Cdc40	protein_coding	911.626	244.65	0.268366	-1.89772	578.138	2.89e-73	3.27e-71
dHC enriched	ENSRNOG00000027456	1	221673590	221693518	+	Cdc42bpg	protein_coding	182.218	35.7026	0.195934	-2.35156	108.96	4.17e-30	1.31e-28
dHC enriched	ENSRNOG00000008517	7	120067379	120071440	+	Cdc42ep1	protein_coding	197.49	119.738	0.6063	-0.721897	158.614	4.27e-05	0.00023305
dHC enriched	ENSRNOG00000028946	10	102244681	102269272	-	Cdc42ep4	protein_coding	1119.47	526.698	0.470488	-1.08777	823.085	5.95e-33	2.07e-31
dHC enriched	ENSRNOG00000060538	2	196402837	196410659	+	Cdc42se1	protein_coding	677.285	475.894	0.702649	-0.509123	576.589	5.63e-08	4.48e-07
dHC enriched	ENSRNOG00000042449	10	40054400	40122915	-	Cdc42se2	protein_coding	1983.33	1689.49	0.851845	-0.231338	1836.41	0.0001469	0.00073551
dHC enriched	ENSRNOG00000042449	10	40054400	40122915	-	Cdc42se2	protein_coding	1983.33	1689.49	0.851845	-0.231338	1836.41	0.0001469	0.00073551
dHC enriched	ENSRNOG00000005410	6	145740035	145785606	+	Cdca7l	protein_coding	14.5912	5.51347	0.377863	-1.40406	10.0523	0.0315614	0.0867183
dHC enriched	ENSRNOG00000015602	18	8146971	8360684	-	Cdh2	protein_coding	1458.57	1309.78	0.897988	-0.155232	1384.17	0.0229839	0.066508
dHC enriched	ENSRNOG00000033087	20	29857637	29990111	-	Cdh23	protein_coding	44.3926	22.0931	0.497676	-1.00672	33.2429	0.00266219	0.0102369
dHC enriched	ENSRNOG00000020129	19	38669230	38719677	+	Cdh3	protein_coding	17.9469	8.15669	0.45449	-1.13768	13.0518	0.0304507	0.0841211
dHC enriched	ENSRNOG00000033837	2	66940057	67078784	+	Cdh9	protein_coding	529.366	159.4	0.301115	-1.73161	344.383	1.04e-42	5.16e-41
dHC enriched	ENSRNOG00000017917	17	10415123	10439691	-	Cdhr2	protein_coding	269.146	81.1126	0.301371	-1.73039	175.129	3.53e-26	9.35e-25
dHC enriched	ENSRNOG00000003328	10	10967658	10989936	+	Cdip1	protein_coding	3391.72	2577.24	0.759861	-0.396192	2984.48	8.36e-12	9.46e-11
dHC enriched	ENSRNOG00000000583	20	45458558	45598798	+	Cdk19	protein_coding	1103.81	912.014	0.826245	-0.275359	1007.91	0.00016042	0.00079747
dHC enriched	ENSRNOG00000025602	7	70349863	70352418	+	Cdk4	protein_coding	246.846	179.847	0.728578	-0.456844	213.346	0.00059568	0.00265846
dHC enriched	ENSRNOG00000005788	5	86387078	86554102	-	Cdk5rap2	protein_coding	309.94	195.046	0.629303	-0.668173	252.493	2.25e-07	1.68e-06
dHC enriched	ENSRNOG00000007249	4	168689163	168693964	+	Cdkn1b	protein_coding	247.839	178.695	0.721014	-0.4719	213.267	0.0009244	0.00395907
dHC enriched	ENSRNOG00000059500	1	216661080	216663721	-	Cdkn1c	protein_coding	34.5368	17.6624	0.511408	-0.967453	26.0996	0.0110163	0.0355499
dHC enriched	ENSRNOG00000008956	5	129347732	129352886	-	Cdkn2c	protein_coding	18.2401	8.14492	0.446539	-1.16314	13.1925	0.0299225	0.0828713
dHC enriched	ENSRNOG00000000158	18	40701984	40716686	-	Cdo1	protein_coding	1076.62	456.79	0.42428	-1.23691	766.707	1.3e-44	6.99e-43
dHC enriched	ENSRNOG00000025815	10	103934797	103948322	+	Cdr2l	protein_coding	352.493	205.382	0.582654	-0.779289	278.938	9.34e-10	8.94e-09
dHC enriched	ENSRNOG00000020578	1	82327955	82344345	-	Ceacam1	protein_coding	38.0396	20.9791	0.551507	-0.858549	29.5093	0.0137681	0.0431194
dHC enriched	ENSRNOG00000010918	1	91363492	91366164	+	Cebpa	protein_coding	101.663	46.0737	0.453202	-1.14178	73.8683	6.69e-07	4.68e-06
dHC enriched	ENSRNOG00000057347	3	164424515	164425910	+	Cebpb	protein_coding	93.3609	13.4333	0.143885	-2.79701	53.3971	2.5e-18	4.35e-17
dHC enriched	ENSRNOG00000050869	11	89008008	89009146	+	Cebpd	protein_coding	112.452	11.0251	0.0980422	-3.35045	61.7386	4.49e-25	1.11e-23
dHC enriched	ENSRNOG00000011566	4	153217782	153322564	+	Cecr2	protein_coding	169.521	41.3042	0.243652	-2.03711	105.413	6.7e-22	1.42e-20
dHC enriched	ENSRNOG00000020875	2	195719543	195730274	+	Celf3	protein_coding	1040.81	930.041	0.893574	-0.162341	985.425	0.027569	0.0774941
dHC enriched	ENSRNOG00000009339	2	240396152	240454747	+	Cenpe	protein_coding	27.2608	13.8424	0.507779	-0.977728	20.5516	0.0297586	0.0825428
dHC enriched	ENSRNOG00000025000	5	171262278	171294559	+	Cep104	protein_coding	801.844	686.123	0.855682	-0.224854	743.984	0.00860182	0.0287005
dHC enriched	ENSRNOG00000010566	16	37177443	37196784	+	Cep44	protein_coding	112.026	78.35	0.699392	-0.515827	95.188	0.00754891	0.025701
dHC enriched	ENSRNOG00000014041	1	233186989	233214758	-	Cep78	protein_coding	105.553	76.9952	0.729444	-0.45513	91.2742	0.0206511	0.0607488
dHC enriched	ENSRNOG00000001609	11	47146308	47174713	+	Cep97	protein_coding	151.763	110.803	0.730104	-0.453825	131.283	0.00827867	0.0277895
dHC enriched	ENSRNOG00000026604	3	8430829	8444851	+	Cercam	protein_coding	57.0777	36.7638	0.644101	-0.634641	46.9208	0.0248726	0.0709386
dHC enriched	ENSRNOG00000021138	2	196487656	196496986	+	Cers2	protein_coding	460.294	280.53	0.609459	-0.714399	370.412	1.04e-09	9.85e-09
dHC enriched	ENSRNOG00000042179	19	10024947	10038784	+	Cfap20	protein_coding	421.054	327.319	0.77738	-0.363309	374.187	0.00165083	0.00669834
dHC enriched	ENSRNOG00000036585	1	267511523	267598639	-	Cfap43	protein_coding	28.3932	7.13267	0.251211	-1.99303	17.7629	5.32e-05	0.00028696
dHC enriched	ENSRNOG00000030715	13	56978607	57080622	-	Cfh	protein_coding	273.024	218.38	0.799857	-0.322186	245.702	0.0244905	0.0700776
dHC enriched	ENSRNOG00000028356	20	13665031	13667333	-	Chchd10	protein_coding	1359.86	1209.64	0.889534	-0.168879	1284.75	0.0115215	0.0369581
dHC enriched	ENSRNOG00000028356	20	13665031	13667333	-	Chchd10	protein_coding	1359.86	1209.64	0.889534	-0.168879	1284.75	0.0115215	0.0369581
dHC enriched	ENSRNOG00000013211	4	60080538	60358562	-	Chchd3	protein_coding	559.749	454.09	0.811239	-0.301801	506.919	0.00287697	0.0109648
dHC enriched	ENSRNOG00000018309	4	157612536	157645659	+	Chd4	protein_coding	2653.03	2072.62	0.781228	-0.356185	2362.82	4.31e-09	3.88e-08
dHC enriched	ENSRNOG00000006689	5	21830882	21950696	+	Chd7	protein_coding	224.891	115.627	0.514145	-0.959753	170.259	8.84e-10	8.48e-09
dHC enriched	ENSRNOG00000037430	12	52562597	52596076	-	Chfr	protein_coding	306.992	240.618	0.783795	-0.351453	273.805	0.00525014	0.0187
dHC enriched	ENSRNOG00000021269	3	125428260	125441594	+	Chgb	protein_coding	6339.91	3850.76	0.607385	-0.719317	5095.34	5.28e-25	1.3e-23
dHC enriched	ENSRNOG00000053272	13	51022681	51030802	+	Chi3l1	protein_coding	1183.87	591.955	0.500017	-0.999951	887.912	2.12e-31	7.05e-30
dHC enriched	ENSRNOG00000008672	5	57267312	57284448	+	Chmp5	protein_coding	692.969	602.202	0.869018	-0.202542	647.586	0.0254576	0.0722679
dHC enriched	ENSRNOG00000017939	3	60513077	60611924	-	Chn1	protein_coding	12098	8157.02	0.674244	-0.568657	10127.5	8.14e-36	3.05e-34
dHC enriched	ENSRNOG00000058271	7	29043916	29070928	-	Chpt1	protein_coding	233.975	151.574	0.647821	-0.626332	192.775	1.23e-05	7.23e-05
dHC enriched	ENSRNOG00000001750	11	83858503	83867203	-	Chrd	protein_coding	399.915	210.553	0.526493	-0.925513	305.234	2.18e-15	3.14e-14
dHC enriched	ENSRNOG00000049410	17	63990599	63994169	-	Chrm3	protein_coding	860.297	631.344	0.733868	-0.446407	745.821	5.17e-07	3.68e-06
dHC enriched	ENSRNOG00000006397	3	103966451	104018861	-	Chrm5	protein_coding	62.9564	3.93346	0.0624791	-4.00048	33.4449	1.69e-19	3.18e-18
dHC enriched	ENSRNOG00000017424	15	42808897	42825179	+	Chrna2	protein_coding	65.0446	15.2365	0.234247	-2.0939	40.1405	1.25e-10	1.28e-09
dHC enriched	ENSRNOG00000010853	1	123899657	124039196	-	Chrna7	protein_coding	405.946	329.649	0.81205	-0.30036	367.797	0.0124442	0.0395181
dHC enriched	ENSRNOG00000007989	3	81498022	81512807	+	Chst1	protein_coding	2717.24	1771.42	0.651921	-0.617232	2244.33	4.78e-21	9.68e-20
dHC enriched	ENSRNOG00000008885	7	26645422	26859716	-	Chst11	protein_coding	303.471	166.116	0.547385	-0.869373	234.794	2.89e-11	3.14e-10
dHC enriched	ENSRNOG00000016267	1	204245645	204322544	-	Chst15	protein_coding	344.867	234.265	0.679291	-0.557899	289.566	4.93e-06	3.06e-05
dHC enriched	ENSRNOG00000000572	20	29731816	29738506	-	Chst3	protein_coding	50.943	29.1397	0.572005	-0.805901	40.0413	0.0121397	0.0386527
dHC enriched	ENSRNOG00000004258	X	2623024	2657155	-	Chst7	protein_coding	129.771	48.8265	0.376253	-1.41023	89.2986	1.98e-11	2.18e-10
dHC enriched	ENSRNOG00000015867	18	6834365	7081356	-	Chst9	protein_coding	106.028	2.57662	0.0243012	-5.36283	54.3026	7.89e-34	2.8e-32
dHC enriched	ENSRNOG00000047246	19	39077580	39087880	-	Chtf8	protein_coding	639.218	532.783	0.833491	-0.262761	586.001	0.00448638	0.0162707
dHC enriched	ENSRNOG00000033498	1	142014958	142020525	-	Cib1	protein_coding	117.917	70.6378	0.599048	-0.739256	94.2772	0.00029911	0.00141845
dHC enriched	ENSRNOG00000059834	8	59123079	59139946	-	Cib2	protein_coding	280.551	221.748	0.790402	-0.339341	251.149	0.00586373	0.0206208
dHC enriched	ENSRNOG00000020622	16	21288876	21295869	+	Cilp2	protein_coding	41.0426	10.0617	0.245153	-2.02824	25.5522	1.77e-06	1.17e-05
dHC enriched	ENSRNOG00000056940	1	12823363	12825786	+	Cited2	protein_coding	296.014	207.14	0.699764	-0.515061	251.577	0.00011924	0.00060641
dHC enriched	ENSRNOG00000060831	2	250897969	250923744	-	Clca1	protein_coding	51.6007	23.9962	0.465037	-1.10458	37.7985	0.00071714	0.00313864
dHC enriched	ENSRNOG00000018752	1	219468675	219472654	+	Clcf1	protein_coding	27.7285	0.636322	0.0229483	-5.44547	14.1824	4.16e-11	4.47e-10
dHC enriched	ENSRNOG00000010682	16	32449116	32519148	+	Clcn3	protein_coding	1517.32	1351.59	0.890775	-0.166867	1434.46	0.0232947	0.067249
dHC enriched	ENSRNOG00000003533	X	25016401	25080410	+	Clcn4	protein_coding	1502.4	1231	0.819354	-0.28744	1366.7	0.00038176	0.00177178
dHC enriched	ENSRNOG00000001926	11	77815181	77830416	+	Cldn1	protein_coding	17.5188	6.82334	0.389486	-1.36036	12.1711	0.015018	0.0464337
dHC enriched	ENSRNOG00000010085	15	104026601	104115748	+	Cldn10	protein_coding	340.639	214.421	0.629467	-0.667796	277.53	3.37e-08	2.75e-07
dHC enriched	ENSRNOG00000010263	2	115823538	115836846	-	Cldn11	protein_coding	1645.67	1018.85	0.619112	-0.691728	1332.26	0.0267344	0.0753518
dHC enriched	ENSRNOG00000039862	4	25686392	25692547	+	Cldn12	protein_coding	478.193	412.471	0.86256	-0.213303	445.332	0.0343278	0.0931437
dHC enriched	ENSRNOG00000007922	5	138300107	138305683	+	Cldn19	protein_coding	17.007	7.10722	0.4179	-1.25877	12.0571	0.0275318	0.0774021
dHC enriched	ENSRNOG00000003654	10	13003011	13004441	-	Cldn9	protein_coding	54.1486	1.96379	0.0362666	-4.78521	28.0562	4.26e-19	7.81e-18
dHC enriched	ENSRNOG00000060460	4	163191503	163214678	-	Clec1a	protein_coding	48.9151	18.191	0.37189	-1.42705	33.553	5.15e-05	0.00027789
dHC enriched	ENSRNOG00000003755	19	24545318	24576798	+	Clgn	protein_coding	91.4647	30.984	0.338754	-1.56169	61.2243	8.18e-10	7.9e-09
dHC enriched	ENSRNOG00000018109	5	153568745	153625869	-	Clic4	protein_coding	221.927	134.687	0.606897	-0.720475	178.307	1.91e-05	0.00010958
dHC enriched	ENSRNOG00000008806	6	23222021	23316962	-	Clip4	protein_coding	245.856	146.345	0.595245	-0.748443	196.1	2.95e-07	2.16e-06
dHC enriched	ENSRNOG00000011044	6	128473570	128567198	-	Clmn	protein_coding	801.105	480.604	0.599927	-0.737142	640.855	2.36e-15	3.39e-14
dHC enriched	ENSRNOG00000053239	8	44847157	44975457	+	Clmp	protein_coding	980.524	197.669	0.201596	-2.31046	589.097	4.11e-110	9.3e-108
dHC enriched	ENSRNOG00000019103	1	197986385	197997664	-	Cln3	protein_coding	156.864	121.929	0.777294	-0.363468	139.397	0.0234104	0.067515
dHC enriched	ENSRNOG00000047052	9	10048886	10054359	-	Clpp	protein_coding	242.194	174.871	0.722031	-0.469868	208.533	0.00049662	0.00225559
dHC enriched	ENSRNOG00000043085	8	105323837	105462168	-	Clstn2	protein_coding	2267.22	991.49	0.437314	-1.19326	1629.36	1.89e-39	8.25e-38
dHC enriched	ENSRNOG00000016460	15	42640146	42665857	+	Clu	protein_coding	10139.6	7169.16	0.707047	-0.500123	8654.38	3.87e-15	5.48e-14
dHC enriched	ENSRNOG00000000704	12	48789261	48793553	+	Cmklr1	protein_coding	39.0425	22.3124	0.57149	-0.807201	30.6775	0.028237	0.0790619
dHC enriched	ENSRNOG00000016828	15	33600102	33602834	+	Cmtm5	protein_coding	529.178	243.197	0.459574	-1.12163	386.188	4.13e-25	1.02e-23
dHC enriched	ENSRNOG00000010951	8	122789453	122807560	+	Cmtm6	protein_coding	141.832	93.0266	0.655892	-0.608471	117.429	0.00059995	0.00267357
dHC enriched	ENSRNOG00000015591	18	81521968	81539065	-	Cndp2	protein_coding	906.417	724.845	0.799682	-0.322503	815.631	4.38e-05	0.00023886
dHC enriched	ENSRNOG00000009811	15	23568555	23580395	-	Cnih1	protein_coding	520.917	430.354	0.826148	-0.275528	475.636	0.00390819	0.0143973
dHC enriched	ENSRNOG00000020247	1	220474493	220480132	-	Cnih2	protein_coding	5306.15	1637.61	0.308625	-1.69607	3471.88	9.92e-170	6.57e-167
dHC enriched	ENSRNOG00000007014	X	39711201	39951847	+	Cnksr2	protein_coding	2635.18	2320.02	0.8804	-0.183769	2477.6	0.00446053	0.0161996
dHC enriched	ENSRNOG00000018052	1	43789791	43884267	-	Cnksr3	protein_coding	104.848	70.4282	0.671719	-0.57407	87.638	0.00816063	0.0274517
dHC enriched	ENSRNOG00000011559	2	225005019	225036188	+	Cnn3	protein_coding	1428.15	731.499	0.5122	-0.965222	1079.83	5.44e-31	1.78e-29
dHC enriched	ENSRNOG00000016302	1	263186235	263242468	+	Cnnm1	protein_coding	1370.75	864.405	0.630606	-0.66519	1117.58	5.61e-20	1.08e-18
dHC enriched	ENSRNOG00000017496	10	88490798	88497356	+	Cnp	protein_coding	4555.23	2702.53	0.593282	-0.75321	3628.88	0.00112887	0.0047392
dHC enriched	ENSRNOG00000008223	5	49311030	49333056	+	Cnr1	protein_coding	3342.59	2935.59	0.87824	-0.187313	3139.09	0.00329826	0.0123811
dHC enriched	ENSRNOG00000047307	5	58041146	58078545	-	Cntfr	protein_coding	682.857	527.383	0.772318	-0.372734	605.12	4.89e-05	0.00026446
dHC enriched	ENSRNOG00000009033	13	49285310	49313940	-	Cntn2	protein_coding	1096.88	919.207	0.838019	-0.254945	1008.04	0.00586852	0.0206334
dHC enriched	ENSRNOG00000023148	2	216863428	217056523	+	Col11a1	protein_coding	162.364	83.2311	0.512622	-0.964033	122.797	5.04e-08	4.03e-07
dHC enriched	ENSRNOG00000000463	20	3830164	3859018	+	Col11a2	protein_coding	1022.41	491.449	0.480676	-1.05686	756.931	4.04e-26	1.06e-24
dHC enriched	ENSRNOG00000058470	8	87040799	87158368	-	Col12a1	protein_coding	170.391	49.8917	0.292807	-1.77198	110.142	2.84e-16	4.32e-15
dHC enriched	ENSRNOG00000031475	5	148257642	148311645	+	Col16a1	protein_coding	256.365	119.092	0.464542	-1.10612	187.729	1.02e-10	1.05e-09
dHC enriched	ENSRNOG00000001229	20	12225202	12332858	+	Col18a1	protein_coding	116.025	38.6669	0.333264	-1.58526	77.346	3.24e-12	3.79e-11
dHC enriched	ENSRNOG00000003897	10	82745801	82762789	+	Col1a1	protein_coding	97.1756	28.3056	0.291283	-1.77951	62.7406	3.43e-12	4e-11
dHC enriched	ENSRNOG00000050706	2	235596123	235715057	+	Col25a1	protein_coding	442.664	204.886	0.462849	-1.11139	323.775	4.35e-20	8.4e-19
dHC enriched	ENSRNOG00000016281	16	83522162	83632153	+	Col4a1	protein_coding	441.46	303.186	0.686779	-0.542081	372.323	1.11e-05	6.6e-05
dHC enriched	ENSRNOG00000023972	16	83387364	83438561	-	Col4a2	protein_coding	636.651	411.752	0.646748	-0.628726	524.201	0.00548834	0.0194278
dHC enriched	ENSRNOG00000018951	X	112769645	112983685	+	Col4a5	protein_coding	152.707	80.8895	0.529703	-0.916744	116.798	7.39e-07	5.15e-06
dHC enriched	ENSRNOG00000003736	9	52092511	52238564	-	Col5a2	protein_coding	282.715	169.697	0.60024	-0.736388	226.206	1.57e-05	9.14e-05
dHC enriched	ENSRNOG00000020525	8	21786324	21831668	-	Col5a3	protein_coding	251.068	177.706	0.707801	-0.498583	214.387	0.00047164	0.00215177
dHC enriched	ENSRNOG00000010663	8	114529016	114617466	-	Col6a5	protein_coding	24.3886	2.54725	0.104444	-3.25919	13.4679	2.66e-07	1.96e-06
dHC enriched	ENSRNOG00000010841	5	144308611	144335172	+	Col8a2	protein_coding	21.0414	2.63145	0.12506	-2.99931	11.8364	7.04e-06	4.28e-05
dHC enriched	ENSRNOG00000011502	5	139963002	139979864	+	Col9a2	protein_coding	137.287	92.5018	0.673785	-0.56964	114.894	0.00131512	0.00544012
dHC enriched	ENSRNOG00000009531	3	176102351	176124306	+	Col9a3	protein_coding	147.011	57.3689	0.390236	-1.35758	102.19	5.85e-11	6.16e-10
dHC enriched	ENSRNOG00000016366	18	867048	1052606	+	Colec12	protein_coding	54.014	23.9669	0.443716	-1.17229	38.9904	0.0001071	0.00054889
dHC enriched	ENSRNOG00000043386	2	147774767	147779013	-	Commd2	protein_coding	153.38	114.961	0.749518	-0.415966	134.171	0.0174203	0.0526588
dHC enriched	ENSRNOG00000001889	11	86715981	86735622	+	Comt	protein_coding	438.879	317.641	0.723755	-0.466426	378.26	1.62e-05	9.41e-05
dHC enriched	ENSRNOG00000060723	8	106586689	106602837	+	Copb2	protein_coding	667.233	558.144	0.836505	-0.257553	612.688	0.00302478	0.0114646
dHC enriched	ENSRNOG00000011014	4	58064833	58195143	-	Copg2	protein_coding	1340.42	1199.23	0.894674	-0.160566	1269.82	0.0197644	0.058551
dHC enriched	ENSRNOG00000016190	19	10583857	10596851	-	Coq9	protein_coding	368.21	311.567	0.846168	-0.240983	339.889	0.0245825	0.0703243
dHC enriched	ENSRNOG00000019430	1	198123884	198128857	-	Coro1a	protein_coding	1170.62	1041.39	0.889601	-0.16877	1106.01	0.0238693	0.0686082
dHC enriched	ENSRNOG00000021828	1	219397850	219403260	+	Coro1b	protein_coding	951.239	799.3	0.840273	-0.251071	875.27	0.00164357	0.00667202
dHC enriched	ENSRNOG00000004146	10	11090314	11143881	+	Coro7	protein_coding	1157.04	489.119	0.422732	-1.24218	823.081	2.13e-46	1.2e-44
dHC enriched	ENSRNOG00000046980	10	11373346	11386059	+	Coro7	protein_coding	133.314	55.9006	0.419315	-1.25389	94.6073	7.54e-10	7.3e-09
dHC enriched	ENSRNOG00000016257	19	52465087	52499433	-	Cotl1	protein_coding	1474.34	417.178	0.282959	-1.82133	945.757	5.18e-97	9.19e-95
dHC enriched	ENSRNOG00000004553	13	96219853	96224023	+	Cox20	protein_coding	334.042	259.037	0.775461	-0.366874	296.539	0.00202301	0.00803968
dHC enriched	ENSRNOG00000021177	1	222466575	222468896	-	Cox8a	protein_coding	2001.16	1743.6	0.871295	-0.198767	1872.38	0.00163297	0.0066384
dHC enriched	ENSRNOG00000011913	2	104744461	104799853	+	Cp	protein_coding	69.9547	38.986	0.557304	-0.843464	54.4704	0.00154006	0.00629792
dHC enriched	ENSRNOG00000003873	10	63325199	63389817	+	Cpd	protein_coding	1333.4	757.679	0.568231	-0.81545	1045.54	2.97e-24	7.01e-23
dHC enriched	ENSRNOG00000043387	16	26906716	27014813	+	Cpe	protein_coding	20178.2	13284.9	0.658381	-0.603005	16731.6	4.15e-40	1.87e-38
dHC enriched	ENSRNOG00000019161	1	143171264	143278485	-	Cpeb1	protein_coding	503.93	414.004	0.821551	-0.283578	458.967	0.00601732	0.0210919
dHC enriched	ENSRNOG00000000105	17	10756285	10818835	-	Cplx2	protein_coding	10612.8	3729.66	0.351432	-1.50868	7171.21	9.58e-148	4.34e-145
dHC enriched	ENSRNOG00000034134	7	60654350	60714620	+	Cpm	protein_coding	630.076	148.631	0.235894	-2.08379	389.354	2.19e-47	1.28e-45
dHC enriched	ENSRNOG00000026577	8	113105814	113586418	+	Cpne4	protein_coding	2730.82	840.148	0.307654	-1.70062	1785.48	6.49e-93	1.08e-90
dHC enriched	ENSRNOG00000018399	15	34187223	34194118	+	Cpne6	protein_coding	4195.71	1610.47	0.383837	-1.38143	2903.09	2.29e-134	8.4e-132
dHC enriched	ENSRNOG00000015397	19	55929609	55946250	+	Cpne7	protein_coding	746.087	338.26	0.453378	-1.14121	542.173	1.29e-32	4.47e-31
dHC enriched	ENSRNOG00000005931	7	71709157	72167417	+	Cpq	protein_coding	310.965	160.982	0.517685	-0.949855	235.974	2.79e-12	3.28e-11
dHC enriched	ENSRNOG00000014254	1	218569510	218629678	+	Cpt1a	protein_coding	454.025	256.748	0.565492	-0.822421	355.386	1.71e-13	2.2e-12
dHC enriched	ENSRNOG00000026163	1	100955095	100969560	-	Cpt1c	protein_coding	1050.35	926.095	0.881697	-0.181644	988.225	0.0108574	0.0350961
dHC enriched	ENSRNOG00000021220	3	122913886	122920684	-	Cpxm1	protein_coding	78.1992	45.3767	0.580271	-0.785202	61.788	0.00119783	0.00499459
dHC enriched	ENSRNOG00000008193	13	113824892	113872097	-	Cr1l	protein_coding	268.418	214.241	0.798162	-0.325246	241.33	0.0117935	0.037718
dHC enriched	ENSRNOG00000010903	13	56270781	56462834	-	Crb1	protein_coding	19.7111	3.52228	0.178695	-2.48443	11.6167	0.00010947	0.00056007
dHC enriched	ENSRNOG00000005413	3	80892435	80933283	-	Creb3l1	protein_coding	119.626	24.1157	0.201593	-2.31048	71.8706	4.42e-19	8.08e-18
dHC enriched	ENSRNOG00000027990	6	137959171	137967042	+	Crip1	protein_coding	43.2093	23.7848	0.550454	-0.861306	33.4971	0.0122956	0.0390842
dHC enriched	ENSRNOG00000016752	19	52647070	52705131	+	Crispld2	protein_coding	74.8602	32.3135	0.431651	-1.21206	53.5868	8.59e-06	5.16e-05
dHC enriched	ENSRNOG00000020030	16	20675042	20686317	-	Crlf1	protein_coding	425.389	105.266	0.247457	-2.01475	265.327	1.68e-43	8.64e-42
dHC enriched	ENSRNOG00000006779	4	22081604	22116265	+	Crot	protein_coding	340.155	229.631	0.675076	-0.566879	284.893	2.44e-06	1.58e-05
dHC enriched	ENSRNOG00000022421	16	20740826	20794039	+	Crtc1	protein_coding	1194.31	899.566	0.753207	-0.408882	1046.94	2.23e-07	1.66e-06
dHC enriched	ENSRNOG00000010524	8	55178289	55182545	+	Cryab	protein_coding	289.448	151.588	0.523713	-0.933151	220.518	2.43e-09	2.24e-08
dHC enriched	ENSRNOG00000001687	11	42945084	43005097	+	Crybg3	protein_coding	106.905	72.9188	0.682093	-0.551961	89.9116	0.00583071	0.0205214
dHC enriched	ENSRNOG00000008989	15	37543727	37663584	-	Cryl1	protein_coding	217.823	153.659	0.705433	-0.503418	185.741	0.00087668	0.00377604
dHC enriched	ENSRNOG00000011573	7	143781702	143793970	-	Csad	protein_coding	266.511	211.41	0.79325	-0.334152	238.961	0.0121348	0.0386445
dHC enriched	ENSRNOG00000005332	7	123168811	123183335	+	Csdc2	protein_coding	715.421	455.649	0.636896	-0.650871	585.535	1.68e-11	1.86e-10
dHC enriched	ENSRNOG00000018659	2	210522375	210550560	-	Csf1	protein_coding	151.296	97.4163	0.64388	-0.635137	124.356	0.00055937	0.00250618
dHC enriched	ENSRNOG00000018414	18	56414488	56458300	+	Csf1r	protein_coding	1003.91	752.04	0.749108	-0.416755	877.977	5.14e-06	3.18e-05
dHC enriched	ENSRNOG00000017106	18	56887354	56918345	+	Csnk1a1	protein_coding	2160.33	1955.82	0.905335	-0.143476	2058.08	0.0227942	0.0660146
dHC enriched	ENSRNOG00000017208	8	61532465	61567510	+	Cspg4	protein_coding	309.16	226.259	0.73185	-0.45038	267.71	0.00073699	0.00321485
dHC enriched	ENSRNOG00000008937	13	52553775	52575051	+	Csrp1	protein_coding	2414.49	1273.88	0.527596	-0.922495	1844.19	1.21e-07	9.32e-07
dHC enriched	ENSRNOG00000005195	3	143219686	143223615	-	Cst3	protein_coding	13355.1	8505.48	0.636872	-0.650924	10930.3	5.93e-22	1.26e-20
dHC enriched	ENSRNOG00000020455	1	220727292	220729000	-	Cst6	protein_coding	455.728	139.37	0.305819	-1.70925	297.549	2.03e-39	8.84e-38
dHC enriched	ENSRNOG00000015573	2	252305874	252320387	+	Ctbs	protein_coding	85.6752	48.8559	0.570246	-0.810344	67.2656	0.00042155	0.00193921
dHC enriched	ENSRNOG00000017674	19	37600148	37649673	+	Ctcf	protein_coding	603.273	526.566	0.872849	-0.196195	564.92	0.0319753	0.0876455
dHC enriched	ENSRNOG00000017352	10	56591292	56600232	+	Ctdnep1	protein_coding	695.019	616.327	0.886777	-0.173356	655.673	0.0366103	0.0982213
dHC enriched	ENSRNOG00000015295	9	81672758	81677979	+	Ctdsp1	protein_coding	400.926	229.301	0.57193	-0.806089	315.114	4.19e-11	4.5e-10
dHC enriched	ENSRNOG00000047598	7	70283710	70288568	+	Ctdsp2	protein_coding	238.5	145.955	0.61197	-0.708467	192.228	8.72e-07	6.01e-06
dHC enriched	ENSRNOG00000012021	3	154212202	154373169	+	Ctnnbl1	protein_coding	327.205	226.578	0.692465	-0.530187	276.892	7.2e-06	4.37e-05
dHC enriched	ENSRNOG00000028688	10	59749721	59764819	-	Ctns	protein_coding	100.929	71.603	0.70944	-0.495248	86.266	0.0155237	0.0477481
dHC enriched	ENSRNOG00000009963	5	139475934	139505065	-	Ctps1	protein_coding	1044.41	791.684	0.75802	-0.399692	918.048	6.17e-08	4.88e-07
dHC enriched	ENSRNOG00000016496	1	151918571	151949983	+	Ctsc	protein_coding	41.8136	19.3717	0.463286	-1.11003	30.5927	0.00121356	0.00505404
dHC enriched	ENSRNOG00000014064	8	97439161	97458287	+	Ctsh	protein_coding	453.427	254.261	0.560755	-0.834559	353.844	1.25e-13	1.62e-12
dHC enriched	ENSRNOG00000018566	17	1872848	1879279	-	Ctsl	protein_coding	936.882	695.86	0.74274	-0.429071	816.371	1.88e-07	1.41e-06
dHC enriched	ENSRNOG00000021157	2	197655786	197679458	+	Ctss	protein_coding	1100.92	898.725	0.816341	-0.292756	999.822	0.00373783	0.0138438
dHC enriched	ENSRNOG00000061845	4	42932903	43096399	-	Cttnbp2	protein_coding	2868.95	1986.51	0.692416	-0.530288	2427.73	9.2e-14	1.21e-12
dHC enriched	ENSRNOG00000019649	16	81719028	81756654	-	Cul4a	protein_coding	830.472	632.619	0.761758	-0.392595	731.546	9.98e-07	6.82e-06
dHC enriched	ENSRNOG00000011984	17	9109731	9117750	+	Cxcl14	protein_coding	735.82	401.702	0.545925	-0.873227	568.761	5.04e-17	8.05e-16
dHC enriched	ENSRNOG00000026647	10	57060007	57064600	-	Cxcl16	protein_coding	43.7264	11.1876	0.255854	-1.96661	27.457	6.85e-07	4.79e-06
dHC enriched	ENSRNOG00000048239	9	81466332	81469274	-	Cxcr1	protein_coding	24.5031	0.980912	0.0400322	-4.6427	12.742	9.41e-10	9e-09
dHC enriched	ENSRNOG00000003866	13	45314933	45318878	-	Cxcr4	protein_coding	43.7194	19.6653	0.449807	-1.15262	31.6923	0.00175755	0.0070879
dHC enriched	ENSRNOG00000015205	18	81694808	81726821	+	Cyb5a	protein_coding	389.844	227.765	0.584245	-0.775354	308.804	3.71e-11	4e-10
dHC enriched	ENSRNOG00000019751	1	171971701	171979933	-	Cyb5r2	protein_coding	41.3441	24.1666	0.584523	-0.774669	32.7553	0.0172252	0.0521515
dHC enriched	ENSRNOG00000009620	3	57718364	57746097	+	Cybrd1	protein_coding	18.6202	7.33436	0.393894	-1.34412	12.9773	0.0177871	0.0536264
dHC enriched	ENSRNOG00000024457	3	62818502	63211845	-	Cyct	protein_coding	77.5424	46.6904	0.602128	-0.731859	62.1164	0.00889989	0.0295632
dHC enriched	ENSRNOG00000024457	3	62818502	63211845	-	Cyct	protein_coding	77.5424	46.6904	0.602128	-0.731859	62.1164	0.00889989	0.0295632
dHC enriched	ENSRNOG00000011945	1	114258719	114347137	+	Cyfip1	protein_coding	1294.23	710.928	0.549308	-0.864313	1002.58	1.5e-25	3.79e-24
dHC enriched	ENSRNOG00000040287	6	2307808	2316722	-	Cyp1b1	protein_coding	51.0466	7.23257	0.141686	-2.81923	29.1396	7.46e-11	7.8e-10
dHC enriched	ENSRNOG00000017188	9	81968332	81998169	+	Cyp27a1	protein_coding	55.1464	26.4554	0.47973	-1.0597	40.8009	0.00164468	0.00667496
dHC enriched	ENSRNOG00000029179	7	123625590	123638765	-	Cyp2d3	protein_coding	29.7037	14.0187	0.471951	-1.08329	21.8612	0.00704808	0.0241777
dHC enriched	ENSRNOG00000029179	7	123625590	123638765	-	Cyp2d3	protein_coding	29.7037	14.0187	0.471951	-1.08329	21.8612	0.00704808	0.0241777
dHC enriched	ENSRNOG00000032261	7	123599266	123608436	-	Cyp2d4	protein_coding	240.256	100.919	0.420048	-1.25137	170.587	1.57e-16	2.44e-15
dHC enriched	ENSRNOG00000042224	5	115021723	115222084	-	Cyp2j10	protein_coding	214.127	100.056	0.467271	-1.09767	157.091	1.93e-11	2.13e-10
dHC enriched	ENSRNOG00000042224	5	115021723	115222084	-	Cyp2j10	protein_coding	214.127	100.056	0.467271	-1.09767	157.091	1.93e-11	2.13e-10
dHC enriched	ENSRNOG00000028891	1	83965608	83969559	+	Cyp2t1	protein_coding	47.1862	29.3746	0.622526	-0.683795	38.2804	0.0225314	0.0653234
dHC enriched	ENSRNOG00000011053	2	236414135	236431683	-	Cyp2u1	protein_coding	84.4335	45.4276	0.538029	-0.894245	64.9306	0.00018053	0.00089125
dHC enriched	ENSRNOG00000046643	12	19074583	19114399	-	Cyp3a9	protein_coding	55.2718	20.1156	0.36394	-1.45823	37.6937	1.15e-05	6.8e-05
dHC enriched	ENSRNOG00000055078	5	134508730	134526089	-	Cyp4b1	protein_coding	21.9308	5.17281	0.23587	-2.08394	13.5518	0.00016333	0.00081125
dHC enriched	ENSRNOG00000004786	7	15179467	15190796	-	Cyp4f1	protein_coding	64.2039	36.0903	0.562121	-0.831048	50.1471	0.0022888	0.008939
dHC enriched	ENSRNOG00000043233	7	15198940	15225410	-	Cyp4f6	protein_coding	88.0965	47.3209	0.537149	-0.896606	67.7087	0.00010353	0.00053124
dHC enriched	ENSRNOG00000042426	16	50111306	50136727	+	Cyp4v3	protein_coding	110.668	66.3616	0.599645	-0.73782	88.5149	0.00042244	0.00194173
dHC enriched	ENSRNOG00000009730	2	102701903	102871257	-	Cyp7b1	protein_coding	461.493	153.953	0.333598	-1.58382	307.723	3.17e-37	1.25e-35
dHC enriched	ENSRNOG00000043381	10	107197989	107281235	-	Cyth1	protein_coding	621.629	413.111	0.664562	-0.589524	517.37	2.75e-09	2.53e-08
dHC enriched	ENSRNOG00000001065	12	12877559	12945192	-	Cyth3	protein_coding	608.371	484.066	0.795676	-0.329747	546.218	0.00028296	0.0013482
dHC enriched	ENSRNOG00000019012	9	100956477	100974551	+	D2hgdh	protein_coding	314.991	247.485	0.785688	-0.347972	281.238	0.00643981	0.0223181
dHC enriched	ENSRNOG00000004345	6	94636222	94739026	+	Daam1	protein_coding	852.182	630.53	0.7399	-0.434597	741.356	2.26e-06	1.47e-05
dHC enriched	ENSRNOG00000053945	9	13446896	13490669	+	Daam2	protein_coding	454.336	267.101	0.587893	-0.766374	360.718	4.69e-11	4.99e-10
dHC enriched	ENSRNOG00000007410	5	123905166	124280115	+	Dab1	protein_coding	900.116	668.635	0.742832	-0.428892	784.375	4.27e-08	3.44e-07
dHC enriched	ENSRNOG00000028930	2	55747318	55768270	+	Dab2	protein_coding	124.25	64.8228	0.521712	-0.938674	94.5364	3.85e-06	2.42e-05
dHC enriched	ENSRNOG00000019400	8	116980497	116993193	-	Dag1	protein_coding	1737.33	1336.74	0.769422	-0.378152	1537.04	4.6e-08	3.69e-07
dHC enriched	ENSRNOG00000027264	1	226297016	226353611	-	Dagla	protein_coding	3338.74	1295.32	0.387968	-1.36599	2317.03	2.62e-76	3.22e-74
dHC enriched	ENSRNOG00000018198	17	4297224	4454778	-	Dapk1	protein_coding	1307.45	1103.99	0.844388	-0.244022	1205.72	0.00043233	0.00198403
dHC enriched	ENSRNOG00000003743	13	45074072	45127815	-	Dars	protein_coding	472.457	344.451	0.729062	-0.455886	408.454	2.21e-05	0.00012589
dHC enriched	ENSRNOG00000004628	7	142239035	142243241	+	Dazap2	protein_coding	907.116	784.375	0.864691	-0.209744	845.746	0.00880156	0.0292818
dHC enriched	ENSRNOG00000046889	13	36117119	36174908	-	Dbi	protein_coding	848.747	435.36	0.512945	-0.963124	642.054	1.55e-24	3.69e-23
dHC enriched	ENSRNOG00000014170	17	9679628	9693820	+	Dbn1	protein_coding	2802.89	2423.92	0.864794	-0.209572	2613.4	0.00012147	0.00061704
dHC enriched	ENSRNOG00000014571	3	160935709	160938467	+	Dbndd2	protein_coding	1016.74	852.111	0.838081	-0.254839	934.426	0.00206005	0.00816991
dHC enriched	ENSRNOG00000012378	14	86029335	86044364	+	Dbnl	protein_coding	869.627	762.022	0.876262	-0.190565	815.825	0.0190599	0.0568163
dHC enriched	ENSRNOG00000021682	10	91095545	91122018	-	Dcakd	protein_coding	536.12	214.006	0.399176	-1.3249	375.063	5.49e-30	1.71e-28
dHC enriched	ENSRNOG00000000407	20	33359196	33453766	+	Dcbld1	protein_coding	37.7159	18.8508	0.499811	-1.00054	28.2834	0.00529256	0.0188316
dHC enriched	ENSRNOG00000033099	18	66523120	67224566	-	Dcc	protein_coding	421.448	268.016	0.63594	-0.653038	344.732	6.38e-09	5.62e-08
dHC enriched	ENSRNOG00000008299	6	47774060	47848075	-	Dcdc2c	protein_coding	17.0755	6.50812	0.381138	-1.39161	11.7918	0.0121212	0.0386081
dHC enriched	ENSRNOG00000008299	6	47774060	47848075	-	Dcdc2c	protein_coding	17.0755	6.50812	0.381138	-1.39161	11.7918	0.0121212	0.0386081
dHC enriched	ENSRNOG00000031643	1	170594822	170628915	-	Dchs1	protein_coding	331.626	208.319	0.628173	-0.670767	269.972	7.87e-08	6.16e-07
dHC enriched	ENSRNOG00000016550	2	186116624	186245771	-	Dclk2	protein_coding	1400.84	822.51	0.587156	-0.768183	1111.67	2.19e-25	5.54e-24
dHC enriched	ENSRNOG00000004554	7	38742051	38782323	+	Dcn	protein_coding	75.3426	23.9845	0.318339	-1.65136	49.6635	7.77e-09	6.77e-08
dHC enriched	ENSRNOG00000058618	2	188688719	188704462	+	Dcst2	protein_coding	46.9716	24.1568	0.514286	-0.959358	35.5642	0.00414381	0.0151517
dHC enriched	ENSRNOG00000013215	16	47177145	47208110	-	Dctd	protein_coding	81.6171	20.3153	0.24891	-2.0063	50.9662	5.41e-12	6.25e-11
dHC enriched	ENSRNOG00000050315	10	109906815	109909715	-	Dcxr	protein_coding	72.8494	49.5744	0.680506	-0.555321	61.2119	0.0325331	0.0889971
dHC enriched	ENSRNOG00000000842	20	5049496	5052585	+	Ddah2	protein_coding	148.862	83.3701	0.560049	-0.836375	116.116	1.2e-05	7.06e-05
dHC enriched	ENSRNOG00000009481	15	19965187	20032191	-	Ddhd1	protein_coding	691.157	362.638	0.524682	-0.930484	526.898	1.03e-21	2.16e-20
dHC enriched	ENSRNOG00000006789	7	70580198	70585084	+	Ddit3	protein_coding	205.439	131.398	0.639596	-0.644766	168.418	2.08e-05	0.00011876
dHC enriched	ENSRNOG00000057078	20	29509289	29511382	-	Ddit4	protein_coding	499.087	258.044	0.517032	-0.951675	378.565	1.89e-16	2.92e-15
dHC enriched	ENSRNOG00000010047	2	242882306	242885131	+	Ddit4l	protein_coding	100.146	7.92175	0.0791024	-3.66014	54.0336	1.1e-26	2.97e-25
dHC enriched	ENSRNOG00000010047	2	242882306	242885131	+	Ddit4l	protein_coding	100.146	7.92175	0.0791024	-3.66014	54.0336	1.1e-26	2.97e-25
dHC enriched	ENSRNOG00000059605	7	140479711	140483693	-	Ddn	protein_coding	19926.5	10574.3	0.530666	-0.914124	15250.4	1.48e-40	6.81e-39
dHC enriched	ENSRNOG00000015079	5	156668712	156676035	+	Ddost	protein_coding	1168.37	1028.4	0.880204	-0.18409	1098.38	0.0155947	0.0479152
dHC enriched	ENSRNOG00000057125	20	3552929	3575780	+	Ddr1	protein_coding	1145.76	559.768	0.488555	-1.03341	852.765	1.06e-07	8.18e-07
dHC enriched	ENSRNOG00000001239	20	13827153	13829622	+	Ddt	protein_coding	521.704	422.049	0.808982	-0.305821	471.876	0.00197257	0.0078574
dHC enriched	ENSRNOG00000043099	20	32213148	32232632	-	Ddx21	protein_coding	454.496	328.916	0.723695	-0.466546	391.706	4.19e-06	2.62e-05
dHC enriched	ENSRNOG00000022368	16	20873642	20881439	+	Ddx49	protein_coding	563.473	275.902	0.489645	-1.03019	419.688	9.07e-21	1.82e-19
dHC enriched	ENSRNOG00000002612	10	71253598	71277277	+	Ddx52	protein_coding	149.147	116.065	0.778196	-0.361795	132.606	0.0307861	0.0848727
dHC enriched	ENSRNOG00000006384	5	56500734	56536772	-	Ddx58	protein_coding	31.0398	17.633	0.568078	-0.815839	24.3364	0.0350848	0.0948089
dHC enriched	ENSRNOG00000008236	5	29573898	29601748	-	Decr1	protein_coding	185.534	148.496	0.800375	-0.321253	167.015	0.0365017	0.0979758
dHC enriched	ENSRNOG00000003223	13	100666075	100672731	-	Degs1	protein_coding	711.022	606.471	0.852957	-0.229456	658.746	0.0106439	0.0344968
dHC enriched	ENSRNOG00000026748	4	67242271	67301102	-	Dennd2a	protein_coding	393.138	224.403	0.570799	-0.808946	308.771	3.13e-12	3.66e-11
dHC enriched	ENSRNOG00000012206	1	174524047	174588529	-	Dennd5a	protein_coding	4726.01	4058.87	0.858837	-0.219544	4392.44	0.00029098	0.00138372
dHC enriched	ENSRNOG00000005551	7	97737178	97759852	-	Derl1	protein_coding	876.871	613.518	0.699667	-0.51526	745.194	4.43e-10	4.35e-09
dHC enriched	ENSRNOG00000019810	9	82556573	82564294	+	Des	protein_coding	28.2683	15.356	0.543222	-0.880387	21.8121	0.0285016	0.0795822
dHC enriched	ENSRNOG00000005577	7	123238333	123259636	-	Desi1	protein_coding	799.641	501.826	0.627565	-0.672164	650.733	1.94e-14	2.65e-13
dHC enriched	ENSRNOG00000016573	1	164113459	164143818	-	Dgat2	protein_coding	916.023	434.358	0.474178	-1.0765	675.191	4.11e-26	1.08e-24
dHC enriched	ENSRNOG00000022943	7	3143827	3170146	-	Dgka	protein_coding	622.714	370.415	0.59484	-0.749428	496.564	5.63e-12	6.48e-11
dHC enriched	ENSRNOG00000030771	6	57516713	58277279	+	Dgkb	protein_coding	2141.25	1363.94	0.636984	-0.650672	1752.6	4.48e-23	1.01e-21
dHC enriched	ENSRNOG00000023238	9	94980409	95069714	+	Dgkd	protein_coding	1059.33	746.127	0.704338	-0.50566	902.729	1.81e-10	1.83e-09
dHC enriched	ENSRNOG00000001796	11	81972219	82163165	+	Dgkg	protein_coding	1800.72	705.851	0.391984	-1.35113	1253.28	1.65e-81	2.25e-79
dHC enriched	ENSRNOG00000010065	15	60803098	60959769	-	Dgkh	protein_coding	454.206	284.901	0.627249	-0.672889	369.553	5.5e-09	4.89e-08
dHC enriched	ENSRNOG00000017737	3	80844005	80875817	-	Dgkz	protein_coding	11707	6750.03	0.576579	-0.794409	9228.53	5.44e-58	4.14e-56
dHC enriched	ENSRNOG00000015063	19	42066351	42082012	+	Dhodh	protein_coding	100.447	72.4312	0.721089	-0.471751	86.4391	0.0340591	0.0925021
dHC enriched	ENSRNOG00000018239	15	34155504	34167072	+	Dhrs4	protein_coding	63.9116	29.314	0.458664	-1.12449	46.6128	0.0001131	0.00057758
dHC enriched	ENSRNOG00000005589	6	95522577	95541393	-	Dhrs7	protein_coding	324.085	267.769	0.826231	-0.275383	295.927	0.0161085	0.0493177
dHC enriched	ENSRNOG00000018119	1	205789442	205842428	-	Dhx32	protein_coding	354.042	260.395	0.735492	-0.443218	307.219	0.00012321	0.00062552
dHC enriched	ENSRNOG00000004549	10	74080590	74119032	-	Dhx40	protein_coding	404.964	287.477	0.709883	-0.494348	346.221	5.99e-06	3.67e-05
dHC enriched	ENSRNOG00000018247	10	88599680	88611105	-	Dhx58	protein_coding	33.9576	17.6369	0.519381	-0.945136	25.7973	0.00977912	0.0320627
dHC enriched	ENSRNOG00000019688	18	30972907	31071371	-	Diaph1	protein_coding	796.578	587.842	0.737959	-0.438388	692.21	2.09e-07	1.56e-06
dHC enriched	ENSRNOG00000057826	X	99852198	100057439	+	Diaph2	protein_coding	57.793	14.1107	0.24416	-2.0341	35.9519	2.49e-09	2.3e-08
dHC enriched	ENSRNOG00000033736	6	135938935	135939534	-	Diras3	protein_coding	17.5511	4.56978	0.260371	-1.94136	11.0604	0.00117416	0.00491017
dHC enriched	ENSRNOG00000033736	6	135938935	135939534	-	Diras3	protein_coding	17.5511	4.56978	0.260371	-1.94136	11.0604	0.00117416	0.00491017
dHC enriched	ENSRNOG00000002767	X	70596576	70648532	+	Dlg3	protein_coding	3046.03	2480.08	0.814202	-0.296542	2763.05	2.52e-07	1.87e-06
dHC enriched	ENSRNOG00000018526	10	56627411	56653599	+	Dlg4	protein_coding	8770.08	8032.28	0.915873	-0.12678	8401.18	0.0181665	0.0545787
dHC enriched	ENSRNOG00000005783	15	120372	228977	+	Dlg5	protein_coding	427.517	358.665	0.838949	-0.253345	393.091	0.0263062	0.0744067
dHC enriched	ENSRNOG00000059984	1	57318708	57327379	-	Dll1	protein_coding	94.8719	30.7354	0.323968	-1.62608	62.8036	1.46e-10	1.49e-09
dHC enriched	ENSRNOG00000051264	4	32333356	32381501	-	Dlx6as	antisense	94.7223	55.9436	0.590606	-0.759731	75.333	0.00051156	0.0023173
dHC enriched	ENSRNOG00000015085	1	79989019	79999364	+	Dmpk	protein_coding	244.233	190.351	0.779381	-0.3596	217.292	0.00923935	0.0305609
dHC enriched	ENSRNOG00000026914	16	7345978	7408265	-	Dnah1	protein_coding	22.133	6.41019	0.289621	-1.78776	14.2716	0.00217258	0.00854915
dHC enriched	ENSRNOG00000000542	20	9313271	9560682	+	Dnah8	protein_coding	96.5143	52.7227	0.546269	-0.872318	74.6185	0.00060586	0.00269688
dHC enriched	ENSRNOG00000004171	10	52351192	52710862	-	Dnah9	protein_coding	668.174	169.168	0.25318	-1.98177	418.671	2.86e-15	4.09e-14
dHC enriched	ENSRNOG00000013734	5	57947716	58017992	+	Dnai1	protein_coding	32.3079	17.0202	0.526811	-0.924643	24.664	0.0141701	0.0441691
dHC enriched	ENSRNOG00000012106	8	59278262	59294003	+	Dnaja4	protein_coding	1094.73	806.321	0.736546	-0.441152	950.527	4.07e-09	3.66e-08
dHC enriched	ENSRNOG00000017975	1	165515726	165530095	-	Dnajb13	protein_coding	301.268	51.27	0.170181	-2.55486	176.269	1.17e-48	7.06e-47
dHC enriched	ENSRNOG00000000130	5	58393233	58401870	+	Dnajb5	protein_coding	1573.66	1246.81	0.792296	-0.335889	1410.23	2.34e-06	1.52e-05
dHC enriched	ENSRNOG00000015583	7	120987452	121000272	-	Dnal4	protein_coding	391.352	249.828	0.638373	-0.647529	320.59	1.7e-08	1.43e-07
dHC enriched	ENSRNOG00000015583	7	120987452	121000272	-	Dnal4	protein_coding	391.352	249.828	0.638373	-0.647529	320.59	1.7e-08	1.43e-07
dHC enriched	ENSRNOG00000023830	19	26022849	26025532	+	Dnase2	protein_coding	99.1849	65.3709	0.659081	-0.601471	82.2779	0.00488616	0.0175673
dHC enriched	ENSRNOG00000007649	8	22458899	22540524	+	Dnm2	protein_coding	822.277	555.64	0.675733	-0.565475	688.958	7.37e-12	8.41e-11
dHC enriched	ENSRNOG00000060054	10	63928064	63952726	-	Doc2b	protein_coding	447.106	99.7265	0.223049	-2.16457	273.416	5.27e-48	3.13e-46
dHC enriched	ENSRNOG00000018683	1	206900617	207414843	+	Dock1	protein_coding	438.751	278.199	0.634069	-0.657289	358.475	8.71e-10	8.36e-09
dHC enriched	ENSRNOG00000053200	9	86312501	86571765	-	Dock10	protein_coding	1897.52	419.926	0.221303	-2.17591	1158.72	8.66e-148	4.02e-145
dHC enriched	ENSRNOG00000013321	X	122507374	122690465	+	Dock11	protein_coding	231.317	59.9632	0.259225	-1.94772	145.64	4.09e-28	1.18e-26
dHC enriched	ENSRNOG00000004823	6	60566196	60782556	+	Dock4	protein_coding	2396.14	1144.86	0.477792	-1.06555	1770.5	1.11e-52	7.39e-51
dHC enriched	ENSRNOG00000024703	15	44453308	44627765	-	Dock5	protein_coding	125.02	83.9144	0.671208	-0.575168	104.467	0.00793408	0.0268217
dHC enriched	ENSRNOG00000010652	8	22822412	22874645	-	Dock6	protein_coding	101.969	70.1639	0.688091	-0.539329	86.0665	0.00976277	0.0320152
dHC enriched	ENSRNOG00000008298	5	117596136	117780777	-	Dock7	protein_coding	578.96	468.403	0.809041	-0.305715	523.681	0.00204749	0.0081257
dHC enriched	ENSRNOG00000011969	15	107945664	108210826	-	Dock9	protein_coding	3190.9	1993.61	0.62478	-0.678579	2592.26	2.96e-24	7.01e-23
dHC enriched	ENSRNOG00000015679	19	10563423	10574093	+	Dok4	protein_coding	258.326	163.171	0.631648	-0.662808	210.748	3.84e-06	2.41e-05
dHC enriched	ENSRNOG00000009799	8	48657795	48664860	+	Dpagt1	protein_coding	349.553	295.158	0.844388	-0.244022	322.355	0.0275044	0.0773379
dHC enriched	ENSRNOG00000008086	6	106721349	106971250	-	Dpf3	protein_coding	71.0009	13.6702	0.192535	-2.37681	42.3355	2.4e-13	3.04e-12
dHC enriched	ENSRNOG00000003116	10	62019379	62032407	-	Dph1	protein_coding	421.16	227.579	0.540361	-0.888005	324.369	1.9e-14	2.59e-13
dHC enriched	ENSRNOG00000030547	4	4021008	4473307	-	Dpp6	protein_coding	4419.28	2667.9	0.603695	-0.728109	3543.59	1.37e-38	5.74e-37
dHC enriched	ENSRNOG00000019105	8	70522092	70573424	+	Dpp8	protein_coding	1624.37	1417.4	0.872586	-0.196631	1520.88	0.0128088	0.0404388
dHC enriched	ENSRNOG00000021573	1	92002927	92069160	-	Dpy19l3	protein_coding	2377.09	1040.21	0.437596	-1.19233	1708.65	1.73e-65	1.66e-63
dHC enriched	ENSRNOG00000017105	2	221823687	222694627	+	Dpyd	protein_coding	180.452	61.5197	0.340919	-1.5525	120.986	5.92e-15	8.29e-14
dHC enriched	ENSRNOG00000020527	1	220803796	220806433	-	Drap1	protein_coding	627.358	461.195	0.735139	-0.44391	544.277	3.4e-06	2.15e-05
dHC enriched	ENSRNOG00000016502	8	49737798	50055560	+	Dscaml1	protein_coding	1048	808.418	0.77139	-0.374467	928.21	1.36e-06	9.09e-06
dHC enriched	ENSRNOG00000000824	20	27703732	27782586	-	Dse	protein_coding	78.7306	53.8877	0.684458	-0.546967	66.3092	0.0254473	0.0722506
dHC enriched	ENSRNOG00000013928	17	27286796	27334379	-	Dsp	protein_coding	143.461	9.39997	0.065523	-3.93186	76.4303	7.45e-37	2.9e-35
dHC enriched	ENSRNOG00000016671	18	14471213	14657332	+	Dtna	protein_coding	752.729	659.026	0.875515	-0.191796	705.877	0.0207278	0.0609329
dHC enriched	ENSRNOG00000005129	7	70476729	70481796	-	Dtx3	protein_coding	1789.14	1590.49	0.888969	-0.169795	1689.82	0.00709968	0.0243305
dHC enriched	ENSRNOG00000024945	14	84150908	84157528	+	Dusp18	protein_coding	553.512	451.733	0.816121	-0.293145	502.623	0.00154958	0.00632931
dHC enriched	ENSRNOG00000008868	3	67849966	67862475	+	Dusp19	protein_coding	99.1475	70.9824	0.715927	-0.482115	85.0649	0.0215662	0.0629563
dHC enriched	ENSRNOG00000011921	16	61078175	61091169	-	Dusp4	protein_coding	402.824	121.642	0.301972	-1.72752	262.233	3.37e-41	1.61e-39
dHC enriched	ENSRNOG00000014061	1	274245184	274258595	+	Dusp5	protein_coding	98.6003	43.503	0.441205	-1.18048	71.0516	1.82e-07	1.37e-06
dHC enriched	ENSRNOG00000023896	7	41475163	41479392	+	Dusp6	protein_coding	425.992	282.263	0.662602	-0.593786	354.128	4.85e-07	3.46e-06
dHC enriched	ENSRNOG00000055185	X	157168144	157172068	-	Dusp9	protein_coding	44.163	16.1567	0.365843	-1.4507	30.1599	4.38e-05	0.0002389
dHC enriched	ENSRNOG00000025408	16	3754968	3765917	-	Duxbl1	protein_coding	48.5427	20.4641	0.421569	-1.24616	34.5034	0.00016752	0.00082986
dHC enriched	ENSRNOG00000001708	11	84051078	84068302	-	Dvl3	protein_coding	785.849	679.777	0.865023	-0.20919	732.813	0.0184499	0.055353
dHC enriched	ENSRNOG00000009700	4	30807879	31121090	+	Dync1i1	protein_coding	2372.27	2168.13	0.913948	-0.129816	2270.2	0.0334783	0.0912418
dHC enriched	ENSRNOG00000005151	6	7900972	7933796	+	Dync2li1	protein_coding	212.898	157.744	0.740936	-0.432578	185.321	0.002466	0.00955297
dHC enriched	ENSRNOG00000001715	11	83948230	83964055	-	Ece2	protein_coding	267.737	134.442	0.502144	-0.993828	201.09	8.38e-12	9.48e-11
dHC enriched	ENSRNOG00000020308	1	87009730	87016005	+	Ech1	protein_coding	441.407	310.612	0.703686	-0.506996	376.009	1.01e-06	6.92e-06
dHC enriched	ENSRNOG00000011622	1	30874418	30917882	-	Echdc1	protein_coding	260.796	202.609	0.776889	-0.36422	231.703	0.00593554	0.020835
dHC enriched	ENSRNOG00000029333	5	127770570	127789567	+	Echdc2	protein_coding	74.6182	41.6899	0.55871	-0.839828	58.1541	0.00074683	0.00325202
dHC enriched	ENSRNOG00000008843	10	13797562	13810913	+	Eci1	protein_coding	123.464	90.6105	0.733901	-0.446343	107.037	0.0158317	0.0485394
dHC enriched	ENSRNOG00000029549	17	30556884	30639040	+	Eci2	protein_coding	245.581	180.839	0.736373	-0.441491	213.21	0.00107193	0.00452222
dHC enriched	ENSRNOG00000029549	17	30556884	30639040	+	Eci2	protein_coding	245.581	180.839	0.736373	-0.441491	213.21	0.00107193	0.00452222
dHC enriched	ENSRNOG00000007477	3	172856733	172880450	+	Edn3	protein_coding	34.7934	14.3163	0.411466	-1.28116	24.5549	0.00106575	0.00450057
dHC enriched	ENSRNOG00000010997	15	88006977	88036354	-	Ednrb	protein_coding	358.579	245.699	0.685202	-0.545398	302.139	1.61e-05	9.36e-05
dHC enriched	ENSRNOG00000009439	8	85838869	85840818	-	Eef1a1	protein_coding	15843.2	14035.7	0.885918	-0.174756	14939.5	0.00199521	0.00793868
dHC enriched	ENSRNOG00000006931	8	26652121	26758325	+	Eepd1	protein_coding	307.298	163.216	0.531132	-0.912857	235.257	1.47e-12	1.76e-11
dHC enriched	ENSRNOG00000050091	11	90221056	90234286	-	Efcab1	protein_coding	78.2717	44.2901	0.565851	-0.821507	61.2809	0.00071117	0.00311648
dHC enriched	ENSRNOG00000010091	5	134593517	134633935	+	Efcab14	protein_coding	691.511	586.798	0.848573	-0.236889	639.154	0.0137175	0.0429844
dHC enriched	ENSRNOG00000042201	13	96303703	96414404	+	Efcab2	protein_coding	37.1267	19.5146	0.525621	-0.927906	28.3206	0.0086715	0.028905
dHC enriched	ENSRNOG00000003553	14	113202419	113295014	+	Efemp1	protein_coding	93.2803	39.8886	0.427621	-1.2256	66.5845	1.39e-06	9.27e-06
dHC enriched	ENSRNOG00000015596	9	94362299	94408885	+	Efhd1	protein_coding	241.597	181.289	0.750378	-0.41431	211.443	0.00226587	0.00885952
dHC enriched	ENSRNOG00000010320	10	56161432	56167426	-	Efnb3	protein_coding	1313.59	1109.11	0.844331	-0.244119	1211.35	0.00341756	0.012801
dHC enriched	ENSRNOG00000042029	15	33578381	33589522	-	Efs	protein_coding	131.514	82.2384	0.62532	-0.677333	106.876	0.00021346	0.00104037
dHC enriched	ENSRNOG00000004275	X	29430831	29488739	+	Egfl6	protein_coding	92.559	36.4094	0.393364	-1.34606	64.4842	2.38e-07	1.77e-06
dHC enriched	ENSRNOG00000043503	1	221644867	221667239	+	Ehd1	protein_coding	1206.44	605.504	0.501892	-0.994552	905.973	3.08e-37	1.22e-35
dHC enriched	ENSRNOG00000007744	6	25074955	25100977	+	Ehd3	protein_coding	1736.04	1250.07	0.720069	-0.473792	1493.05	1.81e-10	1.84e-09
dHC enriched	ENSRNOG00000001770	11	82945104	82978364	+	Ehhadh	protein_coding	23.1466	9.74063	0.420823	-1.24871	16.4436	0.00765693	0.0259967
dHC enriched	ENSRNOG00000008452	3	117938500	117940219	+	Eid1	protein_coding	1726.35	1557.57	0.902229	-0.148434	1641.96	0.0225942	0.0654793
dHC enriched	ENSRNOG00000018848	8	129158103	129160757	+	Eif1b	protein_coding	700.512	559.371	0.798517	-0.324605	629.942	0.0001233	0.00062576
dHC enriched	ENSRNOG00000048315	6	1428834	1466201	-	Eif2ak2	protein_coding	231.47	145.591	0.628984	-0.668906	188.53	2.55e-06	1.65e-05
dHC enriched	ENSRNOG00000001253	12	16285733	16310190	-	Eif3b	protein_coding	976.114	851.839	0.872684	-0.196468	913.977	0.00919725	0.0304568
dHC enriched	ENSRNOG00000027690	13	100129761	100162461	+	Eif3e	protein_coding	658.255	548.716	0.833591	-0.262587	603.486	0.00310173	0.0117304
dHC enriched	ENSRNOG00000004252	6	10151729	10236695	+	Eif3h	protein_coding	344.48	282.766	0.820849	-0.284811	313.623	0.0157407	0.0482994
dHC enriched	ENSRNOG00000047185	5	147796662	147803851	-	Eif3i	protein_coding	513.774	433.879	0.844492	-0.243844	473.826	0.0125589	0.0398107
dHC enriched	ENSRNOG00000055760	2	145936827	145937813	+	Eif3i-ps1	pseudogene	391.034	320.419	0.819414	-0.287336	355.727	0.00940618	0.0310114
dHC enriched	ENSRNOG00000011020	7	120320547	120331595	+	Eif3l	protein_coding	592.857	499.416	0.842389	-0.247442	546.136	0.00508756	0.0181925
dHC enriched	ENSRNOG00000030628	10	56271257	56276764	-	Eif4a1	protein_coding	2285.82	1907.63	0.834553	-0.260925	2096.73	2.51e-05	0.00014139
dHC enriched	ENSRNOG00000045791	10	108415202	108425206	-	Eif4a3	protein_coding	544.053	456.978	0.839952	-0.251622	500.516	0.00938691	0.0309716
dHC enriched	ENSRNOG00000010301	4	132068598	132111079	-	Eif4e3	protein_coding	153.552	95.5269	0.622114	-0.68475	124.54	0.00013359	0.00067461
dHC enriched	ENSRNOG00000012582	16	68954875	68968248	-	Eif4ebp1	protein_coding	71.7941	48.1021	0.670001	-0.577764	59.9481	0.0156956	0.0481736
dHC enriched	ENSRNOG00000055391	20	31055789	31072469	-	Eif4ebp2	protein_coding	212.258	146.566	0.690506	-0.534273	179.412	0.00047401	0.002162
dHC enriched	ENSRNOG00000017158	1	175883363	175895510	-	Eif4g2	protein_coding	6249.55	5560.15	0.889688	-0.168629	5904.85	0.0025173	0.00973634
dHC enriched	ENSRNOG00000017158	1	175883363	175895510	-	Eif4g2	protein_coding	6249.55	5560.15	0.889688	-0.168629	5904.85	0.0025173	0.00973634
dHC enriched	ENSRNOG00000011859	2	115337439	115354203	+	Eif5a2	protein_coding	896.858	756.387	0.843374	-0.245755	826.622	0.00189448	0.00756914
dHC enriched	ENSRNOG00000023356	9	44681494	44713199	+	Eif5b	protein_coding	761.217	608.709	0.799652	-0.322556	684.963	0.00028681	0.00136502
dHC enriched	ENSRNOG00000011762	15	61826711	61868343	+	Elf1	protein_coding	79.8846	46.1168	0.577293	-0.792624	63.0007	0.00088974	0.00382494
dHC enriched	ENSRNOG00000010815	2	140310375	140387505	-	Elf2	protein_coding	228.448	172.305	0.754241	-0.406902	200.376	0.00317727	0.0119845
dHC enriched	ENSRNOG00000007934	7	119894066	119896925	-	Elfn2	protein_coding	1423.88	1152.84	0.809645	-0.304639	1288.36	0.00025308	0.00121761
dHC enriched	ENSRNOG00000004367	7	34086220	34121694	-	Elk3	protein_coding	118.838	68.0983	0.573035	-0.803304	93.4681	8.2e-05	0.00042857
dHC enriched	ENSRNOG00000018747	3	161812474	162003588	-	Elmo2	protein_coding	2439.6	1953.84	0.800887	-0.320329	2196.72	4.78e-07	3.41e-06
dHC enriched	ENSRNOG00000015800	19	37260469	37264829	+	Elmo3	protein_coding	44.9934	26.7569	0.594686	-0.7498	35.8751	0.0198411	0.0587321
dHC enriched	ENSRNOG00000010653	6	107633716	107678156	-	Elmsan1	protein_coding	329.726	256.62	0.778285	-0.36163	293.173	0.00176672	0.00711485
dHC enriched	ENSRNOG00000028448	5	137255871	137260481	+	Elovl1	protein_coding	356.263	249.253	0.699631	-0.515333	302.758	0.00021242	0.00103561
dHC enriched	ENSRNOG00000014702	17	21382455	21422407	+	Elovl2	protein_coding	541.139	333.565	0.616413	-0.698032	437.352	2.73e-12	3.21e-11
dHC enriched	ENSRNOG00000006331	8	85259982	85285983	+	Elovl5	protein_coding	438.654	273.494	0.623483	-0.681577	356.074	1.07e-09	1.01e-08
dHC enriched	ENSRNOG00000009934	4	145471454	145487426	-	Emc3	protein_coding	1053.93	876.21	0.831374	-0.26643	965.069	0.00067379	0.00297234
dHC enriched	ENSRNOG00000005719	3	103852139	103857158	-	Emc4	protein_coding	635.487	549.368	0.864484	-0.210089	592.428	0.0162424	0.0496129
dHC enriched	ENSRNOG00000014837	9	119594629	119653255	-	Emilin2	protein_coding	57.459	12.2546	0.213276	-2.22921	34.8568	3.44e-10	3.41e-09
dHC enriched	ENSRNOG00000004207	6	122770055	122897997	-	Eml5	protein_coding	838.962	517.84	0.617239	-0.6961	678.401	0.00043149	0.00198068
dHC enriched	ENSRNOG00000037462	14	114176051	114484127	-	Eml6	protein_coding	171.231	124.396	0.726481	-0.461004	147.814	0.00822813	0.0276306
dHC enriched	ENSRNOG00000009482	1	280633938	280640946	+	Emx2	protein_coding	160.341	41.1574	0.256687	-1.96192	100.749	8.1e-21	1.62e-19
dHC enriched	ENSRNOG00000031934	13	100300054	100414226	-	Enah	protein_coding	532.231	413.753	0.777395	-0.363281	472.992	0.0002639	0.00126366
dHC enriched	ENSRNOG00000016541	2	28049217	28061029	+	Enc1	protein_coding	13749.2	10274.8	0.7473	-0.420241	12012	4.41e-18	7.52e-17
dHC enriched	ENSRNOG00000024757	8	12900830	12902262	-	Endod1	protein_coding	397.086	326.551	0.82237	-0.28214	361.818	0.0107116	0.0346967
dHC enriched	ENSRNOG00000043300	5	58018039	58019836	-	Enho	protein_coding	512.635	379.44	0.740177	-0.434059	446.038	0.00029687	0.00140978
dHC enriched	ENSRNOG00000030622	X	135918929	136150209	-	Enox2	protein_coding	103.57	24.5112	0.236663	-2.07909	64.0405	1.42e-15	2.07e-14
dHC enriched	ENSRNOG00000010174	9	19448269	19457946	+	Enpp4	protein_coding	459.032	362.456	0.789609	-0.340789	410.744	0.00119763	0.00499459
dHC enriched	ENSRNOG00000013102	3	2617805	2623445	+	Entpd2	protein_coding	356.11	170.245	0.478069	-1.06471	263.177	4.37e-18	7.47e-17
dHC enriched	ENSRNOG00000021318	6	10306405	10387265	+	Epas1	protein_coding	2180.54	1166.66	0.535031	-0.902305	1673.6	6.8e-41	3.22e-39
dHC enriched	ENSRNOG00000002538	13	35580098	35668968	-	Epb4.1l5	protein_coding	95.8711	65.4689	0.682884	-0.550287	80.67	0.0108333	0.0350249
dHC enriched	ENSRNOG00000026050	18	26570647	26658892	-	Epb41l4a	protein_coding	82.5265	24.8068	0.300592	-1.73412	53.6667	2.2e-10	2.21e-09
dHC enriched	ENSRNOG00000030285	11	421135	782954	-	Epha3	protein_coding	182.051	98.779	0.542589	-0.882069	140.415	8.9e-08	6.93e-07
dHC enriched	ENSRNOG00000013213	9	83111222	83253458	-	Epha4	protein_coding	5236.63	2428.11	0.463678	-1.10881	3832.37	4.82e-64	4.34e-62
dHC enriched	ENSRNOG00000002024	14	25589762	25958227	+	Epha5	protein_coding	1898.48	1266.32	0.667015	-0.584209	1582.4	6.98e-16	1.04e-14
dHC enriched	ENSRNOG00000029184	11	42259761	42843865	+	Epha6	protein_coding	792.65	201.777	0.25456	-1.97392	497.213	1.06e-69	1.11e-67
dHC enriched	ENSRNOG00000007030	5	43603043	43757549	+	Epha7	protein_coding	1739.17	485.746	0.279297	-1.84013	1112.46	1.74e-134	6.52e-132
dHC enriched	ENSRNOG00000013036	5	155295314	155316495	-	Epha8	protein_coding	563.978	52.7013	0.0934457	-3.41973	308.34	2.73e-99	5.15e-97
dHC enriched	ENSRNOG00000007865	8	110376954	110813000	-	Ephb1	protein_coding	398.114	295.389	0.741972	-0.430564	346.751	0.00012779	0.00064647
dHC enriched	ENSRNOG00000012531	5	155022493	155204456	-	Ephb2	protein_coding	341.136	192.334	0.563805	-0.826731	266.735	4.25e-10	4.18e-09
dHC enriched	ENSRNOG00000003515	13	99271366	99300579	-	Ephx1	protein_coding	277.34	111.505	0.402053	-1.31454	194.423	3.02e-20	5.89e-19
dHC enriched	ENSRNOG00000060550	10	47795524	47857326	-	Epn2	protein_coding	2880.8	1709.63	0.593458	-0.752781	2295.22	1.72e-36	6.63e-35
dHC enriched	ENSRNOG00000010299	5	128923934	129022054	+	Eps15	protein_coding	1785.8	1442.89	0.80798	-0.307609	1614.34	2.43e-06	1.57e-05
dHC enriched	ENSRNOG00000007047	4	171475567	171591882	-	Eps8	protein_coding	510.07	382.309	0.749522	-0.415958	446.19	2.31e-05	0.00013084
dHC enriched	ENSRNOG00000047137	2	33881024	33920837	-	Erbb2ip	protein_coding	496.861	325.711	0.655538	-0.609249	411.286	4.92e-09	4.4e-08
dHC enriched	ENSRNOG00000009264	4	152087379	152380184	-	Erc1	protein_coding	1749.6	923.491	0.527828	-0.921859	1336.55	2.57e-27	7.18e-26
dHC enriched	ENSRNOG00000005956	7	73222730	73242899	+	Erich5	protein_coding	38.2901	19.2522	0.502798	-0.99195	28.7712	0.00617962	0.0215597
dHC enriched	ENSRNOG00000021472	3	44068057	44086022	-	Ermn	protein_coding	606.484	351.099	0.57891	-0.78859	478.791	0.00302197	0.0114565
dHC enriched	ENSRNOG00000010915	1	247787582	247821728	-	Ermp1	protein_coding	856.332	535.964	0.625884	-0.676034	696.148	3.32e-15	4.73e-14
dHC enriched	ENSRNOG00000058186	5	167952728	167966009	+	Errfi1	protein_coding	320.079	177.043	0.553122	-0.854331	248.561	8.04e-12	9.13e-11
dHC enriched	ENSRNOG00000009512	15	56756661	56776348	+	Esd	protein_coding	501.934	410.194	0.817226	-0.291194	456.064	0.00252076	0.00974754
dHC enriched	ENSRNOG00000019358	1	41192824	41594796	+	Esr1	protein_coding	78.2775	17.633	0.225263	-2.15032	47.9552	3.23e-13	4.05e-12
dHC enriched	ENSRNOG00000021139	1	222168730	222178725	-	Esrra	protein_coding	407.29	324.214	0.796027	-0.32911	365.752	0.00204139	0.00810572
dHC enriched	ENSRNOG00000060753	7	2924603	2941122	-	Esyt1	protein_coding	83.3888	59.0704	0.708374	-0.497418	71.2296	0.0260988	0.0738717
dHC enriched	ENSRNOG00000022704	8	107555277	107602263	-	Esyt3	protein_coding	266.091	100.416	0.377374	-1.40593	183.253	2.87e-17	4.64e-16
dHC enriched	ENSRNOG00000015233	8	60028789	60086403	-	Etfa	protein_coding	368.116	245.781	0.667674	-0.582785	306.949	7.16e-07	5e-06
dHC enriched	ENSRNOG00000017851	1	98472745	98486976	-	Etfb	protein_coding	350.458	240.84	0.687215	-0.541167	295.649	1.73e-05	0.0001
dHC enriched	ENSRNOG00000009538	2	178367549	178389608	-	Etfdh	protein_coding	340.584	246.756	0.724509	-0.464923	293.67	4.8e-05	0.00026026
dHC enriched	ENSRNOG00000024818	5	144160108	144161410	+	Eva1b	protein_coding	53.8621	18.4318	0.342204	-1.54707	36.147	3.11e-06	1.98e-05
dHC enriched	ENSRNOG00000007564	14	78213635	78253266	+	Evc	protein_coding	105.938	39.64	0.374182	-1.41819	72.7889	1.28e-09	1.2e-08
dHC enriched	ENSRNOG00000007025	14	78129749	78211931	-	Evc2	protein_coding	25.4275	8.09795	0.318472	-1.65076	16.7627	0.00094613	0.00404107
dHC enriched	ENSRNOG00000022764	10	66870067	66873948	-	Evi2a	protein_coding	399.734	236.228	0.590965	-0.758857	317.981	4.37e-07	3.14e-06
dHC enriched	ENSRNOG00000010111	6	135866739	135880721	+	Exoc3l4	protein_coding	53.4852	7.94916	0.148624	-2.75027	30.7172	3.93e-11	4.23e-10
dHC enriched	ENSRNOG00000036601	1	256226179	256368813	+	Exoc6	protein_coding	598.551	523.494	0.874603	-0.193299	561.023	0.0284447	0.0794493
dHC enriched	ENSRNOG00000059615	4	116314695	116786424	-	Exoc6b	protein_coding	1179.86	987.384	0.836862	-0.256938	1083.62	0.0010322	0.00437718
dHC enriched	ENSRNOG00000019766	19	57647291	57649827	-	Exoc8	protein_coding	363.482	285.979	0.786776	-0.345975	324.731	0.00229493	0.00896091
dHC enriched	ENSRNOG00000012409	5	60868502	60871705	-	Exosc3	protein_coding	50.3009	26.6982	0.53077	-0.913841	38.4995	0.00456824	0.0165349
dHC enriched	ENSRNOG00000018524	1	47287874	47331412	-	Ezr	protein_coding	776.348	412.864	0.531803	-0.911036	594.606	7.23e-24	1.67e-22
dHC enriched	ENSRNOG00000015139	17	9736577	9744420	+	F12	protein_coding	96.2183	68.0376	0.707117	-0.49998	82.128	0.0218939	0.0638154
dHC enriched	ENSRNOG00000011800	2	225310624	225322272	+	F3	protein_coding	164.624	114.336	0.694531	-0.52589	139.48	0.00181985	0.00729977
dHC enriched	ENSRNOG00000018950	19	43545378	43596801	-	Fa2h	protein_coding	342.588	176.786	0.516031	-0.954472	259.687	0.00621219	0.0216514
dHC enriched	ENSRNOG00000045949	5	134852875	134871775	-	Faah	protein_coding	176.245	103.836	0.58916	-0.763269	140.04	2.4e-05	0.00013575
dHC enriched	ENSRNOG00000036699	10	109539548	109551362	-	Faap100	protein_coding	261.182	90.8395	0.347802	-1.52366	176.011	1.73e-21	3.61e-20
dHC enriched	ENSRNOG00000000814	20	40769586	40773349	+	Fabp7	protein_coding	624.16	290.355	0.465193	-1.1041	457.258	5.57e-17	8.88e-16
dHC enriched	ENSRNOG00000020480	1	226234074	226249138	+	Fads1	protein_coding	2480.75	1468.18	0.59183	-0.756745	1974.47	4.54e-22	9.75e-21
dHC enriched	ENSRNOG00000020440	1	226114413	226152524	-	Fads2	protein_coding	956.338	529.188	0.553348	-0.85374	742.763	4.77e-24	1.11e-22
dHC enriched	ENSRNOG00000021380	10	103832838	103848035	-	Fads6	protein_coding	292.644	169.143	0.577981	-0.790906	230.893	3.45e-09	3.12e-08
dHC enriched	ENSRNOG00000013223	1	146713676	146736261	-	Fah	protein_coding	266.96	135.858	0.508907	-0.974525	201.409	1.27e-10	1.3e-09
dHC enriched	ENSRNOG00000006674	10	64196127	64202380	-	Fam101b	protein_coding	75.798	14.6844	0.19373	-2.36788	45.2412	3e-14	4.06e-13
dHC enriched	ENSRNOG00000012109	2	80383643	80408672	-	Fam105a	protein_coding	64.4301	35.6302	0.553006	-0.854633	50.0301	0.00231809	0.00903901
dHC enriched	ENSRNOG00000033261	15	18399515	18415965	+	Fam107a	protein_coding	7183.82	5003.85	0.696544	-0.521713	6093.84	3.39e-13	4.24e-12
dHC enriched	ENSRNOG00000014886	17	78489668	78561613	-	Fam107b	protein_coding	116.794	61.5198	0.526737	-0.924846	89.1569	6.61e-06	4.03e-05
dHC enriched	ENSRNOG00000026504	14	44943172	45002719	-	Fam114a1	protein_coding	65.2851	35.4344	0.542765	-0.881602	50.3598	0.0020597	0.00816991
dHC enriched	ENSRNOG00000004417	10	83154423	83198679	+	Fam117a	protein_coding	41.0104	21.5116	0.524541	-0.930872	31.261	0.00638082	0.0221494
dHC enriched	ENSRNOG00000011543	8	36416997	36467627	-	Fam118b	protein_coding	183.591	118.143	0.643511	-0.635962	150.867	5.25e-05	0.00028339
dHC enriched	ENSRNOG00000009802	15	45712821	45780405	+	Fam124a	protein_coding	291.723	210.335	0.721009	-0.471911	251.029	0.00018637	0.00091742
dHC enriched	ENSRNOG00000018586	9	82345719	82351802	+	Fam134a	protein_coding	2983.89	2702.91	0.905835	-0.14268	2843.4	0.0137827	0.0431573
dHC enriched	ENSRNOG00000020056	10	89006595	89030595	-	Fam134c	protein_coding	711.411	552.209	0.776217	-0.365469	631.81	5.33e-05	0.00028696
dHC enriched	ENSRNOG00000007947	4	89183768	89281222	-	Fam13a	protein_coding	260.127	167.563	0.644157	-0.634517	213.845	5.51e-06	3.39e-05
dHC enriched	ENSRNOG00000005154	6	49825469	49834912	+	Fam150b	protein_coding	26.6603	13.3334	0.500122	-0.999647	19.9969	0.0186396	0.0557955
dHC enriched	ENSRNOG00000007799	5	126334803	126347770	+	Fam151a	protein_coding	96.6784	37.0047	0.38276	-1.38549	66.8415	4.98e-09	4.45e-08
dHC enriched	ENSRNOG00000038066	X	69580015	69605032	+	Fam155b	protein_coding	401.505	156.334	0.38937	-1.36079	278.919	1.11e-24	2.67e-23
dHC enriched	ENSRNOG00000024825	13	73741679	73819896	-	Fam163a	protein_coding	349.903	197.207	0.563606	-0.827241	273.555	1.07e-11	1.2e-10
dHC enriched	ENSRNOG00000006591	3	5656163	5693147	-	Fam163b	protein_coding	2107.96	1133.64	0.537793	-0.894878	1620.8	4.56e-35	1.67e-33
dHC enriched	ENSRNOG00000016534	17	79031423	79085076	-	Fam171a1	protein_coding	568.217	489.168	0.860883	-0.216111	528.693	0.0207622	0.0610027
dHC enriched	ENSRNOG00000010763	1	157920786	157922274	+	Fam181b	protein_coding	89.0546	45.5353	0.511319	-0.967704	67.295	7.17e-05	0.00037865
dHC enriched	ENSRNOG00000016955	17	79720535	79798435	-	Fam188a	protein_coding	668.342	539.412	0.80709	-0.309198	603.877	0.00033085	0.00155735
dHC enriched	ENSRNOG00000004180	7	66017086	66172360	-	Fam19a2	protein_coding	576.413	138.062	0.23952	-2.06178	357.238	2.37e-57	1.77e-55
dHC enriched	ENSRNOG00000049349	7	128500011	128728928	+	Fam19a5	protein_coding	1386.98	991.65	0.714971	-0.484042	1189.31	2.12e-11	2.33e-10
dHC enriched	ENSRNOG00000004466	3	170354141	170362513	+	Fam210b	protein_coding	132.622	87.2057	0.657553	-0.604821	109.914	0.00131078	0.00542349
dHC enriched	ENSRNOG00000011140	16	17493953	17513870	+	Fam213a	protein_coding	747.534	410.025	0.548504	-0.866427	578.78	4.67e-17	7.49e-16
dHC enriched	ENSRNOG00000024605	12	13043038	13067341	-	Fam220a	protein_coding	297.153	239.522	0.806057	-0.311046	268.337	0.0166481	0.050681
dHC enriched	ENSRNOG00000029570	10	65351245	65416869	+	Fam222b	protein_coding	456.009	363.527	0.797192	-0.327001	409.768	0.00112334	0.00471947
dHC enriched	ENSRNOG00000060623	X	156319687	156328309	+	Fam3a	protein_coding	241.116	187.197	0.776376	-0.365172	214.156	0.0171005	0.0518014
dHC enriched	ENSRNOG00000061348	1	204714473	204817080	-	Fam53b	protein_coding	420.995	277.658	0.659529	-0.600493	349.327	2.8e-08	2.3e-07
dHC enriched	ENSRNOG00000017513	3	8928534	8951189	+	Fam73b	protein_coding	1033.07	910.824	0.881665	-0.181698	971.948	0.0126079	0.0399293
dHC enriched	ENSRNOG00000004084	6	39358985	39363458	-	Fam84a	protein_coding	937.584	790.09	0.842688	-0.24693	863.837	0.00113421	0.00475815
dHC enriched	ENSRNOG00000019022	19	57502308	57514896	-	Fam89a	protein_coding	47.055	29.3472	0.623679	-0.681125	38.2011	0.0247323	0.0706638
dHC enriched	ENSRNOG00000014119	9	84324442	84383687	-	Farsb	protein_coding	553.801	472.477	0.853152	-0.229125	513.139	0.0141376	0.0441078
dHC enriched	ENSRNOG00000028335	2	125751578	125879366	+	Fat4	protein_coding	821.764	137.142	0.166888	-2.58305	479.453	7.65e-113	1.93e-110
dHC enriched	ENSRNOG00000027259	10	43502931	43512287	-	Faxdc2	protein_coding	55.8297	34.0364	0.609647	-0.713953	44.933	0.0146065	0.045365
dHC enriched	ENSRNOG00000019229	1	85103519	85112619	+	Fbl	protein_coding	216.426	146.932	0.678902	-0.558726	181.679	0.00013678	0.00068932
dHC enriched	ENSRNOG00000014137	7	126096793	126176468	+	Fbln1	protein_coding	230.338	126.967	0.55122	-0.859301	178.653	3.08e-09	2.8e-08
dHC enriched	ENSRNOG00000007338	4	122835436	122895121	+	Fbln2	protein_coding	390.75	135.11	0.345771	-1.53211	262.93	3.6e-33	1.26e-31
dHC enriched	ENSRNOG00000007302	3	117569697	117766120	-	Fbn1	protein_coding	467.317	107.057	0.229089	-2.12602	287.187	6.47e-43	3.24e-41
dHC enriched	ENSRNOG00000030721	12	52356832	52377475	+	Fbrsl1	protein_coding	673.62	378.417	0.561766	-0.83196	526.018	6.45e-13	7.93e-12
dHC enriched	ENSRNOG00000019509	1	266075782	266078023	+	Fbxl15	protein_coding	234.332	170.56	0.727855	-0.458277	202.446	0.00137422	0.00567098
dHC enriched	ENSRNOG00000012634	5	60591357	60658564	-	Fbxo10	protein_coding	1119.22	583.775	0.52159	-0.939011	851.498	8.09e-30	2.49e-28
dHC enriched	ENSRNOG00000009409	5	164972480	164977916	+	Fbxo2	protein_coding	744.836	463.784	0.622666	-0.68347	604.31	1.75e-13	2.24e-12
dHC enriched	ENSRNOG00000042274	19	53487613	53625673	-	Fbxo31	protein_coding	753.183	608.738	0.808221	-0.307178	680.96	0.00021591	0.00105113
dHC enriched	ENSRNOG00000001126	12	44046217	44138138	+	Fbxw8	protein_coding	607.339	516.957	0.851183	-0.232458	562.148	0.00869785	0.0289816
dHC enriched	ENSRNOG00000046663	13	91146876	91229066	-	Fcgr2a	protein_coding	43.2861	25.3785	0.586298	-0.770295	34.3323	0.0179048	0.053934
dHC enriched	ENSRNOG00000046663	13	91146876	91229066	-	Fcgr2a	protein_coding	43.2861	25.3785	0.586298	-0.770295	34.3323	0.0179048	0.053934
dHC enriched	ENSRNOG00000046663	13	91146876	91229066	-	Fcgr2a	protein_coding	43.2861	25.3785	0.586298	-0.770295	34.3323	0.0179048	0.053934
dHC enriched	ENSRNOG00000046663	13	91146876	91229066	-	Fcgr2a	protein_coding	43.2861	25.3785	0.586298	-0.770295	34.3323	0.0179048	0.053934
dHC enriched	ENSRNOG00000024382	13	89385859	89396051	+	Fcgr3a	protein_coding	20.0984	8.26437	0.411196	-1.2821	14.1814	0.0184815	0.0554284
dHC enriched	ENSRNOG00000020583	1	101086877	101095594	-	Fcgrt	protein_coding	271.604	166.969	0.614752	-0.701923	219.287	7.88e-07	5.46e-06
dHC enriched	ENSRNOG00000021274	3	125566643	125607735	-	Fermt1	protein_coding	19.554	8.12732	0.415634	-1.26661	13.8407	0.0179386	0.0540169
dHC enriched	ENSRNOG00000009102	15	19807808	19876408	-	Fermt2	protein_coding	917.654	587.573	0.640299	-0.643183	752.614	1.12e-14	1.55e-13
dHC enriched	ENSRNOG00000006075	8	39305128	39350270	+	Fez1	protein_coding	3239.58	2774.09	0.856311	-0.223794	3006.84	0.00068099	0.00299952
dHC enriched	ENSRNOG00000004577	6	963907	1004001	-	Fez2	protein_coding	284.169	219.839	0.773622	-0.3703	252.004	0.0036219	0.0134725
dHC enriched	ENSRNOG00000059491	11	88699222	88796677	+	Fgd4	protein_coding	335.293	240.53	0.717374	-0.479202	287.911	7.44e-05	0.00039179
dHC enriched	ENSRNOG00000012278	2	51672722	51750369	+	Fgf10	protein_coding	36.7449	2.97996	0.0810987	-3.62418	19.8624	1.35e-11	1.5e-10
dHC enriched	ENSRNOG00000014882	10	56403256	56409017	-	Fgf11	protein_coding	148.516	90.0113	0.606073	-0.722437	119.263	4.56e-05	0.00024791
dHC enriched	ENSRNOG00000042753	X	142053654	142248369	-	Fgf13	protein_coding	2749.98	1241.91	0.451608	-1.14686	1995.95	1.36e-68	1.4e-66
dHC enriched	ENSRNOG00000017392	2	124081072	124134681	+	Fgf2	protein_coding	48.3247	15.6105	0.323033	-1.63025	31.9676	3.16e-06	2.01e-05
dHC enriched	ENSRNOG00000022796	1	255555050	255557055	-	Fgfbp3	protein_coding	132.799	70.4459	0.530469	-0.91466	101.623	1.88e-06	1.24e-05
dHC enriched	ENSRNOG00000016050	16	71266248	71319449	-	Fgfr1	protein_coding	2212.94	546.067	0.246761	-2.01882	1379.5	2.64e-138	1.05e-135
dHC enriched	ENSRNOG00000016374	1	200590953	200696928	-	Fgfr2	protein_coding	952.948	545.693	0.572637	-0.804308	749.32	4.9e-18	8.32e-17
dHC enriched	ENSRNOG00000016818	14	82273070	82287706	-	Fgfr3	protein_coding	824.715	586.829	0.711554	-0.490955	705.772	2.77e-07	2.04e-06
dHC enriched	ENSRNOG00000024207	14	2018500	2032593	-	Fgfrl1	protein_coding	150.967	72.067	0.477368	-1.06683	111.517	1.28e-08	1.09e-07
dHC enriched	ENSRNOG00000012881	4	10323607	10329241	-	Fgl2	protein_coding	40.5147	9.22376	0.227665	-2.13502	24.8692	1.55e-07	1.17e-06
dHC enriched	ENSRNOG00000028064	5	160437896	160555083	-	Fhad1	protein_coding	21.3511	10.0265	0.469601	-1.09049	15.6888	0.0263552	0.0745085
dHC enriched	ENSRNOG00000024594	2	183450619	183487820	-	Fhdc1	protein_coding	227.407	77.8154	0.342185	-1.54715	152.611	3.46e-18	5.96e-17
dHC enriched	ENSRNOG00000011521	8	87256264	87419370	-	Filip1	protein_coding	334.595	56.2607	0.168146	-2.57222	195.428	3.65e-52	2.38e-50
dHC enriched	ENSRNOG00000015941	10	88326080	88338207	+	Fkbp10	protein_coding	82.5372	58.1404	0.704414	-0.505505	70.3388	0.0298655	0.0827724
dHC enriched	ENSRNOG00000054775	7	140398199	140437467	-	Fkbp11	protein_coding	19669.5	16789.9	0.853602	-0.228364	18229.7	9.85e-07	6.74e-06
dHC enriched	ENSRNOG00000054775	7	140398199	140437467	-	Fkbp11	protein_coding	19669.5	16789.9	0.853602	-0.228364	18229.7	9.85e-07	6.74e-06
dHC enriched	ENSRNOG00000009886	4	84753633	84768249	-	Fkbp14	protein_coding	51.0426	20.284	0.397394	-1.33136	35.6633	5.82e-05	0.00031222
dHC enriched	ENSRNOG00000008822	3	147042944	147062724	+	Fkbp1a	protein_coding	8028.15	5013.24	0.624457	-0.679325	6520.69	1.41e-36	5.45e-35
dHC enriched	ENSRNOG00000022523	20	7976713	8019020	-	Fkbp5	protein_coding	674.542	267.622	0.396746	-1.33371	471.082	2.76e-37	1.1e-35
dHC enriched	ENSRNOG00000005478	4	87167514	87234197	+	Fkbp9	protein_coding	623.393	314.397	0.504331	-0.987556	468.895	3.45e-17	5.56e-16
dHC enriched	ENSRNOG00000028129	5	70528688	70578273	+	Fktn	protein_coding	1046.08	909.167	0.869118	-0.202376	977.624	0.0069647	0.0239203
dHC enriched	ENSRNOG00000003302	10	46153188	46172309	-	Flcn	protein_coding	670.374	526.412	0.78525	-0.348776	598.393	0.00026108	0.00125121
dHC enriched	ENSRNOG00000007281	4	56711049	56738791	+	Flnc	protein_coding	180.137	78.5691	0.436164	-1.19706	129.353	3.47e-09	3.14e-08
dHC enriched	ENSRNOG00000004874	3	134683065	134696654	-	Flrt3	protein_coding	397.959	217.307	0.546054	-0.872884	307.633	7.73e-11	8.07e-10
dHC enriched	ENSRNOG00000056212	1	101126969	101131012	-	Flt3l	protein_coding	34.5937	9.12976	0.263914	-1.92186	21.8617	9.44e-06	5.64e-05
dHC enriched	ENSRNOG00000003207	10	91254058	91281418	+	Fmnl1	protein_coding	1346.38	1194.21	0.886977	-0.173032	1270.3	0.0222867	0.0647299
dHC enriched	ENSRNOG00000034191	13	80712882	80745347	-	Fmo1	protein_coding	27.6262	9.22376	0.333878	-1.58261	18.425	0.00047685	0.00217324
dHC enriched	ENSRNOG00000003400	13	80685325	80703615	-	Fmo4	protein_coding	22.5982	8.55414	0.378532	-1.40151	15.5762	0.00358853	0.0133541
dHC enriched	ENSRNOG00000003183	13	50873605	50885563	+	Fmod	protein_coding	30.1994	13.8346	0.45811	-1.12623	22.017	0.00800271	0.0270143
dHC enriched	ENSRNOG00000008258	3	9861237	9936617	-	Fnbp1	protein_coding	826.068	694.454	0.840673	-0.250383	760.261	0.0146346	0.0454442
dHC enriched	ENSRNOG00000030210	1	47605262	47687504	+	Fndc1	protein_coding	31.7394	17.1063	0.538961	-0.891747	24.4229	0.0188568	0.0563084
dHC enriched	ENSRNOG00000024089	2	113112902	113345577	-	Fndc3b	protein_coding	143.985	92.9092	0.645269	-0.632027	118.447	0.00181878	0.00729718
dHC enriched	ENSRNOG00000051056	6	26387877	26389518	+	Fndc4	protein_coding	622.898	404.923	0.650063	-0.621348	513.91	2.5e-11	2.74e-10
dHC enriched	ENSRNOG00000030238	5	147323240	147330266	+	Fndc5	protein_coding	1438.46	680.11	0.472806	-1.08068	1059.28	6.33e-46	3.49e-44
dHC enriched	ENSRNOG00000007660	6	99883959	99966988	+	Fntb	protein_coding	515.463	387.435	0.751626	-0.411914	451.449	3.95e-05	0.00021738
dHC enriched	ENSRNOG00000013770	1	150323768	150395415	-	Folh1	protein_coding	173.521	88.9698	0.512732	-0.963723	131.245	2.96e-08	2.42e-07
dHC enriched	ENSRNOG00000005936	4	161685258	161696305	+	Foxm1	protein_coding	45.201	27.8788	0.616774	-0.697186	36.5399	0.0324864	0.0888907
dHC enriched	ENSRNOG00000040110	6	12179227	12205446	+	Foxn2	protein_coding	256.998	167.234	0.650721	-0.61989	212.116	8.9e-06	5.33e-05
dHC enriched	ENSRNOG00000004709	6	123187726	123577695	-	Foxn3	protein_coding	242.347	178.505	0.736567	-0.44111	210.426	0.0021368	0.00841799
dHC enriched	ENSRNOG00000013397	2	141451234	141527016	+	Foxo1	protein_coding	290.496	147.378	0.507334	-0.978992	218.937	1.73e-12	2.06e-11
dHC enriched	ENSRNOG00000033316	X	71155601	71162158	+	Foxo4	protein_coding	258.916	157.982	0.610169	-0.712719	208.449	5.49e-07	3.89e-06
dHC enriched	ENSRNOG00000032639	5	139208046	139227196	-	Foxo6	protein_coding	180.884	92.7564	0.512795	-0.963546	136.82	5.6e-08	4.45e-07
dHC enriched	ENSRNOG00000015235	1	256881771	256914260	-	Fra10ac1	protein_coding	213.664	150.17	0.702835	-0.508743	181.917	0.00056956	0.00254784
dHC enriched	ENSRNOG00000007764	4	129658840	129846642	-	Frmd4b	protein_coding	302.086	125.399	0.415109	-1.26844	213.742	7.08e-18	1.19e-16
dHC enriched	ENSRNOG00000005642	7	60128508	60210518	-	Frs2	protein_coding	852.062	604.094	0.708979	-0.496186	728.078	2.87e-09	2.63e-08
dHC enriched	ENSRNOG00000007765	3	67635607	67668772	-	Frzb	protein_coding	428.725	29.357	0.0684752	-3.86827	229.041	1.37e-90	2.2e-88
dHC enriched	ENSRNOG00000036700	10	109533487	109540026	+	Fscn2	protein_coding	15.4051	6.26729	0.406833	-1.29749	10.8362	0.0256429	0.0726978
dHC enriched	ENSRNOG00000009139	3	10222381	10269721	-	Fubp3	protein_coding	333.62	263.093	0.788603	-0.342629	298.357	0.0036556	0.0135773
dHC enriched	ENSRNOG00000009325	5	154269118	154286544	+	Fuca1	protein_coding	311.475	256.561	0.823698	-0.279812	284.018	0.0272031	0.0765281
dHC enriched	ENSRNOG00000050857	16	64631264	64716224	-	Fut10	protein_coding	128.574	89.5983	0.696861	-0.521056	109.086	0.0101831	0.0332415
dHC enriched	ENSRNOG00000009157	8	13258768	13262729	-	Fut4	protein_coding	38.5307	11.6633	0.302703	-1.72403	25.097	3.08e-05	0.00017113
dHC enriched	ENSRNOG00000008451	6	100337226	100537224	+	Fut8	protein_coding	580.435	431.273	0.743016	-0.428536	505.854	7.45e-06	4.51e-05
dHC enriched	ENSRNOG00000051480	2	120512899	120570355	-	Fxr1	protein_coding	566.584	475.488	0.83922	-0.25288	521.036	0.0114107	0.0366574
dHC enriched	ENSRNOG00000021079	1	89484199	89488223	-	Fxyd1	protein_coding	376.047	247.739	0.658798	-0.602091	311.893	2.05e-07	1.54e-06
dHC enriched	ENSRNOG00000000596	20	44436403	44630317	+	Fyn	protein_coding	1484.68	1080.37	0.727678	-0.458628	1282.53	6.34e-09	5.59e-08
dHC enriched	ENSRNOG00000016242	4	26470864	26475262	+	Fzd1	protein_coding	111.728	64.7542	0.579568	-0.786951	88.2413	0.0001456	0.00072929
dHC enriched	ENSRNOG00000021962	10	90550147	90552057	+	Fzd2	protein_coding	104.116	65.3005	0.627187	-0.673032	84.7084	0.00130513	0.0054027
dHC enriched	ENSRNOG00000016848	1	153589471	153598375	+	Fzd4	protein_coding	185.309	113.477	0.612366	-0.707534	149.393	6.39e-06	3.9e-05
dHC enriched	ENSRNOG00000016119	9	66305731	66308550	+	Fzd7	protein_coding	52.129	5.2903	0.101485	-3.30066	28.7096	3.03e-14	4.09e-13
dHC enriched	ENSRNOG00000001452	12	24473981	24476295	+	Fzd9	protein_coding	113.019	59.9808	0.530716	-0.913987	86.4997	9.8e-06	5.85e-05
dHC enriched	ENSRNOG00000006019	13	112004140	112005052	-	G0s2	protein_coding	67.9213	42.6924	0.628557	-0.669884	55.3069	0.010968	0.0354204
dHC enriched	ENSRNOG00000017879	19	30794571	30902008	+	Gab1	protein_coding	218.167	149.45	0.685024	-0.545773	183.808	0.00044185	0.00202501
dHC enriched	ENSRNOG00000017417	10	56601288	56604221	+	Gabarap	protein_coding	1408.01	1253.85	0.890517	-0.167285	1330.93	0.0135369	0.0424571
dHC enriched	ENSRNOG00000019425	19	44164935	44175770	+	Gabarapl2	protein_coding	1123.16	992.341	0.883528	-0.178652	1057.75	0.0117718	0.0376557
dHC enriched	ENSRNOG00000019425	19	44164935	44175770	+	Gabarapl2	protein_coding	1123.16	992.341	0.883528	-0.178652	1057.75	0.0117718	0.0376557
dHC enriched	ENSRNOG00000000774	20	1955359	1984863	-	Gabbr1	protein_coding	12791.7	11684.8	0.913472	-0.130567	12238.3	0.0138066	0.043224
dHC enriched	ENSRNOG00000053205	11	24263281	24322815	+	Gabpa	protein_coding	224.287	154.852	0.690418	-0.534458	189.569	0.00013426	0.00067761
dHC enriched	ENSRNOG00000021105	2	196359243	196377883	-	Gabpb2	protein_coding	29.8861	15.495	0.518469	-0.947672	22.6905	0.0167265	0.0508718
dHC enriched	ENSRNOG00000002349	14	39661968	39798302	+	Gabra2	protein_coding	1555.32	949.308	0.610363	-0.712261	1252.31	3.09e-25	7.74e-24
dHC enriched	ENSRNOG00000002336	14	39154529	39231695	+	Gabra4	protein_coding	1613.74	1301.7	0.806636	-0.31001	1457.72	1.96e-05	0.00011215
dHC enriched	ENSRNOG00000010803	1	112833975	112947173	-	Gabra5	protein_coding	2209.02	1208.49	0.547068	-0.870208	1708.75	1.5e-35	5.58e-34
dHC enriched	ENSRNOG00000060599	1	112976770	113265364	+	Gabrb3	protein_coding	1551.08	1269.37	0.818378	-0.28916	1410.23	2.67e-05	0.00015006
dHC enriched	ENSRNOG00000002360	14	39964588	40049354	+	Gabrg1	protein_coding	579.033	339.121	0.585669	-0.771843	459.077	1.75e-14	2.4e-13
dHC enriched	ENSRNOG00000007490	5	48303366	48341642	+	Gabrr2	protein_coding	28.3247	12.2487	0.43244	-1.20943	20.2867	0.00539381	0.0191522
dHC enriched	ENSRNOG00000018200	17	89171250	89238040	+	Gad2	protein_coding	3196.22	2412.07	0.754664	-0.406094	2804.14	7.37e-08	5.8e-07
dHC enriched	ENSRNOG00000019822	7	11646269	11648322	-	Gadd45b	protein_coding	67.3827	40.4114	0.59973	-0.737616	53.8971	0.00488233	0.0175608
dHC enriched	ENSRNOG00000015156	1	218652917	218657925	-	Gal	protein_coding	21.2728	1.93834	0.0911182	-3.45612	11.6056	5.63e-07	3.98e-06
dHC enriched	ENSRNOG00000042041	14	84231639	84247369	+	Gal3st1	protein_coding	72.1784	44.2509	0.613077	-0.70586	58.2146	0.00742429	0.0253318
dHC enriched	ENSRNOG00000028743	1	220668544	220678299	+	Gal3st3	protein_coding	1274.45	464.211	0.364244	-1.45702	869.33	3.74e-65	3.56e-63
dHC enriched	ENSRNOG00000001375	12	19583110	19592000	-	Gal3st4	protein_coding	77.0099	39.452	0.512298	-0.964944	58.2309	0.00014935	0.00074651
dHC enriched	ENSRNOG00000016207	18	16146447	16185496	+	Galnt1	protein_coding	511.381	339.084	0.663076	-0.592754	425.232	1.02e-08	8.79e-08
dHC enriched	ENSRNOG00000002488	10	43067299	43210427	+	Galnt10	protein_coding	126.638	43.9807	0.347294	-1.52577	85.3096	2.09e-12	2.48e-11
dHC enriched	ENSRNOG00000017021	1	176296193	176607466	-	Galnt18	protein_coding	742.726	289.709	0.390062	-1.35822	516.217	7.62e-35	2.77e-33
dHC enriched	ENSRNOG00000004645	3	44025300	44074678	+	Galnt5	protein_coding	31.3205	1.64857	0.0526355	-4.24782	16.4845	2.55e-11	2.78e-10
dHC enriched	ENSRNOG00000033059	7	142322172	142352382	-	Galnt6	protein_coding	130.367	78.8179	0.604584	-0.725986	104.593	0.00081369	0.00352886
dHC enriched	ENSRNOG00000037476	12	52106506	52187164	-	Galnt9	protein_coding	1545.67	1260.83	0.81572	-0.293854	1403.25	0.00067808	0.00298744
dHC enriched	ENSRNOG00000019724	1	225096598	225116378	+	Ganab	protein_coding	1860.16	1534.29	0.824815	-0.277857	1697.23	3.3e-05	0.00018244
dHC enriched	ENSRNOG00000048004	6	27631364	27643076	-	Gareml	protein_coding	165.378	83.2311	0.503278	-0.990572	124.305	9.71e-09	8.4e-08
dHC enriched	ENSRNOG00000025198	7	29959597	29986163	-	Gas2l3	protein_coding	28.0071	2.25356	0.0804638	-3.63552	15.1303	2.72e-09	2.5e-08
dHC enriched	ENSRNOG00000022173	16	21178138	21268504	+	Gatad2a	protein_coding	759.834	336.975	0.443485	-1.17304	548.405	5.2e-36	1.96e-34
dHC enriched	ENSRNOG00000000168	3	114711562	114728410	-	Gatm	protein_coding	1188.64	822.451	0.691924	-0.531314	1005.55	2.55e-12	3e-11
dHC enriched	ENSRNOG00000006740	14	84447885	84452367	+	Gatsl3	protein_coding	25.4698	13.0299	0.511583	-0.96696	19.2499	0.0265964	0.0750433
dHC enriched	ENSRNOG00000055451	2	27713880	27780119	+	Gcnt4	protein_coding	90.3484	62.5261	0.692056	-0.531039	76.4373	0.0200175	0.0591074
dHC enriched	ENSRNOG00000011535	19	49522054	49532811	-	Gcsh	protein_coding	350.982	237.523	0.676737	-0.563333	294.253	6.14e-05	0.0003287
dHC enriched	ENSRNOG00000051993	16	10250404	10263150	+	Gdf10	protein_coding	124.5	41.0888	0.330032	-1.59932	82.7942	4.07e-11	4.37e-10
dHC enriched	ENSRNOG00000007610	7	3306863	3315856	-	Gdf11	protein_coding	412.143	224.24	0.544084	-0.8781	318.192	1.41e-14	1.94e-13
dHC enriched	ENSRNOG00000002919	10	90990762	90999435	-	Gfap	protein_coding	9841.61	1662.44	0.168919	-2.56559	5752.02	1.61e-62	1.36e-60
dHC enriched	ENSRNOG00000014007	17	23823632	23923792	-	Gfod1	protein_coding	646.399	409.908	0.634141	-0.657125	528.153	5.63e-12	6.48e-11
dHC enriched	ENSRNOG00000017438	1	279207586	279277339	-	Gfra1	protein_coding	335.268	206.498	0.615919	-0.699188	270.883	6.7e-08	5.29e-07
dHC enriched	ENSRNOG00000032063	8	83236103	83280888	-	Gfral	protein_coding	21.2834	8.98882	0.422338	-1.24353	15.1361	0.0128131	0.0404452
dHC enriched	ENSRNOG00000027040	15	109307904	109316953	-	Ggact	protein_coding	107.249	63.4757	0.591854	-0.756686	85.3623	0.00030572	0.00144658
dHC enriched	ENSRNOG00000007351	5	34040258	34063361	+	Ggh	protein_coding	232.546	115.962	0.498662	-1.00387	174.254	4.47e-11	4.78e-10
dHC enriched	ENSRNOG00000019179	3	14614122	14644951	-	Ggta1	protein_coding	53.1106	24.1979	0.455613	-1.13412	38.6543	0.00017654	0.00087256
dHC enriched	ENSRNOG00000015654	2	53150370	53413638	-	Ghr	protein_coding	120.939	66.4693	0.54961	-0.863521	93.7043	5.94e-05	0.00031843
dHC enriched	ENSRNOG00000024119	2	113066885	113070261	+	Ghsr	protein_coding	37.4504	1.32747	0.035446	-4.81823	19.3889	2.34e-14	3.19e-13
dHC enriched	ENSRNOG00000003847	10	46783979	46810524	+	Gid4	protein_coding	1104.97	808.951	0.732105	-0.449877	956.958	8.2e-10	7.91e-09
dHC enriched	ENSRNOG00000017575	19	54151048	54163608	-	Gins2	protein_coding	478.501	200.407	0.418822	-1.25559	339.454	8.91e-26	2.29e-24
dHC enriched	ENSRNOG00000061270	10	62656000	62664466	-	Git1	protein_coding	7556.76	6034.5	0.798557	-0.324533	6795.63	1.29e-07	9.87e-07
dHC enriched	ENSRNOG00000001190	12	47590154	47631119	+	Git2	protein_coding	608.543	514.598	0.845622	-0.241915	561.571	0.0118431	0.0378485
dHC enriched	ENSRNOG00000000805	20	37876650	37889089	+	Gja1	protein_coding	3793.13	2115.93	0.557831	-0.842101	2954.53	1.45e-46	8.32e-45
dHC enriched	ENSRNOG00000003746	X	71272042	71279977	+	Gjb1	protein_coding	128.954	58.7767	0.455795	-1.13354	93.8654	8.06e-08	6.3e-07
dHC enriched	ENSRNOG00000008855	15	37377316	37383277	-	Gjb2	protein_coding	53.9878	23.2973	0.431528	-1.21247	38.6425	7.2e-05	0.00038018
dHC enriched	ENSRNOG00000022116	15	37400889	37410848	-	Gjb6	protein_coding	293.678	189.17	0.644142	-0.634549	241.424	9.8e-07	6.71e-06
dHC enriched	ENSRNOG00000038328	10	45526745	45534570	-	Gjc2	protein_coding	349.162	199.028	0.570015	-0.810927	274.095	0.00772602	0.0261951
dHC enriched	ENSRNOG00000001329	12	19166239	19167015	-	Gjc3	protein_coding	120.508	84.7093	0.702937	-0.508533	102.608	0.0142199	0.0443003
dHC enriched	ENSRNOG00000008337	3	105467480	105470475	-	Gjd2	protein_coding	79.3334	46.293	0.583525	-0.777133	62.8132	0.00142241	0.00585158
dHC enriched	ENSRNOG00000034116	X	54227397	54303864	-	Gk	protein_coding	220.506	157.078	0.712351	-0.489339	188.792	0.00226432	0.0088595
dHC enriched	ENSRNOG00000011599	1	248297331	248377093	-	Gldc	protein_coding	429.61	268.54	0.625079	-0.677891	349.075	4.98e-09	4.45e-08
dHC enriched	ENSRNOG00000007261	13	34829139	35048444	-	Gli2	protein_coding	57.4437	24.0197	0.418144	-1.25793	40.7317	3.06e-05	0.00017047
dHC enriched	ENSRNOG00000014395	17	52294942	52569036	-	Gli3	protein_coding	153.917	108.96	0.707914	-0.498354	131.439	0.00546001	0.0193354
dHC enriched	ENSRNOG00000014768	1	246380889	246785360	-	Glis3	protein_coding	73.9973	45.8133	0.619122	-0.691705	59.9053	0.00553323	0.0195786
dHC enriched	ENSRNOG00000000541	20	9273594	9291610	-	Glo1	protein_coding	1367.05	932.382	0.682039	-0.552073	1149.72	2.21e-12	2.61e-11
dHC enriched	ENSRNOG00000001192	12	47667556	47687707	+	Gltp	protein_coding	366.269	213.254	0.582234	-0.78033	289.762	1.53e-08	1.29e-07
dHC enriched	ENSRNOG00000011262	1	77869020	77893509	-	Gltscr1	protein_coding	313.242	252.519	0.806146	-0.310887	282.88	0.0127994	0.0404166
dHC enriched	ENSRNOG00000057367	16	10662021	10695557	+	Glud1	protein_coding	3622.34	2939.42	0.81147	-0.30139	3280.88	4.14e-08	3.34e-07
dHC enriched	ENSRNOG00000049560	13	71331052	71340229	+	Glul	protein_coding	8692.52	6359.9	0.731653	-0.450769	7526.21	2.5e-13	3.16e-12
dHC enriched	ENSRNOG00000052219	10	40438356	40450930	+	Gm2a	protein_coding	747.515	517.765	0.692649	-0.529805	632.64	1.33e-08	1.13e-07
dHC enriched	ENSRNOG00000010910	5	150405918	150439959	-	Gmeb1	protein_coding	258.954	205.123	0.792122	-0.336205	232.039	0.00911112	0.0301964
dHC enriched	ENSRNOG00000019946	9	82632230	82639821	+	Gmppa	protein_coding	278.32	210.744	0.757201	-0.401252	244.532	0.00217806	0.00856484
dHC enriched	ENSRNOG00000005446	7	11033317	11047437	+	Gna11	protein_coding	646.006	446.282	0.690833	-0.533591	546.144	2.02e-09	1.88e-08
dHC enriched	ENSRNOG00000001235	12	15890202	15971212	+	Gna12	protein_coding	2705.36	1668.02	0.616559	-0.697688	2186.69	1.02e-15	1.5e-14
dHC enriched	ENSRNOG00000036745	10	97647111	97684730	+	Gna13	protein_coding	532.99	348.218	0.653329	-0.614119	440.604	6.33e-10	6.16e-09
dHC enriched	ENSRNOG00000014840	1	235166718	235347937	+	Gna14	protein_coding	113.662	67.2505	0.59167	-0.757136	90.4564	0.00081413	0.0035299
dHC enriched	ENSRNOG00000016592	8	116370744	116391307	-	Gnai2	protein_coding	2505.26	2226.27	0.888641	-0.170328	2365.77	0.00407244	0.0149352
dHC enriched	ENSRNOG00000019465	2	210896656	210934749	-	Gnai3	protein_coding	446.045	307.207	0.688735	-0.537978	376.626	4.97e-07	3.54e-06
dHC enriched	ENSRNOG00000010440	18	62805410	62944630	+	Gnal	protein_coding	381.168	273.476	0.717468	-0.479013	327.322	0.00020875	0.00101918
dHC enriched	ENSRNOG00000014183	1	233382708	233622786	+	Gnaq	protein_coding	1034.53	863.415	0.834597	-0.260848	948.971	0.00116217	0.00486239
dHC enriched	ENSRNOG00000049070	12	35905358	35906382	-	Gnb2l1	protein_coding	34.8504	0.319142	0.0091575	-6.77083	17.5848	2.55e-15	3.66e-14
dHC enriched	ENSRNOG00000025040	5	76182121	76189013	+	Gng10	protein_coding	701.587	481.235	0.685923	-0.543881	591.411	3.13e-09	2.85e-08
dHC enriched	ENSRNOG00000048980	15	4850122	4853555	+	Gng2	protein_coding	3078.17	2232.77	0.725358	-0.463236	2655.47	3.56e-15	5.06e-14
dHC enriched	ENSRNOG00000015936	2	252359976	252368473	+	Gng5	protein_coding	172.033	103.458	0.601386	-0.733637	137.746	7.6e-06	4.6e-05
dHC enriched	ENSRNOG00000019857	7	11582984	11628929	+	Gng7	protein_coding	2030.19	629.195	0.30992	-1.69003	1329.69	1.52e-82	2.14e-80
dHC enriched	ENSRNOG00000002177	14	62628111	62646110	-	Gnpda2	protein_coding	124.089	78.8238	0.635218	-0.654676	101.457	0.00052946	0.00239212
dHC enriched	ENSRNOG00000002011	14	23480462	23498450	+	Gnrhr	protein_coding	18.1613	4.97508	0.273939	-1.86807	11.5682	0.00151347	0.00621281
dHC enriched	ENSRNOG00000018400	17	5382034	5409038	+	Golm1	protein_coding	180.108	137.982	0.766107	-0.384382	159.045	0.0126676	0.0400814
dHC enriched	ENSRNOG00000001037	15	58153275	58171049	-	Gpalpp1	protein_coding	177.947	130.84	0.735274	-0.443646	154.393	0.00847308	0.0283204
dHC enriched	ENSRNOG00000015124	1	275846819	275906686	-	Gpam	protein_coding	913.291	737.663	0.807698	-0.308112	825.477	0.00036561	0.00170884
dHC enriched	ENSRNOG00000049437	9	99998275	100026818	+	Gpc1	protein_coding	1988.8	1219.03	0.612949	-0.70616	1603.91	3.88e-20	7.53e-19
dHC enriched	ENSRNOG00000060179	X	139579268	139916883	-	Gpc3	protein_coding	115.375	50.3556	0.436452	-1.1961	82.8652	4.98e-07	3.55e-06
dHC enriched	ENSRNOG00000002413	X	139354155	139464798	-	Gpc4	protein_coding	488.568	295.467	0.604762	-0.725562	392.018	8.33e-11	8.67e-10
dHC enriched	ENSRNOG00000056457	7	141370491	141377928	+	Gpd1	protein_coding	601.591	447.659	0.744124	-0.426385	524.625	0.0003317	0.00156081
dHC enriched	ENSRNOG00000033824	3	43255567	43359074	+	Gpd2	protein_coding	823.355	556.094	0.6754	-0.566185	689.724	2.02e-10	2.03e-09
dHC enriched	ENSRNOG00000028366	6	101532518	101859164	+	Gphn	protein_coding	755.559	648.95	0.8589	-0.219437	702.254	0.00746287	0.0254483
dHC enriched	ENSRNOG00000017702	17	42085028	42127678	-	Gpld1	protein_coding	423.644	343.748	0.811407	-0.301502	383.696	0.00490783	0.0176342
dHC enriched	ENSRNOG00000004613	X	29607075	29648403	-	Gpm6b	protein_coding	5110.19	4146.39	0.811397	-0.30152	4628.29	4.52e-06	2.81e-05
dHC enriched	ENSRNOG00000001278	12	39670453	39679510	-	Gpn3	protein_coding	245.59	200.696	0.817201	-0.291237	223.143	0.0283198	0.0792378
dHC enriched	ENSRNOG00000008816	4	78694447	78715683	+	Gpnmb	protein_coding	148.15	104.359	0.704413	-0.505506	126.255	0.00255739	0.00986921
dHC enriched	ENSRNOG00000027658	X	140299770	140303686	-	Gpr101	protein_coding	19.0647	1.38621	0.072711	-3.78168	10.2254	1.03e-06	7.03e-06
dHC enriched	ENSRNOG00000039832	12	10254951	10257130	+	Gpr12	protein_coding	209.016	77.0559	0.36866	-1.43964	143.036	6.59e-17	1.04e-15
dHC enriched	ENSRNOG00000018485	3	60051535	60105242	-	Gpr155	protein_coding	1264.07	351.879	0.278371	-1.84492	807.972	4.24e-74	4.9e-72
dHC enriched	ENSRNOG00000003073	13	83531018	83571505	+	Gpr161	protein_coding	371.803	55.9083	0.150371	-2.73341	213.856	4.1e-55	2.89e-53
dHC enriched	ENSRNOG00000025745	18	24734330	24735349	-	Gpr17	protein_coding	228.01	163.882	0.718747	-0.476445	195.946	0.00217589	0.00856024
dHC enriched	ENSRNOG00000005971	3	110042853	110140756	-	Gpr176	protein_coding	376.395	250.893	0.666569	-0.585175	313.644	1.49e-06	9.96e-06
dHC enriched	ENSRNOG00000008423	6	51011426	51019407	-	Gpr22	protein_coding	936.295	622.428	0.664778	-0.589056	779.361	2.25e-11	2.47e-10
dHC enriched	ENSRNOG00000002524	4	51822153	51844331	-	Gpr37	protein_coding	1300.4	668.444	0.514028	-0.96008	984.424	2.09e-06	1.37e-05
dHC enriched	ENSRNOG00000006237	13	51985684	51992693	-	Gpr37l1	protein_coding	2605.33	1388.42	0.532915	-0.908022	1996.88	9.36e-40	4.15e-38
dHC enriched	ENSRNOG00000022567	8	115166410	115167486	-	Gpr62	protein_coding	47.4109	28.6952	0.605244	-0.72441	38.0531	0.0190265	0.0567461
dHC enriched	ENSRNOG00000007675	5	39329423	39370900	+	Gpr63	protein_coding	137.625	55.7165	0.404842	-1.30457	96.6708	1.02e-10	1.06e-09
dHC enriched	ENSRNOG00000016013	1	188688743	188713280	-	Gprc5b	protein_coding	1981.3	1218.87	0.615188	-0.700902	1600.09	7.64e-25	1.86e-23
dHC enriched	ENSRNOG00000012149	2	211480400	211527919	-	Gpsm2	protein_coding	132.872	83.3818	0.627534	-0.672234	108.127	0.00030415	0.0014415
dHC enriched	ENSRNOG00000033915	7	117759083	117761931	+	Gpt	protein_coding	233.083	157.867	0.677301	-0.562132	195.475	5.15e-05	0.00027813
dHC enriched	ENSRNOG00000059579	19	22590881	22632071	-	Gpt2	protein_coding	343.818	247.083	0.718647	-0.476645	295.451	4.66e-05	0.00025303
dHC enriched	ENSRNOG00000048812	8	117117430	117118522	+	Gpx1	protein_coding	363.002	205.611	0.566417	-0.820063	284.307	1.55e-11	1.72e-10
dHC enriched	ENSRNOG00000010461	2	44903337	44907030	-	Gpx8	protein_coding	114.473	62.1482	0.542907	-0.881224	88.3107	1.75e-05	0.0001009
dHC enriched	ENSRNOG00000053577	8	44165367	44327551	-	Gramd1b	protein_coding	1130.1	967.039	0.855713	-0.224801	1048.57	0.00391201	0.0144052
dHC enriched	ENSRNOG00000015225	18	51492196	51591026	+	Gramd3	protein_coding	439.772	266.138	0.605172	-0.724582	352.955	1.59e-10	1.61e-09
dHC enriched	ENSRNOG00000018316	7	121841855	121864679	+	Grap2	protein_coding	23.4121	9.72107	0.415215	-1.26807	16.5666	0.00922376	0.030527
dHC enriched	ENSRNOG00000023492	18	1723565	1784233	+	Greb1l	protein_coding	85.8918	51.9279	0.604574	-0.72601	68.9098	0.00218538	0.00858775
dHC enriched	ENSRNOG00000026053	3	105203309	105214989	-	Grem1	protein_coding	98.7412	54.2891	0.549812	-0.862989	76.5152	7.43e-05	0.00039133
dHC enriched	ENSRNOG00000054989	6	43743702	43794342	+	Grhl1	protein_coding	80.1939	49.4433	0.616548	-0.697716	64.8186	0.00320611	0.0120773
dHC enriched	ENSRNOG00000012794	5	60528981	60538399	+	Grhpr	protein_coding	291.964	123.182	0.42191	-1.24499	207.573	9.62e-19	1.72e-17
dHC enriched	ENSRNOG00000045816	10	42614713	42760200	+	Gria1	protein_coding	5818.3	2404.39	0.413247	-1.27493	4111.35	1.61e-113	4.21e-111
dHC enriched	ENSRNOG00000054204	2	179584308	179704629	-	Gria2	protein_coding	7868.93	6319.59	0.803107	-0.316336	7094.26	3.49e-07	2.53e-06
dHC enriched	ENSRNOG00000030910	8	46806147	47094352	-	Grik4	protein_coding	905.931	352.202	0.388774	-1.363	629.067	6.69e-38	2.73e-36
dHC enriched	ENSRNOG00000033942	10	5930298	6119990	+	Grin2a	protein_coding	2161.3	1041.13	0.481714	-1.05375	1601.21	6.49e-31	2.11e-29
dHC enriched	ENSRNOG00000003280	10	103798291	103816287	-	Grin2c	protein_coding	1026.51	568.589	0.553905	-0.852289	797.549	8.73e-23	1.94e-21
dHC enriched	ENSRNOG00000012562	7	12764993	12771309	+	Grin3b	protein_coding	34.2718	15.1445	0.441894	-1.17823	24.7082	0.00242592	0.00941041
dHC enriched	ENSRNOG00000029941	7	117304742	117307916	+	Grina	protein_coding	6547.43	4591.31	0.701238	-0.512023	5569.37	1.86e-21	3.86e-20
dHC enriched	ENSRNOG00000018430	16	81153489	81165442	+	Grk1	protein_coding	18.6107	7.63001	0.40998	-1.28637	13.1203	0.0150419	0.0464991
dHC enriched	ENSRNOG00000014290	1	4753144	5165859	-	Grm1	protein_coding	777.569	509.583	0.655355	-0.609652	643.576	1.1e-11	1.24e-10
dHC enriched	ENSRNOG00000007728	7	116889572	116894134	+	Gsdmd	protein_coding	65.0774	28.5523	0.438744	-1.18855	46.8149	4.58e-05	0.00024896
dHC enriched	ENSRNOG00000017489	19	54060622	54148970	+	Gse1	protein_coding	607.224	280.419	0.461805	-1.11464	443.822	9.27e-21	1.85e-19
dHC enriched	ENSRNOG00000048660	10	59695913	59698168	-	Gsg2	protein_coding	23.262	8.15277	0.350476	-1.51261	15.7074	0.00182752	0.00732372
dHC enriched	ENSRNOG00000018991	3	14467330	14508911	+	Gsn	protein_coding	1239.01	756.689	0.610722	-0.711413	997.849	0.00325846	0.0122504
dHC enriched	ENSRNOG00000011669	2	238109490	238253287	-	Gstcd	protein_coding	32.2818	17.1749	0.532031	-0.910419	24.7283	0.01814	0.0545183
dHC enriched	ENSRNOG00000029726	2	210803869	210809306	-	Gstm1	protein_coding	1868.44	960.878	0.514268	-0.959408	1414.66	1.2e-31	4.04e-30
dHC enriched	ENSRNOG00000018937	2	210720704	210782856	-	Gstm2	protein_coding	1925.75	1545.17	0.802373	-0.317656	1735.46	2.74e-06	1.76e-05
dHC enriched	ENSRNOG00000018937	2	210720704	210782856	-	Gstm2	protein_coding	1925.75	1545.17	0.802373	-0.317656	1735.46	2.74e-06	1.76e-05
dHC enriched	ENSRNOG00000049743	2	210685197	210688272	+	Gstm5	protein_coding	694.392	491.11	0.707252	-0.499703	592.751	4.95e-08	3.96e-07
dHC enriched	ENSRNOG00000049743	2	210685197	210688272	+	Gstm5	protein_coding	694.392	491.11	0.707252	-0.499703	592.751	4.95e-08	3.96e-07
dHC enriched	ENSRNOG00000019017	2	210733594	210738378	-	Gstm6	protein_coding	116.536	5.55659	0.0476812	-4.39044	61.0464	1.97e-33	6.92e-32
dHC enriched	ENSRNOG00000028746	1	267607418	267617387	+	Gsto1	protein_coding	764.757	639.889	0.836721	-0.257181	702.323	0.0044716	0.0162295
dHC enriched	ENSRNOG00000052415	20	13760810	13764475	+	Gstt2	protein_coding	73.991	40.1726	0.542939	-0.881137	57.0818	0.00073197	0.00319467
dHC enriched	ENSRNOG00000001242	20	13817795	13825475	+	Gstt3	protein_coding	460.172	277.341	0.602689	-0.730513	368.756	2.5e-09	2.31e-08
dHC enriched	ENSRNOG00000026008	11	66078820	66110848	+	Gtf2e1	protein_coding	183.481	144.598	0.788084	-0.343578	164.039	0.0235261	0.0678032
dHC enriched	ENSRNOG00000029316	15	57942059	58068892	-	Gtf2f2	protein_coding	151.32	115.218	0.761417	-0.393241	133.269	0.017329	0.052429
dHC enriched	ENSRNOG00000056904	6	26560601	26584535	+	Gtf3c2	protein_coding	592.591	487.482	0.822628	-0.281687	540.037	0.00346074	0.0129458
dHC enriched	ENSRNOG00000016148	7	126736732	126753220	+	Gtse1	protein_coding	36.5104	19.4245	0.532025	-0.910433	27.9675	0.0141545	0.0441365
dHC enriched	ENSRNOG00000002928	10	45535627	45543897	-	Guk1	protein_coding	1892.1	1552.43	0.82048	-0.28546	1722.27	1.84e-05	0.00010573
dHC enriched	ENSRNOG00000011146	2	104916738	104958034	-	Gyg1	protein_coding	366.331	251.285	0.68595	-0.543824	308.808	3.47e-06	2.19e-05
dHC enriched	ENSRNOG00000020812	1	101427195	101447092	+	Gys1	protein_coding	320.46	253.198	0.790109	-0.339877	286.829	0.00450036	0.0163132
dHC enriched	ENSRNOG00000004735	3	143003796	143015904	+	Gzf1	protein_coding	264.31	217.303	0.822154	-0.28252	240.807	0.0265411	0.0749233
dHC enriched	ENSRNOG00000027722	4	119889371	119889949	-	H1fx	protein_coding	192.109	132.156	0.68792	-0.539687	162.132	0.00167608	0.00679437
dHC enriched	ENSRNOG00000052275	14	86687782	86706626	-	H2afv	protein_coding	193.856	125.732	0.648582	-0.624639	159.794	7.61e-05	0.00040006
dHC enriched	ENSRNOG00000052275	14	86687782	86706626	-	H2afv	protein_coding	193.856	125.732	0.648582	-0.624639	159.794	7.61e-05	0.00040006
dHC enriched	ENSRNOG00000052275	14	86687782	86706626	-	H2afv	protein_coding	193.856	125.732	0.648582	-0.624639	159.794	7.61e-05	0.00040006
dHC enriched	ENSRNOG00000052275	14	86687782	86706626	-	H2afv	protein_coding	193.856	125.732	0.648582	-0.624639	159.794	7.61e-05	0.00040006
dHC enriched	ENSRNOG00000006532	10	104573664	104575890	-	H3f3a	protein_coding	1505.72	1171.73	0.778188	-0.36181	1338.73	9.92e-08	7.69e-07
dHC enriched	ENSRNOG00000003220	13	99091763	99101208	-	H3f3b	protein_coding	1031.51	736.357	0.713867	-0.486273	883.931	3.6e-10	3.56e-09
dHC enriched	ENSRNOG00000030232	8	70471572	70509874	-	Hacd3	protein_coding	1655.15	1322.07	0.79876	-0.324167	1488.61	5.3e-07	3.76e-06
dHC enriched	ENSRNOG00000010697	2	236353445	236395067	-	Hadh	protein_coding	143.977	79.045	0.54901	-0.865095	111.511	4.45e-06	2.77e-05
dHC enriched	ENSRNOG00000010800	6	27555412	27582995	-	Hadhb	protein_coding	936.263	793.681	0.847712	-0.238354	864.972	0.00167919	0.0068038
dHC enriched	ENSRNOG00000032002	2	18354542	18419071	+	Hapln1	protein_coding	578.931	326.8	0.564489	-0.824982	452.865	6.33e-16	9.44e-15
dHC enriched	ENSRNOG00000018870	2	187396349	187401786	-	Hapln2	protein_coding	277.898	119.766	0.43097	-1.21434	198.832	1.11e-15	1.63e-14
dHC enriched	ENSRNOG00000049949	16	21081377	21089508	-	Hapln4	protein_coding	5172.67	1324.91	0.256136	-1.96502	3248.79	2.21e-236	2.54e-233
dHC enriched	ENSRNOG00000029886	10	15602794	15603649	-	Hba-a3	protein_coding	664.104	571.876	0.861125	-0.215706	617.99	0.0219608	0.0639797
dHC enriched	ENSRNOG00000018646	18	29329764	29340403	-	Hbegf	protein_coding	83.474	44.7346	0.53591	-0.899937	64.1043	0.00055418	0.00248616
dHC enriched	ENSRNOG00000011251	8	83307684	83421612	-	Hcrtr2	protein_coding	23.4547	12.1097	0.516302	-0.953714	17.7822	0.0299252	0.0828713
dHC enriched	ENSRNOG00000009568	5	147716664	147743723	-	Hdac1	protein_coding	276.788	218.897	0.790849	-0.338526	247.842	0.00903609	0.0299866
dHC enriched	ENSRNOG00000000604	20	43084870	43108198	-	Hdac2	protein_coding	871.805	761.542	0.873523	-0.195082	816.673	0.0207207	0.0609225
dHC enriched	ENSRNOG00000003122	X	72163777	72370044	-	Hdac8	protein_coding	117.276	79.4171	0.677178	-0.562392	98.3468	0.00375146	0.0138913
dHC enriched	ENSRNOG00000010262	3	119057517	119075619	-	Hdc	protein_coding	19.9151	0.346553	0.0174015	-5.84464	10.1308	3.36e-09	3.05e-08
dHC enriched	ENSRNOG00000015195	5	78358203	78361647	-	Hdhd3	protein_coding	108.713	77.7841	0.715501	-0.482974	93.2484	0.018064	0.0543468
dHC enriched	ENSRNOG00000056753	1	255185629	255254307	+	Hectd2	protein_coding	566.697	323.889	0.571537	-0.80708	445.293	2.72e-14	3.69e-13
dHC enriched	ENSRNOG00000001793	11	70236888	70322690	-	Heg1	protein_coding	604.766	317.357	0.52476	-0.93027	461.062	1.27e-17	2.1e-16
dHC enriched	ENSRNOG00000009219	8	39848448	39865130	+	Hepacam	protein_coding	418.44	264.769	0.632754	-0.660284	341.604	6.81e-09	5.98e-08
dHC enriched	ENSRNOG00000012294	X	65563122	65658516	+	Heph	protein_coding	38.0182	19.2679	0.506806	-0.980495	28.6431	0.0118547	0.0378788
dHC enriched	ENSRNOG00000013850	5	172364421	172365188	+	Hes5	protein_coding	121.016	87.5111	0.723139	-0.467655	104.263	0.0148637	0.0460725
dHC enriched	ENSRNOG00000003203	10	91200874	91202984	+	Hexim1	protein_coding	489.598	369.768	0.755249	-0.404975	429.683	0.00015633	0.00077915
dHC enriched	ENSRNOG00000011593	2	95320283	95322696	+	Hey1	protein_coding	154.453	63.09	0.408474	-1.29169	108.772	3.01e-11	3.27e-10
dHC enriched	ENSRNOG00000016967	17	43661222	43669985	+	Hfe	protein_coding	37.9452	9.67992	0.255103	-1.97085	23.8125	4.21e-06	2.63e-05
dHC enriched	ENSRNOG00000019404	8	130422066	130429132	-	Hhatl	protein_coding	64.9088	41.7682	0.643492	-0.636007	53.3385	0.0149991	0.0464083
dHC enriched	ENSRNOG00000018268	19	31524671	31614246	+	Hhip	protein_coding	113.621	58.5045	0.514908	-0.957612	86.0628	2.05e-05	0.00011707
dHC enriched	ENSRNOG00000008063	4	82604373	82702429	-	Hibadh	protein_coding	481.568	402.015	0.834806	-0.260488	441.792	0.0067308	0.0231957
dHC enriched	ENSRNOG00000028557	9	53446194	53526728	-	Hibch	protein_coding	185.354	145.186	0.783288	-0.352386	165.27	0.0203135	0.0598684
dHC enriched	ENSRNOG00000017372	17	10558714	10559627	-	Higd2a	protein_coding	561.022	466.795	0.832044	-0.265269	513.909	0.00666646	0.022997
dHC enriched	ENSRNOG00000007034	4	66445266	66624912	-	Hipk2	protein_coding	630.097	518.312	0.82259	-0.281754	574.205	0.00829124	0.0278262
dHC enriched	ENSRNOG00000020835	1	84328114	84338483	+	Hipk4	protein_coding	636.271	207.982	0.326876	-1.61318	422.127	3.95e-53	2.64e-51
dHC enriched	ENSRNOG00000054017	17	44522140	44526583	+	Hist1h4m	protein_coding	65.3987	19.7299	0.301687	-1.72888	42.5643	3.74e-08	3.03e-07
dHC enriched	ENSRNOG00000054017	17	44522140	44526583	+	Hist1h4m	protein_coding	65.3987	19.7299	0.301687	-1.72888	42.5643	3.74e-08	3.03e-07
dHC enriched	ENSRNOG00000054017	17	44522140	44526583	+	Hist1h4m	protein_coding	65.3987	19.7299	0.301687	-1.72888	42.5643	3.74e-08	3.03e-07
dHC enriched	ENSRNOG00000054017	17	44522140	44526583	+	Hist1h4m	protein_coding	65.3987	19.7299	0.301687	-1.72888	42.5643	3.74e-08	3.03e-07
dHC enriched	ENSRNOG00000054017	17	44522140	44526583	+	Hist1h4m	protein_coding	65.3987	19.7299	0.301687	-1.72888	42.5643	3.74e-08	3.03e-07
dHC enriched	ENSRNOG00000054017	17	44522140	44526583	+	Hist1h4m	protein_coding	65.3987	19.7299	0.301687	-1.72888	42.5643	3.74e-08	3.03e-07
dHC enriched	ENSRNOG00000054017	17	44522140	44526583	+	Hist1h4m	protein_coding	65.3987	19.7299	0.301687	-1.72888	42.5643	3.74e-08	3.03e-07
dHC enriched	ENSRNOG00000054017	17	44522140	44526583	+	Hist1h4m	protein_coding	65.3987	19.7299	0.301687	-1.72888	42.5643	3.74e-08	3.03e-07
dHC enriched	ENSRNOG00000000082	2	104854572	104914173	+	Hltf	protein_coding	343.348	269.01	0.783491	-0.352012	306.179	0.002801	0.0107156
dHC enriched	ENSRNOG00000019120	2	200452624	200479423	+	Hmgcs2	protein_coding	107.082	60.5545	0.565495	-0.822415	83.8184	7.03e-05	0.00037246
dHC enriched	ENSRNOG00000049192	X	80134557	80142902	-	Hmgn5	protein_coding	19.0437	3.96087	0.207989	-2.26542	11.5023	0.0001385	0.00069676
dHC enriched	ENSRNOG00000014117	19	14508616	14515456	+	Hmox1	protein_coding	61.6359	26.2772	0.42633	-1.22996	43.9565	1.85e-05	0.00010654
dHC enriched	ENSRNOG00000003661	10	104057697	104075777	-	Hn1	protein_coding	1145.38	860.669	0.751428	-0.412292	1003.02	2.05e-08	1.71e-07
dHC enriched	ENSRNOG00000011175	4	81237496	81241282	-	Hnrnpa2b1	protein_coding	2573.77	2307.36	0.89649	-0.157641	2440.56	0.0080582	0.0271554
dHC enriched	ENSRNOG00000014562	4	149957206	149978895	+	Hnrnpf	protein_coding	769.199	569.654	0.740581	-0.433271	669.427	3.31e-07	2.41e-06
dHC enriched	ENSRNOG00000007921	7	18516512	18554227	-	Hnrnpm	protein_coding	974.14	844.859	0.867288	-0.205418	909.5	0.00800862	0.027025
dHC enriched	ENSRNOG00000029501	1	261291870	261318984	+	Hoga1	protein_coding	59.9444	22.379	0.373329	-1.42148	41.1617	2.74e-06	1.76e-05
dHC enriched	ENSRNOG00000061450	1	143443300	143535583	-	Homer2	protein_coding	182.349	118.979	0.652478	-0.615998	150.664	0.00036177	0.00169225
dHC enriched	ENSRNOG00000020229	16	20881518	20890949	-	Homer3	protein_coding	717.987	52.8501	0.0736086	-3.76398	385.419	7.98e-129	2.64e-126
dHC enriched	ENSRNOG00000006979	5	147294820	147303346	-	Hpca	protein_coding	5337.32	1142.25	0.214012	-2.22424	3239.78	2.53e-239	3.11e-236
dHC enriched	ENSRNOG00000000661	12	50285278	50314406	-	Hps4	protein_coding	447.872	356.306	0.795553	-0.32997	402.089	0.00190151	0.00759368
dHC enriched	ENSRNOG00000011427	15	52241801	52261276	+	Hr	protein_coding	357.333	174.95	0.489599	-1.03033	266.141	1.54e-15	2.25e-14
dHC enriched	ENSRNOG00000018260	17	10921507	10952441	-	Hrh2	protein_coding	68.5306	37.7291	0.550544	-0.861071	53.1299	0.00091637	0.00392566
dHC enriched	ENSRNOG00000005437	7	73256508	73270308	-	Hrsp12	protein_coding	288.492	156.336	0.541908	-0.883881	222.414	1.99e-11	2.18e-10
dHC enriched	ENSRNOG00000010598	14	75852060	75882693	+	Hs3st1	protein_coding	246.736	170.924	0.692742	-0.52961	208.83	0.000514	0.00232715
dHC enriched	ENSRNOG00000048243	15	105253485	105254198	+	Hs6st3	protein_coding	162.837	101.833	0.62537	-0.677218	132.335	0.00015684	0.00078146
dHC enriched	ENSRNOG00000005861	13	111926442	111972603	-	Hsd11b1	protein_coding	602.085	211.667	0.351556	-1.50817	406.876	1.22e-44	6.58e-43
dHC enriched	ENSRNOG00000002210	14	7073445	7104566	+	Hsd17b11	protein_coding	491.721	152.185	0.309494	-1.69202	321.953	4.87e-42	2.37e-40
dHC enriched	ENSRNOG00000015840	18	44810388	44897640	+	Hsd17b4	protein_coding	578.212	439.322	0.759793	-0.396321	508.767	2.38e-05	0.0001345
dHC enriched	ENSRNOG00000000808	20	38935820	38963309	+	Hsf2	protein_coding	364.613	282.304	0.774258	-0.369113	323.459	0.00096887	0.00413204
dHC enriched	ENSRNOG00000047966	20	4959294	4964963	+	Hspa1l	protein_coding	26.9161	9.86009	0.366327	-1.4488	18.3881	0.00138463	0.00570982
dHC enriched	ENSRNOG00000006472	6	99433550	99436289	+	Hspa2	protein_coding	224.613	131.776	0.58668	-0.769354	178.194	2.15e-07	1.6e-06
dHC enriched	ENSRNOG00000016596	10	38601624	38642397	-	Hspa4	protein_coding	3106.33	2823.32	0.908893	-0.137817	2964.83	0.0201533	0.0594676
dHC enriched	ENSRNOG00000018294	3	13838304	13842762	+	Hspa5	protein_coding	2511.28	2158.87	0.859672	-0.218142	2335.07	0.00024611	0.00118507
dHC enriched	ENSRNOG00000023546	12	23839399	23841049	-	Hspb1	protein_coding	42.7691	25.6624	0.600022	-0.736914	34.2158	0.0256424	0.0726978
dHC enriched	ENSRNOG00000010402	8	55176847	55177818	-	Hspb2	protein_coding	18.3382	3.96087	0.21599	-2.21096	11.1495	0.00027454	0.00130987
dHC enriched	ENSRNOG00000020922	1	89008117	89010256	+	Hspb6	protein_coding	213.657	154.703	0.724072	-0.465794	184.18	0.00184969	0.00740148
dHC enriched	ENSRNOG00000000902	12	6322668	6341902	-	Hsph1	protein_coding	3761.11	3414.52	0.907849	-0.139476	3587.82	0.0112237	0.0361106
dHC enriched	ENSRNOG00000027761	X	159513800	159528281	+	Htatsf1	protein_coding	604.43	517.783	0.856648	-0.223226	561.106	0.0158721	0.0486459
dHC enriched	ENSRNOG00000010254	2	36246628	36247896	+	Htr1a	protein_coding	194.659	99.2957	0.510102	-0.971143	146.977	8.89e-09	7.71e-08
dHC enriched	ENSRNOG00000013042	8	89129453	89130991	-	Htr1b	protein_coding	164.117	110.419	0.672806	-0.571738	137.268	0.00178471	0.0071806
dHC enriched	ENSRNOG00000019134	18	57654290	57819698	+	Htr4	protein_coding	63.0188	5.1787	0.0821769	-3.60512	34.0988	8.71e-18	1.46e-16
dHC enriched	ENSRNOG00000020533	1	201499028	201548513	+	Htra1	protein_coding	994.05	633.85	0.637644	-0.649176	813.95	2.04e-13	2.6e-12
dHC enriched	ENSRNOG00000022448	4	113883670	113886994	-	Htra2	protein_coding	430.703	361.755	0.839916	-0.251682	396.229	0.0155817	0.0478923
dHC enriched	ENSRNOG00000008182	14	80248140	80276534	+	Htra3	protein_coding	87.0536	43.9572	0.504944	-0.985804	65.5054	3.44e-05	0.00019018
dHC enriched	ENSRNOG00000002092	11	30550141	30663465	+	Hunk	protein_coding	181.828	125.481	0.690109	-0.535103	153.654	0.00340625	0.0127642
dHC enriched	ENSRNOG00000017178	19	41036510	41379588	-	Hydin	protein_coding	81.3038	53.8701	0.662579	-0.593836	67.587	0.0127314	0.0402389
dHC enriched	ENSRNOG00000008628	4	34635506	34780193	-	Ica1	protein_coding	491.487	417.679	0.849827	-0.234759	454.583	0.0153041	0.0471994
dHC enriched	ENSRNOG00000020694	8	22050222	22057209	+	Icam5	protein_coding	4514.35	1955.1	0.433085	-1.20728	3234.72	3.26e-82	4.52e-80
dHC enriched	ENSRNOG00000023109	20	11329992	11340296	-	Icoslg	protein_coding	96.4387	68.253	0.707735	-0.498719	82.3459	0.0155025	0.0477046
dHC enriched	ENSRNOG00000026124	5	154489590	154491223	+	Id3	protein_coding	437.031	153.867	0.352073	-1.50605	295.449	3.87e-22	8.38e-21
dHC enriched	ENSRNOG00000016099	17	16692557	16695126	-	Id4	protein_coding	311.955	197.429	0.632876	-0.660006	254.692	1.68e-07	1.27e-06
dHC enriched	ENSRNOG00000013949	1	141866283	141893705	-	Idh2	protein_coding	451.975	336.37	0.744223	-0.426192	394.173	6.36e-05	0.00033978
dHC enriched	ENSRNOG00000009263	6	127327959	127334428	+	Ifi27	protein_coding	325.152	197.611	0.607749	-0.718453	261.381	1.35e-08	1.15e-07
dHC enriched	ENSRNOG00000022218	2	256897772	256915569	-	Ifi44	protein_coding	43.8598	26.9018	0.613359	-0.705197	35.3808	0.030064	0.0831754
dHC enriched	ENSRNOG00000015078	1	213810696	213811901	-	Ifitm3	protein_coding	45.1295	28.7285	0.63658	-0.651586	36.929	0.0336198	0.091579
dHC enriched	ENSRNOG00000050997	6	60132024	60151420	-	Ifrd1	protein_coding	417.311	293.827	0.704095	-0.506158	355.569	1.66e-06	1.1e-05
dHC enriched	ENSRNOG00000030800	8	70630767	70684115	+	Igdcc3	protein_coding	94.7864	32.4211	0.342044	-1.54774	63.6038	2.54e-08	2.1e-07
dHC enriched	ENSRNOG00000033496	8	70603249	70624925	+	Igdcc4	protein_coding	992.484	706.254	0.711603	-0.490856	849.369	5.81e-10	5.67e-09
dHC enriched	ENSRNOG00000020369	1	215828102	215846911	-	Igf2	protein_coding	251.104	57.9407	0.230743	-2.11564	154.522	3.31e-10	3.29e-09
dHC enriched	ENSRNOG00000014997	1	48176106	48264477	+	Igf2r	protein_coding	964.415	727.989	0.75485	-0.405737	846.202	2.96e-07	2.17e-06
dHC enriched	ENSRNOG00000016957	9	80118029	80144789	+	Igfbp2	protein_coding	97.2612	54.3871	0.559185	-0.838601	75.8241	0.00076748	0.00333516
dHC enriched	ENSRNOG00000017206	9	80150211	80167033	-	Igfbp5	protein_coding	1277.45	760.573	0.595383	-0.748109	1019.01	7.48e-22	1.58e-20
dHC enriched	ENSRNOG00000002050	14	33010300	33070190	+	Igfbp7	protein_coding	379.199	304.38	0.802691	-0.317083	341.789	0.00460831	0.0166729
dHC enriched	ENSRNOG00000001525	11	64286694	64421248	-	Igsf11	protein_coding	717.662	505.679	0.704621	-0.505081	611.671	2.74e-08	2.25e-07
dHC enriched	ENSRNOG00000007200	10	86421582	86509454	-	Ikzf3	protein_coding	21.9874	6.96432	0.316741	-1.65862	14.4759	0.00141281	0.00581626
dHC enriched	ENSRNOG00000011680	1	145781928	145870912	-	Il16	protein_coding	699.053	83.2311	0.119063	-3.07021	391.142	4e-97	7.17e-95
dHC enriched	ENSRNOG00000027376	4	145427367	145439843	+	Il17rc	protein_coding	23.2194	10.1107	0.435441	-1.19945	16.665	0.0119211	0.0380404
dHC enriched	ENSRNOG00000009848	8	54993859	55016299	+	Il18	protein_coding	19.8311	8.40728	0.423944	-1.23805	14.1192	0.0247293	0.0706638
dHC enriched	ENSRNOG00000001928	11	77463954	77593207	-	Il1rap	protein_coding	517.708	345.436	0.66724	-0.583722	431.572	6.25e-09	5.52e-08
dHC enriched	ENSRNOG00000016456	1	248132090	248147029	+	Il33	protein_coding	288.755	140.721	0.487339	-1.037	214.738	1.2e-13	1.56e-12
dHC enriched	ENSRNOG00000015441	1	196942364	196967220	+	Il4r	protein_coding	177.773	133.798	0.752633	-0.409981	155.786	0.0114853	0.0368628
dHC enriched	ENSRNOG00000020811	2	189205701	189254628	-	Il6r	protein_coding	236.293	104.15	0.440765	-1.18192	170.221	2.66e-12	3.14e-11
dHC enriched	ENSRNOG00000013963	2	44289393	44314944	+	Il6st	protein_coding	688.202	538.835	0.78296	-0.35299	613.518	0.00025397	0.00122122
dHC enriched	ENSRNOG00000018993	1	170578889	170585189	+	Ilk	protein_coding	745.147	629.469	0.844758	-0.24339	687.308	0.00467677	0.0168922
dHC enriched	ENSRNOG00000028650	6	137164535	137177622	+	Inf2	protein_coding	1102.55	656.707	0.595625	-0.747523	879.629	6.69e-15	9.36e-14
dHC enriched	ENSRNOG00000060237	13	35436532	35442222	-	Inhbb	protein_coding	97.7794	55.2975	0.565533	-0.822317	76.5384	0.00014292	0.0007173
dHC enriched	ENSRNOG00000016532	18	15995000	16009710	-	Ino80c	protein_coding	504.393	403.249	0.799474	-0.322877	453.821	0.00128972	0.00534793
dHC enriched	ENSRNOG00000018382	19	29597905	29968424	-	Inpp4b	protein_coding	81.5248	55.3973	0.679515	-0.557422	68.4611	0.0192144	0.0571779
dHC enriched	ENSRNOG00000020388	1	200037749	200116524	+	Inpp5f	protein_coding	598.138	481.35	0.804748	-0.313391	539.744	0.00129527	0.00536836
dHC enriched	ENSRNOG00000019361	14	83730862	83741969	-	Inpp5j	protein_coding	735.023	430.198	0.585285	-0.772789	582.61	8.64e-16	1.28e-14
dHC enriched	ENSRNOG00000019730	1	166899894	166911694	-	Inppl1	protein_coding	369.173	217.85	0.590102	-0.760965	293.511	1.75e-10	1.77e-09
dHC enriched	ENSRNOG00000009873	15	45858608	45947030	-	Ints6	protein_coding	267.803	215.369	0.804207	-0.314362	241.586	0.0140821	0.0439593
dHC enriched	ENSRNOG00000020361	8	117574161	117599848	+	Ip6k2	protein_coding	961.066	547.381	0.569556	-0.812089	754.223	1.05e-20	2.09e-19
dHC enriched	ENSRNOG00000019758	5	136728740	136748980	-	Ipo13	protein_coding	1589.32	1104.8	0.695141	-0.524622	1347.06	7.94e-16	1.18e-14
dHC enriched	ENSRNOG00000015631	17	15603929	15643437	-	Ippk	protein_coding	308.193	160.03	0.519254	-0.945486	234.112	5.89e-13	7.27e-12
dHC enriched	ENSRNOG00000025406	2	26167199	26438790	-	Iqgap2	protein_coding	874.698	154.061	0.17613	-2.50529	514.38	6.03e-117	1.65e-114
dHC enriched	ENSRNOG00000014083	4	153948055	154044493	-	Iqsec3	protein_coding	3408.98	2759.37	0.809443	-0.304998	3084.18	9.75e-08	7.57e-07
dHC enriched	ENSRNOG00000008144	10	39109522	39116531	+	Irf1	protein_coding	78.5646	52.9402	0.673842	-0.569517	65.7524	0.0133418	0.0419675
dHC enriched	ENSRNOG00000009824	16	48582026	48732932	-	Irf2	protein_coding	204.396	160.136	0.783459	-0.352071	182.266	0.0196917	0.0583727
dHC enriched	ENSRNOG00000007437	4	56805132	56820543	+	Irf5	protein_coding	102.171	63.9025	0.625445	-0.677045	83.0369	0.00112162	0.00471339
dHC enriched	ENSRNOG00000017414	1	214248837	214252456	-	Irf7	protein_coding	43.5002	23.0369	0.529581	-0.917076	33.2685	0.00617141	0.0215363
dHC enriched	ENSRNOG00000019478	15	34282936	34288138	+	Irf9	protein_coding	216.315	100.621	0.465161	-1.1042	158.468	2.18e-12	2.58e-11
dHC enriched	ENSRNOG00000031138	10	34213936	34221928	-	Irgm	protein_coding	39.0273	22.8763	0.586163	-0.770627	30.9518	0.0232544	0.0671775
dHC enriched	ENSRNOG00000023509	16	83824430	83848684	+	Irs2	protein_coding	813.556	717.759	0.882249	-0.180742	765.658	0.0304597	0.0841211
dHC enriched	ENSRNOG00000018343	17	5281727	5294384	+	Isca1	protein_coding	2222.69	1970.95	0.886741	-0.173416	2096.82	0.00471091	0.016994
dHC enriched	ENSRNOG00000021802	5	173624310	173626248	-	Isg15	protein_coding	27.9124	11.6829	0.418556	-1.25651	19.7976	0.00384355	0.0141895
dHC enriched	ENSRNOG00000015144	19	41968705	41990843	+	Ist1	protein_coding	919.886	765.315	0.831967	-0.265402	842.601	0.00055053	0.00247299
dHC enriched	ENSRNOG00000059043	3	150686638	150749827	+	Itch	protein_coding	539.104	462.999	0.85883	-0.219555	501.051	0.0190998	0.0569123
dHC enriched	ENSRNOG00000006723	8	67615635	67683973	+	Itga11	protein_coding	144.006	43.3248	0.300853	-1.73287	93.6657	4.07e-14	5.44e-13
dHC enriched	ENSRNOG00000004861	3	66193059	66263960	+	Itga4	protein_coding	39.266	18.3476	0.467265	-1.09769	28.8068	0.00223785	0.00876789
dHC enriched	ENSRNOG00000001518	3	58443101	58515124	+	Itga6	protein_coding	551.472	411.141	0.745535	-0.423653	481.306	1.43e-05	8.34e-05
dHC enriched	ENSRNOG00000007905	7	3355116	3384675	+	Itga7	protein_coding	367.87	84.8229	0.230579	-2.11667	226.346	3.03e-44	1.6e-42
dHC enriched	ENSRNOG00000019728	1	199495298	199623960	+	Itgam	protein_coding	80.4822	57.1477	0.710067	-0.493973	68.815	0.0345754	0.0937506
dHC enriched	ENSRNOG00000019728	1	199495298	199623960	+	Itgam	protein_coding	80.4822	57.1477	0.710067	-0.493973	68.815	0.0345754	0.0937506
dHC enriched	ENSRNOG00000010966	19	61677542	61725535	+	Itgb1	protein_coding	757.172	581.881	0.768493	-0.379896	669.527	5.19e-06	3.21e-05
dHC enriched	ENSRNOG00000059402	6	43348958	43363335	-	Itgb1bp1	protein_coding	241.765	187.527	0.775661	-0.366502	214.646	0.00750942	0.0255868
dHC enriched	ENSRNOG00000001224	20	11777783	11815647	-	Itgb2	protein_coding	74.5856	52.1609	0.699343	-0.515928	63.3733	0.0358333	0.0964526
dHC enriched	ENSRNOG00000005580	10	104523996	104561078	+	Itgb4	protein_coding	118.766	12.1724	0.102491	-3.28643	65.469	2.63e-28	7.64e-27
dHC enriched	ENSRNOG00000006569	6	147094097	147172813	-	Itgb8	protein_coding	333.599	215.318	0.645441	-0.631643	274.458	6.34e-07	4.46e-06
dHC enriched	ENSRNOG00000004516	15	110114148	110378969	+	Itgbl1	protein_coding	321.259	60.858	0.189436	-2.40022	191.059	1.42e-39	6.25e-38
dHC enriched	ENSRNOG00000049614	17	72036588	72046381	-	Itih5	protein_coding	168.891	79.4112	0.470194	-1.08867	124.151	4.37e-10	4.3e-09
dHC enriched	ENSRNOG00000016271	15	55254706	55277713	-	Itm2b	protein_coding	7151.86	4472.6	0.625375	-0.677206	5812.23	3.67e-37	1.44e-35
dHC enriched	ENSRNOG00000021233	3	123209608	123221269	+	Itpa	protein_coding	766.423	530.22	0.691811	-0.53155	648.322	2.42e-10	2.43e-09
dHC enriched	ENSRNOG00000005284	3	111545007	111553604	+	Itpka	protein_coding	1608	1015.63	0.631614	-0.662886	1311.82	3.59e-21	7.32e-20
dHC enriched	ENSRNOG00000009421	3	110669312	110690173	+	Ivd	protein_coding	833.293	546.193	0.655463	-0.609414	689.743	1.13e-12	1.36e-11
dHC enriched	ENSRNOG00000002618	13	68702820	68722472	+	Ivns1abp	protein_coding	1374.15	1174.53	0.854733	-0.226455	1274.34	0.00111464	0.00468749
dHC enriched	ENSRNOG00000018669	16	20109200	20120668	+	Jak3	protein_coding	85.0298	44.5309	0.52371	-0.933161	64.7804	0.00026673	0.00127507
dHC enriched	ENSRNOG00000042848	11	24266345	24285275	+	Jam2	protein_coding	453.287	363.174	0.801201	-0.319765	408.231	0.00194607	0.00775902
dHC enriched	ENSRNOG00000019442	1	100473643	100477351	+	Josd2	protein_coding	250.23	195.355	0.780702	-0.357157	222.793	0.00764161	0.0259576
dHC enriched	ENSRNOG00000006110	5	1417478	1511416	+	Jph1	protein_coding	391.172	148.5	0.379629	-1.39734	269.836	9.84e-29	2.91e-27
dHC enriched	ENSRNOG00000018784	19	54553419	54613477	+	Jph3	protein_coding	4783.09	3065.04	0.640809	-0.642034	3924.07	7.12e-29	2.12e-27
dHC enriched	ENSRNOG00000025589	15	33768595	33775109	-	Jph4	protein_coding	2964.15	1888.74	0.637196	-0.65019	2426.44	3.93e-25	9.77e-24
dHC enriched	ENSRNOG00000026293	5	114011189	114014277	-	Jun	protein_coding	936.983	684.651	0.730697	-0.452655	810.817	4.07e-07	2.93e-06
dHC enriched	ENSRNOG00000016023	1	243276403	243398536	+	Kank1	protein_coding	376.648	235.559	0.625409	-0.677129	306.103	6.17e-08	4.88e-07
dHC enriched	ENSRNOG00000010643	8	22791995	22821397	-	Kank2	protein_coding	193.52	86.0955	0.444893	-1.16847	139.808	2.05e-12	2.43e-11
dHC enriched	ENSRNOG00000007779	5	117376423	117440254	-	Kank4	protein_coding	183.995	19.8591	0.107933	-3.21179	101.927	1.58e-37	6.4e-36
dHC enriched	ENSRNOG00000060185	7	140196953	140213050	-	Kansl2	protein_coding	124.111	92.9795	0.749167	-0.416641	108.545	0.0233751	0.0674323
dHC enriched	ENSRNOG00000060185	7	140196953	140213050	-	Kansl2	protein_coding	124.111	92.9795	0.749167	-0.416641	108.545	0.0233751	0.0674323
dHC enriched	ENSRNOG00000025174	16	73943455	74023005	-	Kat6a	protein_coding	765.92	603.595	0.788065	-0.343614	684.758	4.13e-05	0.00022628
dHC enriched	ENSRNOG00000012333	16	79696891	79700992	-	Kbtbd11	protein_coding	1132.52	487.894	0.430803	-1.2149	810.208	7.65e-50	4.79e-48
dHC enriched	ENSRNOG00000019750	4	159190804	159192526	-	Kcna1	protein_coding	550.553	277.878	0.504724	-0.986433	414.215	2.67e-16	4.08e-15
dHC enriched	ENSRNOG00000004918	3	98297554	98300680	+	Kcna4	protein_coding	255.369	200.289	0.784314	-0.350497	227.829	0.00756154	0.0257389
dHC enriched	ENSRNOG00000056697	2	155718359	156009526	+	Kcnab1	protein_coding	1740.44	1153.4	0.662706	-0.593559	1446.92	5.12e-18	8.69e-17
dHC enriched	ENSRNOG00000011550	5	169572517	169658875	-	Kcnab2	protein_coding	5014.02	1852.67	0.369497	-1.43637	3433.35	1.66e-112	4.14e-110
dHC enriched	ENSRNOG00000019959	1	100593680	100607874	+	Kcnc3	protein_coding	2209.35	1086.42	0.491736	-1.02404	1647.88	4.62e-46	2.56e-44
dHC enriched	ENSRNOG00000039544	X	15506724	15520712	-	Kcnd1	protein_coding	133.609	91.2311	0.682824	-0.550415	112.42	0.0022653	0.00885952
dHC enriched	ENSRNOG00000053640	18	76809144	76878981	-	Kcng2	protein_coding	344.969	61.4512	0.178135	-2.48896	203.21	4.71e-51	3.01e-49
dHC enriched	ENSRNOG00000015746	19	52270927	52282877	-	Kcng4	protein_coding	235.594	44.0767	0.187088	-2.41821	139.835	1.97e-36	7.56e-35
dHC enriched	ENSRNOG00000058626	9	3127618	3697736	-	Kcnh8	protein_coding	31.6396	1.93638	0.0612011	-4.0303	16.788	4e-11	4.3e-10
dHC enriched	ENSRNOG00000050450	1	265549593	265573409	-	Kcnip2	protein_coding	347.961	82.8297	0.238043	-2.07071	215.396	1.48e-44	7.9e-43
dHC enriched	ENSRNOG00000007705	13	90723092	90752581	+	Kcnj10	protein_coding	657.972	477.503	0.72572	-0.462516	567.737	2.64e-07	1.95e-06
dHC enriched	ENSRNOG00000021056	1	101805531	101809544	-	Kcnj14	protein_coding	106.31	77.1616	0.725818	-0.462321	91.7357	0.0176042	0.0531402
dHC enriched	ENSRNOG00000005369	3	41019898	41181070	+	Kcnj3	protein_coding	786.108	599.335	0.762407	-0.391367	692.721	2.97e-06	1.9e-05
dHC enriched	ENSRNOG00000001658	11	35024196	35099383	-	Kcnj6	protein_coding	721.622	306.34	0.424516	-1.23611	513.981	4.99e-32	1.71e-30
dHC enriched	ENSRNOG00000047005	15	4554603	4597000	+	Kcnk5	protein_coding	23.7428	2.94863	0.124191	-3.00937	13.3457	9.17e-07	6.29e-06
dHC enriched	ENSRNOG00000011624	3	176589906	176644951	-	Kcnq2	protein_coding	3757.32	2502.2	0.665952	-0.586509	3129.76	7.91e-27	2.16e-25
dHC enriched	ENSRNOG00000005206	7	106717229	107009330	-	Kcnq3	protein_coding	855.414	622.238	0.727412	-0.459156	738.826	1.43e-06	9.58e-06
dHC enriched	ENSRNOG00000011369	7	73588163	73590385	+	Kcns2	protein_coding	219.198	142.531	0.650237	-0.620962	180.864	2.34e-05	0.00013257
dHC enriched	ENSRNOG00000021855	4	56760220	56786754	-	Kcp	protein_coding	64.1452	16.1136	0.251206	-1.99306	40.1294	2.25e-08	1.87e-07
dHC enriched	ENSRNOG00000020010	1	198360627	198378934	+	Kctd13	protein_coding	1128.28	991.124	0.878438	-0.186988	1059.7	0.00781256	0.0264515
dHC enriched	ENSRNOG00000021137	1	90506697	90520344	-	Kctd15	protein_coding	286.913	162.889	0.567729	-0.816725	224.901	1.37e-09	1.29e-08
dHC enriched	ENSRNOG00000000231	7	119647375	119658148	+	Kctd17	protein_coding	1291.15	954.438	0.739213	-0.435939	1122.8	9.12e-09	7.9e-08
dHC enriched	ENSRNOG00000050996	15	58016238	58019442	+	Kctd4	protein_coding	1080.15	206.907	0.191555	-2.38417	643.526	7.71e-124	2.46e-121
dHC enriched	ENSRNOG00000007817	15	18484510	18493366	-	Kctd6	protein_coding	244.284	123.823	0.506881	-0.980281	184.053	1.09e-10	1.12e-09
dHC enriched	ENSRNOG00000013577	7	120749752	120760160	+	Kdelr3	protein_coding	33.2116	12.3975	0.373289	-1.42164	22.8046	0.00072693	0.00317583
dHC enriched	ENSRNOG00000019956	5	136967650	137014430	-	Kdm4a	protein_coding	704.813	624.319	0.885794	-0.174956	664.566	0.0347839	0.0941288
dHC enriched	ENSRNOG00000049221	9	10653216	10734073	-	Kdm4b	protein_coding	936.278	839.236	0.896354	-0.15786	887.757	0.0346435	0.0938361
dHC enriched	ENSRNOG00000006644	5	90818736	91065388	+	Kdm4c	protein_coding	241.98	182.308	0.753401	-0.40851	212.144	0.00230029	0.0089798
dHC enriched	ENSRNOG00000060496	Y	505853	589511	+	Kdm5d	protein_coding	472.033	394.466	0.835675	-0.258986	433.249	0.0108771	0.0351535
dHC enriched	ENSRNOG00000037613	10	56001799	56008885	-	Kdm6b	protein_coding	320.977	204.65	0.637583	-0.649315	262.813	1.95e-07	1.47e-06
dHC enriched	ENSRNOG00000052445	4	66922013	66955732	-	Kdm7a	protein_coding	203.76	118.542	0.581774	-0.781469	161.151	8.13e-07	5.63e-06
dHC enriched	ENSRNOG00000001455	17	18151982	18335019	+	Kif13a	protein_coding	404.619	264.209	0.652982	-0.614884	334.414	4.59e-07	3.29e-06
dHC enriched	ENSRNOG00000013089	15	48030973	48189951	+	Kif13b	protein_coding	370.536	294.019	0.793496	-0.333705	332.277	0.00498894	0.0178919
dHC enriched	ENSRNOG00000014970	5	156628432	156666284	+	Kif17	protein_coding	233.16	168.594	0.723083	-0.467766	200.877	0.00102654	0.00435749
dHC enriched	ENSRNOG00000003105	10	103308392	103334466	+	Kif19	protein_coding	37.4339	17.4431	0.465969	-1.10169	27.4385	0.00453327	0.0164221
dHC enriched	ENSRNOG00000000395	20	32191734	32211453	-	Kif1bp	protein_coding	1760.81	1353.02	0.768405	-0.380061	1556.92	2.66e-09	2.45e-08
dHC enriched	ENSRNOG00000031364	10	57322331	57351353	+	Kif1c	protein_coding	1650.24	834.388	0.505616	-0.983885	1242.31	7.96e-30	2.45e-28
dHC enriched	ENSRNOG00000028624	13	96775357	97173469	-	Kif26b	protein_coding	210.041	81.1459	0.386334	-1.37208	145.593	2.83e-16	4.3e-15
dHC enriched	ENSRNOG00000010361	3	148773259	148813293	+	Kif3b	protein_coding	1055.01	945.395	0.896101	-0.158266	1000.2	0.0351363	0.0949183
dHC enriched	ENSRNOG00000038035	X	70461718	70561189	+	Kif4a	protein_coding	23.9711	6.78612	0.283095	-1.82064	15.3786	0.00055284	0.00248144
dHC enriched	ENSRNOG00000017466	17	54181419	54212096	+	Kif5b	protein_coding	1543.08	1208.96	0.783469	-0.352052	1376.02	7.07e-06	4.29e-05
dHC enriched	ENSRNOG00000026857	1	141434625	141451075	-	Kif7	protein_coding	62.2927	40.108	0.643863	-0.635173	51.2003	0.0164919	0.0502677
dHC enriched	ENSRNOG00000014087	19	10320604	10339178	+	Kifc3	protein_coding	646.454	549.365	0.849812	-0.234785	597.91	0.00944227	0.0310921
dHC enriched	ENSRNOG00000009772	8	36125999	36254753	+	Kirrel3	protein_coding	679.367	498.73	0.73411	-0.445931	589.049	2.37e-05	0.00013417
dHC enriched	ENSRNOG00000002227	14	35072108	35149610	-	Kit	protein_coding	1509.64	415.752	0.275399	-1.86041	962.695	2e-112	4.91e-110
dHC enriched	ENSRNOG00000005386	7	42269784	42351054	+	Kitlg	protein_coding	277.179	201.476	0.72688	-0.460212	239.327	0.00023663	0.00114229
dHC enriched	ENSRNOG00000025141	3	141068023	141173858	+	Kiz	protein_coding	105.611	61.2751	0.580194	-0.785393	83.4432	0.00019914	0.00097614
dHC enriched	ENSRNOG00000014205	16	19223087	19225037	-	Klf2	protein_coding	45.1136	21.308	0.472319	-1.08217	33.2108	0.00111061	0.00467283
dHC enriched	ENSRNOG00000002163	14	45142769	45165207	-	Klf3	protein_coding	463.286	243.884	0.526422	-0.925708	353.585	9.38e-18	1.57e-16
dHC enriched	ENSRNOG00000014215	1	240908483	240933198	+	Klf9	protein_coding	883.802	730.012	0.82599	-0.275804	806.907	0.00290537	0.0110632
dHC enriched	ENSRNOG00000014029	X	121578940	121731543	-	Klhl13	protein_coding	489.105	373.189	0.763003	-0.390238	431.147	0.0002105	0.00102711
dHC enriched	ENSRNOG00000015418	18	12526627	12640381	-	Klhl14	protein_coding	90.5472	2.95255	0.0326079	-4.93864	46.7499	2.6e-28	7.57e-27
dHC enriched	ENSRNOG00000029441	16	26739389	26852179	+	Klhl2	protein_coding	3734.47	2206.79	0.590926	-0.758951	2970.63	8.4e-42	4.06e-40
dHC enriched	ENSRNOG00000003334	5	169181418	169190073	+	Klhl21	protein_coding	213.759	129.757	0.607025	-0.720172	171.758	1.59e-06	1.06e-05
dHC enriched	ENSRNOG00000020088	16	20704807	20729882	+	Klhl26	protein_coding	826.796	495.011	0.59871	-0.740072	660.903	1.98e-16	3.06e-15
dHC enriched	ENSRNOG00000016422	19	52515022	52536476	+	Klhl36	protein_coding	97.0452	64.2765	0.662335	-0.594367	80.6609	0.00503136	0.0180253
dHC enriched	ENSRNOG00000008421	14	44805200	44845218	-	Klhl5	protein_coding	939.412	585.065	0.622799	-0.683161	762.239	1.21e-15	1.77e-14
dHC enriched	ENSRNOG00000006335	5	107323258	107327442	+	Klhl9	protein_coding	912.016	803.867	0.881417	-0.182103	857.941	0.0302937	0.0837601
dHC enriched	ENSRNOG00000018742	1	99712108	99716648	+	Klk11	protein_coding	24.7589	0.638285	0.02578	-5.2776	12.6986	2.96e-10	2.96e-09
dHC enriched	ENSRNOG00000031927	1	99762253	99769488	+	Klk6	protein_coding	198.303	99.7382	0.502957	-0.991493	149.021	0.0101917	0.0332569
dHC enriched	ENSRNOG00000018580	1	99734993	99742009	+	Klk8	protein_coding	160.028	2.25552	0.0140946	-6.14872	81.1415	8.19e-47	4.71e-45
dHC enriched	ENSRNOG00000027240	1	212230259	212277694	+	Kndc1	protein_coding	1657.3	1053.63	0.635754	-0.65346	1355.47	6.65e-19	1.2e-17
dHC enriched	ENSRNOG00000010768	2	165684345	165739874	-	Kpna4	protein_coding	746.239	560.73	0.751408	-0.412332	653.485	3.48e-06	2.2e-05
dHC enriched	ENSRNOG00000007124	4	99133842	99146827	+	Krcc1	protein_coding	109.452	71.5756	0.653943	-0.612764	90.514	0.0020915	0.00826708
dHC enriched	ENSRNOG00000009563	7	143412858	143420027	-	Krt2	protein_coding	130.62	60.676	0.464524	-1.10618	95.6478	2.24e-06	1.46e-05
dHC enriched	ENSRNOG00000011628	10	87256434	87261717	-	Krt27	protein_coding	33.2993	4.513	0.135528	-2.88333	18.9062	4.76e-08	3.82e-07
dHC enriched	ENSRNOG00000012818	10	66347358	66482150	-	Ksr1	protein_coding	725.81	223.596	0.308065	-1.6987	474.703	4.97e-63	4.3e-61
dHC enriched	ENSRNOG00000008210	8	110982777	111022385	+	Ky	protein_coding	19.4977	2.62752	0.134761	-2.89153	11.0626	9.27e-06	5.55e-05
dHC enriched	ENSRNOG00000017383	1	154142836	154170409	-	l7Rn6	protein_coding	292.684	227.254	0.776446	-0.365043	259.969	0.00382016	0.0141093
dHC enriched	ENSRNOG00000018081	8	72750171	72766389	-	Lactb	protein_coding	78.4556	50.8393	0.648001	-0.625931	64.6474	0.00904609	0.030014
dHC enriched	ENSRNOG00000011134	1	18491384	19143269	+	Lama2	protein_coding	126.773	69.3905	0.547362	-0.869433	98.0816	1.05e-05	6.22e-05
dHC enriched	ENSRNOG00000047768	8	117268337	117280517	+	Lamb2	protein_coding	484.677	270.563	0.558233	-0.841059	377.62	6.04e-14	8.01e-13
dHC enriched	ENSRNOG00000019629	16	81689335	81714419	-	Lamp1	protein_coding	3668.81	2934.68	0.799901	-0.322107	3301.75	1.2e-06	8.11e-06
dHC enriched	ENSRNOG00000000164	X	124722628	124766044	-	Lamp2	protein_coding	739.183	581.249	0.78634	-0.346776	660.216	0.00020847	0.0010181
dHC enriched	ENSRNOG00000003289	14	70102814	70121797	-	Lap3	protein_coding	528.457	337.887	0.639385	-0.645244	433.172	6.75e-08	5.33e-07
dHC enriched	ENSRNOG00000006865	6	34028936	34059961	+	Laptm4a	protein_coding	2173.22	1622.81	0.74673	-0.421342	1898.01	5.67e-10	5.53e-09
dHC enriched	ENSRNOG00000006766	7	72924799	72968101	+	Laptm4b	protein_coding	511.708	295.311	0.577108	-0.793088	403.51	1.33e-12	1.6e-11
dHC enriched	ENSRNOG00000011054	5	149047681	149069719	+	Laptm5	protein_coding	244.005	194.956	0.798982	-0.323765	219.48	0.0210048	0.0615517
dHC enriched	ENSRNOG00000012438	8	65611570	65632706	+	Larp6	protein_coding	410.019	304.56	0.742794	-0.428965	357.289	0.00029824	0.00141548
dHC enriched	ENSRNOG00000056343	15	37943609	37983882	-	Lats2	protein_coding	754.217	166.576	0.220859	-2.1788	460.396	2.85e-77	3.56e-75
dHC enriched	ENSRNOG00000019701	1	225085282	225087266	+	Lbhd1	protein_coding	82.8405	56.5623	0.682786	-0.550494	69.7014	0.0152006	0.0469278
dHC enriched	ENSRNOG00000019573	19	37913336	37916813	-	Lcat	protein_coding	110.496	60.4115	0.546731	-0.871097	85.4537	0.0002213	0.00107492
dHC enriched	ENSRNOG00000010319	15	57221292	57277811	+	Lcp1	protein_coding	228.139	152.843	0.669955	-0.577864	190.491	0.00014142	0.00071042
dHC enriched	ENSRNOG00000005620	10	18996523	19043286	+	Lcp2	protein_coding	54.3681	32.0531	0.589556	-0.7623	43.2106	0.00764319	0.0259576
dHC enriched	ENSRNOG00000021475	6	33407248	33491725	+	Ldah	protein_coding	489.47	385.972	0.788551	-0.342723	437.721	0.00069665	0.00305907
dHC enriched	ENSRNOG00000059166	16	10878334	10941501	-	Ldb3	protein_coding	64.182	19.4637	0.303257	-1.72139	41.8228	4.24e-08	3.42e-07
dHC enriched	ENSRNOG00000000151	5	152966591	152987211	-	Ldlrap1	protein_coding	51.3401	30.8744	0.60137	-0.733675	41.1072	0.0185201	0.0555247
dHC enriched	ENSRNOG00000050849	5	120498910	120511009	+	Leprot	protein_coding	314.105	193.981	0.617567	-0.695333	254.043	3.73e-08	3.02e-07
dHC enriched	ENSRNOG00000012601	16	61758917	61771569	+	Leprotl1	protein_coding	867.99	747.228	0.860871	-0.216131	807.609	0.00625903	0.0217705
dHC enriched	ENSRNOG00000001250	12	16118634	16126953	-	Lfng	protein_coding	183.962	128.811	0.700205	-0.51415	156.387	0.00146703	0.00603081
dHC enriched	ENSRNOG00000003217	10	107415326	107424710	-	Lgals3bp	protein_coding	150.336	91.3369	0.607551	-0.718923	120.837	4.96e-05	0.00026822
dHC enriched	ENSRNOG00000018046	17	66487457	66511870	-	Lgals8	protein_coding	317.857	263.132	0.827833	-0.272588	290.495	0.0183253	0.0550175
dHC enriched	ENSRNOG00000014758	1	256955652	256999253	+	Lgi1	protein_coding	3450.31	2060.6	0.59722	-0.743664	2755.45	2.86e-38	1.19e-36
dHC enriched	ENSRNOG00000021087	1	89491654	89502974	+	Lgi4	protein_coding	1119.26	772.787	0.690445	-0.534402	946.023	9.28e-11	9.61e-10
dHC enriched	ENSRNOG00000011032	2	23770721	23852021	+	Lhfpl2	protein_coding	288.876	208.696	0.722444	-0.469043	248.786	0.00022773	0.00110275
dHC enriched	ENSRNOG00000010551	3	22640545	22658446	+	Lhx2	protein_coding	581.19	340.272	0.585475	-0.77232	460.731	8.19e-16	1.21e-14
dHC enriched	ENSRNOG00000010357	13	55861015	55878094	-	Lhx9	protein_coding	61.7972	5.98537	0.096855	-3.36803	33.8913	1.07e-16	1.67e-15
dHC enriched	ENSRNOG00000021815	10	70134729	70158055	+	Lig3	protein_coding	452.304	322.898	0.713896	-0.486214	387.601	2.98e-06	1.9e-05
dHC enriched	ENSRNOG00000059801	7	141428063	141528397	-	Lima1	protein_coding	166.114	100.5	0.605007	-0.724976	133.307	1.36e-05	7.93e-05
dHC enriched	ENSRNOG00000002318	14	42762587	43072843	-	Limch1	protein_coding	1465.69	892.615	0.609006	-0.715472	1179.15	1.27e-21	2.67e-20
dHC enriched	ENSRNOG00000025448	10	94350817	94352880	-	Limd2	protein_coding	1032.25	615.612	0.596379	-0.745699	823.932	2.25e-17	3.65e-16
dHC enriched	ENSRNOG00000037765	20	27954433	28002082	+	Lims1	protein_coding	111.498	81.1655	0.727955	-0.458079	96.3317	0.0225328	0.0653234
dHC enriched	ENSRNOG00000016021	18	24708115	24746159	+	Lims2	protein_coding	166.072	114.111	0.68712	-0.541365	140.092	0.00215616	0.00849038
dHC enriched	ENSRNOG00000045698	3	101010899	101018433	+	Lin7c	protein_coding	320.117	199.925	0.624538	-0.679138	260.021	2.38e-07	1.77e-06
dHC enriched	ENSRNOG00000032569	7	11737293	11746703	+	Lingo3	protein_coding	279.9	91.6599	0.327474	-1.61055	185.78	5.61e-22	1.2e-20
dHC enriched	ENSRNOG00000002520	10	4719713	4763510	+	Litaf	protein_coding	262.881	135.572	0.515717	-0.95535	199.226	3.6e-11	3.89e-10
dHC enriched	ENSRNOG00000012988	1	59156251	59214452	+	Lix1	protein_coding	1323.56	525.813	0.397273	-1.3318	924.684	3.5e-54	2.41e-52
dHC enriched	ENSRNOG00000021213	2	198726118	198751985	+	Lix1l	protein_coding	433.376	249.736	0.576258	-0.795214	341.556	1.95e-12	2.32e-11
dHC enriched	ENSRNOG00000003948	10	46940965	46954674	+	Llgl1	protein_coding	855.143	532.922	0.623196	-0.682242	694.033	2e-14	2.72e-13
dHC enriched	ENSRNOG00000016161	17	9797907	9816139	+	Lman2	protein_coding	632.857	460.128	0.727065	-0.459843	546.493	6.4e-07	4.49e-06
dHC enriched	ENSRNOG00000015699	9	42999229	43022999	-	Lman2l	protein_coding	344.457	282.038	0.818791	-0.288433	313.248	0.0149095	0.0461977
dHC enriched	ENSRNOG00000005690	4	144192989	144252551	+	Lmcd1	protein_coding	98.2948	62.0152	0.63091	-0.664494	80.155	0.00553709	0.0195842
dHC enriched	ENSRNOG00000001781	11	70897052	70961358	-	Lmln	protein_coding	173.011	99.1098	0.572852	-0.803767	136.061	1.89e-06	1.25e-05
dHC enriched	ENSRNOG00000014629	1	173728184	173764250	-	Lmo1	protein_coding	256.189	82.6496	0.322612	-1.63213	169.419	1.2e-23	2.76e-22
dHC enriched	ENSRNOG00000009401	3	93909156	93931871	+	Lmo2	protein_coding	211.353	62.1207	0.293919	-1.76651	136.737	4.17e-21	8.46e-20
dHC enriched	ENSRNOG00000047450	4	172942020	173005634	+	Lmo3	protein_coding	1052.85	907.057	0.861528	-0.21503	979.952	0.023978	0.06884
dHC enriched	ENSRNOG00000060775	15	86243148	86457739	+	Lmo7	protein_coding	1362.64	903.329	0.662927	-0.593077	1132.98	2.67e-12	3.14e-11
dHC enriched	ENSRNOG00000051548	13	52147555	52190228	+	Lmod1	protein_coding	83.7061	41.9151	0.500741	-0.997863	62.8106	6.17e-05	0.00032998
dHC enriched	ENSRNOG00000039649	11	45888221	45904848	+	Lnp1	protein_coding	42.5931	3.35196	0.0786973	-3.66754	22.9725	7.96e-13	9.71e-12
dHC enriched	ENSRNOG00000009958	8	55038597	55050194	-	LOC100151767	protein_coding	229.229	179.026	0.780992	-0.356621	204.128	0.00954843	0.0313901
dHC enriched	ENSRNOG00000012204	5	144779681	144872271	+	LOC100294508	protein_coding	1103.81	905.737	0.820556	-0.285326	1004.77	0.00033397	0.00156992
dHC enriched	ENSRNOG00000027542	1	206324765	206417143	-	LOC100302465	protein_coding	49.6185	28.0726	0.56577	-0.821713	38.8456	0.00612204	0.0213936
dHC enriched	ENSRNOG00000011104	5	169506138	169512871	+	LOC100360057	protein_coding	370.759	275.436	0.742897	-0.428766	323.098	0.00036918	0.00172178
dHC enriched	ENSRNOG00000011104	5	169506138	169512871	+	LOC100360057	protein_coding	370.759	275.436	0.742897	-0.428766	323.098	0.00036918	0.00172178
dHC enriched	ENSRNOG00000051615	5	152195361	152198813	-	LOC100360316	protein_coding	506.377	369.508	0.72971	-0.454606	437.942	1.28e-05	7.51e-05
dHC enriched	ENSRNOG00000051615	5	152195361	152198813	-	LOC100360316	protein_coding	506.377	369.508	0.72971	-0.454606	437.942	1.28e-05	7.51e-05
dHC enriched	ENSRNOG00000013874	8	66862143	66863476	-	LOC100360522	protein_coding	2426.62	2127.8	0.876859	-0.189584	2277.21	0.0143825	0.0447422
dHC enriched	ENSRNOG00000013874	8	66862143	66863476	-	LOC100360522	protein_coding	2426.62	2127.8	0.876859	-0.189584	2277.21	0.0143825	0.0447422
dHC enriched	ENSRNOG00000013874	8	66862143	66863476	-	LOC100360522	protein_coding	2426.62	2127.8	0.876859	-0.189584	2277.21	0.0143825	0.0447422
dHC enriched	ENSRNOG00000033891	20	33174892	33182294	+	LOC100361475	protein_coding	76.9316	53.2182	0.691759	-0.531658	65.0749	0.0221726	0.0644749
dHC enriched	ENSRNOG00000055277	5	78380816	78384047	-	LOC100362333	protein_coding	393.274	299.591	0.761786	-0.392542	346.433	0.0005095	0.0023104
dHC enriched	ENSRNOG00000055277	5	78380816	78384047	-	LOC100362333	protein_coding	393.274	299.591	0.761786	-0.392542	346.433	0.0005095	0.0023104
dHC enriched	ENSRNOG00000048986	6	129320389	129320640	+	LOC100909954	protein_coding	202.816	76.7073	0.378212	-1.40273	139.761	6.28e-16	9.38e-15
dHC enriched	ENSRNOG00000052664	1	255479261	255532143	+	LOC100910717	protein_coding	2969.99	2139	0.720204	-0.473522	2554.5	4.92e-14	6.54e-13
dHC enriched	ENSRNOG00000027295	8	72476425	72629265	-	LOC100911293	protein_coding	172.523	132.702	0.769182	-0.378603	152.613	0.0141509	0.0441365
dHC enriched	ENSRNOG00000027295	8	72476425	72629265	-	LOC100911293	protein_coding	172.523	132.702	0.769182	-0.378603	152.613	0.0141509	0.0441365
dHC enriched	ENSRNOG00000027295	8	72476425	72629265	-	LOC100911293	protein_coding	172.523	132.702	0.769182	-0.378603	152.613	0.0141509	0.0441365
dHC enriched	ENSRNOG00000050800	14	88543630	88574203	+	LOC100911576	protein_coding	140.291	108.494	0.773351	-0.370805	124.392	0.0369149	0.0988996
dHC enriched	ENSRNOG00000050223	1	220335254	220342297	+	LOC100911794	protein_coding	239.538	140.075	0.584774	-0.774049	189.806	1.48e-07	1.13e-06
dHC enriched	ENSRNOG00000018018	1	262892545	262916361	+	LOC100911951	protein_coding	226.973	55.4855	0.244458	-2.03234	141.229	8.3e-29	2.47e-27
dHC enriched	ENSRNOG00000018018	1	262892545	262916361	+	LOC100911951	protein_coding	226.973	55.4855	0.244458	-2.03234	141.229	8.3e-29	2.47e-27
dHC enriched	ENSRNOG00000030807	1	186640425	186641393	-	LOC100912427	processed_pseudogene	64.6801	32.1627	0.497258	-1.00793	48.4214	0.00031603	0.00149253
dHC enriched	ENSRNOG00000056964	11	28056131	28057737	+	LOC102549158	processed_pseudogene	34.5164	20.192	0.584999	-0.773494	27.3542	0.0346226	0.0937956
dHC enriched	ENSRNOG00000013484	9	27368272	27452902	-	LOC102550391	protein_coding	791.06	331.677	0.419282	-1.25401	561.369	4.93e-30	1.54e-28
dHC enriched	ENSRNOG00000046309	6	124874151	124876710	-	LOC102553138	protein_coding	108.675	76.6348	0.705174	-0.503948	92.6549	0.0130417	0.0410912
dHC enriched	ENSRNOG00000026569	1	62133816	62174310	+	LOC102555377	protein_coding	97.7849	71.7597	0.733853	-0.446438	84.7723	0.0299969	0.083043
dHC enriched	ENSRNOG00000028993	X	1345684	1346181	-	LOC102555453	protein_coding	288.219	233.621	0.810565	-0.303	260.92	0.0313693	0.086287
dHC enriched	ENSRNOG00000057696	1	197659187	197681006	+	LOC103690016	protein_coding	33.0082	18.2772	0.553716	-0.852782	25.6427	0.0214971	0.062776
dHC enriched	ENSRNOG00000047098	1	168945449	168965566	+	LOC103694857	protein_coding	151.393	116.698	0.770827	-0.375521	134.045	0.0222552	0.0646712
dHC enriched	ENSRNOG00000047098	1	168945449	168965566	+	LOC103694857	protein_coding	151.393	116.698	0.770827	-0.375521	134.045	0.0222552	0.0646712
dHC enriched	ENSRNOG00000047098	1	168945449	168965566	+	LOC103694857	protein_coding	151.393	116.698	0.770827	-0.375521	134.045	0.0222552	0.0646712
dHC enriched	ENSRNOG00000019711	18	53727209	53745200	+	LOC103694869	protein_coding	157.057	83.9379	0.534441	-0.903897	120.498	3.19e-07	2.33e-06
dHC enriched	ENSRNOG00000019711	18	53727209	53745200	+	LOC103694869	protein_coding	157.057	83.9379	0.534441	-0.903897	120.498	3.19e-07	2.33e-06
dHC enriched	ENSRNOG00000005389	10	37535871	37554664	-	LOC103694903	protein_coding	1520.77	1344.29	0.88395	-0.177963	1432.53	0.00667605	0.0230209
dHC enriched	ENSRNOG00000005389	10	37535871	37554664	-	LOC103694903	protein_coding	1520.77	1344.29	0.88395	-0.177963	1432.53	0.00667605	0.0230209
dHC enriched	ENSRNOG00000028677	18	68957553	68983619	-	LOC361346	protein_coding	143.243	109.048	0.761279	-0.393503	126.146	0.0205228	0.0604335
dHC enriched	ENSRNOG00000016063	1	188448478	188552272	+	LOC361635	protein_coding	657.594	542.398	0.824822	-0.277846	599.996	0.00121301	0.00505297
dHC enriched	ENSRNOG00000002191	14	46050750	46054022	-	LOC498368	protein_coding	69.8365	45.8407	0.6564	-0.607352	57.8386	0.0129478	0.0408336
dHC enriched	ENSRNOG00000033402	9	27475273	27511176	-	LOC501110	protein_coding	120.224	70.3519	0.585176	-0.773058	95.2877	0.00010454	0.00053595
dHC enriched	ENSRNOG00000027623	14	79261092	79325896	+	LOC680039	protein_coding	1746.89	1515.68	0.867644	-0.204826	1631.29	0.00242002	0.00938967
dHC enriched	ENSRNOG00000023828	7	117180812	117187367	-	LOC680875	protein_coding	45.6188	4.56978	0.100173	-3.31943	25.0943	1.42e-12	1.7e-11
dHC enriched	ENSRNOG00000054978	17	43639749	43640387	-	LOC684681	protein_coding	355.187	137.634	0.387497	-1.36774	246.41	1.35e-19	2.54e-18
dHC enriched	ENSRNOG00000029191	2	248219428	248239899	+	LOC685067	protein_coding	15.7964	4.62068	0.292516	-1.77341	10.2085	0.00409445	0.0150063
dHC enriched	ENSRNOG00000048967	9	23420654	23424832	+	LOC688459	protein_coding	27.9331	2.74305	0.0982007	-3.34812	15.3381	0.003043	0.0115285
dHC enriched	ENSRNOG00000043197	7	123482255	123490023	+	LOC688613	protein_coding	327.108	257.151	0.786135	-0.34715	292.129	0.00321927	0.0121163
dHC enriched	ENSRNOG00000042867	16	81463129	81487566	+	LOC688801	lincRNA	24.8271	10.2262	0.411897	-1.27964	17.5266	0.00987163	0.0323229
dHC enriched	ENSRNOG00000033100	3	143828611	143829156	+	LOC689130	processed_pseudogene	471.076	294.232	0.624595	-0.679007	382.654	1.96e-07	1.47e-06
dHC enriched	ENSRNOG00000037960	13	98724295	98772968	-	LOC689499	protein_coding	418.051	339.624	0.812399	-0.29974	378.838	0.00498871	0.0178919
dHC enriched	ENSRNOG00000046109	4	62780596	62790422	+	LOC689574	protein_coding	149.257	108.76	0.728679	-0.456644	129.009	0.00740986	0.0252926
dHC enriched	ENSRNOG00000013092	X	122938009	122973321	+	Lonrf3	protein_coding	260.337	66.5496	0.255628	-1.96788	163.443	3.04e-32	1.04e-30
dHC enriched	ENSRNOG00000008680	8	63067300	63092009	-	Loxl1	protein_coding	140.472	49.7389	0.354085	-1.49783	95.1053	3.62e-13	4.51e-12
dHC enriched	ENSRNOG00000061373	4	113866804	113883477	+	Loxl3	protein_coding	56.1597	24.2547	0.431888	-1.21127	40.2072	6.99e-05	0.00037017
dHC enriched	ENSRNOG00000002428	X	78042859	78056347	+	Lpar4	protein_coding	19.8993	7.1973	0.361687	-1.46719	13.5483	0.00468807	0.0169188
dHC enriched	ENSRNOG00000012181	16	22537056	22561496	-	Lpl	protein_coding	994.946	174.944	0.175833	-2.50773	584.945	5.78e-113	1.48e-110
dHC enriched	ENSRNOG00000007575	5	67852180	68139199	-	Lppr1	protein_coding	207.721	92.1337	0.443546	-1.17284	149.927	1.13e-12	1.37e-11
dHC enriched	ENSRNOG00000012164	8	22947152	22959554	+	Lppr2	protein_coding	3939.18	2084.34	0.529131	-0.918303	3011.76	1.83e-49	1.13e-47
dHC enriched	ENSRNOG00000016872	2	220298245	220341866	+	Lppr4	protein_coding	4661	2055.4	0.440977	-1.18122	3358.2	1.42e-82	2.02e-80
dHC enriched	ENSRNOG00000001774	11	71012061	71108184	-	Lrch3	protein_coding	252.393	182.122	0.721579	-0.47077	217.257	0.00041372	0.00190778
dHC enriched	ENSRNOG00000001402	12	22127393	22138382	-	Lrch4	protein_coding	146.984	106.754	0.726293	-0.461377	126.869	0.00756967	0.0257512
dHC enriched	ENSRNOG00000012952	4	126617244	126644895	-	Lrig1	protein_coding	397.609	175.751	0.442018	-1.17782	286.68	1.6e-22	3.52e-21
dHC enriched	ENSRNOG00000011592	15	33108671	33114829	+	Lrp10	protein_coding	360.345	215.992	0.599402	-0.738403	288.168	5e-10	4.9e-09
dHC enriched	ENSRNOG00000004152	7	78859784	78930832	-	Lrp12	protein_coding	802.594	551.634	0.687314	-0.54096	677.114	1.77e-10	1.8e-09
dHC enriched	ENSRNOG00000015285	3	80362858	80416679	+	Lrp4	protein_coding	865.44	649.565	0.75056	-0.413961	757.502	6.57e-07	4.6e-06
dHC enriched	ENSRNOG00000015911	1	218816841	218920094	-	Lrp5	protein_coding	131.227	79.9281	0.609081	-0.715293	105.578	0.00011122	0.00056833
dHC enriched	ENSRNOG00000030180	1	226500692	226501920	-	Lrrc10b	protein_coding	828.505	22.4006	0.0270373	-5.2089	425.453	1.35e-171	9.68e-169
dHC enriched	ENSRNOG00000008098	4	56110658	56114254	-	Lrrc4	protein_coding	1126.96	808.904	0.717776	-0.478395	967.932	1.1e-09	1.04e-08
dHC enriched	ENSRNOG00000012015	8	65481592	65587658	-	Lrrc49	protein_coding	982.795	862.917	0.878024	-0.187668	922.856	0.0138991	0.0434504
dHC enriched	ENSRNOG00000019418	1	100447998	100468868	+	Lrrc4b	protein_coding	2557.06	2056.54	0.804261	-0.314265	2306.8	2.05e-06	1.34e-05
dHC enriched	ENSRNOG00000002121	14	5086054	5101177	-	Lrrc8d	protein_coding	749.049	377.04	0.503359	-0.990341	563.044	2.07e-26	5.55e-25
dHC enriched	ENSRNOG00000006802	4	139670092	139673143	+	Lrrn1	protein_coding	1196.45	379.918	0.317539	-1.655	788.183	1.2e-73	1.36e-71
dHC enriched	ENSRNOG00000009691	13	49660356	49730275	+	Lrrn2	protein_coding	2976.09	1456.26	0.489318	-1.03115	2216.17	2.88e-48	1.72e-46
dHC enriched	ENSRNOG00000006093	4	108301129	108316373	+	LRRTM1	protein_coding	810.053	440.214	0.543439	-0.87981	625.134	1.03e-24	2.49e-23
dHC enriched	ENSRNOG00000021938	4	110699557	111497643	+	Lrrtm4	protein_coding	445.21	307.244	0.690111	-0.535099	376.227	4.07e-07	2.93e-06
dHC enriched	ENSRNOG00000008733	4	123162086	123168330	+	Lsm3	protein_coding	131.195	97.3261	0.741842	-0.430817	114.261	0.0142671	0.0444071
dHC enriched	ENSRNOG00000058677	4	45555077	45560943	+	Lsm8	protein_coding	337.869	141.822	0.419753	-1.25239	239.846	8.5e-22	1.79e-20
dHC enriched	ENSRNOG00000019264	4	157822840	157829241	-	Ltbr	protein_coding	142.409	96.7857	0.679633	-0.557172	119.597	0.0034789	0.0130052
dHC enriched	ENSRNOG00000003244	10	35737664	35739625	-	Ltc4s	protein_coding	26.3574	14.3124	0.543012	-0.880944	20.3349	0.03361	0.0915716
dHC enriched	ENSRNOG00000015217	1	7323040	7335936	-	Ltv1	protein_coding	221.069	170.891	0.773022	-0.371419	195.98	0.0105782	0.0343291
dHC enriched	ENSRNOG00000004610	7	38819771	38826862	+	Lum	protein_coding	33.2522	13.7289	0.412873	-1.27623	23.4905	0.00127724	0.00530255
dHC enriched	ENSRNOG00000022402	5	154868534	154907634	+	Luzp1	protein_coding	1175.07	690.159	0.587335	-0.767744	932.613	5.46e-19	9.91e-18
dHC enriched	ENSRNOG00000013572	2	164628566	164634434	-	Lxn	protein_coding	242.065	130.28	0.538201	-0.893782	186.173	5.82e-09	5.17e-08
dHC enriched	ENSRNOG00000007091	7	116355698	116359862	+	Ly6e	protein_coding	1512.58	1202.78	0.795187	-0.330634	1357.68	3.72e-06	2.34e-05
dHC enriched	ENSRNOG00000008320	5	14559334	14588422	-	Lypla1	protein_coding	236.426	183.345	0.775488	-0.366823	209.886	0.00690789	0.0237346
dHC enriched	ENSRNOG00000015848	4	179481263	179481603	+	Lyrm5	protein_coding	33.5134	17.7661	0.53012	-0.915608	25.6398	0.0171682	0.0519883
dHC enriched	ENSRNOG00000058094	17	90370882	90522091	-	Lyst	protein_coding	1343.6	469.505	0.349439	-1.51689	906.551	8.94e-56	6.46e-54
dHC enriched	ENSRNOG00000026902	1	175663266	175676699	-	Lyve1	protein_coding	25.3343	12.4817	0.49268	-1.02128	18.908	0.0185138	0.0555157
dHC enriched	ENSRNOG00000019350	8	130220018	130224444	-	Lyzl4	protein_coding	112.088	10.5238	0.0938891	-3.4129	61.3058	4.74e-22	1.02e-20
dHC enriched	ENSRNOG00000021231	3	123175860	123179644	-	Lzts3	protein_coding	2018.9	1817.09	0.900039	-0.151941	1917.99	0.012718	0.0402115
dHC enriched	ENSRNOG00000012428	19	48194804	48196748	-	Maf	protein_coding	95.4275	69.2907	0.726109	-0.461743	82.3591	0.0279733	0.0784256
dHC enriched	ENSRNOG00000021023	1	89345429	89360733	-	Mag	protein_coding	2100.91	1172.85	0.558257	-0.841	1636.88	0.00543147	0.0192502
dHC enriched	ENSRNOG00000003178	X	19243759	19245007	+	Mageh1	protein_coding	242.375	196.561	0.810979	-0.302263	219.468	0.0232791	0.0672152
dHC enriched	ENSRNOG00000012778	5	127480485	127487603	+	Magoh	protein_coding	124.492	95.2409	0.765038	-0.386397	109.866	0.0314062	0.0863469
dHC enriched	ENSRNOG00000051408	X	77020402	77061667	-	Magt1	protein_coding	210.955	133.064	0.630769	-0.664817	172.01	5.76e-06	3.54e-05
dHC enriched	ENSRNOG00000015445	3	120209647	120233655	-	Mal	protein_coding	2267.25	1369.42	0.604	-0.727379	1818.33	0.0166959	0.0507994
dHC enriched	ENSRNOG00000005879	8	11931767	12251099	+	Maml2	protein_coding	260.321	52.1276	0.200244	-2.32017	156.224	1.56e-39	6.81e-38
dHC enriched	ENSRNOG00000012055	1	142143799	142164263	-	Man2a2	protein_coding	1833.39	1334.74	0.72802	-0.457949	1584.06	7.44e-11	7.78e-10
dHC enriched	ENSRNOG00000031453	3	153491151	153520735	+	Manbal	protein_coding	695.807	513.262	0.737651	-0.438991	604.535	3.03e-07	2.21e-06
dHC enriched	ENSRNOG00000028526	4	168363190	168382837	-	Mansc1	protein_coding	100.166	74.6456	0.745222	-0.424259	87.4056	0.0372497	0.0996879
dHC enriched	ENSRNOG00000029778	X	6430594	6533534	+	Maob	protein_coding	734.665	553.593	0.753532	-0.408259	644.129	5.85e-05	0.00031341
dHC enriched	ENSRNOG00000017905	19	53629779	53646058	+	Map1lc3b2	protein_coding	1634.55	1481.47	0.906346	-0.141866	1558.01	0.0304678	0.08413
dHC enriched	ENSRNOG00000010176	8	69134223	69164758	-	Map2k1	protein_coding	4026.61	3416.68	0.848526	-0.236969	3721.65	4.25e-05	0.00023246
dHC enriched	ENSRNOG00000023521	1	84473071	84491466	-	Map3k10	protein_coding	2294.71	2013.86	0.87761	-0.188348	2154.29	0.00300874	0.0114088
dHC enriched	ENSRNOG00000020773	1	221043119	221056417	+	Map3k11	protein_coding	254.429	203.567	0.800092	-0.321762	228.998	0.014082	0.0439593
dHC enriched	ENSRNOG00000061424	10	94280703	94349368	+	Map3k3	protein_coding	385.294	292.552	0.759297	-0.397265	338.923	0.00038566	0.00178749
dHC enriched	ENSRNOG00000017419	1	48625743	48711642	+	Map3k4	protein_coding	506.61	413.544	0.816296	-0.292836	460.077	0.0055395	0.0195887
dHC enriched	ENSRNOG00000020748	8	118013612	118159933	+	Map4	protein_coding	7252.89	2007.95	0.276848	-1.85283	4630.42	1.21e-152	6.12e-150
dHC enriched	ENSRNOG00000014013	9	46657575	46782545	+	Map4k4	protein_coding	1720.13	1276.22	0.74193	-0.430645	1498.17	1.54e-08	1.3e-07
dHC enriched	ENSRNOG00000001911	11	84321078	84327307	+	Map6d1	protein_coding	512.72	258.296	0.503776	-0.989145	385.508	2.23e-17	3.62e-16
dHC enriched	ENSRNOG00000012701	1	15620653	15748203	+	Map7	protein_coding	1011.41	586.152	0.57954	-0.787019	798.78	7.37e-15	1.03e-13
dHC enriched	ENSRNOG00000000513	20	5933303	5995137	+	Mapk14	protein_coding	839.302	662.963	0.789898	-0.340262	751.133	0.00018978	0.00093399
dHC enriched	ENSRNOG00000053583	1	198192773	198198975	+	Mapk3	protein_coding	1787.88	1502.35	0.8403	-0.251024	1645.11	0.00033976	0.00159495
dHC enriched	ENSRNOG00000017583	3	13484838	13701757	+	Mapkap1	protein_coding	616.582	464.297	0.753018	-0.409244	540.439	1.41e-05	8.24e-05
dHC enriched	ENSRNOG00000014832	8	116012121	116045954	-	Mapkapk3	protein_coding	158.993	102.902	0.647215	-0.627684	130.947	0.00018527	0.00091282
dHC enriched	ENSRNOG00000037850	13	102724348	102756174	-	March2	protein_coding	344.503	172.794	0.501575	-0.995462	258.649	5.23e-15	7.36e-14
dHC enriched	ENSRNOG00000007769	7	18559205	18585313	-	March2	protein_coding	822.991	596.26	0.724504	-0.464935	709.626	7.84e-08	6.14e-07
dHC enriched	ENSRNOG00000016472	9	79782845	79898912	-	March4	protein_coding	218.672	172.528	0.788981	-0.341937	195.6	0.0125521	0.0397967
dHC enriched	ENSRNOG00000017069	1	80335526	80367328	-	Mark4	protein_coding	1100.44	971.584	0.882904	-0.179672	1036.01	0.0212882	0.0622137
dHC enriched	ENSRNOG00000042620	1	261389804	261393736	+	Marveld1	protein_coding	56.3573	34.5043	0.612242	-0.707825	45.4308	0.0150159	0.0464337
dHC enriched	ENSRNOG00000052167	2	30612106	30634243	-	Marveld2	protein_coding	48.1311	11.538	0.239721	-2.06057	29.8345	3.71e-08	3.01e-07
dHC enriched	ENSRNOG00000014971	1	48077033	48108216	+	Mas1	protein_coding	641.966	206.995	0.322439	-1.6329	424.481	4.76e-43	2.4e-41
dHC enriched	ENSRNOG00000022753	16	20395845	20414767	+	Mast3	protein_coding	5218.2	2518.45	0.482628	-1.05102	3868.32	1.37e-80	1.78e-78
dHC enriched	ENSRNOG00000006060	7	72985495	73207695	+	Matn2	protein_coding	448.198	181.372	0.404669	-1.30519	314.785	3.98e-28	1.14e-26
dHC enriched	ENSRNOG00000008049	6	99984260	100011388	-	Max	protein_coding	547.243	447.974	0.818601	-0.288768	497.608	0.00199529	0.00793868
dHC enriched	ENSRNOG00000011853	18	65814026	65885114	+	Mbd2	protein_coding	304.376	226.874	0.745374	-0.423963	265.625	0.0006953	0.00305627
dHC enriched	ENSRNOG00000010737	15	105640097	105797932	+	Mbnl2	protein_coding	1685.1	1496.59	0.888131	-0.171155	1590.84	0.0212147	0.0620672
dHC enriched	ENSRNOG00000061050	6	44009872	44131387	+	Mboat2	protein_coding	417.242	324.225	0.777068	-0.363887	370.734	0.0004685	0.00213801
dHC enriched	ENSRNOG00000016516	18	79326738	79437310	+	Mbp	protein_coding	33872.6	17551.4	0.518158	-0.948535	25712	0.00053099	0.00239775
dHC enriched	ENSRNOG00000015173	19	52146808	52206310	-	Mbtps1	protein_coding	1177.52	906.733	0.770038	-0.376998	1042.13	1.42e-07	1.08e-06
dHC enriched	ENSRNOG00000017752	2	30175018	30246010	-	Mccc2	protein_coding	380.977	248.704	0.652806	-0.615273	314.841	8.38e-07	5.79e-06
dHC enriched	ENSRNOG00000001833	11	89511191	89524892	+	Mcm4	protein_coding	242.131	148.551	0.613517	-0.704825	195.341	4.27e-07	3.07e-06
dHC enriched	ENSRNOG00000013282	2	3662763	4088106	+	Mctp1	protein_coding	356.384	188.023	0.527585	-0.922525	272.203	6.25e-14	8.28e-13
dHC enriched	ENSRNOG00000002563	X	124894466	124906162	+	Mcts1	protein_coding	406.351	293.94	0.723366	-0.467202	350.146	3.73e-05	0.00020595
dHC enriched	ENSRNOG00000002563	X	124894466	124906162	+	Mcts1	protein_coding	406.351	293.94	0.723366	-0.467202	350.146	3.73e-05	0.00020595
dHC enriched	ENSRNOG00000000536	20	8515142	8574082	-	Mdga1	protein_coding	261.15	31.3972	0.120226	-3.05617	146.274	1.97e-53	1.32e-51
dHC enriched	ENSRNOG00000017560	3	80841005	80842916	-	Mdk	protein_coding	197.208	106.352	0.539288	-0.890871	151.78	4.51e-08	3.62e-07
dHC enriched	ENSRNOG00000006304	7	60719066	60743328	-	Mdm2	protein_coding	316.972	255.806	0.80703	-0.309305	286.389	0.00794365	0.026843
dHC enriched	ENSRNOG00000009715	8	94256839	94368834	-	Me1	protein_coding	925.802	811.878	0.876946	-0.189441	868.84	0.0341206	0.0926547
dHC enriched	ENSRNOG00000005606	10	86103600	86144880	-	Med1	protein_coding	626.542	515.939	0.823471	-0.28021	571.24	0.00199271	0.00793211
dHC enriched	ENSRNOG00000003792	X	10964187	11080871	+	Med14	protein_coding	1026.64	843.567	0.821674	-0.283361	935.106	0.00011357	0.00057962
dHC enriched	ENSRNOG00000001877	11	87553868	87628502	-	Med15	protein_coding	849.622	724.698	0.852965	-0.229441	787.16	0.0062435	0.0217209
dHC enriched	ENSRNOG00000013933	3	7884822	8059003	+	Med27	protein_coding	243.272	190.983	0.785059	-0.349127	217.128	0.0127375	0.0402481
dHC enriched	ENSRNOG00000047756	1	128209971	128341263	-	Mef2a	protein_coding	1093.12	807.011	0.738263	-0.437794	950.066	1.48e-06	9.88e-06
dHC enriched	ENSRNOG00000013674	18	52215682	52366238	+	Megf10	protein_coding	481.51	209.237	0.434543	-1.20243	345.373	2.14e-18	3.75e-17
dHC enriched	ENSRNOG00000010634	8	69971778	70184742	+	Megf11	protein_coding	354.763	163.22	0.460082	-1.12004	258.991	2.95e-17	4.77e-16
dHC enriched	ENSRNOG00000005932	5	86586996	86696388	-	Megf9	protein_coding	1066.42	819.906	0.76884	-0.379244	943.162	1.3e-06	8.75e-06
dHC enriched	ENSRNOG00000007003	7	123308041	123361391	+	Mei1	protein_coding	173.905	10.3123	0.0592986	-4.07586	92.1086	6.83e-18	1.15e-16
dHC enriched	ENSRNOG00000006588	6	56625650	56689238	+	Meox2	protein_coding	24.5664	1.27264	0.0518042	-4.27079	12.9195	2.04e-09	1.9e-08
dHC enriched	ENSRNOG00000002154	14	6782012	6793558	-	Mepe	protein_coding	75.4114	46.4712	0.616236	-0.698444	60.9413	0.00416606	0.0152233
dHC enriched	ENSRNOG00000017319	3	121235119	121342444	+	Mertk	protein_coding	309.757	241.589	0.779932	-0.358579	275.673	0.00275879	0.0105705
dHC enriched	ENSRNOG00000052745	4	44774741	44852665	+	Met	protein_coding	146.037	81.8215	0.56028	-0.835781	113.929	8.52e-06	5.12e-05
dHC enriched	ENSRNOG00000019692	10	15164439	15166457	-	Metrn	protein_coding	543.554	291.595	0.536459	-0.898461	417.574	1.95e-14	2.66e-13
dHC enriched	ENSRNOG00000046202	10	110893232	110907243	+	Metrnl	protein_coding	34.0462	16.006	0.470124	-1.08889	25.0261	0.00461066	0.0166779
dHC enriched	ENSRNOG00000036918	4	183656013	183665754	+	Mettl20	protein_coding	23.1996	8.55611	0.368805	-1.43907	15.8778	0.00299526	0.0113652
dHC enriched	ENSRNOG00000001376	7	141973553	141981432	+	Mettl7a	protein_coding	424.423	273.828	0.645178	-0.632231	349.126	4.97e-08	3.98e-07
dHC enriched	ENSRNOG00000025142	1	144831523	144835747	+	Mex3b	protein_coding	267.661	210.707	0.787217	-0.345166	239.184	0.0090785	0.03011
dHC enriched	ENSRNOG00000015777	18	69549937	69571736	+	Mex3c	protein_coding	349.938	248.756	0.710856	-0.492372	299.347	0.00018593	0.00091553
dHC enriched	ENSRNOG00000002443	10	42933077	42945564	+	Mfap3	protein_coding	149.068	103.192	0.692247	-0.530641	126.13	0.00204527	0.00811877
dHC enriched	ENSRNOG00000011775	16	32738265	32753278	-	Mfap3l	protein_coding	850.521	511.774	0.601719	-0.732839	681.148	2.7e-16	4.12e-15
dHC enriched	ENSRNOG00000008133	7	119978983	119996824	-	Mfng	protein_coding	57.3517	30.5846	0.533282	-0.90703	43.9682	0.00320408	0.0120723
dHC enriched	ENSRNOG00000013790	2	164747677	164767682	+	Mfsd1	protein_coding	456.298	364.325	0.798437	-0.32475	410.312	0.00154722	0.0063212
dHC enriched	ENSRNOG00000014008	5	140642885	140657745	-	Mfsd2a	protein_coding	150.145	107.646	0.716951	-0.480054	128.895	0.00379073	0.0140096
dHC enriched	ENSRNOG00000003235	10	35726544	35736338	+	Mgat4b	protein_coding	676.799	456.751	0.67487	-0.567318	566.775	2.04e-10	2.05e-09
dHC enriched	ENSRNOG00000000569	20	29897594	29919998	+	MGC112715	protein_coding	352.051	228.003	0.647642	-0.626731	290.027	1.45e-07	1.1e-06
dHC enriched	ENSRNOG00000014508	4	120671489	120771088	+	Mgll	protein_coding	1261.41	1068.8	0.847307	-0.239043	1165.11	0.0007215	0.00315502
dHC enriched	ENSRNOG00000005695	4	170856751	170860225	-	Mgp	protein_coding	58.9205	29.0731	0.493429	-1.01908	43.9968	0.00038077	0.00176909
dHC enriched	ENSRNOG00000003234	10	10833519	10881977	-	Mgrn1	protein_coding	2893.86	2639.17	0.911991	-0.132909	2766.51	0.0161394	0.0493792
dHC enriched	ENSRNOG00000007743	4	172119331	172134607	+	Mgst1	protein_coding	86.0147	46.5711	0.541431	-0.88515	66.2929	0.00013248	0.00066942
dHC enriched	ENSRNOG00000000307	20	46199981	46211930	+	Mical1	protein_coding	339.861	66.1972	0.194777	-2.3601	203.029	3.27e-45	1.79e-43
dHC enriched	ENSRNOG00000026212	7	120345180	120375156	+	Micall1	protein_coding	425.712	267.935	0.629381	-0.667995	346.824	4.37e-09	3.92e-08
dHC enriched	ENSRNOG00000012767	16	55045619	55132191	-	Micu3	protein_coding	603.963	515.925	0.854233	-0.227298	559.944	0.0111359	0.0359022
dHC enriched	ENSRNOG00000003613	X	25458771	25628272	-	Mid1	protein_coding	216.488	70.2579	0.324535	-1.62355	143.373	1.2e-21	2.51e-20
dHC enriched	ENSRNOG00000003228	X	13114569	13116743	-	Mid1ip1	protein_coding	667.039	366.119	0.548871	-0.86546	516.579	1.74e-16	2.7e-15
dHC enriched	ENSRNOG00000033508	10	57185347	57238531	+	Mink1	protein_coding	6504.31	5257.24	0.80827	-0.30709	5880.77	6.47e-10	6.28e-09
dHC enriched	ENSRNOG00000055598	11	61996027	61996122	-	Mir568	miRNA	66.4635	10.6608	0.160401	-2.64024	38.5622	2.12e-13	2.7e-12
dHC enriched	ENSRNOG00000019657	16	20531720	20534209	-	Mk1	protein_coding	135.856	94.4598	0.695291	-0.52431	115.158	0.00296876	0.0112771
dHC enriched	ENSRNOG00000028137	1	207993895	208020454	-	Mki67	protein_coding	94.949	39.2249	0.413116	-1.27538	67.0869	1.48e-07	1.13e-06
dHC enriched	ENSRNOG00000018803	7	122234012	122403667	-	Mkl1	protein_coding	791.471	493.916	0.624048	-0.680271	642.694	1.32e-10	1.35e-09
dHC enriched	ENSRNOG00000010381	5	134691881	134730893	+	Mknk1	protein_coding	325.474	156.892	0.482042	-1.05277	241.183	1.91e-15	2.76e-14
dHC enriched	ENSRNOG00000029028	7	11908107	11919156	+	Mknk2	protein_coding	591.122	460.516	0.779054	-0.360205	525.819	0.00021678	0.00105506
dHC enriched	ENSRNOG00000009280	4	67185138	67206426	-	Mkrn1	protein_coding	1017.65	848.385	0.833671	-0.26245	933.018	0.00065797	0.00290852
dHC enriched	ENSRNOG00000032871	7	129949967	129970550	-	Mlc1	protein_coding	3550.34	2014.05	0.567283	-0.81786	2782.19	1.6e-34	5.8e-33
dHC enriched	ENSRNOG00000016589	4	157452607	157457249	+	Mlf2	protein_coding	3791.88	3471.18	0.915423	-0.127489	3631.53	0.0339202	0.0922269
dHC enriched	ENSRNOG00000001113	12	14021727	14078134	+	Mmd2	protein_coding	2138.38	1314.59	0.61476	-0.701905	1726.49	2.65e-23	6e-22
dHC enriched	ENSRNOG00000010947	15	33074441	33083655	+	Mmp14	protein_coding	78.5159	42.1305	0.536585	-0.898121	60.3232	0.00069591	0.00305816
dHC enriched	ENSRNOG00000012622	19	10079765	10101451	-	Mmp15	protein_coding	473.601	254.672	0.537735	-0.895032	364.137	7.25e-17	1.15e-15
dHC enriched	ENSRNOG00000006778	7	3216497	3224201	+	Mmp19	protein_coding	22.6147	11.7965	0.521629	-0.938903	17.2056	0.0361628	0.0972028
dHC enriched	ENSRNOG00000017477	5	173078590	173081839	-	Mmp23	protein_coding	43.3443	3.21295	0.0741262	-3.75387	23.2786	2.82e-13	3.57e-12
dHC enriched	ENSRNOG00000047028	3	151310598	151355401	+	Mmp24	protein_coding	1091.78	852.766	0.781081	-0.356455	972.27	5.64e-06	3.47e-05
dHC enriched	ENSRNOG00000059474	4	115024927	115041899	+	Mob1a	protein_coding	218.241	154.844	0.709507	-0.49511	186.543	0.00072112	0.00315444
dHC enriched	ENSRNOG00000018700	8	128824508	128850358	+	Mobp	protein_coding	3972.1	1949.64	0.490834	-1.02669	2960.87	0.00114631	0.00480541
dHC enriched	ENSRNOG00000000775	20	2004052	2014286	+	Mog	protein_coding	968.392	554.024	0.572107	-0.805644	761.208	0.00070076	0.00307481
dHC enriched	ENSRNOG00000001396	12	22165486	22169241	+	Mospd3	protein_coding	204.797	152.716	0.745691	-0.42335	178.757	0.00354224	0.0132104
dHC enriched	ENSRNOG00000012415	1	53026608	53038229	-	Mpc1	protein_coding	806.042	693.079	0.859856	-0.217833	749.561	0.00602661	0.0211159
dHC enriched	ENSRNOG00000033653	10	89930241	89959176	-	Mpp3	protein_coding	1212.23	664.01	0.547758	-0.868389	938.121	4.51e-27	1.24e-25
dHC enriched	ENSRNOG00000018760	17	60059949	60250352	+	Mpp7	protein_coding	90.5701	25.9425	0.286435	-1.80372	58.2563	3.35e-11	3.63e-10
dHC enriched	ENSRNOG00000004863	3	97721668	97896422	+	Mpped2	protein_coding	634.631	423.987	0.668085	-0.581897	529.309	8.4e-10	8.08e-09
dHC enriched	ENSRNOG00000000185	7	119626637	119631425	+	Mpst	protein_coding	171.725	132.51	0.77164	-0.374	152.117	0.0162024	0.0495169
dHC enriched	ENSRNOG00000019394	16	20432899	20435974	+	Mpv17l2	protein_coding	201.136	121.375	0.603449	-0.728697	161.256	1.93e-06	1.27e-05
dHC enriched	ENSRNOG00000003522	13	72770554	72789853	-	Mr1	protein_coding	31.54	12.7734	0.404992	-1.30404	22.1567	0.00139824	0.00575905
dHC enriched	ENSRNOG00000014060	8	107629028	107681512	-	Mras	protein_coding	2332.02	1584.42	0.67942	-0.557624	1958.22	4.31e-20	8.35e-19
dHC enriched	ENSRNOG00000018251	17	81352700	81433743	+	Mrc1	protein_coding	32.1822	17.7583	0.551807	-0.857765	24.9703	0.0259442	0.0735036
dHC enriched	ENSRNOG00000006548	10	93520132	93581296	+	Mrc2	protein_coding	167.215	78.8061	0.471286	-1.08533	123.011	4.07e-09	3.66e-08
dHC enriched	ENSRNOG00000024426	18	69841053	69849389	+	Mro	protein_coding	90.6231	40.2744	0.444416	-1.17002	65.4487	1.03e-06	7.03e-06
dHC enriched	ENSRNOG00000010855	15	38095803	38097835	+	Mrp63	protein_coding	205.888	164.641	0.799666	-0.322531	185.265	0.0224253	0.0650446
dHC enriched	ENSRNOG00000010540	10	85257876	85269806	+	Mrpl45	protein_coding	303.619	249.752	0.822584	-0.281765	276.685	0.0194641	0.0578209
dHC enriched	ENSRNOG00000024845	2	197974761	197982385	-	Mrps21	protein_coding	281.236	227.896	0.810338	-0.303404	254.566	0.0130508	0.0411124
dHC enriched	ENSRNOG00000047984	8	106604379	106617597	-	Mrps22	protein_coding	260.718	212.025	0.813234	-0.298258	236.372	0.0244338	0.0699503
dHC enriched	ENSRNOG00000026528	4	67607273	67610710	-	Mrps33	protein_coding	313.693	258.576	0.824296	-0.278765	286.135	0.0187239	0.0559993
dHC enriched	ENSRNOG00000059381	11	32211115	32263899	+	Mrps6	protein_coding	214.131	157.577	0.735891	-0.442435	185.854	0.00188532	0.00753427
dHC enriched	ENSRNOG00000015796	6	11215939	11274932	-	Msh2	protein_coding	224.027	154.634	0.690248	-0.534814	189.331	0.00020586	0.00100649
dHC enriched	ENSRNOG00000030118	X	65226748	65295810	+	Msn	protein_coding	248.606	174.785	0.703063	-0.508275	211.695	0.0002562	0.00123054
dHC enriched	ENSRNOG00000012440	15	47488894	47800024	-	Msra	protein_coding	174.542	104.57	0.599112	-0.739102	139.556	9.51e-06	5.68e-05
dHC enriched	ENSRNOG00000055314	10	14105750	14111463	+	Msrb1	protein_coding	332.193	222.866	0.670893	-0.575845	277.529	3.94e-06	2.48e-05
dHC enriched	ENSRNOG00000006876	14	77712240	77716059	+	Msx1	protein_coding	43.5468	6.24184	0.143336	-2.80252	24.8943	1.09e-10	1.12e-09
dHC enriched	ENSRNOG00000028841	20	3677474	3677847	+	Mt1m	protein_coding	21.0527	7.14248	0.339267	-1.55951	14.0976	0.00269273	0.0103451
dHC enriched	ENSRNOG00000043098	19	11307967	11308740	-	Mt2A	protein_coding	226.757	83.6932	0.369088	-1.43796	155.225	1.44e-17	2.37e-16
dHC enriched	ENSRNOG00000018958	19	11324698	11326139	-	Mt3	protein_coding	2164.75	1620.14	0.748416	-0.418088	1892.44	4.95e-07	3.53e-06
dHC enriched	ENSRNOG00000019913	1	225140863	225149583	+	Mta2	protein_coding	641.744	457.646	0.713128	-0.487767	549.695	8.8e-08	6.85e-07
dHC enriched	ENSRNOG00000006615	5	107711077	107777530	+	Mtap	protein_coding	133.72	103.045	0.770603	-0.375939	118.383	0.0367077	0.0984519
dHC enriched	ENSRNOG00000025724	5	142797366	142842122	+	Mtf1	protein_coding	63.5188	42.5436	0.669779	-0.578243	53.0312	0.0276657	0.0777152
dHC enriched	ENSRNOG00000014602	8	70952203	70986408	+	Mtfmt	protein_coding	139.742	107.807	0.771472	-0.374315	123.774	0.0302986	0.0837601
dHC enriched	ENSRNOG00000016937	5	152736585	152746588	-	Mtfr1l	protein_coding	662.053	570.41	0.861577	-0.214948	616.232	0.0112842	0.0362917
dHC enriched	ENSRNOG00000005602	6	99282850	99350340	+	Mthfd1	protein_coding	383.352	308.403	0.80449	-0.313853	345.878	0.00778935	0.0263786
dHC enriched	ENSRNOG00000010833	4	115004448	115015965	-	Mthfd2	protein_coding	50.6738	26.9625	0.532079	-0.910286	38.8181	0.00297235	0.0112882
dHC enriched	ENSRNOG00000002697	18	291780	325377	-	Mtmr1	protein_coding	539.683	432.939	0.802209	-0.31795	486.311	0.00103513	0.00438744
dHC enriched	ENSRNOG00000016090	1	125124743	125175857	+	Mtmr10	protein_coding	297.955	201.898	0.677613	-0.561467	249.927	2.05e-05	0.00011699
dHC enriched	ENSRNOG00000022929	2	62236577	62303919	+	Mtmr12	protein_coding	520.158	341.026	0.655621	-0.609067	430.592	2.57e-09	2.37e-08
dHC enriched	ENSRNOG00000007881	4	145195070	145238097	+	Mtmr14	protein_coding	279.186	223.59	0.800864	-0.320371	251.388	0.0106267	0.0344605
dHC enriched	ENSRNOG00000005923	8	12284528	12333316	+	Mtmr2	protein_coding	675.08	556.158	0.823841	-0.279563	615.619	0.00108184	0.00456069
dHC enriched	ENSRNOG00000017826	1	37743147	37774015	+	Mtrr	protein_coding	191.513	151.073	0.788839	-0.342198	171.293	0.0296691	0.0823876
dHC enriched	ENSRNOG00000009001	7	98820812	98960837	-	Mtss1	protein_coding	616.707	416.49	0.675345	-0.566304	516.599	8.27e-08	6.45e-07
dHC enriched	ENSRNOG00000017500	19	40905847	40925660	-	Mtss1l	protein_coding	2245.87	1893.78	0.843226	-0.246009	2069.83	0.00013233	0.00066884
dHC enriched	ENSRNOG00000010205	4	84854386	84871757	+	Mturn	protein_coding	585.734	397.293	0.678282	-0.560043	491.514	2.91e-09	2.66e-08
dHC enriched	ENSRNOG00000008027	5	64412895	64423725	+	Murc	protein_coding	62.8465	25.5646	0.406778	-1.29769	44.2055	7.97e-06	4.81e-05
dHC enriched	ENSRNOG00000017172	3	12780100	12944494	-	Mvb12b	protein_coding	2854.07	1728.92	0.605775	-0.723146	2291.5	2.08e-26	5.57e-25
dHC enriched	ENSRNOG00000020182	1	198420806	198450047	-	Mvp	protein_coding	114.551	80.9443	0.706621	-0.500992	97.7477	0.0151342	0.0467591
dHC enriched	ENSRNOG00000001963	11	38035450	38059950	+	Mx2	protein_coding	176.322	125.61	0.712393	-0.489254	150.966	0.00713639	0.0244416
dHC enriched	ENSRNOG00000015033	14	81819415	81833456	+	Mxd4	protein_coding	838.564	657.528	0.784112	-0.350869	748.046	1.99e-05	0.00011392
dHC enriched	ENSRNOG00000019244	5	173288447	173292929	+	Mxra8	protein_coding	85.0428	38.6121	0.454031	-1.13914	61.8274	2.77e-06	1.78e-05
dHC enriched	ENSRNOG00000019627	1	100506704	100530183	-	Mybpc2	protein_coding	26.7688	13.4685	0.503143	-0.99096	20.1186	0.0188223	0.056225
dHC enriched	ENSRNOG00000003336	13	51034256	51041902	+	Mybph	protein_coding	906.318	387.347	0.427385	-1.22639	646.832	1.55e-37	6.29e-36
dHC enriched	ENSRNOG00000004500	7	102586313	102591237	+	Myc	protein_coding	56.948	26.3575	0.462834	-1.11143	41.6528	0.00018202	0.00089757
dHC enriched	ENSRNOG00000014259	5	140692779	140698609	+	Mycl	protein_coding	333.179	126.889	0.380843	-1.39273	230.034	3.11e-25	7.76e-24
dHC enriched	ENSRNOG00000020014	1	100608966	100671074	-	Myh14	protein_coding	464.065	271.63	0.585327	-0.772686	367.847	6.38e-12	7.31e-11
dHC enriched	ENSRNOG00000025757	15	33605654	33629699	-	Myh6	protein_coding	97.4831	55.8927	0.573358	-0.802493	76.6879	0.00053187	0.0023992
dHC enriched	ENSRNOG00000015278	9	119325283	119332967	-	Myl12a	protein_coding	192.732	110.793	0.574853	-0.798734	151.762	2.3e-06	1.5e-05
dHC enriched	ENSRNOG00000015733	9	119307176	119321500	-	Myl12b	protein_coding	2076.49	1798.94	0.866335	-0.207003	1937.71	0.00160232	0.0065277
dHC enriched	ENSRNOG00000020246	3	152857592	152863960	+	Myl9	protein_coding	95.9077	48.7287	0.508079	-0.976875	72.3182	0.00020665	0.00100949
dHC enriched	ENSRNOG00000017579	17	19682040	19703681	-	Mylip	protein_coding	246.963	202.592	0.820333	-0.285719	224.777	0.0371277	0.0993924
dHC enriched	ENSRNOG00000002215	11	69013050	69223158	-	Mylk	protein_coding	187.015	146.071	0.781065	-0.356486	166.543	0.0174754	0.0528069
dHC enriched	ENSRNOG00000010161	2	77868412	78071309	+	Myo10	protein_coding	626.223	468.203	0.747661	-0.419543	547.213	6.3e-05	0.00033633
dHC enriched	ENSRNOG00000059219	10	46840113	46896054	+	Myo15a	protein_coding	15.1335	5.00053	0.330428	-1.59759	10.067	0.00906375	0.0300668
dHC enriched	ENSRNOG00000016483	16	84575150	84939323	-	Myo16	protein_coding	368.585	283.039	0.767907	-0.380997	325.812	0.00130012	0.00538586
dHC enriched	ENSRNOG00000003276	10	67866940	68142864	-	Myo1d	protein_coding	235.103	175.083	0.744707	-0.425254	205.093	0.00393963	0.0144914
dHC enriched	ENSRNOG00000011852	8	87630916	87731269	+	Myo6	protein_coding	1279.52	546.841	0.427378	-1.22642	913.182	2.65e-48	1.59e-46
dHC enriched	ENSRNOG00000016256	16	19669411	19754069	+	Myo9b	protein_coding	877.378	630.495	0.718612	-0.476714	753.936	4.49e-07	3.22e-06
dHC enriched	ENSRNOG00000011754	16	79587640	79671719	-	Myom2	protein_coding	55.3446	13.7466	0.248381	-2.00937	34.5456	4.07e-08	3.29e-07
dHC enriched	ENSRNOG00000028274	1	226260558	226292480	-	Myrf	protein_coding	942.404	559.749	0.593958	-0.751566	751.076	0.00056873	0.00254543
dHC enriched	ENSRNOG00000017346	3	177310753	177341547	+	Myt1	protein_coding	226.574	116.369	0.513603	-0.961274	171.471	9.57e-09	8.29e-08
dHC enriched	ENSRNOG00000001834	11	89277039	89282929	+	Mzt2b	protein_coding	150.868	108.821	0.721299	-0.47133	129.845	0.00620275	0.0216316
dHC enriched	ENSRNOG00000001108	12	628488	650376	-	N4bp2l2	protein_coding	217.615	160.246	0.736372	-0.441494	188.931	0.00183984	0.00736621
dHC enriched	ENSRNOG00000051570	NA	NA	NA	NA	NA	NA	56.357	20.4074	0.362109	-1.4655	38.3822	3.15e-06	2e-05
dHC enriched	ENSRNOG00000056151	NA	NA	NA	NA	NA	NA	952.46	558.943	0.586841	-0.768958	755.701	5e-19	9.11e-18
dHC enriched	ENSRNOG00000002864	19	25783900	25801526	-	Nacc1	protein_coding	1759.22	1321.87	0.751397	-0.412353	1540.54	4.37e-09	3.92e-08
dHC enriched	ENSRNOG00000018231	3	3510041	3574787	-	Nacc2	protein_coding	812.227	520.981	0.641422	-0.640653	666.604	4.05e-13	5.04e-12
dHC enriched	ENSRNOG00000016936	5	172986291	173015494	+	Nadk	protein_coding	671.769	450.778	0.671031	-0.57555	561.273	8.35e-10	8.05e-09
dHC enriched	ENSRNOG00000054157	2	58462588	58504728	+	Nadk2	protein_coding	592.188	363.761	0.614267	-0.703063	477.975	6.7e-13	8.21e-12
dHC enriched	ENSRNOG00000002895	10	10573191	10581516	+	Nagpa	protein_coding	105.325	61.88	0.587516	-0.767299	83.6024	0.0002632	0.00126065
dHC enriched	ENSRNOG00000001494	1	77994203	78012845	+	Napa	protein_coding	4608.29	2619.13	0.568351	-0.815145	3613.71	5.88e-45	3.19e-43
dHC enriched	ENSRNOG00000011363	4	9966891	10002247	+	Napepld	protein_coding	145.77	96.1122	0.659341	-0.600903	120.941	0.00046806	0.00213659
dHC enriched	ENSRNOG00000007939	7	116922944	116926555	-	Naprt	protein_coding	158.963	54.9157	0.345462	-1.5334	106.939	2.86e-15	4.09e-14
dHC enriched	ENSRNOG00000049351	14	82041616	82048251	-	Nat8l	protein_coding	3786.61	3176	0.838745	-0.253695	3481.31	3.56e-05	0.00019633
dHC enriched	ENSRNOG00000014530	1	104576589	104941552	+	Nav2	protein_coding	781.715	603.619	0.772173	-0.373005	692.667	5.6e-05	0.00030105
dHC enriched	ENSRNOG00000049402	5	157524513	157535664	-	Nbl1	protein_coding	1078.15	844.808	0.783572	-0.351862	961.479	0.00019069	0.00093817
dHC enriched	ENSRNOG00000011751	5	144769452	144779212	-	Ncdn	protein_coding	34108.5	13233.5	0.387983	-1.36594	23671	4.62e-148	2.21e-145
dHC enriched	ENSRNOG00000013313	2	112868662	112933675	+	Nceh1	protein_coding	1170.31	984.643	0.841353	-0.249217	1077.48	0.00212378	0.00837629
dHC enriched	ENSRNOG00000007518	3	67725947	67787990	-	Nckap1	protein_coding	7782.53	6464.12	0.830594	-0.267785	7123.32	9.35e-08	7.26e-07
dHC enriched	ENSRNOG00000004068	6	28677540	28931843	-	Ncoa1	protein_coding	2787.61	1728.5	0.620064	-0.68951	2258.05	2.41e-30	7.62e-29
dHC enriched	ENSRNOG00000019768	16	8302950	8323293	+	Ncoa4	protein_coding	1075.81	930.62	0.865044	-0.209155	1003.21	0.00542837	0.0192472
dHC enriched	ENSRNOG00000001004	12	36871999	37033701	+	Ncor2	protein_coding	2403.7	1898.81	0.789956	-0.340155	2151.26	2.91e-06	1.86e-05
dHC enriched	ENSRNOG00000010620	5	126976456	127022939	+	Ndc1	protein_coding	153.924	99.1157	0.643927	-0.635031	126.52	0.00017748	0.0008767
dHC enriched	ENSRNOG00000058007	10	860521	896938	-	Nde1	protein_coding	47.2155	29.5371	0.625581	-0.676731	38.3763	0.0369762	0.0990332
dHC enriched	ENSRNOG00000006857	4	96562725	96564611	+	Ndnf	protein_coding	102.666	23.1758	0.225739	-2.14727	62.9211	9.6e-16	1.42e-14
dHC enriched	ENSRNOG00000002960	X	6791136	6815583	+	Ndp	protein_coding	72.4049	44.4114	0.613376	-0.705157	58.4081	0.00609383	0.0213166
dHC enriched	ENSRNOG00000007393	7	107734299	107775706	-	Ndrg1	protein_coding	995.532	605.106	0.607822	-0.71828	800.319	0.00034029	0.00159666
dHC enriched	ENSRNOG00000010389	15	28305821	28314459	-	Ndrg2	protein_coding	8806.63	5279.13	0.59945	-0.73829	7042.88	3e-24	7.07e-23
dHC enriched	ENSRNOG00000009577	2	229196616	229496516	+	Ndst4	protein_coding	268.675	5.00053	0.0186118	-5.74764	136.838	1.58e-63	1.4e-61
dHC enriched	ENSRNOG00000005512	4	38233680	38240848	-	Ndufa4	protein_coding	1405.12	1211.42	0.862144	-0.213999	1308.27	0.00233338	0.00909657
dHC enriched	ENSRNOG00000006783	3	37658563	37854561	-	Neb	protein_coding	70.5198	44.8853	0.636491	-0.651787	57.7025	0.00986665	0.0323127
dHC enriched	ENSRNOG00000049452	17	84140489	84488601	-	Nebl	protein_coding	623.392	299.015	0.479659	-1.05992	461.203	7.3e-28	2.08e-26
dHC enriched	ENSRNOG00000015084	19	52086325	52112629	+	Necab2	protein_coding	1640.49	552.092	0.33654	-1.57115	1096.29	9e-102	1.74e-99
dHC enriched	ENSRNOG00000008427	5	159589881	159602251	-	Necap2	protein_coding	275.885	216.419	0.784452	-0.350242	246.152	0.00612047	0.0213924
dHC enriched	ENSRNOG00000004011	7	33543828	33584564	-	Nedd1	protein_coding	38.8641	23.5342	0.605551	-0.723681	31.1991	0.0302072	0.0835447
dHC enriched	ENSRNOG00000058898	8	79323408	79408833	+	Nedd4	protein_coding	7682.92	5839.99	0.760126	-0.395689	6761.46	2.52e-15	3.62e-14
dHC enriched	ENSRNOG00000014548	17	22984844	23179701	+	Nedd9	protein_coding	280.332	163.95	0.584844	-0.773876	222.141	6.18e-09	5.46e-08
dHC enriched	ENSRNOG00000008716	14	85181572	85191557	-	Nefh	protein_coding	1530.58	674.425	0.440634	-1.18235	1102.5	1.66e-49	1.03e-47
dHC enriched	ENSRNOG00000013658	15	44799334	44804574	+	Nefl	protein_coding	8930.17	4870.49	0.545397	-0.874621	6900.33	1.05e-55	7.59e-54
dHC enriched	ENSRNOG00000013916	15	44855310	44860604	-	Nefm	protein_coding	2195.26	1059.5	0.482629	-1.05101	1627.38	1.66e-37	6.68e-36
dHC enriched	ENSRNOG00000010897	3	22811927	22888598	+	Nek6	protein_coding	461.529	332.441	0.720303	-0.473324	396.985	5.83e-06	3.58e-05
dHC enriched	ENSRNOG00000000657	13	55488531	55561750	-	Nek7	protein_coding	385.275	254.243	0.659902	-0.599677	319.759	6.54e-07	4.58e-06
dHC enriched	ENSRNOG00000058572	6	109124330	109162267	-	Nek9	protein_coding	446.709	331.111	0.741225	-0.432017	388.91	4.34e-05	0.00023711
dHC enriched	ENSRNOG00000015675	1	105349069	106218958	+	Nell1	protein_coding	660.662	551.117	0.834189	-0.261554	605.889	0.00207133	0.00820518
dHC enriched	ENSRNOG00000006235	7	136526496	136853957	-	Nell2	protein_coding	12324.6	9074.74	0.73631	-0.441614	10699.7	8.56e-17	1.35e-15
dHC enriched	ENSRNOG00000014006	18	83471342	83584357	+	Neto1	protein_coding	1492.57	724.859	0.485646	-1.04202	1108.71	8.54e-26	2.19e-24
dHC enriched	ENSRNOG00000019031	9	101284902	101290558	+	Neu4	protein_coding	14.4919	5.86591	0.404771	-1.30482	10.1789	0.0333674	0.0909973
dHC enriched	ENSRNOG00000005609	3	66414308	66417741	-	Neurod1	protein_coding	241.29	77.1302	0.319657	-1.6454	159.21	7.5e-25	1.83e-23
dHC enriched	ENSRNOG00000026055	4	85911861	85915099	-	Neurod6	protein_coding	2029.56	1088.37	0.536258	-0.899	1558.96	7.4e-40	3.31e-38
dHC enriched	ENSRNOG00000007948	14	84996905	85088523	-	Nf2	protein_coding	1969.66	1397.3	0.709413	-0.495302	1683.48	7.39e-14	9.76e-13
dHC enriched	ENSRNOG00000012175	3	165245238	165360292	-	Nfatc2	protein_coding	83.2947	18.4475	0.221473	-2.1748	50.8711	7.1e-13	8.69e-12
dHC enriched	ENSRNOG00000054264	19	38039564	38114003	+	Nfatc3	protein_coding	148.15	103.96	0.70172	-0.511033	126.055	0.00307926	0.0116486
dHC enriched	ENSRNOG00000001548	3	62497571	62524996	-	Nfe2l2	protein_coding	198.124	121.514	0.613323	-0.705281	159.819	5.13e-06	3.18e-05
dHC enriched	ENSRNOG00000006966	5	116420690	116751416	+	Nfia	protein_coding	315.564	155.004	0.491198	-1.02562	235.284	2.85e-13	3.59e-12
dHC enriched	ENSRNOG00000009795	5	100439082	100647727	-	Nfib	protein_coding	567.167	232.297	0.409574	-1.2878	399.732	1.24e-34	4.48e-33
dHC enriched	ENSRNOG00000004505	7	11152038	11177664	+	Nfic	protein_coding	238.022	173.789	0.730136	-0.453762	205.906	0.001279	0.00530861
dHC enriched	ENSRNOG00000007390	6	76267228	76270457	-	Nfkbia	protein_coding	131.807	98.9473	0.750698	-0.413695	115.377	0.0187723	0.0561243
dHC enriched	ENSRNOG00000012702	9	14551758	14576967	+	Nfya	protein_coding	181.376	106.81	0.58889	-0.76393	144.093	2.36e-06	1.53e-05
dHC enriched	ENSRNOG00000010735	5	139687448	139749050	-	Nfyc	protein_coding	530.358	435.036	0.820268	-0.285832	482.697	0.00345782	0.0129433
dHC enriched	ENSRNOG00000011719	6	111126261	111132320	-	Ngb	protein_coding	77.8646	43.9768	0.564785	-0.824225	60.9207	0.00074517	0.00324563
dHC enriched	ENSRNOG00000016571	2	204886202	204940453	+	Ngf	protein_coding	59.6113	27.2718	0.457494	-1.12818	43.4416	0.0002423	0.00116737
dHC enriched	ENSRNOG00000005166	13	90437956	90443157	-	Nhlh1	protein_coding	112.977	0.346553	0.00306745	-8.34874	56.662	7.97e-38	3.25e-36
dHC enriched	ENSRNOG00000054375	2	204427608	204432946	+	Nhlh2	protein_coding	17.8635	2.66082	0.148953	-2.74707	10.2622	3.51e-05	0.00019393
dHC enriched	ENSRNOG00000060603	1	13595295	13705396	+	Nhsl1	protein_coding	509.621	151.688	0.297648	-1.74832	330.654	1.63e-42	7.97e-41
dHC enriched	ENSRNOG00000000341	15	4894213	4951917	-	Nid2	protein_coding	42.0602	22.845	0.54315	-0.880579	32.4526	0.00800376	0.0270143
dHC enriched	ENSRNOG00000016353	2	52448715	52492509	-	Nim1k	protein_coding	194.629	139.067	0.714525	-0.484944	166.848	0.001515	0.0062176
dHC enriched	ENSRNOG00000010282	4	152630469	152733633	+	Ninj2	protein_coding	113.233	53.6567	0.473863	-1.07746	83.4446	8.99e-07	6.18e-06
dHC enriched	ENSRNOG00000006255	10	31241394	31258105	-	Nipal4	protein_coding	124.757	55.3365	0.443554	-1.17282	90.0468	0.02388	0.0686276
dHC enriched	ENSRNOG00000003881	13	89722374	89725806	-	Nit1	protein_coding	686.158	552.65	0.805426	-0.312176	619.404	0.00031407	0.00148406
dHC enriched	ENSRNOG00000013085	5	34174411	34813116	-	Nkain3	protein_coding	40.5564	7.48315	0.184512	-2.43821	24.0198	1.39e-08	1.18e-07
dHC enriched	ENSRNOG00000031834	3	176444544	176465162	-	Nkain4	protein_coding	306.884	215.338	0.701692	-0.511091	261.111	0.00019166	0.00094269
dHC enriched	ENSRNOG00000014293	19	19436333	19509087	-	Nkd1	protein_coding	217.702	145.146	0.666721	-0.584844	181.424	0.00011858	0.00060325
dHC enriched	ENSRNOG00000017748	1	211922389	211923929	-	Nkx6-2	protein_coding	80.7661	46.6493	0.577585	-0.791894	63.7077	0.00327546	0.0123089
dHC enriched	ENSRNOG00000011011	1	142721002	142724511	-	Nmb	protein_coding	64.8878	24.5151	0.377808	-1.40428	44.7014	1.4e-06	9.38e-06
dHC enriched	ENSRNOG00000002671	10	81648216	81653717	-	Nme2	protein_coding	1626.97	1256.26	0.77215	-0.373048	1441.61	3.14e-08	2.57e-07
dHC enriched	ENSRNOG00000002989	10	91126689	91160720	+	Nmt1	protein_coding	1948.47	1267.19	0.650354	-0.620703	1607.83	4.11e-20	7.97e-19
dHC enriched	ENSRNOG00000026842	2	52189529	52282548	-	Nnt	protein_coding	482.477	368.437	0.763637	-0.389041	425.457	0.00012333	0.00062576
dHC enriched	ENSRNOG00000037478	12	52072188	52076739	+	Noc4l	protein_coding	332.359	250.302	0.753108	-0.409072	291.331	0.00059527	0.0026573
dHC enriched	ENSRNOG00000017904	17	24015982	24020261	+	Nol7	protein_coding	588.912	433.72	0.736477	-0.441288	511.316	2.66e-06	1.72e-05
dHC enriched	ENSRNOG00000019322	3	3905453	3951025	-	Notch1	protein_coding	516.709	358.626	0.694058	-0.526872	437.667	6.47e-07	4.54e-06
dHC enriched	ENSRNOG00000018835	2	200187184	200317621	+	Notch2	protein_coding	326.579	158.2	0.484416	-1.04568	242.389	1.15e-14	1.59e-13
dHC enriched	ENSRNOG00000004346	7	14138495	14189688	-	Notch3	protein_coding	210.646	134.912	0.640469	-0.642799	172.779	6.26e-05	0.00033431
dHC enriched	ENSRNOG00000015376	1	78420652	78440738	-	Npas1	protein_coding	274.311	192.8	0.702852	-0.508708	233.556	0.00010993	0.00056226
dHC enriched	ENSRNOG00000036685	10	109786222	109786656	+	Npb	protein_coding	29.3949	12.7813	0.434813	-1.20153	21.0881	0.00389377	0.0143545
dHC enriched	ENSRNOG00000012016	18	3616878	3662656	-	Npc1	protein_coding	528.273	363.249	0.687616	-0.540326	445.761	3.3e-06	2.1e-05
dHC enriched	ENSRNOG00000012062	6	108467410	108488330	-	Npc2	protein_coding	682.315	504.776	0.739799	-0.434794	593.546	6.43e-06	3.92e-05
dHC enriched	ENSRNOG00000011967	5	169659188	169744660	+	Nphp4	protein_coding	304.805	180.336	0.591643	-0.757201	242.571	1.57e-09	1.47e-08
dHC enriched	ENSRNOG00000008176	5	164808323	164809705	+	Nppa	protein_coding	40.7071	14.6609	0.360155	-1.47331	27.684	6.53e-05	0.00034751
dHC enriched	ENSRNOG00000014684	2	189840403	189856090	-	Npr1	protein_coding	144.698	97.5551	0.674196	-0.568759	121.127	0.00529583	0.0188355
dHC enriched	ENSRNOG00000003741	10	108682638	108691367	-	Nptx1	protein_coding	7796.66	3744.38	0.480254	-1.05813	5770.52	7.48e-51	4.75e-49
dHC enriched	ENSRNOG00000049213	2	181530832	181531978	-	Npy2r	protein_coding	69.0686	14.8704	0.215299	-2.21559	41.9695	2.64e-11	2.88e-10
dHC enriched	ENSRNOG00000050550	20	47288137	47306318	-	Nr2e1	protein_coding	129.469	79.0176	0.610322	-0.712359	104.243	0.00022236	0.00107949
dHC enriched	ENSRNOG00000010308	1	131448447	131460473	-	Nr2f2	protein_coding	77.1037	49.8838	0.646971	-0.628228	63.4937	0.0100217	0.0327457
dHC enriched	ENSRNOG00000048800	18	32669427	32670665	-	Nr3c1	protein_coding	196.062	157.524	0.803441	-0.315736	176.793	0.0318182	0.0872984
dHC enriched	ENSRNOG00000014096	18	31728373	31749647	-	Nr3c1	protein_coding	842.372	688.545	0.817388	-0.290907	765.458	0.00159329	0.00649245
dHC enriched	ENSRNOG00000034007	19	34448289	34752695	-	Nr3c2	protein_coding	1341.17	189.436	0.141247	-2.8237	765.302	2.6e-171	1.79e-168
dHC enriched	ENSRNOG00000005600	3	43111240	43119159	-	Nr4a2	protein_coding	284.543	89.0697	0.313027	-1.67564	186.806	1.72e-27	4.86e-26
dHC enriched	ENSRNOG00000005964	5	63781801	63821637	+	Nr4a3	protein_coding	650.138	407.267	0.626431	-0.674772	528.702	6.48e-10	6.29e-09
dHC enriched	ENSRNOG00000009354	3	2396143	2398689	+	Nrarp	protein_coding	147.106	83.4582	0.567333	-0.817732	115.282	4.12e-06	2.58e-05
dHC enriched	ENSRNOG00000029535	7	117145961	117151694	-	Nrbp2	protein_coding	1246.54	1080.71	0.866966	-0.205952	1163.63	0.0153912	0.0473998
dHC enriched	ENSRNOG00000001585	11	14658225	14741563	-	Nrip1	protein_coding	566.961	404.717	0.713837	-0.486333	485.839	1.18e-06	7.96e-06
dHC enriched	ENSRNOG00000013290	1	174385424	174411141	-	Nrip3	protein_coding	6747.27	1537.22	0.227829	-2.13398	4142.25	2.15e-240	2.85e-237
dHC enriched	ENSRNOG00000050767	17	27925057	27969433	-	Nrn1	protein_coding	1265.09	1057.82	0.836159	-0.258151	1161.46	0.00174589	0.00704748
dHC enriched	ENSRNOG00000010744	19	61332351	61485858	+	Nrp1	protein_coding	1254.68	478.366	0.381265	-1.39113	866.524	1.78e-57	1.34e-55
dHC enriched	ENSRNOG00000031232	9	69497121	69612087	+	Nrp2	protein_coding	1054.58	219.042	0.207706	-2.26738	636.809	2.43e-110	5.56e-108
dHC enriched	ENSRNOG00000001752	11	71872830	71889887	+	Nrros	protein_coding	77.536	39.7927	0.513216	-0.962363	58.6644	0.00024217	0.00116737
dHC enriched	ENSRNOG00000016530	2	27942546	27949089	-	Nsa2	protein_coding	394.861	332.311	0.84159	-0.24881	363.586	0.0222168	0.0645816
dHC enriched	ENSRNOG00000008810	3	2262253	2270995	+	Nsmf	protein_coding	14714.3	6640.64	0.451305	-1.14783	10677.5	2.13e-98	3.99e-96
dHC enriched	ENSRNOG00000026793	7	27309966	27363394	+	Nt5dc3	protein_coding	1259.7	761.898	0.604827	-0.725405	1010.8	2.31e-18	4.03e-17
dHC enriched	ENSRNOG00000011071	8	95968652	96012696	+	Nt5e	protein_coding	169.36	52.531	0.310174	-1.68885	110.945	2.59e-16	3.96e-15
dHC enriched	ENSRNOG00000019716	4	158636884	158705886	-	Ntf3	protein_coding	146.395	18.2576	0.124714	-3.0033	82.3264	3.68e-29	1.11e-27
dHC enriched	ENSRNOG00000031136	2	212696624	212852870	-	Ntng1	protein_coding	344.314	184.279	0.535207	-0.901831	264.297	3.59e-13	4.49e-12
dHC enriched	ENSRNOG00000013694	3	7742531	7796385	-	Ntng2	protein_coding	407.49	236.569	0.580553	-0.784501	322.029	1.16e-10	1.19e-09
dHC enriched	ENSRNOG00000013953	2	187143568	187160373	-	Ntrk1	protein_coding	187.447	1.65053	0.00880532	-6.82741	94.5489	1.91e-52	1.26e-50
dHC enriched	ENSRNOG00000018674	1	139890560	140262503	-	Ntrk3	protein_coding	720.831	569.089	0.789489	-0.341008	644.96	6.43e-05	0.00034307
dHC enriched	ENSRNOG00000004179	7	44111151	44121130	-	Nts	protein_coding	315.339	16.0706	0.0509628	-4.29441	165.705	2.23e-23	5.07e-22
dHC enriched	ENSRNOG00000049054	6	41917132	41923542	+	Ntsr2	protein_coding	1021.98	668.053	0.653688	-0.613327	845.015	2.44e-13	3.1e-12
dHC enriched	ENSRNOG00000015090	10	14244203	14247886	-	Nubp2	protein_coding	261.896	203.948	0.778738	-0.36079	232.922	0.00771121	0.0261603
dHC enriched	ENSRNOG00000022576	9	105680670	105693357	-	Nudt12	protein_coding	173.552	136.855	0.788552	-0.342722	155.203	0.0372909	0.0997518
dHC enriched	ENSRNOG00000061176	20	7155748	7208292	-	Nudt3	protein_coding	2084.84	1667.04	0.799599	-0.322651	1875.94	1.97e-07	1.47e-06
dHC enriched	ENSRNOG00000017741	17	76387031	76410294	-	Nudt5	protein_coding	102.801	71.7929	0.698366	-0.517945	87.2971	0.012253	0.0389633
dHC enriched	ENSRNOG00000017420	2	124134307	124149636	-	Nudt6	protein_coding	54.9186	27.6086	0.502719	-0.992176	41.2636	0.00172727	0.00698216
dHC enriched	ENSRNOG00000009290	3	67870111	67896153	+	Nup35	protein_coding	173.745	117.51	0.676336	-0.564188	145.628	0.00037558	0.00174734
dHC enriched	ENSRNOG00000048733	1	100811755	100827111	+	Nup62	protein_coding	487.656	383.591	0.786602	-0.346294	435.624	0.00038014	0.00176667
dHC enriched	ENSRNOG00000018564	19	11159774	11263980	-	Nup93	protein_coding	247.096	183.406	0.742246	-0.43003	215.251	0.00187025	0.00747928
dHC enriched	ENSRNOG00000052129	16	18877257	18937562	-	Nwd1	protein_coding	367.996	235.679	0.640438	-0.642869	301.837	3.1e-08	2.53e-07
dHC enriched	ENSRNOG00000008178	10	64412833	64550145	-	Nxn	protein_coding	147.899	101.24	0.684522	-0.54683	124.569	0.00136921	0.00565165
dHC enriched	ENSRNOG00000001608	11	47188495	47238372	+	Nxpe3	protein_coding	430.807	213.54	0.495676	-1.01253	322.174	3.44e-18	5.94e-17
dHC enriched	ENSRNOG00000009243	8	47511719	47529689	-	Oaf	protein_coding	349.114	188.698	0.540505	-0.887619	268.906	3.41e-11	3.7e-10
dHC enriched	ENSRNOG00000009355	3	175930505	176099987	+	Ogfr	protein_coding	497.697	386.154	0.775881	-0.366092	441.926	0.00067692	0.00298308
dHC enriched	ENSRNOG00000009862	3	6773813	6798737	+	Olfm1	protein_coding	13428.8	10009.6	0.745385	-0.423942	11719.2	1.28e-13	1.66e-12
dHC enriched	ENSRNOG00000056562	1	171793782	171818068	+	Olfml1	protein_coding	308.052	151.386	0.491431	-1.02494	229.719	3.08e-12	3.6e-11
dHC enriched	ENSRNOG00000003018	13	88995316	89032487	+	Olfml2b	protein_coding	171.444	117.951	0.687984	-0.539553	144.697	0.00419447	0.0153206
dHC enriched	ENSRNOG00000019211	2	206219419	206222248	-	Olfml3	protein_coding	39.2511	14.5317	0.370223	-1.43353	26.8914	0.00015352	0.00076628
dHC enriched	ENSRNOG00000028648	11	31428358	31430517	+	Olig1	protein_coding	897.467	550.521	0.613417	-0.70506	723.994	8.62e-12	9.74e-11
dHC enriched	ENSRNOG00000028658	11	31389514	31392890	+	Olig2	protein_coding	262.912	130.004	0.494476	-1.01603	196.458	5.92e-11	6.24e-10
dHC enriched	ENSRNOG00000022244	10	45922873	45923829	-	Olr1462	protein_coding	154.482	5.21003	0.0337258	-4.89	79.8461	3.15e-40	1.43e-38
dHC enriched	ENSRNOG00000022386	1	260324028	260341723	-	Opalin	protein_coding	1265.53	800.139	0.632258	-0.661414	1032.83	0.0153464	0.0472834
dHC enriched	ENSRNOG00000011781	7	117353786	117369159	-	Oplah	protein_coding	335.932	240.013	0.71447	-0.485055	287.973	0.00020462	0.00100113
dHC enriched	ENSRNOG00000018191	1	43454803	43704948	+	Oprm1	protein_coding	36.7544	20.4094	0.555291	-0.848685	28.5819	0.0232739	0.0672152
dHC enriched	ENSRNOG00000001336	12	38981927	38995570	-	Orai1	protein_coding	98.4898	46.5044	0.472175	-1.08261	72.4971	5.81e-06	3.57e-05
dHC enriched	ENSRNOG00000001427	12	23544287	23564569	+	Orai2	protein_coding	1572.42	641.573	0.408016	-1.2933	1107	3.26e-55	2.31e-53
dHC enriched	ENSRNOG00000039730	1	199217016	199222851	+	Orai3	protein_coding	134.583	95.7304	0.711313	-0.491444	115.157	0.00561859	0.0198195
dHC enriched	ENSRNOG00000008314	5	50020815	50075454	-	Orc3	protein_coding	254.881	198.907	0.78039	-0.357732	226.894	0.00643511	0.0223063
dHC enriched	ENSRNOG00000030445	10	86547339	86554478	-	Ormdl3	protein_coding	579.292	416.132	0.718346	-0.477248	497.712	3.19e-07	2.32e-06
dHC enriched	ENSRNOG00000033593	5	128694803	128839433	-	Osbpl9	protein_coding	410.229	326.033	0.794757	-0.331413	368.131	0.00213444	0.00841062
dHC enriched	ENSRNOG00000009333	15	27842422	27849974	-	Osgep	protein_coding	150.98	94.8415	0.628172	-0.670768	122.911	0.00023426	0.00113243
dHC enriched	ENSRNOG00000012156	1	234749568	234796739	+	Ostf1	protein_coding	161.003	110.857	0.688544	-0.53838	135.93	0.00119124	0.00497315
dHC enriched	ENSRNOG00000053055	10	103891369	103898331	+	Otop3	protein_coding	18.3068	1.90897	0.104276	-3.26152	10.1079	8.73e-06	5.24e-05
dHC enriched	ENSRNOG00000009117	6	127282466	127301083	+	Otub2	protein_coding	241.1	123.846	0.513672	-0.961082	182.473	1.05e-10	1.08e-09
dHC enriched	ENSRNOG00000042068	2	198231291	198300201	+	Otud7b	protein_coding	560.823	386.356	0.688909	-0.537615	473.589	4e-07	2.88e-06
dHC enriched	ENSRNOG00000001873	11	87435185	87445219	+	P2rx6	protein_coding	56.2886	32.5445	0.578172	-0.790429	44.4165	0.00722508	0.0247159
dHC enriched	ENSRNOG00000014232	2	151314818	151320319	+	P2ry1	protein_coding	38.8336	10.238	0.263637	-1.92338	24.5358	2.37e-06	1.54e-05
dHC enriched	ENSRNOG00000013902	2	149441598	149444548	-	P2ry12	protein_coding	110.804	82.215	0.741985	-0.430537	96.5095	0.0286937	0.0800148
dHC enriched	ENSRNOG00000016071	4	157359332	157372861	-	P3h3	protein_coding	370.433	255.076	0.688588	-0.538287	312.754	0.00016739	0.00082947
dHC enriched	ENSRNOG00000008639	7	75409581	75422268	-	Pabpc1	protein_coding	1349.56	1029.94	0.76317	-0.389924	1189.75	4.04e-08	3.26e-07
dHC enriched	ENSRNOG00000014744	6	137824213	137887418	+	Pacs2	protein_coding	1538.05	1313.09	0.853739	-0.228132	1425.57	0.00271888	0.0104316
dHC enriched	ENSRNOG00000009756	7	124223633	124317379	-	Pacsin2	protein_coding	790.477	639.853	0.809453	-0.304981	715.165	0.00021204	0.00103434
dHC enriched	ENSRNOG00000007574	5	159428515	159471144	+	Padi2	protein_coding	904.115	472.24	0.522323	-0.936987	688.177	2.23e-23	5.06e-22
dHC enriched	ENSRNOG00000058580	2	52301798	52328205	+	Paip1	protein_coding	579.27	481.057	0.830453	-0.268029	530.163	0.00324226	0.0121975
dHC enriched	ENSRNOG00000019883	1	85192174	85201757	+	Pak4	protein_coding	106.419	70.3813	0.661359	-0.596495	88.4002	0.00293451	0.0111618
dHC enriched	ENSRNOG00000058609	2	220481616	220535751	-	Palmd	protein_coding	185.078	138.2	0.746711	-0.421377	161.639	0.00831232	0.0278915
dHC enriched	ENSRNOG00000007419	10	20591432	20615258	+	Pank3	protein_coding	1242.09	1058.35	0.852072	-0.230952	1150.22	0.00095152	0.00406209
dHC enriched	ENSRNOG00000055530	7	130042947	130053032	+	Panx2	protein_coding	1611.07	1249.89	0.775817	-0.366212	1430.48	3.33e-07	2.42e-06
dHC enriched	ENSRNOG00000009448	6	107245820	107276755	+	Papln	protein_coding	26.0492	3.90016	0.149723	-2.73963	14.9747	7.86e-07	5.45e-06
dHC enriched	ENSRNOG00000004827	6	129609074	129661531	+	Papola	protein_coding	1021.05	839.013	0.821716	-0.283289	930.032	0.00022057	0.00107167
dHC enriched	ENSRNOG00000033527	5	80920568	81150940	+	Pappa	protein_coding	29.7713	3.55557	0.11943	-3.06577	16.6634	1.67e-08	1.41e-07
dHC enriched	ENSRNOG00000011068	1	251145253	251230715	+	Papss2	protein_coding	100.186	59.1232	0.590136	-0.760881	79.6545	0.00059771	0.00266682
dHC enriched	ENSRNOG00000003721	10	13070146	13075864	-	Paqr4	protein_coding	296.179	192.101	0.648598	-0.624604	244.14	4.66e-06	2.9e-05
dHC enriched	ENSRNOG00000026059	2	187737770	187741696	+	Paqr6	protein_coding	207.043	102.542	0.495269	-1.01372	154.793	1.87e-10	1.89e-09
dHC enriched	ENSRNOG00000012830	9	27034022	27051002	+	Paqr8	protein_coding	538.086	348.883	0.648379	-0.625092	443.485	1.15e-08	9.91e-08
dHC enriched	ENSRNOG00000032437	19	60017746	60580651	+	Pard3	protein_coding	292.767	98.2385	0.335552	-1.57539	195.503	5.67e-26	1.47e-24
dHC enriched	ENSRNOG00000008196	4	66849554	66899914	-	Parp12	protein_coding	49.4191	25.3335	0.512627	-0.964019	37.3763	0.00264233	0.0101719
dHC enriched	ENSRNOG00000015713	1	177249226	177408205	+	Parva	protein_coding	254.106	183.388	0.721701	-0.470526	218.747	0.00033176	0.00156081
dHC enriched	ENSRNOG00000004410	3	95707386	95728624	+	Pax6	protein_coding	70.4839	40.4369	0.573704	-0.801621	55.4604	0.00152005	0.00623238
dHC enriched	ENSRNOG00000002036	11	31185473	31213787	-	Paxbp1	protein_coding	426.91	330.8	0.774871	-0.367971	378.855	0.00085071	0.00367536
dHC enriched	ENSRNOG00000020673	2	188766535	188776439	+	Pbxip1	protein_coding	607.535	383.474	0.631196	-0.66384	495.505	5.53e-11	5.85e-10
dHC enriched	ENSRNOG00000019372	1	219759183	219859848	+	Pc	protein_coding	1296.48	1066.16	0.822351	-0.282174	1181.32	9.56e-05	0.00049363
dHC enriched	ENSRNOG00000057042	15	108960562	109306603	+	Pcca	protein_coding	221.216	170.376	0.77018	-0.376732	195.796	0.00795261	0.0268627
dHC enriched	ENSRNOG00000060410	18	31328919	31343797	-	Pcdh1	protein_coding	3442.64	1815.05	0.527227	-0.923505	2628.84	3.79e-44	1.99e-42
dHC enriched	ENSRNOG00000003929	X	104391607	104493757	-	Pcdh19	protein_coding	545.98	386.615	0.708112	-0.497951	466.297	2.97e-06	1.9e-05
dHC enriched	ENSRNOG00000013306	15	71772777	71779033	-	Pcdh20	protein_coding	1087.56	460.817	0.423719	-1.23882	774.187	2.7e-46	1.51e-44
dHC enriched	ENSRNOG00000013101	15	62197060	62200837	-	Pcdh8	protein_coding	1089.37	814.118	0.747331	-0.420181	951.743	8.07e-08	6.3e-07
dHC enriched	ENSRNOG00000039469	18	30574627	30577035	+	Pcdhb19	protein_coding	134.505	87.3799	0.649639	-0.62229	110.943	0.00053225	0.0024003
dHC enriched	ENSRNOG00000033479	18	30587872	30590789	+	Pcdhb21	protein_coding	30.5843	15.4323	0.504583	-0.986837	23.0083	0.0187424	0.0560448
dHC enriched	ENSRNOG00000020028	18	30592794	30595181	+	Pcdhb22	protein_coding	99.7338	50.994	0.511301	-0.967754	75.3639	3.44e-05	0.0001902
dHC enriched	ENSRNOG00000039463	18	30808404	30810824	+	Pcdhga1	protein_coding	49.2896	26.2342	0.532245	-0.909836	37.7619	0.00376463	0.0139371
dHC enriched	ENSRNOG00000034126	18	30815127	30818320	+	Pcdhga2	protein_coding	226.671	176.336	0.777938	-0.362273	201.504	0.0127269	0.0402321
dHC enriched	ENSRNOG00000039461	18	30820321	30822735	+	Pcdhga3	protein_coding	86.0644	56.9245	0.661418	-0.596366	71.4945	0.00876707	0.029184
dHC enriched	ENSRNOG00000042322	18	30831365	30833782	+	Pcdhga4	protein_coding	108.938	68.3392	0.627322	-0.672722	88.6385	0.00199847	0.00794952
dHC enriched	ENSRNOG00000027299	18	30840868	30843291	+	Pcdhga5	protein_coding	48.2605	28.6953	0.594591	-0.750029	38.4779	0.017018	0.0516102
dHC enriched	ENSRNOG00000027296	18	30856847	30859261	+	Pcdhga6	protein_coding	180.343	138.609	0.768583	-0.379726	159.476	0.0140943	0.0439888
dHC enriched	ENSRNOG00000027290	18	30864216	30866645	+	Pcdhga7	protein_coding	247.448	175.664	0.709906	-0.4943	211.556	0.00070517	0.00309334
dHC enriched	ENSRNOG00000027277	18	30875011	30877434	+	Pcdhga8	protein_coding	97.8025	70.0602	0.716343	-0.481277	83.9313	0.0210393	0.0616065
dHC enriched	ENSRNOG00000039459	18	30869628	30872006	+	Pcdhgb4	protein_coding	53.8057	33.0399	0.614058	-0.703552	43.4228	0.012492	0.0396352
dHC enriched	ENSRNOG00000039457	18	30880020	30882416	+	Pcdhgb5	protein_coding	118.844	80.9618	0.681247	-0.553751	99.9027	0.0038645	0.0142546
dHC enriched	ENSRNOG00000039455	18	30890869	30893286	+	Pcdhgb6	protein_coding	85.6637	55.8711	0.652215	-0.61658	70.7674	0.00679738	0.0234064
dHC enriched	ENSRNOG00000039454	18	30900291	30902711	+	Pcdhgb7	protein_coding	162.478	84.59	0.520623	-0.94169	123.534	3.02e-07	2.21e-06
dHC enriched	ENSRNOG00000019799	18	30913842	30969361	+	Pcdhgc3	protein_coding	2288.81	1422.04	0.6213	-0.686638	1855.43	6.05e-25	1.49e-23
dHC enriched	ENSRNOG00000019799	18	30913842	30969361	+	Pcdhgc3	protein_coding	2288.81	1422.04	0.6213	-0.686638	1855.43	6.05e-25	1.49e-23
dHC enriched	ENSRNOG00000005730	5	12132657	12199283	-	Pcmtd1	protein_coding	1100.17	818.9	0.744341	-0.425964	959.533	3.09e-07	2.26e-06
dHC enriched	ENSRNOG00000011526	1	126749508	126947392	+	Pcsk6	protein_coding	352.387	208.289	0.591081	-0.758572	280.338	4.52e-10	4.43e-09
dHC enriched	ENSRNOG00000014485	1	31576183	31591849	+	Pdcd6	protein_coding	408.837	338.669	0.828371	-0.271651	373.753	0.0113123	0.0363754
dHC enriched	ENSRNOG00000011310	1	52360296	52544450	-	Pde10a	protein_coding	539.292	460.162	0.85327	-0.228927	499.727	0.01865	0.0558169
dHC enriched	ENSRNOG00000025042	4	175431904	175700238	+	Pde3a	protein_coding	66.9641	43.9651	0.656547	-0.60703	55.4646	0.0173785	0.0525604
dHC enriched	ENSRNOG00000014443	2	226900619	227041576	+	Pde5a	protein_coding	105.328	69.7802	0.662506	-0.593995	87.5539	0.00389407	0.0143545
dHC enriched	ENSRNOG00000013436	1	15893533	16203909	-	Pde7b	protein_coding	124.874	81.0401	0.648976	-0.623764	102.957	0.00132643	0.00548165
dHC enriched	ENSRNOG00000019005	1	143036218	143159433	+	Pde8a	protein_coding	145.08	77.9486	0.537282	-0.89625	111.514	1.96e-06	1.29e-05
dHC enriched	ENSRNOG00000002244	14	35527927	35581031	-	Pdgfra	protein_coding	814.828	576.307	0.707275	-0.499658	695.568	2.16e-09	2e-08
dHC enriched	ENSRNOG00000018461	18	56364620	56406381	+	Pdgfrb	protein_coding	305.923	190.842	0.623824	-0.680788	248.382	1.15e-07	8.87e-07
dHC enriched	ENSRNOG00000015018	3	113376983	113400707	+	Pdia3	protein_coding	2293.76	1915.27	0.834991	-0.260168	2104.51	1.77e-05	0.00010213
dHC enriched	ENSRNOG00000004172	10	82839153	82852660	-	Pdk2	protein_coding	1088.18	883.581	0.811982	-0.30048	985.88	3.98e-05	0.00021904
dHC enriched	ENSRNOG00000012658	16	49543142	49574390	-	Pdlim3	protein_coding	42.531	17.0613	0.401151	-1.31778	29.7961	0.00051186	0.00231804
dHC enriched	ENSRNOG00000050794	10	39390581	39405311	-	Pdlim4	protein_coding	270.984	205.282	0.757542	-0.400603	238.133	0.00324957	0.0122223
dHC enriched	ENSRNOG00000016419	2	247818243	247988462	-	Pdlim5	protein_coding	163.772	87.7676	0.535913	-0.899931	125.77	5.03e-07	3.57e-06
dHC enriched	ENSRNOG00000014961	5	161947137	161981441	-	Pdpn	protein_coding	202.025	111.368	0.55126	-0.859195	156.696	3.49e-07	2.53e-06
dHC enriched	ENSRNOG00000002541	14	44185446	44280079	+	Pds5a	protein_coding	531.085	420.073	0.790972	-0.338302	475.579	0.00053968	0.00242871
dHC enriched	ENSRNOG00000026036	3	122194329	122206671	-	Pdyn	protein_coding	605.099	303.42	0.501439	-0.995853	454.26	1.35e-18	2.38e-17
dHC enriched	ENSRNOG00000042519	8	60867819	61079526	-	Peak1	protein_coding	478.933	369.32	0.771131	-0.374953	424.127	0.00015904	0.00079152
dHC enriched	ENSRNOG00000001136	12	45026886	45031145	+	Pebp1	protein_coding	4257.77	3882.2	0.911792	-0.133224	4069.98	0.0277697	0.0779437
dHC enriched	ENSRNOG00000006329	14	106008086	106061641	+	Peli1	protein_coding	268.939	182.629	0.679072	-0.558364	225.784	2.59e-05	0.00014581
dHC enriched	ENSRNOG00000012363	15	24942218	25083931	+	Peli2	protein_coding	90.8593	41.4727	0.456449	-1.13147	66.166	3.21e-06	2.04e-05
dHC enriched	ENSRNOG00000011994	1	14224393	14236846	+	Perp	protein_coding	126.204	22.6551	0.179511	-2.47785	74.4295	6.16e-23	1.38e-21
dHC enriched	ENSRNOG00000057116	13	90514336	90530349	+	Pex19	protein_coding	149.253	105.682	0.708074	-0.498027	127.468	0.00371199	0.0137599
dHC enriched	ENSRNOG00000018911	17	70684134	70713726	+	Pfkfb3	protein_coding	732.079	544.871	0.744279	-0.426084	638.475	2.14e-06	1.4e-05
dHC enriched	ENSRNOG00000003975	10	57273005	57275708	-	Pfn1	protein_coding	1472.41	866.864	0.588738	-0.764302	1169.64	1.43e-25	3.62e-24
dHC enriched	ENSRNOG00000013532	14	86044969	86047162	-	Pgam2	protein_coding	81.7331	51.6421	0.631838	-0.662373	66.6876	0.00392729	0.0144511
dHC enriched	ENSRNOG00000026791	19	57127054	57192095	-	Pgbd5	protein_coding	1409.53	1062.16	0.753557	-0.408212	1235.84	1.08e-08	9.32e-08
dHC enriched	ENSRNOG00000009889	5	118743632	118803055	+	Pgm1	protein_coding	654.087	557.862	0.852887	-0.229574	605.974	0.0103594	0.0337148
dHC enriched	ENSRNOG00000015406	1	242582642	242765807	-	Pgm5	protein_coding	76.4506	14.8488	0.194228	-2.36418	45.6497	1.24e-13	1.61e-12
dHC enriched	ENSRNOG00000015473	1	7355154	7480825	-	Phactr2	protein_coding	34.1087	15.5263	0.4552	-1.13543	24.8175	0.00377292	0.0139557
dHC enriched	ENSRNOG00000006004	5	146882756	146931444	+	Phc2	protein_coding	809.083	522.116	0.645318	-0.631917	665.599	2.29e-12	2.71e-11
dHC enriched	ENSRNOG00000046527	7	108613739	108756740	+	Phf20l1	protein_coding	429.935	309.468	0.719803	-0.474325	369.702	1.21e-05	7.09e-05
dHC enriched	ENSRNOG00000017657	10	56605140	56609233	+	Phf23	protein_coding	323.819	264.429	0.816595	-0.292307	294.124	0.0155747	0.0478923
dHC enriched	ENSRNOG00000019328	2	200484246	200513564	-	Phgdh	protein_coding	1069.2	616.34	0.576451	-0.794729	842.769	3.3e-18	5.7e-17
dHC enriched	ENSRNOG00000003063	X	72377021	72515366	-	Phka1	protein_coding	495.443	248.936	0.502451	-0.992946	372.189	5.92e-21	1.19e-19
dHC enriched	ENSRNOG00000000920	12	30450310	30464373	+	Phkg1	protein_coding	25.5374	6.52965	0.255689	-1.96754	16.0335	7.12e-05	0.00037669
dHC enriched	ENSRNOG00000018725	1	199019289	199032052	+	Phkg2	protein_coding	489.902	397.589	0.811567	-0.301218	443.745	0.00289196	0.011017
dHC enriched	ENSRNOG00000026985	8	48997184	49045154	-	Phldb1	protein_coding	1114.7	938.079	0.841555	-0.248871	1026.39	0.0121461	0.0386662
dHC enriched	ENSRNOG00000002821	13	26172243	26394505	+	Phlpp1	protein_coding	1573.13	1088.55	0.691965	-0.53123	1330.84	6.61e-13	8.11e-12
dHC enriched	ENSRNOG00000018044	17	77287188	77304530	-	Phyh	protein_coding	566.445	434.857	0.767695	-0.381394	500.651	6.93e-05	0.00036731
dHC enriched	ENSRNOG00000016794	3	8832740	8846125	+	Phyhd1	protein_coding	195.633	114.178	0.583632	-0.776868	154.906	6.17e-07	4.35e-06
dHC enriched	ENSRNOG00000014675	1	261337594	261362509	+	Pi4k2a	protein_coding	507.711	430.321	0.847571	-0.238594	469.016	0.0135475	0.0424749
dHC enriched	ENSRNOG00000038784	18	58354648	58499836	-	Piezo2	protein_coding	199.359	23.0408	0.115574	-3.11311	111.2	2.89e-42	1.41e-40
dHC enriched	ENSRNOG00000010914	6	102263337	102272777	-	Pigh	protein_coding	187.434	148.757	0.793649	-0.333427	168.095	0.0297683	0.0825563
dHC enriched	ENSRNOG00000039850	11	34592121	34598275	-	Pigp	protein_coding	128.454	97.9468	0.762504	-0.391183	113.2	0.0297448	0.0825428
dHC enriched	ENSRNOG00000020140	10	15289536	15305549	-	Pigq	protein_coding	1127.98	1016.86	0.901485	-0.149625	1072.42	0.0368572	0.0987912
dHC enriched	ENSRNOG00000052134	8	23167974	23170209	+	Pigy	protein_coding	143.317	112.527	0.785165	-0.348932	127.922	0.0362444	0.0973612
dHC enriched	ENSRNOG00000020479	1	185210922	185326314	+	Pik3c2a	protein_coding	424.697	328.427	0.773321	-0.370861	376.562	0.0032874	0.0123484
dHC enriched	ENSRNOG00000029938	13	49850189	49911202	+	Pik3c2b	protein_coding	455.048	316.803	0.696196	-0.522434	385.926	2.58e-06	1.66e-05
dHC enriched	ENSRNOG00000015232	1	242168462	242441247	-	Pip5k1b	protein_coding	443.438	205.74	0.463965	-1.10791	324.589	9.08e-22	1.91e-20
dHC enriched	ENSRNOG00000029260	12	37805332	37903855	+	Pitpnm2	protein_coding	4375.72	3218.89	0.735625	-0.442957	3797.3	4.56e-11	4.87e-10
dHC enriched	ENSRNOG00000009871	15	52037693	52116001	-	Piwil2	protein_coding	61.4891	34.5749	0.562292	-0.830607	48.032	0.00210405	0.00831182
dHC enriched	ENSRNOG00000052310	19	41989650	42054018	-	Pkd1l3	protein_coding	39.3293	18.2067	0.462928	-1.11114	28.768	0.00193357	0.00771277
dHC enriched	ENSRNOG00000002146	14	6602004	6645257	-	Pkd2	protein_coding	359.721	247.784	0.688824	-0.537793	303.753	5.2e-06	3.21e-05
dHC enriched	ENSRNOG00000000811	20	40618128	40712592	+	Pkib	protein_coding	28.9723	15.6673	0.540767	-0.886922	22.3198	0.0257242	0.0729164
dHC enriched	ENSRNOG00000001825	11	88912599	88972176	-	Pkp2	protein_coding	290.73	35.1564	0.120925	-3.04782	162.943	1.16e-51	7.58e-50
dHC enriched	ENSRNOG00000005504	3	45277348	45414613	+	Pkp4	protein_coding	3596.39	2521.49	0.701118	-0.512271	3058.94	3.41e-15	4.85e-14
dHC enriched	ENSRNOG00000057153	11	64882288	64919579	+	Pla1a	protein_coding	22.974	10.7764	0.469068	-1.09213	16.8752	0.0183657	0.0551097
dHC enriched	ENSRNOG00000021206	1	222844144	222877193	+	Pla2g16	protein_coding	394.76	228.174	0.578005	-0.790845	311.467	2.03e-09	1.89e-08
dHC enriched	ENSRNOG00000002657	13	66988937	67206693	-	Pla2g4a	protein_coding	44.3363	22.1323	0.499192	-1.00233	33.2343	0.00321288	0.0120949
dHC enriched	ENSRNOG00000012295	7	120519467	120559347	-	Pla2g6	protein_coding	478.678	350.827	0.732909	-0.448295	414.753	1.27e-05	7.43e-05
dHC enriched	ENSRNOG00000025691	9	19935768	19978013	-	Pla2g7	protein_coding	511.973	199.753	0.390162	-1.35785	355.863	2.65e-26	7.08e-25
dHC enriched	ENSRNOG00000008846	5	16791523	16799776	-	Plag1	protein_coding	116.198	87.6756	0.754537	-0.406337	101.937	0.0316898	0.0870014
dHC enriched	ENSRNOG00000019018	16	74098260	74122889	-	Plat	protein_coding	346.224	232.084	0.670328	-0.57706	289.154	1.09e-06	7.37e-06
dHC enriched	ENSRNOG00000001385	12	41600005	41619186	+	Plbd2	protein_coding	922.912	665.293	0.720862	-0.472205	794.102	4.07e-09	3.66e-08
dHC enriched	ENSRNOG00000021150	1	222209575	222224910	-	Plcb3	protein_coding	155.286	80.069	0.515624	-0.955607	117.677	7.25e-08	5.7e-07
dHC enriched	ENSRNOG00000032238	8	127753539	127782070	-	Plcd1	protein_coding	200.339	152.812	0.762766	-0.390688	176.575	0.00872626	0.0290706
dHC enriched	ENSRNOG00000016361	9	81816872	81844364	+	Plcd4	protein_coding	179.654	92.678	0.515869	-0.954923	136.166	2.61e-08	2.15e-07
dHC enriched	ENSRNOG00000014276	1	257157264	257466064	+	Plce1	protein_coding	104.473	47.272	0.452482	-1.14407	75.8723	1.09e-06	7.37e-06
dHC enriched	ENSRNOG00000014226	5	172388598	172424081	-	Plch2	protein_coding	586.228	456.686	0.779025	-0.360259	521.457	0.00011529	0.00058753
dHC enriched	ENSRNOG00000042289	11	57207656	57260568	+	Plcxd2	protein_coding	2474.43	1522.81	0.615419	-0.700359	1998.62	1.31e-17	2.16e-16
dHC enriched	ENSRNOG00000028156	2	113652348	113849403	+	Pld1	protein_coding	178.903	140.5	0.785343	-0.348605	159.702	0.0251494	0.0716174
dHC enriched	ENSRNOG00000019604	10	57163174	57179730	+	Pld2	protein_coding	331.068	149.755	0.45234	-1.14452	240.412	1.32e-17	2.17e-16
dHC enriched	ENSRNOG00000038365	16	71738718	71787787	+	Plekha2	protein_coding	578.728	267.052	0.461447	-1.11576	422.89	4.32e-25	1.07e-23
dHC enriched	ENSRNOG00000011830	3	63536166	63557361	+	Plekha3	protein_coding	311.523	263.254	0.845055	-0.242884	287.388	0.0346488	0.0938361
dHC enriched	ENSRNOG00000018627	1	165665909	165680206	-	Plekhb1	protein_coding	2371.18	1351.52	0.569977	-0.811024	1861.35	1.29e-22	2.86e-21
dHC enriched	ENSRNOG00000038297	6	104340206	104371335	+	Plekhd1	protein_coding	202.978	151.102	0.744428	-0.425796	177.04	0.00509302	0.0182082
dHC enriched	ENSRNOG00000027724	1	94609377	94610854	-	Plekhf1	protein_coding	65.8947	21.1671	0.321225	-1.63834	43.5309	6.13e-08	4.86e-07
dHC enriched	ENSRNOG00000026662	5	24240242	24255606	-	Plekhf2	protein_coding	126.37	82.0799	0.649521	-0.622552	104.225	0.00117539	0.00491414
dHC enriched	ENSRNOG00000016011	1	40389638	40520447	+	Plekhg1	protein_coding	557.033	130.985	0.235147	-2.08836	344.009	2.54e-50	1.6e-48
dHC enriched	ENSRNOG00000006570	6	99625306	99655362	+	Plekhg3	protein_coding	803.104	509.795	0.63478	-0.655671	656.449	5.42e-11	5.73e-10
dHC enriched	ENSRNOG00000022694	5	169244778	169288309	+	Plekhg5	protein_coding	1734.67	770.453	0.444148	-1.17089	1252.56	1.88e-58	1.45e-56
dHC enriched	ENSRNOG00000005124	6	7793735	7893769	+	Plekhh2	protein_coding	500.795	414.067	0.826818	-0.274358	457.431	0.023915	0.0687052
dHC enriched	ENSRNOG00000020295	5	173646195	173653905	-	Plekhn1	protein_coding	106.153	68.86	0.648684	-0.624411	87.5067	0.00276875	0.010604
dHC enriched	ENSRNOG00000048834	9	10773901	10781109	+	Plin3	protein_coding	24.8587	10.0891	0.405859	-1.30095	17.4739	0.00411121	0.0150517
dHC enriched	ENSRNOG00000034102	7	12212911	12221330	-	Plk5	protein_coding	274.765	34.2812	0.124765	-3.00271	154.523	1.04e-53	7.08e-52
dHC enriched	ENSRNOG00000016558	19	10731855	10752641	+	Pllp	protein_coding	732.65	398.009	0.543246	-0.880323	565.33	4.73e-16	7.12e-15
dHC enriched	ENSRNOG00000007763	5	164720587	164747083	-	Plod1	protein_coding	318.455	166.631	0.523248	-0.934434	242.543	1.8e-13	2.31e-12
dHC enriched	ENSRNOG00000002419	X	107496072	107511348	+	Plp1	protein_coding	26029.2	13219.9	0.507885	-0.977425	19624.6	0.00040531	0.00187001
dHC enriched	ENSRNOG00000008048	8	99625545	99725217	+	Plscr2	protein_coding	32.413	15.3442	0.473397	-1.07888	23.8786	0.00544692	0.019301
dHC enriched	ENSRNOG00000008151	8	99880073	99918825	+	Plscr4	protein_coding	43.2821	23.0173	0.531797	-0.911052	33.1497	0.0149018	0.0461822
dHC enriched	ENSRNOG00000016488	3	161304469	161322289	-	Pltp	protein_coding	771.076	574.353	0.744872	-0.424935	672.715	1.61e-06	1.07e-05
dHC enriched	ENSRNOG00000021536	10	85871122	85938085	-	Plxdc1	protein_coding	209.19	88.7583	0.424296	-1.23686	148.974	4.23e-13	5.25e-12
dHC enriched	ENSRNOG00000013072	4	59445767	59809321	-	Plxna4	protein_coding	1792.88	849.404	0.473766	-1.07775	1321.14	6.86e-50	4.31e-48
dHC enriched	ENSRNOG00000029510	8	117836701	117856689	+	Plxnb1	protein_coding	1334.34	792.785	0.594139	-0.751127	1063.56	1.3e-24	3.13e-23
dHC enriched	ENSRNOG00000061731	X	157015305	157028434	-	Plxnb3	protein_coding	430.575	220.916	0.513071	-0.962769	325.745	3.11e-13	3.91e-12
dHC enriched	ENSRNOG00000007755	5	48420302	48436531	-	Pm20d2	protein_coding	70.1608	37.0986	0.528765	-0.919302	53.6297	0.00089606	0.00385114
dHC enriched	ENSRNOG00000023085	7	3133506	3143911	+	Pmel	protein_coding	65.7534	33.034	0.502392	-0.993116	49.3937	0.00025712	0.00123466
dHC enriched	ENSRNOG00000002615	10	7056266	7077443	-	Pmm2	protein_coding	305.703	256.785	0.839983	-0.251568	281.244	0.0319492	0.0875879
dHC enriched	ENSRNOG00000003338	10	49538588	49568583	+	Pmp22	protein_coding	344.331	170.307	0.494604	-1.01565	257.319	4.23e-11	4.53e-10
dHC enriched	ENSRNOG00000012693	4	9908831	9921610	-	Pmpcb	protein_coding	715.803	606.308	0.847033	-0.23951	661.056	0.00428903	0.0156262
dHC enriched	ENSRNOG00000014806	9	81566074	81634534	+	Pnkd	protein_coding	2040.21	1485.52	0.728121	-0.45775	1762.86	1.75e-10	1.77e-09
dHC enriched	ENSRNOG00000005524	14	100364190	100372760	-	Pno1	protein_coding	174.389	125.324	0.71865	-0.476638	149.856	0.00438698	0.0159527
dHC enriched	ENSRNOG00000014231	15	48805228	48833285	-	Pnoc	protein_coding	93.9288	47.2308	0.502836	-0.99184	70.5798	1.8e-05	0.00010346
dHC enriched	ENSRNOG00000009982	15	27875911	27883350	+	Pnp	protein_coding	806.507	449.424	0.557248	-0.84361	627.966	1.72e-18	3.03e-17
dHC enriched	ENSRNOG00000008190	3	2182957	2261878	+	Pnpla7	protein_coding	196.631	143.024	0.727371	-0.459237	169.828	0.00315333	0.0119046
dHC enriched	ENSRNOG00000009248	5	154218852	154223536	-	Pnrc2	protein_coding	375.052	304.137	0.810921	-0.302366	339.594	0.00662157	0.0228743
dHC enriched	ENSRNOG00000012495	4	58829060	58893170	-	Podxl	protein_coding	310.406	226.4	0.729368	-0.455281	268.403	0.00017055	0.00084441
dHC enriched	ENSRNOG00000013322	X	62382608	62698830	-	Pola1	protein_coding	81.4252	50.2186	0.616745	-0.697254	65.8219	0.00406579	0.0149172
dHC enriched	ENSRNOG00000013647	14	86069016	86078954	-	Polm	protein_coding	118.683	63.742	0.537079	-0.896795	91.2124	8.38e-06	5.05e-05
dHC enriched	ENSRNOG00000011214	7	120380544	120390954	+	Polr2f	protein_coding	342.337	283.939	0.829413	-0.269838	313.138	0.028387	0.0793514
[truncated: 31,706 more rows]
