# Supplementary material
Source: HighWire-hosted journal article supplement (https://www.jneurosci.org/content/41/12/2601)
Supplement: inline-supplementary-material-8 [file inline-supplementary-material-8.xlsx]

## Sheet: Figure 3-2
Figure 3-2: List of differentially expressed genes at 1 hour after inhibitory avoidance training in the PL cortex
DESeq2 results in PL cortex 1 hour after inhibitory avoidance training
Selected statistical parameter: Benjamini & Hochberg False Discovery Rate (FDR) corrected p-value
Selected significance level: 0.10
All DEGs exceeded lower bound for expression (10.0 baseMean read count averaged across all biological replicates in dHC and PL cortex in baseline conditions)
Gene ID	Chromosome	Location Start	Location End	Strand	GeneSymbol	BioType	PL Untrained Avg	PL 1hr Avg	foldChange	log2FoldChange	p-value	FDR
ENSRNOG00000043465	7	115907097	115910541	-	Arc	protein_coding	406.69	1711.14	4.20749	2.07296	1.97e-128	2.11e-124
ENSRNOG00000000640	20	22454463	22459025	-	Egr2	protein_coding	30.5796	410.196	13.4141	3.74567	1.98e-107	1.06e-103
ENSRNOG00000042838	19	26092974	26094756	-	Junb	protein_coding	357.411	1125.28	3.14841	1.65462	7.68e-80	2.75e-76
ENSRNOG00000007607	7	142905758	142920216	+	Nr4a1	protein_coding	606.217	1343.84	2.21677	1.14846	7.79e-55	2.09e-51
ENSRNOG00000046667	1	80214494	80221710	-	Fosb	protein_coding	84.4512	397.279	4.70424	2.23396	3.58e-54	7.7e-51
ENSRNOG00000019422	18	27657628	27661429	+	Egr1	protein_coding	1350.74	3111.37	2.30346	1.2038	4.96e-54	8.88e-51
ENSRNOG00000015719	4	117293620	117296082	-	Egr4	protein_coding	225.696	735.616	3.25932	1.70457	1.44e-41	2.21e-38
ENSRNOG00000003977	10	16970626	16973418	+	Dusp1	protein_coding	263.991	656.842	2.48812	1.31506	4.24e-41	5.7e-38
ENSRNOG00000017828	15	51756736	51760715	+	Egr3	protein_coding	680.376	1221.36	1.79512	0.84408	3.91e-26	4.67e-23
ENSRNOG00000007387	10	55687050	55695994	+	Per1	protein_coding	629.062	1179.73	1.87538	0.907182	2.51e-23	2.69e-20
ENSRNOG00000008015	6	109300433	109303299	+	Fos	protein_coding	59.8386	496.436	8.29625	3.05246	8.63e-21	8.43e-18
ENSRNOG00000006118	7	77156006	77162148	-	Klf10	protein_coding	334.83	680.617	2.03272	1.02341	1.28e-20	1.14e-17
ENSRNOG00000005964	5	63781801	63821637	+	Nr4a3	protein_coding	412.232	784.627	1.90336	0.928548	4.82e-20	3.98e-17
ENSRNOG00000029886	10	15602794	15603649	-	Hba-a3	protein_coding	579.429	1084.55	1.87176	0.904399	5.23e-20	4.01e-17
ENSRNOG00000019018	16	74098260	74122889	-	Plat	protein_coding	235.107	462.325	1.96645	0.975591	6.41e-20	4.59e-17
ENSRNOG00000059406	13	72742211	72744303	-	Ier5	protein_coding	420.63	701.513	1.66777	0.737919	5.62e-17	3.78e-14
ENSRNOG00000047321	10	15589364	15590220	-	Hba-a2	protein_coding	221.716	443.245	1.99916	0.999391	1.42e-16	8.98e-14
ENSRNOG00000005600	3	43111240	43119159	-	Nr4a2	protein_coding	90.2682	225.177	2.49454	1.31877	3e-16	1.79e-13
ENSRNOG00000023896	7	41475163	41479392	+	Dusp6	protein_coding	285.881	497.219	1.73925	0.798467	8.83e-15	4.99e-12
ENSRNOG00000007152	4	140703619	140709319	+	Bhlhe40	protein_coding	1233.31	1810.35	1.46787	0.553729	1.33e-14	7.14e-12
ENSRNOG00000023509	16	83824430	83848684	+	Irs2	protein_coding	726.833	1140.25	1.56879	0.649648	1.99e-14	1.02e-11
ENSRNOG00000002525	13	67351087	67359335	+	Ptgs2	protein_coding	323.012	524.4	1.62347	0.69908	4.14e-12	2.02e-09
ENSRNOG00000020770	10	89578212	89580368	+	Arl4d	protein_coding	171.755	305.047	1.77606	0.828682	2.44e-10	1.14e-07
ENSRNOG00000018642	1	73722088	73733788	-	Leng8	protein_coding	1749.96	1182.09	0.6755	-0.565973	2.86e-10	1.28e-07
ENSRNOG00000018294	3	13838304	13842762	+	Hspa5	protein_coding	2186.98	2795.59	1.27829	0.354216	1.06e-09	4.57e-07
ENSRNOG00000059605	7	140479711	140483693	-	Ddn	protein_coding	10711.9	12808.3	1.1957	0.257861	2.79e-09	1.15e-06
ENSRNOG00000058105	1	168971274	168972725	-	Hbb	protein_coding	341.532	555.879	1.6276	0.70275	3.28e-09	1.3e-06
ENSRNOG00000011585	8	14417584	14880644	-	Fat3	protein_coding	1230.91	850.523	0.690969	-0.533307	4.89e-09	1.81e-06
ENSRNOG00000011238	2	157316266	157341469	+	Tiparp	protein_coding	50.3051	120.492	2.39522	1.26016	4.71e-09	1.81e-06
ENSRNOG00000047466	3	100768637	100819210	+	Bdnf	protein_coding	249.022	410.006	1.64646	0.71937	1.08e-08	3.88e-06
ENSRNOG00000057078	20	29509289	29511382	-	Ddit4	protein_coding	261.301	405.597	1.55222	0.634335	4.27e-08	1.48e-05
ENSRNOG00000024363	1	84293102	84296367	+	Sertad1	protein_coding	68.6034	139.681	2.03607	1.02578	6.65e-08	2.23e-05
ENSRNOG00000024846	3	9036373	9037942	-	Ier5l	protein_coding	110.64	202.056	1.82624	0.868878	7.25e-08	2.36e-05
ENSRNOG00000023972	16	83387364	83438561	-	Col4a2	protein_coding	417.311	274.211	0.657091	-0.605836	7.83e-08	2.47e-05
ENSRNOG00000014268	3	2648885	2668809	+	Abca2	protein_coding	3926.01	3069.38	0.781806	-0.355117	1.22e-07	3.73e-05
ENSRNOG00000030515	13	49335408	49522415	-	Nfasc	protein_coding	3636	2806.84	0.77196	-0.373402	1.26e-07	3.75e-05
ENSRNOG00000061299	1	168957460	168958836	+	LOC100134871	protein_coding	193.258	310.005	1.6041	0.681766	1.34e-07	3.9e-05
ENSRNOG00000061299	1	168957460	168958836	+	LOC100134871	protein_coding	193.258	310.005	1.6041	0.681766	1.34e-07	3.9e-05
ENSRNOG00000024114	9	70059683	70089778	+	Zdbf2	protein_coding	305.501	467.672	1.53084	0.614321	2.2e-07	6.23e-05
ENSRNOG00000001189	20	10668411	10680283	-	Sik1	protein_coding	52.3595	116.735	2.22948	1.15671	3.49e-07	9.6e-05
ENSRNOG00000029336	1	80920747	80940040	+	Zfp180	protein_coding	1345.5	1714.38	1.27416	0.349542	4.65e-07	0.000124952
ENSRNOG00000052687	1	82185034	82234045	+	Megf8	protein_coding	3080.61	2439.33	0.791832	-0.336733	5.37e-07	0.000137496
ENSRNOG00000006570	6	99625306	99655362	+	Plekhg3	protein_coding	516.397	355.538	0.688498	-0.538476	5.37e-07	0.000137496
ENSRNOG00000008415	7	70961575	70969905	-	Nab2	protein_coding	312.341	445.564	1.42653	0.51251	5.85e-07	0.000146074
ENSRNOG00000013874	8	66862143	66863476	-	LOC100360522	protein_coding	2155.99	2685.41	1.24556	0.316791	7.01e-07	0.000171206
ENSRNOG00000013874	8	66862143	66863476	-	LOC100360522	protein_coding	2155.99	2685.41	1.24556	0.316791	7.01e-07	0.000171206
ENSRNOG00000013874	8	66862143	66863476	-	LOC100360522	protein_coding	2155.99	2685.41	1.24556	0.316791	7.01e-07	0.000171206
ENSRNOG00000029535	7	117145961	117151694	-	Nrbp2	protein_coding	1094.81	850.12	0.776501	-0.364941	9e-07	0.000214843
ENSRNOG00000016256	16	19669411	19754069	+	Myo9b	protein_coding	638.738	479.826	0.75121	-0.412711	1.65e-06	0.000377427
ENSRNOG00000004196	6	91455333	91456696	-	Rps29	protein_coding	2376.77	2903.85	1.22176	0.288966	1.65e-06	0.000377427
ENSRNOG00000006178	6	134958854	135085769	+	Dync1h1	protein_coding	8928.95	7122.87	0.797727	-0.326032	1.93e-06	0.00043098
ENSRNOG00000008749	3	6430201	6578882	+	Col5a1	protein_coding	176.38	93.4497	0.529821	-0.916422	2.17e-06	0.000476847
ENSRNOG00000006972	5	64789456	64800810	+	Zfp189	protein_coding	88.1719	158.501	1.79764	0.846106	2.52e-06	0.000542333
ENSRNOG00000016558	19	10731855	10752641	+	Pllp	protein_coding	402.967	269.408	0.668562	-0.580866	2.6e-06	0.000548623
ENSRNOG00000055564	3	82854777	82856171	-	RGD1564664	protein_coding	107.424	181.066	1.68553	0.753203	2.66e-06	0.000550477
ENSRNOG00000016180	5	25577451	25584288	-	Pdp1	protein_coding	509.705	682.696	1.3394	0.421582	2.86e-06	0.00057936
ENSRNOG00000014456	9	61655963	61675873	+	Coq10b	protein_coding	136.489	218.8	1.60306	0.680832	3.22e-06	0.000640372
ENSRNOG00000000781	20	2098375	2103864	-	Rnf39	protein_coding	160.037	246.324	1.53917	0.622151	3.56e-06	0.000696333
ENSRNOG00000026985	8	48997184	49045154	-	Phldb1	protein_coding	949.738	681.881	0.717967	-0.47801	3.72e-06	0.000714035
ENSRNOG00000017938	1	255564409	255654932	+	Btaf1	protein_coding	504.397	677.422	1.34303	0.425496	4.07e-06	0.000764337
ENSRNOG00000006329	14	106008086	106061641	+	Peli1	protein_coding	185.036	276.806	1.49596	0.581067	4.13e-06	0.000764337
ENSRNOG00000026293	5	114011189	114014277	-	Jun	protein_coding	693.254	909.381	1.31176	0.3915	4.27e-06	0.000770562
ENSRNOG00000010617	7	124501988	124620703	-	Scube1	protein_coding	694.954	488.732	0.703258	-0.507874	4.3e-06	0.000770562
ENSRNOG00000011921	16	61078175	61091169	-	Dusp4	protein_coding	123.226	197.663	1.60407	0.681735	4.59e-06	0.000794824
ENSRNOG00000000796	20	28027054	28076664	+	Ranbp2	protein_coding	1879.48	2351.97	1.25139	0.323537	4.53e-06	0.000794824
ENSRNOG00000027230	18	17043903	17332210	+	Fhod3	protein_coding	1445.97	1157.51	0.800506	-0.321016	4.95e-06	0.000844864
ENSRNOG00000014363	16	2743823	3026760	+	Arhgef3	protein_coding	910.906	1175.88	1.29089	0.368362	5.17e-06	0.000867782
ENSRNOG00000018714	17	82065937	82091362	+	Arl5b	protein_coding	192.382	297.637	1.54712	0.629584	5.61e-06	0.000928026
ENSRNOG00000006052	3	162791355	162872831	-	Sulf2	protein_coding	2476.07	1993.19	0.804982	-0.312972	6.88e-06	0.00112003
ENSRNOG00000005711	5	92862267	93244202	-	Ptprd	protein_coding	3142.95	2584.63	0.822359	-0.28216	7.45e-06	0.00119537
ENSRNOG00000047098	1	168945449	168965566	+	LOC103694857	protein_coding	118.215	203.431	1.72086	0.783132	7.7e-06	0.00121734
ENSRNOG00000047098	1	168945449	168965566	+	LOC103694857	protein_coding	118.215	203.431	1.72086	0.783132	7.7e-06	0.00121734
ENSRNOG00000047098	1	168945449	168965566	+	LOC103694857	protein_coding	118.215	203.431	1.72086	0.783132	7.7e-06	0.00121734
ENSRNOG00000019578	1	85405499	85408444	-	Rps16	protein_coding	2321.19	2813.6	1.21213	0.277548	9.12e-06	0.00142073
ENSRNOG00000020205	5	173589819	173622645	-	Agrn	protein_coding	2096.56	1738.25	0.829098	-0.270385	9.3e-06	0.00142798
ENSRNOG00000056658	1	187149453	187261632	+	Xylt1	protein_coding	535.497	402.393	0.751439	-0.412271	1.02e-05	0.00154543
ENSRNOG00000042233	7	2972900	2973977	-	Rpl41	protein_coding	2648.85	3235.92	1.22163	0.28881	1.09e-05	0.00161925
ENSRNOG00000025053	7	70846344	70926903	-	Lrp1	protein_coding	8003.21	6609.86	0.825901	-0.275959	1.15e-05	0.00168866
ENSRNOG00000023993	9	100171772	100253609	-	Kif1a	protein_coding	15371.4	13402.9	0.871936	-0.197706	1.28e-05	0.00186418
ENSRNOG00000002753	10	90731865	90746936	+	Adam11	protein_coding	1646.34	1372.79	0.833842	-0.262153	1.32e-05	0.00187857
ENSRNOG00000061731	X	157015305	157028434	-	Plxnb3	protein_coding	223.744	135.93	0.607523	-0.718989	1.33e-05	0.00187857
ENSRNOG00000012939	7	12742416	12762374	-	Abca7	protein_coding	529.923	397.796	0.750667	-0.413754	1.36e-05	0.00189891
ENSRNOG00000018680	18	70970596	70975494	+	Rpl17	protein_coding	1720.54	2106.45	1.2243	0.291955	1.4e-05	0.00193274
ENSRNOG00000013729	4	65834035	65962539	-	RGD1306271	protein_coding	1093.21	874.364	0.799811	-0.322269	1.53e-05	0.0020838
ENSRNOG00000015434	7	12414733	12424367	-	Midn	protein_coding	499.266	682.485	1.36698	0.450988	1.68e-05	0.00225944
ENSRNOG00000053889	8	117620317	117648028	+	Celsr3	protein_coding	1112.37	873.327	0.785108	-0.349036	1.78e-05	0.0023282
ENSRNOG00000015655	2	203423143	203494391	-	Ptgfrn	protein_coding	1113.8	870.147	0.781241	-0.35616	1.77e-05	0.0023282
ENSRNOG00000060528	10	82129506	82197848	-	Cacna1g	protein_coding	1584.55	1293.2	0.816132	-0.293126	1.85e-05	0.00239849
ENSRNOG00000017003	4	121217629	121257885	-	Plxna1	protein_coding	2262.18	1884.22	0.832925	-0.263742	1.96e-05	0.00250609
ENSRNOG00000020339	1	266952561	267038883	+	Neurl1	protein_coding	2339.26	2753.95	1.17728	0.235451	1.99e-05	0.0025127
ENSRNOG00000001254	20	12773427	12801180	+	Col6a2	protein_coding	118.042	65.3887	0.553947	-0.85218	2.09e-05	0.00259005
ENSRNOG00000014900	17	57031766	57090888	+	Crem	protein_coding	84.1937	143.05	1.69906	0.764739	2.12e-05	0.00259005
ENSRNOG00000011815	1	24185435	24302298	-	Sgk1	protein_coding	363.844	496.123	1.36356	0.44738	2.11e-05	0.00259005
ENSRNOG00000007044	3	159321310	159347631	+	L3mbtl1	protein_coding	153.361	91.9833	0.599783	-0.737489	2.26e-05	0.00272302
ENSRNOG00000014367	4	70903253	70918514	+	Ephb6	protein_coding	3518.92	2931.26	0.833	-0.263612	2.41e-05	0.00279596
ENSRNOG00000013089	15	48030973	48189951	+	Kif13b	protein_coding	297.653	204.873	0.688294	-0.538903	2.42e-05	0.00279596
ENSRNOG00000016885	17	67887939	67945037	-	Klf6	protein_coding	309.149	211.551	0.684303	-0.547294	2.43e-05	0.00279596
ENSRNOG00000061230	X	156909913	156928057	+	L1cam	protein_coding	3850.55	3221.12	0.836534	-0.257504	2.45e-05	0.00279596
ENSRNOG00000019743	9	17705212	17725378	+	Tmem63b	protein_coding	1365.53	1118.6	0.819168	-0.287769	2.42e-05	0.00279596
ENSRNOG00000041744	6	133662524	133662603	+	AABR07065531.1	miRNA	514.555	359.774	0.699196	-0.516232	2.51e-05	0.00284183
ENSRNOG00000024603	7	12282109	12283608	-	Rps15	protein_coding	1813.89	2247.43	1.23901	0.309186	2.86e-05	0.00320493
ENSRNOG00000008551	6	47899558	47904163	-	Rps7	protein_coding	1994.08	2416.68	1.21193	0.277304	3e-05	0.00332463
ENSRNOG00000011427	15	52241801	52261276	+	Hr	protein_coding	177.189	112.339	0.634006	-0.657431	3.13e-05	0.00342744
ENSRNOG00000046996	13	90579846	90589466	-	Pea15	protein_coding	6171.26	7125.45	1.15462	0.207417	3.22e-05	0.00349705
ENSRNOG00000004964	7	2989340	3010350	-	Erbb3	protein_coding	248.975	152.527	0.612621	-0.706933	3.3e-05	0.00354801
ENSRNOG00000007390	6	76267228	76270457	-	Nfkbia	protein_coding	100.26	162.796	1.62373	0.699311	3.34e-05	0.00354951
ENSRNOG00000033912	16	20136008	20148867	-	Fcho1	protein_coding	1013.6	793.522	0.782873	-0.35315	3.54e-05	0.00366109
ENSRNOG00000042960	15	61551861	61564695	-	Rgcc	protein_coding	328.149	452.373	1.37856	0.463161	3.53e-05	0.00366109
ENSRNOG00000026716	14	44524416	44527613	+	Rpl9	protein_coding	2121.88	2570.45	1.2114	0.276675	3.51e-05	0.00366109
ENSRNOG00000026716	14	44524416	44527613	+	Rpl9	protein_coding	2121.88	2570.45	1.2114	0.276675	3.51e-05	0.00366109
ENSRNOG00000026716	14	44524416	44527613	+	Rpl9	protein_coding	2121.88	2570.45	1.2114	0.276675	3.51e-05	0.00366109
ENSRNOG00000050057	10	13723405	13779963	+	Abca3	protein_coding	1672.13	1358.62	0.812505	-0.299551	3.58e-05	0.00366791
ENSRNOG00000047014	2	22909569	23009678	+	Homer1	protein_coding	699.596	876.007	1.25216	0.32442	4.17e-05	0.0041869
ENSRNOG00000007726	8	48472824	48481001	+	Mcam	protein_coding	190.439	108.467	0.569565	-0.812066	4.16e-05	0.0041869
ENSRNOG00000024711	10	102303028	102576878	-	Sdk2	protein_coding	637.631	478.861	0.751	-0.413115	4.21e-05	0.0041869
ENSRNOG00000005108	14	78640620	78665966	+	Wfs1	protein_coding	3127.78	3761.67	1.20267	0.266236	4.42e-05	0.00435601
ENSRNOG00000017939	3	60513077	60611924	-	Chn1	protein_coding	8262.37	9360.94	1.13296	0.180097	4.46e-05	0.00435628
ENSRNOG00000028650	6	137164535	137177622	+	Inf2	protein_coding	664.821	505.399	0.760203	-0.395543	5.06e-05	0.00490261
ENSRNOG00000030705	7	117661661	117672373	-	Cpsf1	protein_coding	707.977	563.739	0.796267	-0.328676	5.73e-05	0.00549366
ENSRNOG00000056135	X	111884295	111887906	-	Tsc22d3	protein_coding	398.067	524.464	1.31753	0.397835	5.95e-05	0.00565378
ENSRNOG00000008519	8	102088505	102159828	-	RGD1309079	protein_coding	611.682	476.497	0.778996	-0.360313	6.21e-05	0.00585349
ENSRNOG00000014179	10	14088319	14089979	+	Rps2	protein_coding	2004.44	2454.25	1.22441	0.292085	6.42e-05	0.00599928
ENSRNOG00000001004	12	36871999	37033701	+	Ncor2	protein_coding	1922.53	1556.79	0.809759	-0.304436	6.62e-05	0.00608278
ENSRNOG00000020595	1	101116629	101118835	-	Rps11	protein_coding	1990.46	2346.86	1.17905	0.237627	6.6e-05	0.00608278
ENSRNOG00000013194	1	53360157	53499445	+	Rps6ka2	protein_coding	938.155	1188.86	1.26724	0.341686	6.75e-05	0.00614658
ENSRNOG00000006867	6	58467254	58558631	+	Etv1	protein_coding	1835.04	1473.27	0.802856	-0.316786	6.98e-05	0.00630165
ENSRNOG00000052113	10	82800704	82816731	+	Ppp1r9b	protein_coding	8006.73	9084.63	1.13462	0.182215	7.77e-05	0.00696109
ENSRNOG00000052707	19	25526751	25749550	+	Cacna1a	protein_coding	2674.89	2300.13	0.859898	-0.217762	8.11e-05	0.00720591
ENSRNOG00000014714	4	70918632	70934295	-	Trpv6	protein_coding	631.801	497.302	0.787119	-0.345347	8.34e-05	0.00734346
ENSRNOG00000020058	2	211183311	211207465	-	Celsr2	protein_coding	5636.33	4706.33	0.834998	-0.260155	8.82e-05	0.00746711
ENSRNOG00000013171	8	115344999	115358046	-	Grm2	protein_coding	441.72	305.341	0.691255	-0.532711	8.72e-05	0.00746711
ENSRNOG00000050997	6	60132024	60151420	-	Ifrd1	protein_coding	297.617	397.469	1.3355	0.417384	8.83e-05	0.00746711
ENSRNOG00000007284	5	138154673	138182897	+	Slc2a1	protein_coding	686.519	857.374	1.24887	0.320624	8.65e-05	0.00746711
ENSRNOG00000018232	9	16737642	16747225	+	Srf	protein_coding	675.472	848.483	1.25613	0.328991	8.8e-05	0.00746711
ENSRNOG00000007367	10	74861714	74884196	+	Sept4	protein_coding	1428.29	1113.07	0.7793	-0.359749	9.82e-05	0.00805749
ENSRNOG00000023148	2	216863428	217056523	+	Col11a1	protein_coding	84.3225	43.1032	0.511171	-0.968123	9.78e-05	0.00805749
ENSRNOG00000000412	20	34258791	34420824	+	Slc35f1	protein_coding	1292.61	1070.81	0.828407	-0.271589	9.69e-05	0.00805749
ENSRNOG00000018087	17	80882666	80891212	+	Vim	protein_coding	170.189	252.769	1.48523	0.570684	9.81e-05	0.00805749
ENSRNOG00000000105	17	10756285	10818835	-	Cplx2	protein_coding	3779.03	4539.7	1.20129	0.264581	0.000100672	0.00819484
ENSRNOG00000056106	7	141702038	141879951	+	Dip2b	protein_coding	1367.5	1128.59	0.825298	-0.277014	0.00010751	0.00868567
ENSRNOG00000012747	17	7675531	7797863	+	Spock1	protein_coding	1851.7	1564.38	0.844835	-0.243259	0.000109664	0.0087936
ENSRNOG00000003469	19	26026043	26053762	-	MAST1	protein_coding	1574.91	1323.34	0.840268	-0.251079	0.000114364	0.00910256
ENSRNOG00000027992	11	37004902	37253776	-	Dscam	protein_coding	657.628	514.536	0.782412	-0.354	0.000120009	0.00943138
ENSRNOG00000008810	3	2262253	2270995	+	Nsmf	protein_coding	6727.33	7639.07	1.13553	0.183363	0.000120251	0.00943138
ENSRNOG00000059268	20	3329677	3344286	-	Ppp1r10	protein_coding	549.994	411.722	0.748593	-0.417746	0.000122957	0.00957371
ENSRNOG00000004589	6	104068547	104250174	+	Galnt16	protein_coding	2232.62	1920.01	0.85998	-0.217625	0.000132302	0.0102273
ENSRNOG00000001249	20	12658065	12675561	+	Col6a1	protein_coding	219.298	151.64	0.69148	-0.532241	0.000139348	0.0105467
ENSRNOG00000043212	20	13044104	13127487	+	Dip2a	protein_coding	796.698	634.44	0.796338	-0.328547	0.000139379	0.0105467
ENSRNOG00000049511	9	10471742	10490416	+	Safb2	protein_coding	681.269	542.097	0.795716	-0.329674	0.00013851	0.0105467
ENSRNOG00000005209	3	108795235	108857556	+	Spred1	protein_coding	439.467	572.386	1.30245	0.381233	0.000143049	0.0107487
ENSRNOG00000000894	12	5573729	5822874	-	Fry	protein_coding	3481.3	2970.11	0.853162	-0.229108	0.000148976	0.0111163
ENSRNOG00000016957	9	80118029	80144789	+	Igfbp2	protein_coding	55.1675	100.775	1.82671	0.869245	0.000156344	0.0115856
ENSRNOG00000019465	2	210896656	210934749	-	Gnai3	protein_coding	311.199	412.201	1.32456	0.405511	0.000158504	0.0116652
ENSRNOG00000025011	15	28612932	28672569	-	Chd8	protein_coding	1454.07	1218.75	0.838168	-0.254689	0.000163598	0.0119582
ENSRNOG00000052840	10	93811350	94127697	+	Tanc2	protein_coding	1769.58	1464	0.827317	-0.273487	0.00016783	0.0121847
ENSRNOG00000060615	10	46511271	46571583	+	Rai1	protein_coding	1104.03	911.779	0.825863	-0.276025	0.000170826	0.012319
ENSRNOG00000046000	1	80491480	80515694	-	Clasrp	protein_coding	479.445	365.412	0.762157	-0.391841	0.000174517	0.0125012
ENSRNOG00000011323	15	52220578	52227706	+	Lgi3	protein_coding	985.765	776.486	0.787699	-0.344284	0.000200356	0.0142571
ENSRNOG00000008425	13	52267254	52514875	-	Nav1	protein_coding	889.018	717.43	0.806992	-0.309374	0.000202391	0.0143071
ENSRNOG00000028946	10	102244681	102269272	-	Cdc42ep4	protein_coding	533.319	679.742	1.27455	0.34999	0.000206337	0.0144908
ENSRNOG00000004392	10	109188112	109224370	-	Aatk	protein_coding	2089.04	1733.59	0.82985	-0.269078	0.000212285	0.0145299
ENSRNOG00000018686	1	197908094	197919560	-	Atxn2l	protein_coding	1414.21	1180.14	0.834487	-0.261039	0.000209977	0.0145299
ENSRNOG00000008666	17	87274944	87681317	+	Etl4	protein_coding	1553.07	1306.64	0.841325	-0.249266	0.000211589	0.0145299
ENSRNOG00000001720	11	74312806	74315248	-	Hes1	protein_coding	54.5154	95.0281	1.74314	0.80169	0.000212302	0.0145299
ENSRNOG00000011202	3	176530560	176548064	-	Chrna4	protein_coding	766.469	610.372	0.796343	-0.328538	0.000226701	0.0154171
ENSRNOG00000026260	5	154388140	154394328	-	Rpl11	protein_coding	1232.16	1456.54	1.18211	0.241364	0.000230981	0.0156094
ENSRNOG00000012840	10	40742400	40764185	-	Sparc	protein_coding	3323.96	3908.57	1.17588	0.233739	0.000234178	0.0157265
ENSRNOG00000014214	1	174132798	174135816	+	Rpl27a	protein_coding	1541.7	1853.45	1.20221	0.265689	0.000240922	0.0160789
ENSRNOG00000001030	15	58554374	58658153	+	Tsc22d1	protein_coding	4842.06	5481.32	1.13202	0.178904	0.000243195	0.0161304
ENSRNOG00000008678	4	118946268	119131202	-	Antxr1	protein_coding	179.48	117.453	0.654407	-0.61174	0.000256112	0.016883
ENSRNOG00000026643	8	17421557	17446165	+	Chordc1	protein_coding	393.428	505.064	1.28375	0.360365	0.000262799	0.0169088
ENSRNOG00000014013	9	46657575	46782545	+	Map4k4	protein_coding	1292.44	1073.25	0.830405	-0.268113	0.000261126	0.0169088
ENSRNOG00000055089	5	70245843	70424112	+	Slc44a1	protein_coding	799.452	633.523	0.792446	-0.335615	0.000261501	0.0169088
ENSRNOG00000058561	10	13145099	13162343	+	Srrm2	protein_coding	6412.55	5371.32	0.837626	-0.255622	0.000258218	0.0169088
ENSRNOG00000026610	5	141415075	141430659	-	Akirin1	protein_coding	636.004	776.19	1.22042	0.287372	0.000265034	0.0169511
ENSRNOG00000009033	13	49285310	49313940	-	Cntn2	protein_coding	930.525	748.409	0.804287	-0.314218	0.000287195	0.0182598
ENSRNOG00000022305	10	549883	672196	-	Abcc1	protein_coding	457.83	340.198	0.743065	-0.428439	0.000289468	0.0182961
ENSRNOG00000018484	5	135997725	136002900	-	Plk3	protein_coding	56.8571	100.053	1.75973	0.815354	0.00029213	0.0183564
ENSRNOG00000000130	5	58393233	58401870	+	Dnajb5	protein_coding	1262.65	1492.13	1.18175	0.240921	0.000296737	0.0184303
ENSRNOG00000008738	3	82081906	82097056	+	Tp53i11	protein_coding	1111.07	1314.1	1.18273	0.242124	0.000296569	0.0184303
ENSRNOG00000033893	10	14730941	14788617	-	Cacna1h	protein_coding	810.079	663.743	0.819356	-0.287438	0.000306768	0.0189211
ENSRNOG00000060687	3	139695028	139833967	+	Slc24a3	protein_coding	793.321	633.433	0.798458	-0.324712	0.000308162	0.0189211
ENSRNOG00000021441	4	9347528	9773670	+	Reln	protein_coding	2245.51	1857.69	0.827292	-0.273532	0.000314274	0.0190143
ENSRNOG00000004214	10	55492404	55496012	+	Rpl26	protein_coding	1640.78	1999.51	1.21863	0.285265	0.000314988	0.0190143
ENSRNOG00000013679	17	13488376	13553974	+	Sema4d	protein_coding	605.397	448.992	0.741649	-0.431191	0.000314203	0.0190143
ENSRNOG00000015558	3	177078709	177089199	-	Zfp512b	protein_coding	832.98	686.454	0.824094	-0.279119	0.000320962	0.0192667
ENSRNOG00000025745	18	24734330	24735349	-	Gpr17	protein_coding	165.942	108.11	0.651493	-0.618179	0.000326399	0.0194842
ENSRNOG00000011969	15	107945664	108210826	-	Dock9	protein_coding	2019.32	1749.44	0.866354	-0.206971	0.000330297	0.0195002
ENSRNOG00000002896	13	79077033	79088127	-	Prdx6	protein_coding	1017.87	1214.56	1.19324	0.254889	0.000328558	0.0195002
ENSRNOG00000007285	3	163552166	163555596	+	Tp53rk	protein_coding	43.2316	78.6122	1.8184	0.862667	0.000348069	0.0204372
ENSRNOG00000015991	5	59128315	59147255	+	Npr2	protein_coding	364.462	272.685	0.748185	-0.418534	0.000350808	0.020486
ENSRNOG00000001295	20	13130636	13142856	-	S100b	protein_coding	5929.53	6986.69	1.17829	0.23669	0.000368326	0.02134
ENSRNOG00000013851	18	32594958	32609864	+	Spry4	protein_coding	98.0004	154.182	1.57328	0.653775	0.000369404	0.02134
ENSRNOG00000036869	5	173230364	173233188	-	Tmem88b	protein_coding	133.226	76.5691	0.574732	-0.799038	0.000383617	0.0220426
ENSRNOG00000042821	3	94010475	94028621	+	Cd59	protein_coding	572.682	702.793	1.22719	0.295364	0.000387946	0.0220555
ENSRNOG00000002050	14	33010300	33070190	+	Igfbp7	protein_coding	308.475	415.563	1.34715	0.429912	0.000385993	0.0220555
ENSRNOG00000058003	1	178636544	178935051	+	Spon1	protein_coding	1427.34	1215.46	0.851553	-0.231832	0.000392907	0.0222199
ENSRNOG00000014007	17	23823632	23923792	-	Gfod1	protein_coding	415.09	525.554	1.26612	0.340416	0.000405039	0.0227861
ENSRNOG00000004932	14	60123169	60229734	+	Sel1l3	protein_coding	604.898	485.022	0.801825	-0.318641	0.000411829	0.0230474
ENSRNOG00000026787	3	110574417	110589921	+	Disp2	protein_coding	6985.28	6049.02	0.865967	-0.207616	0.000426447	0.0237418
ENSRNOG00000020254	9	98555169	98597359	-	Per2	protein_coding	680.946	841.493	1.23577	0.305411	0.000445631	0.024682
ENSRNOG00000013300	5	150719569	150723321	-	Atpif1	protein_coding	1130.06	1331.15	1.17794	0.236268	0.000485739	0.0264937
ENSRNOG00000015763	4	117490035	117490721	-	Cml3	protein_coding	273.556	370.739	1.35526	0.438566	0.000484652	0.0264937
ENSRNOG00000018183	5	157848206	157956132	+	Ubr4	protein_coding	3799.45	3241.24	0.853082	-0.229243	0.000485019	0.0264937
ENSRNOG00000033433	8	128659868	128672284	-	Csrnp1	protein_coding	82.22	133.479	1.62344	0.69905	0.000491573	0.0265425
ENSRNOG00000027204	1	164225934	164292093	+	Map6	protein_coding	1428.85	1202.15	0.841344	-0.249233	0.000489146	0.0265425
ENSRNOG00000017428	2	29675391	29768750	-	Map1b	protein_coding	25524.4	22040.6	0.863511	-0.211713	0.000500692	0.0268997
ENSRNOG00000018980	9	17086475	17110770	+	Tjap1	protein_coding	223.072	154.828	0.694075	-0.526837	0.000514986	0.02753
ENSRNOG00000042886	7	18682071	18683440	-	Rps28	protein_coding	311.748	406.027	1.30242	0.381194	0.000522218	0.0276364
ENSRNOG00000050543	9	10450205	10471176	-	Safb	protein_coding	1182.99	999.304	0.84473	-0.243438	0.000524693	0.0276364
ENSRNOG00000010298	14	85753760	85758145	+	Xbp1	protein_coding	724.404	879.836	1.21457	0.28044	0.000522378	0.0276364
ENSRNOG00000024039	2	22195600	22310312	+	Serinc5	protein_coding	685.4	432.13	0.630479	-0.665481	0.000534897	0.0280364
ENSRNOG00000032328	17	12762752	12763952	+	Diras2	protein_coding	1883.22	1568.43	0.832848	-0.263875	0.000550643	0.0285205
ENSRNOG00000060179	X	139579268	139916883	-	Gpc3	protein_coding	51.058	93.1322	1.82405	0.867144	0.000552095	0.0285205
ENSRNOG00000003741	10	108682638	108691367	-	Nptx1	protein_coding	3792.95	4351.99	1.14739	0.198353	0.000547619	0.0285205
ENSRNOG00000019677	8	62569528	62616828	-	Arid3b	protein_coding	63.0126	106.149	1.68457	0.752381	0.000557479	0.0286608
ENSRNOG00000007346	7	142869752	142878347	+	Grasp	protein_coding	418.154	527.819	1.26226	0.336009	0.000562676	0.0287902
ENSRNOG00000060464	X	156363405	156379189	-	Plxna3	protein_coding	827.988	680.955	0.822422	-0.282049	0.000565492	0.0287972
ENSRNOG00000051483	1	77803475	77808513	-	Sepw1	protein_coding	1655.35	1912.18	1.15515	0.20808	0.0005936	0.030086
ENSRNOG00000024602	1	185356975	185538694	+	Plekha7	protein_coding	273.425	201.471	0.736843	-0.44057	0.000607014	0.0306214
ENSRNOG00000029938	13	49850189	49911202	+	Pik3c2b	protein_coding	320.899	238.769	0.744062	-0.426505	0.000614219	0.0308401
ENSRNOG00000008996	6	26939697	27024129	-	Dpysl5	protein_coding	395.914	306.418	0.77395	-0.369688	0.000627757	0.0312397
ENSRNOG00000006010	8	132665927	132753292	-	RGD1566368	protein_coding	43.5648	84.0211	1.92865	0.947589	0.000630898	0.0312397
ENSRNOG00000018645	8	128806129	128809986	+	Rpsa	protein_coding	2484.26	2866.32	1.1538	0.206387	0.000629914	0.0312397
ENSRNOG00000021130	1	102110708	102191287	-	Abcc8	protein_coding	560.917	453.976	0.809346	-0.305171	0.000647523	0.0317499
ENSRNOG00000020027	2	187977008	188021367	+	Arhgef2	protein_coding	1421.83	1192.94	0.839021	-0.253221	0.000649349	0.0317499
ENSRNOG00000042731	4	153330069	153350446	+	Slc25a18	protein_coding	551.782	675.968	1.22506	0.292857	0.000650068	0.0317499
ENSRNOG00000056765	X	156438251	156440461	-	Rpl10	protein_coding	2012.1	2345.39	1.16564	0.221127	0.000659474	0.0320636
ENSRNOG00000056765	X	156438251	156440461	-	Rpl10	protein_coding	2012.1	2345.39	1.16564	0.221127	0.000659474	0.0320636
ENSRNOG00000004147	10	98319480	98390384	-	Abca8a	protein_coding	308.585	220.973	0.716086	-0.481795	0.000674712	0.0325102
ENSRNOG00000006997	11	24425005	24641858	-	App	protein_coding	19224.1	16817.2	0.874797	-0.19298	0.000673982	0.0325102
ENSRNOG00000023781	7	117230319	117289961	-	Plec	protein_coding	2930.78	2499.7	0.852914	-0.229529	0.000680633	0.0326491
ENSRNOG00000009350	10	64865805	64915148	-	Sez6	protein_coding	3677.35	3185.9	0.866357	-0.206966	0.000692519	0.0330716
ENSRNOG00000001368	12	41073824	41148490	+	Rph3a	protein_coding	4202.19	3728.61	0.887302	-0.172503	0.0007031	0.0332811
ENSRNOG00000004426	14	113966611	113968268	-	Rps27a	protein_coding	1694.54	1990.58	1.17471	0.232299	0.000701445	0.0332811
ENSRNOG00000020369	1	215828102	215846911	-	Igf2	protein_coding	58.7658	105.368	1.79302	0.842391	0.000714419	0.0335215
ENSRNOG00000020982	1	221420271	221421842	+	LOC100360647	protein_coding	2177.69	2534.99	1.16407	0.219183	0.000713746	0.0335215
ENSRNOG00000020982	1	221420271	221421842	+	LOC100360647	protein_coding	2177.69	2534.99	1.16407	0.219183	0.000713746	0.0335215
ENSRNOG00000011132	3	94064234	94182714	-	LOC100362814	protein_coding	1308.65	1089.82	0.832785	-0.263984	0.000719655	0.0336204
ENSRNOG00000019974	16	20668971	20671127	+	Uba52	protein_coding	2131.68	2557.59	1.1998	0.262796	0.000728205	0.0338726
ENSRNOG00000030597	7	2795901	2813887	+	Ankrd52	protein_coding	1419.2	1191.54	0.83959	-0.252243	0.000747476	0.0344705
ENSRNOG00000021468	4	54474136	55407922	-	Grm8	protein_coding	435.224	339.509	0.780078	-0.358311	0.000745548	0.0344705
ENSRNOG00000019484	5	136669674	136703697	+	Slc6a9	protein_coding	644.648	495.421	0.768515	-0.379854	0.000767111	0.0352248
ENSRNOG00000009625	15	43477629	43542939	-	Dpysl2	protein_coding	5368.45	4671.69	0.870213	-0.20056	0.000771798	0.0352892
ENSRNOG00000005195	3	143219686	143223615	-	Cst3	protein_coding	8618.31	9918.14	1.15082	0.202665	0.00078912	0.0359284
ENSRNOG00000019435	1	266059331	266074181	-	Psd	protein_coding	3176.63	3575.2	1.12547	0.170527	0.000793404	0.035971
ENSRNOG00000001851	4	182483194	182565436	+	Far2	protein_coding	920.421	758.23	0.823786	-0.279659	0.000797626	0.0360105
ENSRNOG00000017556	3	80833272	80841006	+	Chrm4	protein_coding	374.035	482.721	1.29058	0.368015	0.000805984	0.0362356
ENSRNOG00000000036	13	49074644	49082729	+	Klhdc8a	protein_coding	367.88	285.473	0.775996	-0.365879	0.000810405	0.0362825
ENSRNOG00000032922	2	144646308	144939389	+	Dclk1	protein_coding	13149.9	11602	0.882289	-0.180676	0.00082028	0.0365722
ENSRNOG00000026065	1	260843483	260992366	-	Slit1	protein_coding	2061.7	1737.18	0.842596	-0.247087	0.00082705	0.0367217
ENSRNOG00000009439	8	85838869	85840818	-	Eef1a1	protein_coding	14218.8	15917.2	1.11944	0.162782	0.000839493	0.0371208
ENSRNOG00000006355	7	14340170	14369821	-	Akap8l	protein_coding	604.423	493.049	0.815735	-0.293827	0.000889628	0.0380839
ENSRNOG00000020263	1	81852429	81881549	-	Atp1a3	protein_coding	24014.7	20672.3	0.86082	-0.216217	0.000877984	0.0380839
ENSRNOG00000053200	9	86312501	86571765	-	Dock10	protein_coding	425.473	330.569	0.776945	-0.364115	0.000879741	0.0380839
ENSRNOG00000052357	6	25598936	25616995	-	Fosl2	protein_coding	61.8711	101.118	1.63434	0.708707	0.000883188	0.0380839
ENSRNOG00000001091	12	38024519	38053085	-	Hip1r	protein_coding	929.386	762.157	0.820066	-0.286189	0.00086495	0.0380839
ENSRNOG00000046168	2	166140112	166218774	+	Ppm1l	protein_coding	1525.5	1301.77	0.853337	-0.228812	0.000886665	0.0380839
ENSRNOG00000006952	3	163329975	163477715	-	Prex1	protein_coding	1358.42	1613.91	1.18808	0.248626	0.000885331	0.0380839
ENSRNOG00000005003	6	144384773	145133042	+	Ptprn2	protein_coding	5298.04	4688.12	0.884879	-0.176449	0.000884354	0.0380839
ENSRNOG00000021303	10	46722109	46762250	+	Drc3	protein_coding	134.052	190.218	1.41899	0.504865	0.000922367	0.0390632
ENSRNOG00000001329	12	19166239	19167015	-	Gjc3	protein_coding	85.7271	49.283	0.574882	-0.798662	0.000947768	0.0390632
ENSRNOG00000006589	20	13732198	13732859	+	LOC103694877	protein_coding	1589.11	1871.27	1.17755	0.235793	0.000947055	0.0390632
ENSRNOG00000006589	20	13732198	13732859	+	LOC103694877	protein_coding	1589.11	1871.27	1.17755	0.235793	0.000947055	0.0390632
ENSRNOG00000006984	7	130121687	130128604	-	Mapk11	protein_coding	503.098	397.241	0.789589	-0.340827	0.000932934	0.0390632
ENSRNOG00000020618	1	101120737	101123387	-	Rpl13a	protein_coding	2431.9	2834.07	1.16537	0.220791	0.000948185	0.0390632
ENSRNOG00000018795	16	20293229	20295294	+	Rpl18a	protein_coding	1690.35	1946.35	1.15145	0.20345	0.000924857	0.0390632
ENSRNOG00000000957	12	9996951	9998779	-	Rpl21	protein_coding	2319.38	2675.34	1.15347	0.205982	0.00094533	0.0390632
ENSRNOG00000023385	9	80002045	80005027	+	Rpl37a	protein_coding	1666.63	1967.87	1.18075	0.239701	0.000944394	0.0390632
ENSRNOG00000009378	8	69121682	69126805	+	Rpl4	protein_coding	3898.52	4465.66	1.14548	0.195946	0.000948859	0.0390632
ENSRNOG00000033906	1	71270107	71290337	-	Zfp667	protein_coding	152.98	212.736	1.39061	0.475716	0.000933022	0.0390632
ENSRNOG00000012207	9	37902303	38196273	-	Dst	protein_coding	8635.16	7523.67	0.871283	-0.198787	0.000973467	0.0396208
ENSRNOG00000001250	12	16118634	16126953	-	Lfng	protein_coding	130.44	184.899	1.4175	0.503353	0.000971146	0.0396208
ENSRNOG00000050087	19	50357338	50367187	-	Mphosph6	protein_coding	228.506	302.623	1.32436	0.405291	0.000969717	0.0396208
ENSRNOG00000007456	5	29538380	29562773	+	Calb1	protein_coding	793.043	973.01	1.22693	0.295055	0.0010117	0.0410214
ENSRNOG00000003707	X	71299662	71313542	-	Zmym3	protein_coding	1462.68	1255.46	0.858329	-0.220398	0.0010162	0.0410491
ENSRNOG00000018242	10	59585072	59608165	+	Camkk1	protein_coding	1900.81	2217.04	1.16636	0.222019	0.00103768	0.0416039
ENSRNOG00000023053	1	35280701	35319182	+	Ice1	protein_coding	1189.02	1001.54	0.842322	-0.247556	0.00103614	0.0416039
ENSRNOG00000014272	3	23294814	23297774	-	Rpl35	protein_coding	1592.06	1877.29	1.17916	0.237762	0.00107031	0.0427529
ENSRNOG00000036814	10	88914276	88967748	+	Atp6v0a1	protein_coding	6936.21	6231.4	0.898388	-0.15459	0.00107666	0.042757
ENSRNOG00000023851	2	203768117	203855573	+	Igsf3	protein_coding	447.394	356.415	0.796647	-0.327987	0.00107837	0.042757
ENSRNOG00000059381	11	32211115	32263899	+	Mrps6	protein_coding	159.655	219.058	1.37207	0.456355	0.00108547	0.04288
ENSRNOG00000019383	7	123043503	123058604	+	Tef	protein_coding	2780.38	3158.84	1.13611	0.184109	0.00110363	0.0434377
ENSRNOG00000054008	8	62220892	62248017	-	Scamp5	protein_coding	3505.17	3085.2	0.880187	-0.184118	0.00113618	0.0445557
ENSRNOG00000025142	1	144831523	144835747	+	Mex3b	protein_coding	213.391	150.861	0.706969	-0.500282	0.00114642	0.0446315
ENSRNOG00000016103	1	32058044	32084877	+	Nkd2	protein_coding	190.781	136.965	0.717918	-0.47811	0.00114369	0.0446315
ENSRNOG00000004560	3	1740024	1924827	-	Cacna1b	protein_coding	2492.91	2145.6	0.860681	-0.216449	0.00115582	0.0446735
ENSRNOG00000004100	7	99954492	99961026	+	Trib1	protein_coding	96.6306	143.825	1.4884	0.573765	0.00115261	0.0446735
ENSRNOG00000012942	9	2190915	2274629	+	Satb1	protein_coding	1329.83	1141.22	0.858176	-0.220654	0.00116361	0.0448136
ENSRNOG00000019937	19	58823814	58862926	+	Kcnk1	protein_coding	788.249	934.77	1.18588	0.245961	0.00118262	0.0450823
ENSRNOG00000031890	8	53839098	53901358	-	Ncam1	protein_coding	4063.19	3567.27	0.877949	-0.187791	0.00118317	0.0450823
ENSRNOG00000005345	6	37001356	37122023	-	Vsnl1	protein_coding	7207.95	8046.52	1.11634	0.158776	0.00117719	0.0450823
ENSRNOG00000019556	4	157977162	158010166	-	Cd9	protein_coding	312.582	231.579	0.740858	-0.43273	0.00120099	0.0454642
ENSRNOG00000002660	X	76083549	76087117	+	Magee1	protein_coding	1521.98	1290.88	0.848158	-0.237594	0.00120166	0.0454642
ENSRNOG00000008258	3	9861237	9936617	-	Fnbp1	protein_coding	703.105	564.192	0.802429	-0.317555	0.00122608	0.0457439
ENSRNOG00000022804	9	15068399	15125318	+	Foxp4	protein_coding	452.541	360.735	0.797131	-0.327111	0.00122127	0.0457439
ENSRNOG00000008209	7	107895109	107963142	-	St3gal1	protein_coding	504.848	398.289	0.788929	-0.342032	0.00121415	0.0457439
ENSRNOG00000013162	X	122808605	122811789	+	Zcchc12	protein_coding	1386.99	1632.46	1.17698	0.235095	0.0012229	0.0457439
ENSRNOG00000033280	9	111028575	111177602	+	Pam	protein_coding	4012.62	4477.56	1.11587	0.15817	0.00123491	0.045914
ENSRNOG00000032206	13	21678512	22590586	+	Cntnap5b	protein_coding	159.237	107.112	0.672656	-0.572059	0.00124083	0.0459748
ENSRNOG00000014010	15	52557607	52648972	+	Gfra2	protein_coding	777.328	631.819	0.812809	-0.299011	0.00129152	0.0476886
ENSRNOG00000007982	5	151573092	151627316	+	Slc9a1	protein_coding	582.794	475.956	0.816679	-0.292158	0.0013325	0.0490331
ENSRNOG00000016690	17	57976268	57984036	-	Idi1	protein_coding	212.614	285.748	1.34397	0.426505	0.00133803	0.0490685
ENSRNOG00000010746	4	147715473	147719072	-	Rpl32	protein_coding	1338.87	1566.49	1.17001	0.226526	0.0013472	0.0491348
ENSRNOG00000025244	12	11537950	11627563	-	Trrap	processed_transcript	2589.99	2260.92	0.872947	-0.196034	0.00134898	0.0491348
ENSRNOG00000024657	13	48807720	48848997	-	Mfsd4	protein_coding	692.466	573.842	0.828694	-0.271088	0.00136176	0.0494206
ENSRNOG00000024961	1	162284777	162300515	-	Usp35	protein_coding	257.704	193.928	0.752525	-0.410189	0.00136602	0.0494206
ENSRNOG00000053881	7	2529077	2547062	+	Baz2a	protein_coding	523.419	416.812	0.796325	-0.328571	0.00137101	0.0494344
ENSRNOG00000016322	5	156876706	156878486	+	Camk2n1	protein_coding	3293.47	3781.91	1.14831	0.199509	0.00140599	0.0505265
ENSRNOG00000020302	5	173654860	173659675	-	Klhl17	protein_coding	173.036	120.959	0.699035	-0.516563	0.00142859	0.0511674
ENSRNOG00000020479	1	185210922	185326314	+	Pik3c2a	protein_coding	332.874	436.087	1.31007	0.389641	0.00149227	0.0530942
ENSRNOG00000019007	8	129240528	129243402	+	Rpl14	protein_coding	1328.5	1548.4	1.16553	0.220985	0.00148757	0.0530942
ENSRNOG00000029912	11	86512797	86522168	+	Sept5	protein_coding	10274.3	11279.4	1.09783	0.134659	0.00150177	0.0532559
ENSRNOG00000007057	5	146383942	146739418	+	Csmd2	protein_coding	896.277	747.545	0.834057	-0.261783	0.00154769	0.0547038
ENSRNOG00000006526	4	14318274	14490446	-	Sema3c	protein_coding	811.491	655.213	0.807419	-0.30861	0.00157243	0.055396
ENSRNOG00000016896	7	121297355	121311565	-	Rpl3	protein_coding	3863.96	4379.65	1.13346	0.180735	0.00158933	0.055446
ENSRNOG00000014338	3	11442397	11452529	-	Slc25a25	protein_coding	577.514	693.723	1.20122	0.264504	0.00157998	0.055446
ENSRNOG00000009571	4	84597323	84676775	+	Wipf3	protein_coding	610.551	750.244	1.2288	0.297247	0.00158738	0.055446
ENSRNOG00000033099	18	66523120	67224566	-	Dcc	protein_coding	271.422	204.169	0.752221	-0.410772	0.00160175	0.0556983
ENSRNOG00000023529	14	2860965	2867397	-	Rpl5	protein_coding	2226.76	2541.2	1.14121	0.190565	0.00161471	0.0559679
ENSRNOG00000052424	12	49419582	49561038	+	2900026A02Rik	protein_coding	1352.34	1141.45	0.844058	-0.244585	0.00162945	0.0562974
ENSRNOG00000003999	6	28571351	28650148	+	Adcy3	protein_coding	1117.86	937.992	0.839099	-0.253087	0.0016424	0.0564816
ENSRNOG00000004099	13	44812567	44950762	+	R3hdm1	protein_coding	2172.79	1871.48	0.861328	-0.215366	0.0016453	0.0564816
ENSRNOG00000000989	12	11232964	11240400	-	Bud31	protein_coding	269.799	345.365	1.28008	0.356239	0.00166825	0.0570872
ENSRNOG00000021871	12	46728699	46789726	-	Gcn1l1	protein_coding	1380.35	1189.87	0.86201	-0.214224	0.00171467	0.0583041
ENSRNOG00000012802	16	46731403	46926245	+	Tenm3	protein_coding	1043.92	876.404	0.839534	-0.25234	0.00170958	0.0583041
ENSRNOG00000053203	4	153484876	153593773	-	Mical3	protein_coding	741.308	607.627	0.819668	-0.286888	0.00172996	0.058454
ENSRNOG00000023338	2	205160405	205202764	+	Tspan2	protein_coding	1102.09	694.315	0.629996	-0.666584	0.00172625	0.058454
ENSRNOG00000009299	14	80730307	80732010	-	Adra2c	protein_coding	98.549	143.45	1.45562	0.541638	0.00175827	0.0587941
ENSRNOG00000003276	10	67866940	68142864	-	Myo1d	protein_coding	177.241	123.435	0.696425	-0.52196	0.00176191	0.0587941
ENSRNOG00000045931	8	50310405	50520173	+	Sik3	protein_coding	1765.02	1533.34	0.868735	-0.203012	0.00174694	0.0587941
ENSRNOG00000017628	8	50222896	50231357	-	Tagln	protein_coding	46.0468	81.1564	1.76248	0.817604	0.00175285	0.0587941
ENSRNOG00000018774	18	56044369	56047316	+	Rps14	protein_coding	1311.56	1564.63	1.19295	0.254539	0.00177532	0.0590582
ENSRNOG00000018774	18	56044369	56047316	+	Rps14	protein_coding	1311.56	1564.63	1.19295	0.254539	0.00177532	0.0590582
ENSRNOG00000019645	14	83943977	84106997	-	Osbp2	protein_coding	949.462	796.703	0.83911	-0.253069	0.00178437	0.0591762
ENSRNOG00000000841	20	4806108	4818568	-	Ddx39b	protein_coding	2701.64	2324.25	0.860312	-0.217068	0.00180228	0.0593967
ENSRNOG00000003018	13	88995316	89032487	+	Olfml2b	protein_coding	119.392	77.27	0.647193	-0.627731	0.00180146	0.0593967
ENSRNOG00000032700	3	12448281	12467662	-	Zbtb34	protein_coding	324.586	252.734	0.778634	-0.360982	0.00180761	0.0593967
ENSRNOG00000018816	8	62298358	62309765	+	Cox5a	protein_coding	1518.54	1737.86	1.14443	0.194629	0.00181934	0.0594189
ENSRNOG00000002248	14	37551940	37756149	+	Fryl	protein_coding	569.449	457.368	0.803177	-0.31621	0.00181799	0.0594189
ENSRNOG00000003905	10	91878633	92008082	-	Nsf	protein_coding	13825.1	12535.2	0.906699	-0.141304	0.00183191	0.0596481
ENSRNOG00000038150	14	82053685	82055290	-	RGD1560394	protein_coding	170.717	245.489	1.43799	0.524056	0.00183982	0.0597245
ENSRNOG00000006617	4	75325651	77023138	+	Cntnap2	processed_transcript	958.881	815.016	0.849966	-0.234523	0.0018547	0.0598367
ENSRNOG00000016502	8	49737798	50055560	+	Dscaml1	protein_coding	818.637	690.535	0.843518	-0.24551	0.00185998	0.0598367
ENSRNOG00000022893	12	31530699	31620760	+	Rimbp2	protein_coding	1929.67	1681.68	0.871483	-0.198455	0.00185577	0.0598367
ENSRNOG00000009206	15	12827707	12831496	+	Fezf2	protein_coding	844.263	696.332	0.824781	-0.277917	0.00191091	0.0611093
ENSRNOG00000016580	2	19823234	19824804	+	Rps23	protein_coding	1748.43	2021.93	1.15642	0.209669	0.00190649	0.0611093
ENSRNOG00000034180	10	64336200	64336546	+	LOC100360781	protein_coding	588.168	704.328	1.19749	0.260019	0.00192579	0.0614025
ENSRNOG00000011893	2	185440291	185444897	-	Rps3a	protein_coding	1918.52	2240.44	1.16779	0.223787	0.00196628	0.0625078
ENSRNOG00000021027	1	101687855	101692846	+	Dbp	protein_coding	1026.48	1187.65	1.15701	0.210397	0.00203481	0.0637896
ENSRNOG00000027582	1	211423022	211438531	+	Dpysl4	protein_coding	778.955	652.464	0.837615	-0.255641	0.00203628	0.0637896
ENSRNOG00000004159	10	46955487	46969406	-	Flii	protein_coding	1022.95	878.144	0.858441	-0.220209	0.00203144	0.0637896
ENSRNOG00000020533	1	201499028	201548513	+	Htra1	protein_coding	642.048	766.465	1.19378	0.255539	0.00201965	0.0637896
ENSRNOG00000008001	5	128501847	128568188	+	Rab3b	protein_coding	647.025	537.193	0.830252	-0.26838	0.00202392	0.0637896
ENSRNOG00000002361	14	12218553	12315229	+	Prkg2	protein_coding	125.262	175.284	1.39934	0.484748	0.00205156	0.0640814
ENSRNOG00000016551	3	120726906	120764192	+	Bcl2l11	protein_coding	112.725	72.6895	0.644836	-0.632995	0.0020662	0.0643516
ENSRNOG00000048187	10	85573369	85574889	-	LOC691153	protein_coding	255.082	325.473	1.27595	0.351576	0.00207302	0.0643776
ENSRNOG00000061519	6	43234526	43343551	+	Asap2	protein_coding	401.942	311.69	0.775459	-0.366877	0.00208058	0.064426
ENSRNOG00000010466	4	7108462	7113919	-	Chpf2	protein_coding	525.93	424.62	0.807369	-0.3087	0.00209721	0.0647543
ENSRNOG00000016387	2	235850334	235852708	-	Rpl34	protein_coding	699.621	825.047	1.17928	0.237902	0.00211053	0.0649789
ENSRNOG00000024832	17	88215834	88651476	+	Gpr158	protein_coding	1389.09	1186.78	0.854357	-0.22709	0.00214343	0.0654293
ENSRNOG00000008992	5	143500441	143715546	+	Grik3	protein_coding	694.529	565.088	0.813628	-0.297558	0.00213697	0.0654293
ENSRNOG00000019550	7	142025815	142063212	-	Slc11a2	protein_coding	657.735	547.535	0.832455	-0.264555	0.0021392	0.0654293
ENSRNOG00000012036	1	236031988	236313858	+	Pcsk5	protein_coding	351.839	274.64	0.780585	-0.357373	0.00220231	0.0670364
ENSRNOG00000049920	17	53091933	53102342	-	Psma2	protein_coding	559.58	668.382	1.19444	0.256328	0.00222962	0.0676759
ENSRNOG00000052256	1	78800754	78812483	+	Dact3	protein_coding	1670.26	1975.33	1.18264	0.242017	0.00225901	0.0681826
ENSRNOG00000021023	1	89345429	89360733	-	Mag	protein_coding	1186.56	607.544	0.512023	-0.96572	0.00225789	0.0681826
ENSRNOG00000018320	1	187759480	187766709	-	Rps15a	protein_coding	995.268	1162.34	1.16787	0.223878	0.00227267	0.068403
ENSRNOG00000006490	8	63653266	63750531	-	Neo1	protein_coding	1036.02	888.001	0.85713	-0.222414	0.00227958	0.0684192
ENSRNOG00000003785	10	54406980	54467956	-	Usp43	protein_coding	124.305	81.1762	0.653043	-0.614751	0.00228649	0.0684355
ENSRNOG00000010488	16	1749191	1954614	+	Zmiz1	protein_coding	1813.85	1574.01	0.867769	-0.204617	0.00229514	0.0685036
ENSRNOG00000011726	3	2506896	2534663	-	Grin1	protein_coding	5478.22	4893.04	0.893181	-0.162975	0.00233505	0.0695017
ENSRNOG00000007392	4	56744561	56747656	+	Atp6v1f	protein_coding	1021.14	1188.12	1.16353	0.218507	0.00235644	0.0697829
ENSRNOG00000057626	5	165938576	166133491	-	Kif1b	protein_coding	13406.3	12040.8	0.898145	-0.15498	0.00235749	0.0697829
ENSRNOG00000008034	5	64326733	64412523	+	Tmeff1	protein_coding	799.985	673.139	0.84144	-0.249069	0.00238497	0.0704026
ENSRNOG00000018454	1	80612895	80617057	-	Apoe	protein_coding	12792.9	14796	1.15657	0.209857	0.00241723	0.0708776
ENSRNOG00000001611	11	47116886	47122095	-	Rpl24	protein_coding	1349	1550.42	1.14931	0.200765	0.00242085	0.0708776
ENSRNOG00000002115	11	30363280	30368862	+	Sod1	protein_coding	1426.52	1646.56	1.15425	0.206957	0.00242022	0.0708776
ENSRNOG00000052664	1	255479261	255532143	+	LOC100910717	protein_coding	2167.35	2476.15	1.14248	0.192166	0.0024569	0.0714036
ENSRNOG00000046547	17	18671044	18682876	-	Rbm24	protein_coding	105.49	149.724	1.41932	0.505197	0.00245413	0.0714036
ENSRNOG00000002013	11	61321459	61417842	+	Sidt1	protein_coding	1812.33	1587.46	0.875922	-0.191126	0.00245875	0.0714036
ENSRNOG00000008970	15	67555835	67645088	+	Pcdh17	protein_coding	1216.52	1042.35	0.856827	-0.222924	0.00246905	0.0715093
ENSRNOG00000001256	12	40266662	40332612	-	Atxn2	protein_coding	997.257	857	0.859357	-0.21867	0.00248254	0.0716207
ENSRNOG00000027341	10	20844899	21265026	-	Tenm2	protein_coding	2665.31	2287	0.858059	-0.220851	0.00248623	0.0716207
ENSRNOG00000031814	2	211078334	211156312	+	Sort1	protein_coding	8378.31	7484.72	0.893345	-0.162711	0.00250318	0.0719162
ENSRNOG00000006331	8	85259982	85285983	+	Elovl5	protein_coding	277.031	349.002	1.2598	0.333191	0.00251135	0.0719586
ENSRNOG00000011494	X	105402867	105405580	+	LOC100912182	protein_coding	496.872	601.118	1.2098	0.274774	0.00253531	0.0724519
ENSRNOG00000011494	X	105402867	105405580	+	LOC100912182	protein_coding	496.872	601.118	1.2098	0.274774	0.00253531	0.0724519
ENSRNOG00000017621	1	197771108	197778490	-	Spns1	protein_coding	676.272	564.694	0.835011	-0.260133	0.00256148	0.0730054
ENSRNOG00000001285	12	39553903	39603326	+	Atp2a2	protein_coding	11375.7	10201	0.89674	-0.157239	0.00259763	0.0732569
ENSRNOG00000026589	8	25582938	25669394	-	Dpy19l1	protein_coding	1171.86	985.991	0.841393	-0.249148	0.00258918	0.0732569
ENSRNOG00000021031	10	90376933	90383205	+	Grn	protein_coding	801.742	669.436	0.834976	-0.260193	0.00257842	0.0732569
ENSRNOG00000033617	10	87238723	87248632	-	Krt26	protein_coding	113.531	161.076	1.41878	0.50465	0.00260167	0.0732569
ENSRNOG00000012985	7	143924662	143929397	+	Pfdn5	protein_coding	626.736	759.724	1.21219	0.277618	0.00260439	0.0732569
ENSRNOG00000014644	8	98734295	98738446	-	Zic1	protein_coding	53.3579	84.9139	1.5914	0.6703	0.00261497	0.0733624
ENSRNOG00000011231	19	44908905	45117309	+	Cntnap4	protein_coding	785.771	665.723	0.847223	-0.239186	0.00264071	0.0738919
ENSRNOG00000001750	11	83858503	83867203	-	Chrd	protein_coding	213.293	159.693	0.748702	-0.417536	0.0027356	0.0760424
ENSRNOG00000001352	12	40713841	40822159	-	Hectd4	protein_coding	4077.36	3589.14	0.880261	-0.183996	0.00272926	0.0760424
ENSRNOG00000000123	5	147246037	147270957	+	Rnf19b	protein_coding	646.495	537.382	0.831223	-0.266693	0.0027388	0.0760424
ENSRNOG00000052620	10	34149717	34155198	+	Gnb2l1	protein_coding	2020.07	2314.9	1.14595	0.196541	0.00276297	0.0765157
ENSRNOG00000059660	6	133667975	133676907	+	AABR07065531.5	lincRNA	2599.36	1828.48	0.703436	-0.50751	0.0027938	0.0766296
ENSRNOG00000012568	3	79960301	80003032	-	Madd	protein_coding	3108.24	2753.8	0.885968	-0.174674	0.00280274	0.0766296
ENSRNOG00000015987	2	244258550	244370983	-	Rap1gds1	protein_coding	3279.64	2860.65	0.872244	-0.197197	0.00279404	0.0766296
ENSRNOG00000001148	12	46791528	46794797	-	Rplp0	protein_coding	2631.73	2969.44	1.12832	0.174176	0.0027992	0.0766296
ENSRNOG00000009057	2	116189862	116219750	-	Sec62	protein_coding	1221.87	1414.48	1.15763	0.211171	0.00278709	0.0766296
ENSRNOG00000025584	7	70364813	70377422	+	Agap2	protein_coding	11971.1	13134.5	1.09719	0.133808	0.00281161	0.076677
ENSRNOG00000028659	5	137190875	137238354	-	Szt2	protein_coding	579.038	471.214	0.813787	-0.297276	0.00282281	0.0767876
ENSRNOG00000013101	15	62197060	62200837	-	Pcdh8	protein_coding	824.754	967.228	1.17275	0.229891	0.00284534	0.0770105
ENSRNOG00000057620	X	157129987	157139291	-	Slc6a8	protein_coding	1025.08	875.969	0.854539	-0.226781	0.00284422	0.0770105
ENSRNOG00000011262	1	77869020	77893509	-	Gltscr1	protein_coding	255.714	196.506	0.768463	-0.379953	0.00288344	0.0778455
ENSRNOG00000039528	16	19304529	19308842	-	Fam32a	protein_coding	987.219	1136.7	1.15142	0.203413	0.00290772	0.0783045
ENSRNOG00000020426	1	82112449	82120902	-	Erf	protein_coding	451.332	553.525	1.22642	0.294458	0.00293963	0.0786687
ENSRNOG00000030355	7	117445144	117514612	+	Mroh1	protein_coding	770.849	649.192	0.842177	-0.247804	0.00294321	0.0786687
ENSRNOG00000047247	9	10603813	10645939	+	Ptprs	protein_coding	5640.89	5072.08	0.899163	-0.153345	0.00294027	0.0786687
ENSRNOG00000014323	2	218951141	218971886	+	Extl2	protein_coding	446.757	550.377	1.23194	0.30093	0.00296384	0.0788765
ENSRNOG00000001086	12	37984790	38023368	+	Vps37b	protein_coding	373.611	464.965	1.24452	0.315587	0.00296567	0.0788765
ENSRNOG00000045636	10	109987735	110005901	-	Fasn	protein_coding	4379.79	3892	0.888625	-0.170353	0.00301323	0.0799436
ENSRNOG00000019453	1	65660470	65664767	-	Rps5	protein_coding	1153.83	1355.06	1.1744	0.231929	0.00303075	0.0802103
ENSRNOG00000005530	6	108961994	108976489	-	Rps6kl1	protein_coding	536.869	443.035	0.825221	-0.277148	0.00304246	0.0803225
ENSRNOG00000021240	3	123434409	123567918	+	Atrn	protein_coding	4725.51	4238.81	0.897007	-0.156809	0.00305919	0.0805663
ENSRNOG00000011305	7	120393254	120403523	-	Sox10	protein_coding	320.284	235.499	0.735282	-0.443631	0.00307723	0.0808432
ENSRNOG00000021824	19	24747178	24750919	+	Dnajb1	protein_coding	536.266	647.015	1.20652	0.270849	0.00310947	0.0812566
ENSRNOG00000048036	16	21050243	21076707	+	Ncan	protein_coding	1766.88	1524.22	0.862665	-0.213128	0.00312322	0.0812566
ENSRNOG00000048676	3	11593655	11597410	+	Pip5kl1	protein_coding	113.005	75.6037	0.669028	-0.579861	0.00311574	0.0812566
ENSRNOG00000014226	5	172388598	172424081	-	Plch2	protein_coding	462.56	376.631	0.814232	-0.296489	0.00312317	0.0812566
ENSRNOG00000021182	2	198321142	198336913	+	Sv2a	protein_coding	6800.35	6054.68	0.890348	-0.167559	0.00317064	0.082291
ENSRNOG00000000257	19	38237965	38321528	-	Smpd3	protein_coding	899.281	759.853	0.844956	-0.243052	0.0031863	0.0824983
ENSRNOG00000011668	17	12261102	12276315	+	Nfil3	protein_coding	61.0352	93.9489	1.53926	0.622236	0.00322576	0.0833193
ENSRNOG00000023360	1	199412834	199426702	+	Fus	protein_coding	1662.56	1452.98	0.873944	-0.194387	0.00323586	0.0833796
ENSRNOG00000059408	1	101023106	101046208	-	Prr12	protein_coding	746.441	620.797	0.831675	-0.265907	0.00326889	0.0838286
ENSRNOG00000021338	1	226912612	226924244	-	Tmem132a	protein_coding	5344.81	4660.31	0.871933	-0.197711	0.00326837	0.0838286
ENSRNOG00000007636	4	50326442	50860756	-	Cadps2	protein_coding	1065.45	907.108	0.851387	-0.232114	0.00333383	0.0846857
ENSRNOG00000024112	14	2069409	2083370	+	Dgkq	protein_coding	620.877	518.41	0.834964	-0.260214	0.00331815	0.0846857
ENSRNOG00000004793	7	11081536	11091584	+	Ncln	protein_coding	895.415	766.054	0.855529	-0.225111	0.0033291	0.0846857
ENSRNOG00000004032	10	104320743	104343396	+	Tmem94	protein_coding	1704.96	1480.19	0.868172	-0.203947	0.00333007	0.0846857
ENSRNOG00000014633	7	117684339	117688187	-	Vps28	protein_coding	894.553	1044.65	1.16779	0.223785	0.00335666	0.0850645
ENSRNOG00000000421	20	4519474	4530126	-	Skiv2l	protein_coding	559.384	457.649	0.81813	-0.289598	0.00337589	0.0853504
ENSRNOG00000007329	6	93281408	93358840	+	Frmd6	protein_coding	342.731	425.614	1.24183	0.312468	0.00343169	0.0865576
ENSRNOG00000001239	20	13827153	13829622	+	Ddt	protein_coding	427.589	518.535	1.21269	0.278216	0.00345902	0.086941
ENSRNOG00000005248	14	104581190	104612597	-	Slc1a4	protein_coding	534.636	635.455	1.18857	0.249232	0.00346307	0.086941
ENSRNOG00000019106	1	143167362	143169657	-	Rps17	protein_coding	706.04	844.13	1.19558	0.257716	0.00348224	0.0872183
ENSRNOG00000045764	2	239415046	239439568	+	Cxxc4	protein_coding	395.052	309.198	0.782676	-0.353513	0.00350194	0.0873047
ENSRNOG00000028448	5	137255871	137260481	+	Elovl1	protein_coding	252.31	185.492	0.735175	-0.443841	0.00350002	0.0873047
ENSRNOG00000016398	5	166533181	166601684	+	Clstn1	protein_coding	19353	17218.8	0.889721	-0.168574	0.00358138	0.087459
ENSRNOG00000007657	5	79055521	79170765	+	Col27a1	protein_coding	154.586	106.513	0.689024	-0.537374	0.00354963	0.087459
ENSRNOG00000014496	10	62691953	62699723	-	Coro6	protein_coding	199.223	149.204	0.748933	-0.417092	0.00357537	0.087459
ENSRNOG00000033261	15	18399515	18415965	+	Fam107a	protein_coding	5070.67	5861.11	1.15588	0.208998	0.00353751	0.087459
ENSRNOG00000023753	1	53715693	53802658	-	Mllt4	protein_coding	1232.73	1053.77	0.854826	-0.226297	0.00353044	0.087459
ENSRNOG00000009243	8	47511719	47529689	-	Oaf	protein_coding	191.171	248.385	1.29928	0.377715	0.00354781	0.087459
ENSRNOG00000016670	17	85533057	85557939	-	Pip4k2a	protein_coding	612.119	507.737	0.829474	-0.269731	0.00356552	0.087459
ENSRNOG00000010477	3	11254026	11271872	+	Pomt1	protein_coding	257.092	198.114	0.770598	-0.37595	0.00352725	0.087459
ENSRNOG00000003769	13	44166306	44345735	-	Tmem163	protein_coding	242.208	183.259	0.756621	-0.402358	0.00356344	0.087459
ENSRNOG00000010365	X	1321315	1379198	+	Syn1	protein_coding	10234.6	9107.03	0.889824	-0.168408	0.00367775	0.0896088
ENSRNOG00000053288	20	20105047	20480623	+	Ank3	protein_coding	3493.23	3029.39	0.867218	-0.205533	0.00369515	0.0896498
ENSRNOG00000013408	9	45901741	46081880	+	Npas2	protein_coding	1565.56	1374.15	0.87774	-0.188134	0.00369613	0.0896498
ENSRNOG00000006770	7	14222101	14303055	-	Brd4	protein_coding	1397.66	1207.18	0.863714	-0.211374	0.00372472	0.0901399
ENSRNOG00000014548	17	22984844	23179701	+	Nedd9	protein_coding	166.152	221.955	1.33585	0.417761	0.00373984	0.0901516
ENSRNOG00000024535	10	59360765	59496422	+	Zzef1	protein_coding	1034.55	872.087	0.842959	-0.246466	0.00374198	0.0901516
ENSRNOG00000000054	16	19866022	19872774	-	Abhd8	protein_coding	2440.67	2733.92	1.12015	0.163694	0.00376689	0.0903466
ENSRNOG00000002053	14	14439082	14689554	-	Fras1	protein_coding	410.219	329.533	0.803311	-0.315969	0.00376374	0.0903466
ENSRNOG00000010263	2	115823538	115836846	-	Cldn11	protein_coding	1030.75	535.954	0.519964	-0.943517	0.00386312	0.0916466
ENSRNOG00000016640	9	91966460	92065402	-	Dner	protein_coding	830.359	686.686	0.826976	-0.274083	0.00386133	0.0916466
ENSRNOG00000020495	1	87927141	87937516	-	Eif3k	protein_coding	858.606	1019.93	1.18789	0.248407	0.00385705	0.0916466
ENSRNOG00000016545	10	14373679	14461160	+	Ift140	protein_coding	693.739	582.707	0.839951	-0.251624	0.00386374	0.0916466
ENSRNOG00000010771	10	13915214	13962008	+	Pkd1	protein_coding	1941.53	1676.24	0.863364	-0.21196	0.00383738	0.0916466
ENSRNOG00000018285	2	209838869	209852471	+	Kcna2	protein_coding	3838.85	3344.17	0.871138	-0.199028	0.0039103	0.0923433
ENSRNOG00000014874	14	81725513	81811142	+	Zfyve28	protein_coding	548.461	447.127	0.815239	-0.294704	0.00390194	0.0923433
ENSRNOG00000010210	2	139453774	139528162	-	Slc7a11	protein_coding	576.125	698.203	1.2119	0.277265	0.00393934	0.0928251
ENSRNOG00000000867	20	4993560	5008262	+	Vars	protein_coding	660.744	555.126	0.840153	-0.251275	0.00395048	0.0928838
ENSRNOG00000001575	11	27811957	27971359	-	Grik1	protein_coding	179.006	132.232	0.738702	-0.436935	0.00396939	0.0931247
ENSRNOG00000028746	1	267607418	267617387	+	Gsto1	protein_coding	648.351	770.579	1.18852	0.249168	0.00400368	0.0937244
ENSRNOG00000018712	18	56193978	56295869	+	Camk2a	protein_coding	11828.6	13260	1.12101	0.164798	0.00406378	0.0949246
ENSRNOG00000014576	8	115629583	115981910	-	Dock3	protein_coding	2953.5	2585.65	0.875453	-0.191898	0.00408175	0.0951374
ENSRNOG00000050197	6	42568220	42585652	+	Pdia6	protein_coding	1386.93	1563.93	1.12762	0.173279	0.00410792	0.0955403
ENSRNOG00000033100	3	143828611	143829156	+	LOC689130	processed_pseudogene	298.137	381.018	1.278	0.353886	0.00414187	0.0961219
ENSRNOG00000011156	4	157043925	157078130	-	Clstn3	protein_coding	6305.96	5527.05	0.87648	-0.190206	0.00418557	0.0969265
ENSRNOG00000034013	10	71536533	71719910	+	Acaca	protein_coding	1205.99	1057.67	0.877014	-0.189327	0.00419981	0.0970173
ENSRNOG00000001172	12	47103314	47138128	+	Rnf10	protein_coding	1811.03	2053.1	1.13366	0.180991	0.00421607	0.0970173
ENSRNOG00000021689	1	219406202	219412888	-	Rps6kb2	protein_coding	226.3	172.909	0.764073	-0.388218	0.00421657	0.0970173
ENSRNOG00000013451	2	62887267	62999572	+	Drosha	protein_coding	1212.88	1055.53	0.870273	-0.20046	0.00423648	0.0972671
ENSRNOG00000003687	13	60846308	60849094	-	Rgs2	protein_coding	411.834	514.932	1.25034	0.322317	0.00425637	0.0975153
ENSRNOG00000049880	9	117044533	117050371	+	Tmem200c	protein_coding	525.424	410.649	0.781558	-0.355575	0.00429061	0.0980907
ENSRNOG00000058733	7	104669672	104801045	-	Asap1	protein_coding	2094.63	1861.89	0.888885	-0.169931	0.00430644	0.098127
ENSRNOG00000001796	11	81972219	82163165	+	Dgkg	protein_coding	714.833	834.368	1.16722	0.223077	0.0043196	0.098127
ENSRNOG00000011203	15	106434177	106625837	+	Farp1	protein_coding	1090.43	933.468	0.856056	-0.224223	0.00431721	0.098127
ENSRNOG00000012561	16	79725643	79793619	-	Arhgef10	protein_coding	239.768	182.415	0.760798	-0.394416	0.00437485	0.0989809
ENSRNOG00000053706	16	59564419	59593852	+	Lonrf1	protein_coding	288.129	361.02	1.25298	0.325364	0.00437758	0.0989809
ENSRNOG00000002730	13	87966758	88003035	+	Rgs5	protein_coding	265.98	336.615	1.26557	0.339786	0.00438759	0.0989809
ENSRNOG00000000567	20	30339673	30406295	-	Unc5b	protein_coding	342.631	255.997	0.747152	-0.420526	0.00439403	0.0989809
ENSRNOG00000016866	9	49920854	49950093	-	Fhl2	protein_coding	579.905	485.219	0.836721	-0.257181	0.00441995	0.0993565
ENSRNOG00000013669	8	114300257	114350681	+	Pik3r4	protein_coding	686.367	580.784	0.846172	-0.240978	0.00447305	0.10034
ENSRNOG00000011015	1	8310577	8333885	+	Hivep2	protein_coding	3412.61	2985.84	0.874943	-0.192739	0.00449259	0.100383
ENSRNOG00000014744	6	137824213	137887418	+	Pacs2	protein_coding	1329.62	1143.75	0.860209	-0.21724	0.00449364	0.100383
ENSRNOG00000032946	1	264776398	264794938	-	Pdzd7	protein_coding	84.4244	53.9366	0.638875	-0.646395	0.00451896	0.100739
ENSRNOG00000027742	3	5624506	5654910	+	Adamtsl2	protein_coding	104.641	69.9153	0.668144	-0.581768	0.00453393	0.100799
ENSRNOG00000047246	19	39077580	39087880	-	Chtf8	protein_coding	539.492	640.379	1.187	0.247324	0.00454043	0.100799
ENSRNOG00000015420	3	11823785	11885417	-	Stxbp1	protein_coding	12817.9	11674.1	0.910767	-0.134846	0.00454984	0.1008
ENSRNOG00000015999	7	12401207	12405022	-	Cirbp	protein_coding	410.272	331.366	0.807673	-0.308156	0.00462558	0.10164
ENSRNOG00000013090	17	13391467	13393243	-	Gadd45g	protein_coding	64.8621	101.325	1.56216	0.643541	0.00462303	0.10164
ENSRNOG00000007114	6	76174452	76205426	+	Psma6	protein_coding	740.104	861.685	1.16428	0.219432	0.00459723	0.10164
ENSRNOG00000029980	8	52985313	53146953	-	Zbtb16	protein_coding	471.947	387.946	0.822013	-0.282767	0.00461798	0.10164
ENSRNOG00000010744	19	61332351	61485858	+	Nrp1	protein_coding	484.464	401.834	0.82944	-0.26979	0.00471613	0.103207
ENSRNOG00000000033	13	49132667	49169918	-	Tmcc2	protein_coding	1800.32	2022.4	1.12336	0.167818	0.00471335	0.103207
ENSRNOG00000018870	2	187396349	187401786	-	Hapln2	protein_coding	121.26	82.1541	0.677504	-0.561699	0.0047447	0.103411
ENSRNOG00000043348	X	123705235	123708211	-	Rpl39	protein_coding	334.037	409.518	1.22596	0.293917	0.00474468	0.103411
ENSRNOG00000043348	X	123705235	123708211	-	Rpl39	protein_coding	334.037	409.518	1.22596	0.293917	0.00474468	0.103411
ENSRNOG00000043348	X	123705235	123708211	-	Rpl39	protein_coding	334.037	409.518	1.22596	0.293917	0.00474468	0.103411
ENSRNOG00000043348	X	123705235	123708211	-	Rpl39	protein_coding	334.037	409.518	1.22596	0.293917	0.00474468	0.103411
ENSRNOG00000043348	X	123705235	123708211	-	Rpl39	protein_coding	334.037	409.518	1.22596	0.293917	0.00474468	0.103411
ENSRNOG00000043348	X	123705235	123708211	-	Rpl39	protein_coding	334.037	409.518	1.22596	0.293917	0.00474468	0.103411
ENSRNOG00000043348	X	123705235	123708211	-	Rpl39	protein_coding	334.037	409.518	1.22596	0.293917	0.00474468	0.103411
ENSRNOG00000057569	1	225184939	225215015	+	Ahnak	protein_coding	211.442	289.328	1.36836	0.452444	0.00477801	0.103711
ENSRNOG00000004430	10	109243039	109267500	-	Cep131	protein_coding	464.462	381.293	0.820934	-0.284661	0.00478741	0.103711
ENSRNOG00000020185	8	117358787	117366096	-	Wdr6	protein_coding	1870.01	1660.32	0.887868	-0.171582	0.00478186	0.103711
ENSRNOG00000001170	12	47024442	47027495	+	Cox6a1	protein_coding	2674.8	2990.21	1.11792	0.160816	0.00482447	0.103886
ENSRNOG00000050996	15	58016238	58019442	+	Kctd4	protein_coding	209.646	267.474	1.27584	0.351444	0.00481828	0.103886
ENSRNOG00000050655	20	28920616	28971966	+	P4ha1	protein_coding	465.122	557.294	1.19817	0.260828	0.00481138	0.103886
ENSRNOG00000015205	18	81694808	81726821	+	Cyb5a	protein_coding	230.823	293.674	1.27229	0.347427	0.00487571	0.10457
ENSRNOG00000005908	4	21862313	21902762	+	Dmtf1	protein_coding	680.525	797.908	1.17249	0.229573	0.00487369	0.10457
ENSRNOG00000015860	1	80063049	80073223	-	Gipr	protein_coding	101.312	66.8022	0.659368	-0.600843	0.00491093	0.104907
ENSRNOG00000010598	14	75852060	75882693	+	Hs3st1	protein_coding	173.158	124.064	0.716478	-0.481005	0.00490772	0.104907
ENSRNOG00000000463	20	3830164	3859018	+	Col11a2	protein_coding	497.876	397.073	0.797534	-0.326383	0.00494364	0.105396
ENSRNOG00000022386	1	260324028	260341723	-	Opalin	protein_coding	810.061	451.135	0.556914	-0.844473	0.00496307	0.1056
ENSRNOG00000013360	8	23014956	23026503	+	Prkcsh	protein_coding	1303.98	1138.69	0.87324	-0.195549	0.00509637	0.108222
ENSRNOG00000027194	10	61703839	61745097	-	Sgsm2	protein_coding	1677.87	1880.83	1.12096	0.164739	0.00510673	0.108228
ENSRNOG00000030963	5	115649046	115650340	+	AABR07049305.1	protein_coding	796.414	920.562	1.15588	0.208995	0.00523196	0.109586
ENSRNOG00000046333	1	277853875	278042312	-	Ablim1	protein_coding	730.377	621.273	0.85062	-0.233413	0.00521385	0.109586
ENSRNOG00000017746	19	37668133	37672729	+	Pard6a	protein_coding	121.033	164.472	1.3589	0.442441	0.0052235	0.109586
ENSRNOG00000010302	10	70627401	70637332	+	Rasl10b	protein_coding	899.953	1031.78	1.14648	0.197217	0.00521773	0.109586
ENSRNOG00000010302	10	70627401	70637332	+	Rasl10b	protein_coding	899.953	1031.78	1.14648	0.197217	0.00521773	0.109586
ENSRNOG00000015461	9	85560863	85626094	-	Serpine2	protein_coding	1623.78	1445.22	0.890035	-0.168066	0.00520317	0.109586
ENSRNOG00000061544	20	29655226	29677926	+	Spock2	protein_coding	3250.43	2937.37	0.903686	-0.146106	0.00518505	0.109586
ENSRNOG00000004252	6	10151729	10236695	+	Eif3h	protein_coding	286.482	356.08	1.24294	0.313759	0.00531674	0.111145
ENSRNOG00000013147	16	6112150	6405117	-	Cacna1d	protein_coding	1021.24	867.526	0.84948	-0.235348	0.00536996	0.111292
ENSRNOG00000008534	3	148417993	148428494	-	Dusp15	protein_coding	286.309	221.821	0.77476	-0.368179	0.00535112	0.111292
ENSRNOG00000039807	17	9595761	9628413	+	Fam193b	protein_coding	486.152	402.946	0.828848	-0.270821	0.0053756	0.111292
ENSRNOG00000011700	9	114846095	115555261	-	Ptprm	protein_coding	706.865	599.619	0.848279	-0.237388	0.00536138	0.111292
ENSRNOG00000017940	5	167331035	167664505	+	Rere	protein_coding	1241.21	1093.28	0.880819	-0.183083	0.00535737	0.111292
ENSRNOG00000018412	14	83347552	83412375	-	Sfi1	protein_coding	248.372	194.06	0.781326	-0.356003	0.00543887	0.11217
ENSRNOG00000019791	19	58236214	58399816	-	Sipa1l2	protein_coding	642.004	535.296	0.833789	-0.262246	0.00543323	0.11217
ENSRNOG00000003626	10	103967312	103972668	-	Atp5h	protein_coding	1385.65	1586.32	1.14481	0.195113	0.00550698	0.113285
ENSRNOG00000040384	6	133682957	133683050	+	Mir770	miRNA	566.866	382.307	0.674422	-0.568276	0.00551399	0.113285
ENSRNOG00000012701	1	15620653	15748203	+	Map7	protein_coding	593.84	493.548	0.831113	-0.266884	0.00553346	0.113399
ENSRNOG00000007332	7	119760888	119768082	-	Sstr3	protein_coding	253.357	195.904	0.773232	-0.371027	0.00554066	0.113399
ENSRNOG00000014530	1	104576589	104941552	+	Nav2	protein_coding	611.346	507.289	0.82979	-0.269181	0.00555822	0.113542
ENSRNOG00000017893	10	14599197	14613878	-	Baiap3	protein_coding	220.721	165.329	0.749039	-0.416887	0.00556918	0.11355
ENSRNOG00000022919	1	90542096	90685257	-	Chst8	protein_coding	169.884	124.854	0.734938	-0.444305	0.00564376	0.114636
ENSRNOG00000013508	9	46086984	46090997	+	Rpl31	protein_coding	808.053	940.663	1.16411	0.219228	0.00563668	0.114636
ENSRNOG00000009080	6	102032276	102047758	-	Atp6v1d	protein_coding	2783.82	3078.07	1.1057	0.14496	0.00569047	0.115149
ENSRNOG00000015335	19	55917736	55919996	+	LOC100359922	protein_coding	1227.37	1446.68	1.17869	0.237185	0.0056811	0.115149
ENSRNOG00000015335	19	55917736	55919996	+	LOC100359922	protein_coding	1227.37	1446.68	1.17869	0.237185	0.0056811	0.115149
ENSRNOG00000012531	5	155022493	155204456	-	Ephb2	protein_coding	194.718	144.608	0.742653	-0.429239	0.00578086	0.116104
ENSRNOG00000002667	13	70566643	70626252	-	Lamc2	protein_coding	182.855	135.133	0.739015	-0.436324	0.00574856	0.116104
ENSRNOG00000003348	10	46330368	46332172	-	Rasd1	protein_coding	206.357	270.165	1.30921	0.388697	0.00576523	0.116104
ENSRNOG00000027938	17	55670331	55709740	-	RGD1562037	protein_coding	1144.13	985.678	0.861505	-0.215068	0.00577762	0.116104
ENSRNOG00000023458	X	131340045	131343853	-	Dcaf12l1	protein_coding	717.672	609.871	0.849791	-0.23482	0.00585101	0.116407
ENSRNOG00000007281	4	56711049	56738791	+	Flnc	protein_coding	79.5787	48.3427	0.607483	-0.719084	0.00581593	0.116407
ENSRNOG00000003841	13	110920737	111232269	+	Kcnh1	protein_coding	997.044	858.486	0.861031	-0.215864	0.00584065	0.116407
ENSRNOG00000009364	7	98813040	98819452	+	Ndufb9	protein_coding	1218.31	1404.94	1.15319	0.20563	0.00586096	0.116407
ENSRNOG00000021035	1	101701975	101703550	+	Rpl18	protein_coding	973.752	1124.28	1.15459	0.207375	0.00585142	0.116407
ENSRNOG00000025612	12	50090464	50241995	+	Sez6l	protein_coding	2969.42	2642.97	0.89006	-0.168025	0.00584823	0.116407
ENSRNOG00000002721	11	65960277	65966898	+	Ndufb4	protein_coding	687.337	800.173	1.16416	0.219295	0.00598394	0.118561
ENSRNOG00000032590	12	51385763	51702730	-	Ttc28	protein_coding	216.394	165.373	0.764223	-0.387935	0.0059915	0.118561
ENSRNOG00000003848	X	71174699	71197812	+	Med12	protein_coding	374.31	305.051	0.814971	-0.29518	0.00602884	0.119081
ENSRNOG00000011026	6	110901940	110904288	-	Irf2bpl	protein_coding	601.076	706.016	1.17459	0.232153	0.00608037	0.119878
ENSRNOG00000003278	10	91303428	91353601	-	Map3k14	protein_coding	114.768	157.264	1.37027	0.454465	0.00616021	0.121008
ENSRNOG00000022980	8	55028125	55037604	-	Sdhd	protein_coding	915.351	1051.99	1.14927	0.200723	0.00615714	0.121008
ENSRNOG00000019090	2	187668796	187693610	+	Cct3	protein_coding	1474.04	1671.08	1.13367	0.181005	0.00626747	0.122862
ENSRNOG00000022428	1	222344713	222350173	-	Flrt1	protein_coding	528.064	434.735	0.823261	-0.280578	0.00627747	0.122862
ENSRNOG00000000490	20	7215774	7219548	-	Rps10	protein_coding	526.86	625.23	1.18671	0.246967	0.00629446	0.122971
ENSRNOG00000009046	5	169161412	169167831	-	Phf13	protein_coding	200.274	254.514	1.27083	0.345771	0.00631694	0.123186
ENSRNOG00000017766	8	72405748	72460240	+	Car12	protein_coding	114.536	161.853	1.41312	0.498885	0.00635261	0.123657
ENSRNOG00000002419	X	107496072	107511348	+	Plp1	protein_coding	13377.6	7868.15	0.588157	-0.765726	0.00639295	0.124217
ENSRNOG00000003300	13	50913180	50916982	-	Btg2	protein_coding	136.418	183.912	1.34814	0.430974	0.00644854	0.125071
ENSRNOG00000003232	10	103713045	103730145	+	Slc9a3r1	protein_coding	236.372	297.691	1.25942	0.332756	0.00648783	0.125607
ENSRNOG00000004060	6	124217241	124225292	+	Calm3	protein_coding	19185.9	20787.4	1.08347	0.115663	0.00656067	0.126788
ENSRNOG00000017123	3	114087287	114093309	+	B2m	protein_coding	1244.21	1446.44	1.16254	0.217279	0.00660197	0.127096
ENSRNOG00000016281	16	83522162	83632153	+	Col4a1	protein_coding	307.131	246.236	0.80173	-0.318812	0.00662387	0.127096
ENSRNOG00000002671	10	81648216	81653717	-	Nme2	protein_coding	1272.56	1438.55	1.13044	0.176882	0.00661351	0.127096
ENSRNOG00000004810	3	128155069	128419545	+	Plcb1	protein_coding	2242.07	1970.2	0.878742	-0.186488	0.00658862	0.127096
ENSRNOG00000008822	3	147042944	147062724	+	Fkbp1a	protein_coding	5078.57	5569.81	1.09673	0.133205	0.00673359	0.128743
ENSRNOG00000017418	1	164435878	164441167	-	Rps3	protein_coding	2059	2360.73	1.14654	0.197288	0.00673369	0.128743
ENSRNOG00000005437	7	73256508	73270308	-	Hrsp12	protein_coding	158.402	207.771	1.31167	0.391408	0.00675445	0.128857
ENSRNOG00000012818	10	66347358	66482150	-	Ksr1	protein_coding	226.423	175.484	0.775027	-0.367681	0.00676365	0.128857
ENSRNOG00000017127	1	72619282	72621519	-	Rpl28	protein_coding	1381.42	1590.11	1.15106	0.202969	0.00678552	0.129045
ENSRNOG00000047450	4	172942020	173005634	+	Lmo3	protein_coding	918.485	778.514	0.847607	-0.238533	0.0068728	0.130474
ENSRNOG00000060348	11	61661724	61672850	+	Zdhhc23	protein_coding	233.294	181.759	0.779096	-0.360126	0.00701487	0.132936
ENSRNOG00000020742	1	221019500	221041401	-	Pcnxl3	protein_coding	864.226	748.825	0.866469	-0.206779	0.00707886	0.133759
ENSRNOG00000018452	16	20056765	20097287	-	Unc13a	protein_coding	2533.04	2262.92	0.893361	-0.162685	0.0070832	0.133759
ENSRNOG00000018958	19	11324698	11326139	-	Mt3	protein_coding	1641.68	1868.29	1.13803	0.186543	0.0071069	0.133971
ENSRNOG00000026048	1	265904566	266033156	+	Gbf1	protein_coding	1394.75	1232.53	0.883696	-0.178378	0.00721567	0.135477
ENSRNOG00000005723	5	64928620	65073012	-	Grin3a	protein_coding	286.273	225.518	0.787773	-0.344148	0.00722461	0.135477
ENSRNOG00000011475	10	85460059	85517683	-	Srcin1	protein_coding	2782.91	2492.95	0.895807	-0.15874	0.00721113	0.135477
ENSRNOG00000018159	4	118538777	118595580	-	Anxa4	protein_coding	435.021	361.003	0.829854	-0.269071	0.00725337	0.135543
ENSRNOG00000017163	17	68511064	68559471	-	Pfkp	protein_coding	5714.75	5219.89	0.913407	-0.130671	0.00724866	0.135543
ENSRNOG00000043114	4	7835949	7842789	+	Tomm7	protein_coding	373.882	453.96	1.21418	0.27998	0.00732157	0.13658
ENSRNOG00000053766	14	86922223	86939719	+	Ramp3	protein_coding	303.353	243.023	0.801123	-0.319904	0.00734827	0.136604
ENSRNOG00000045843	5	58855773	58882096	+	Rusc2	protein_coding	1807.69	1584.59	0.876585	-0.190033	0.00734307	0.136604
ENSRNOG00000010650	6	102215603	102262417	+	Plekhh1	protein_coding	242.704	176.72	0.728132	-0.457727	0.00736628	0.136702
ENSRNOG00000024186	9	69953440	69956160	+	Eef1b2	protein_coding	999.131	1137	1.13799	0.186482	0.00739454	0.13699
ENSRNOG00000010440	18	62805410	62944630	+	Gnal	protein_coding	277.294	353.09	1.27334	0.34862	0.00745929	0.137952
ENSRNOG00000013718	1	114453054	114653793	+	Herc2	protein_coding	4671.51	4124.92	0.882996	-0.179522	0.00751206	0.138689
ENSRNOG00000016411	1	22758212	22760370	+	Rps12	protein_coding	1027.22	1191.2	1.15963	0.21367	0.00752767	0.138739
ENSRNOG00000006787	5	126164674	126191206	+	Dhcr24	protein_coding	2423.2	2108.21	0.870013	-0.200891	0.00762883	0.140123
ENSRNOG00000000043	14	2042411	2056762	-	Idua	protein_coding	339.798	270.96	0.797416	-0.326596	0.00762702	0.140123
ENSRNOG00000028021	3	4341249	4341771	-	Rps13	protein_coding	445.818	527.789	1.18387	0.243507	0.00768094	0.140839
ENSRNOG00000028021	3	4341249	4341771	-	Rps13	protein_coding	445.818	527.789	1.18387	0.243507	0.00768094	0.140839
ENSRNOG00000019990	16	20672374	20674846	+	RGD1566239	protein_coding	214.022	275.124	1.2855	0.362326	0.00772648	0.141433
ENSRNOG00000004781	14	78266931	78308933	-	Crmp1	protein_coding	2433.86	2177.46	0.894652	-0.160601	0.00773968	0.141433
ENSRNOG00000004143	13	51240911	51260228	+	Adipor1	protein_coding	609.99	710.404	1.16462	0.219855	0.00777332	0.141567
ENSRNOG00000006623	3	46327383	46361092	-	Cd302	protein_coding	111.54	153.942	1.38015	0.464829	0.00776281	0.141567
ENSRNOG00000009411	4	84194347	84454500	+	Chn2	protein_coding	308.375	246.981	0.800911	-0.320286	0.00785232	0.141721
ENSRNOG00000059705	17	46353330	46794845	-	Elmo1	protein_coding	618.936	515.81	0.833382	-0.262951	0.00786095	0.141721
ENSRNOG00000026963	7	27226569	27240533	-	Hsp90b1	protein_coding	3728.09	4074.73	1.09298	0.128271	0.00783082	0.141721
ENSRNOG00000002339	13	102808253	102942863	-	Mark1	protein_coding	1142.73	1003.24	0.877933	-0.187817	0.00784114	0.141721
ENSRNOG00000011407	16	59666775	59721227	-	Pragmin	protein_coding	684.047	801.29	1.1714	0.22823	0.00784456	0.141721
ENSRNOG00000057729	4	57204944	57246675	+	Strip2	protein_coding	64.8292	96.4403	1.48761	0.572992	0.00780535	0.141721
ENSRNOG00000026243	1	100896947	100926335	-	Ap2a1	protein_coding	2948.97	2628.95	0.891481	-0.165724	0.00791444	0.142046
ENSRNOG00000013064	5	127404450	127476641	+	Lrp8	protein_coding	953.547	814.666	0.854353	-0.227095	0.00791864	0.142046
ENSRNOG00000006426	7	50084060	50638798	-	Syt1	protein_coding	22281.5	20417.7	0.916351	-0.126028	0.00791488	0.142046
ENSRNOG00000033473	9	10441259	10441834	-	Rpl36	protein_coding	378.464	457.168	1.20795	0.272566	0.00793848	0.142165
ENSRNOG00000021177	1	222466575	222468896	-	Cox8a	protein_coding	1766.15	2003.71	1.1345	0.182061	0.00805381	0.143885
ENSRNOG00000011752	2	185393441	185429630	+	Sh3d19	protein_coding	106.056	72.5226	0.683811	-0.54833	0.0080613	0.143885
ENSRNOG00000013428	4	65736585	65818521	-	Atp6v0a4	protein_coding	81.8163	52.7997	0.645344	-0.63186	0.00811281	0.143983
ENSRNOG00000029663	X	55439578	56765893	-	Il1rapl1	protein_coding	58.773	90.4517	1.539	0.621995	0.00811587	0.143983
ENSRNOG00000002983	19	25821780	25914696	-	Nfix	protein_coding	761.219	656.218	0.862062	-0.214136	0.0081204	0.143983
ENSRNOG00000003243	10	62273800	62287189	-	Wdr81	protein_coding	405.658	336.122	0.828585	-0.271279	0.00810408	0.143983
ENSRNOG00000000851	20	5125349	5138084	+	Bag6	protein_coding	2372.08	2117.93	0.892855	-0.163502	0.00818592	0.144906
ENSRNOG00000007349	14	84876781	84913617	+	Ascc2	protein_coding	164.573	122.038	0.741539	-0.431405	0.00827839	0.146302
ENSRNOG00000005825	7	60335969	60341264	-	Lyz2	protein_coding	355.425	429.231	1.20766	0.272212	0.00831055	0.146491
ENSRNOG00000050806	1	103115216	103128743	-	Spty2d1	protein_coding	126.881	173.317	1.36598	0.449937	0.00831638	0.146491
ENSRNOG00000030118	X	65226748	65295810	+	Msn	protein_coding	177.106	230.282	1.30025	0.378788	0.00834221	0.146705
ENSRNOG00000021061	1	221710670	221725656	+	Map4k2	protein_coding	566.971	474.766	0.837373	-0.256058	0.00835787	0.146741
ENSRNOG00000006841	7	29492016	29701721	-	Ano4	protein_coding	307.74	249.245	0.80992	-0.30415	0.0084072	0.147339
ENSRNOG00000016550	2	186116624	186245771	-	Dclk2	protein_coding	833.286	723.916	0.868748	-0.20299	0.00841936	0.147339
ENSRNOG00000006747	19	25246913	25261946	-	Cc2d1a	protein_coding	864.7	755.633	0.873868	-0.194513	0.00846186	0.147602
ENSRNOG00000034078	1	274030978	274090071	+	Mxi1	protein_coding	965.983	1101.59	1.14038	0.189516	0.00845784	0.147602
ENSRNOG00000014997	1	48176106	48264477	+	Igf2r	protein_coding	737.211	630.894	0.855784	-0.224681	0.00848304	0.147731
ENSRNOG00000006784	4	113738226	113764532	-	Sema4f	protein_coding	1059.1	930.6	0.878674	-0.186601	0.00854293	0.148534
ENSRNOG00000010050	3	112428395	112659140	+	Stard9	protein_coding	281.706	222.779	0.790821	-0.338577	0.00859105	0.149129
ENSRNOG00000021528	8	116318963	116322181	+	Tusc2	protein_coding	878.223	1010.82	1.15099	0.202874	0.00865855	0.150058
ENSRNOG00000016043	18	6765945	6782996	-	Aqp4	protein_coding	2123.84	2451.47	1.15426	0.206972	0.00874801	0.151365
ENSRNOG00000007271	6	105459706	105518748	-	Map3k9	protein_coding	894.292	753.068	0.842082	-0.247967	0.00880362	0.152082
ENSRNOG00000027503	8	48727618	48729580	+	Rps25	protein_coding	835.667	961.19	1.15021	0.201893	0.00889211	0.153364
ENSRNOG00000001811	4	180887182	180908198	+	Fgfr1op2	protein_coding	596.669	693.388	1.1621	0.216731	0.00893865	0.15392
ENSRNOG00000014746	8	107875991	107916294	+	Dzip1l	protein_coding	293.997	235.398	0.800682	-0.320698	0.00898007	0.154385
ENSRNOG00000004519	6	129449449	129509720	-	Atg2b	protein_coding	1449.92	1282.53	0.884553	-0.17698	0.00909624	0.155397
ENSRNOG00000036859	1	164380577	164418593	+	Gdpd5	protein_coding	248.225	191.645	0.77206	-0.373215	0.00907423	0.155397
ENSRNOG00000022694	5	169244778	169288309	+	Plekhg5	protein_coding	780.26	676.062	0.866458	-0.206799	0.00906704	0.155397
ENSRNOG00000016961	2	189572176	189573280	-	Rps27	protein_coding	859.131	991.98	1.15463	0.207433	0.00909674	0.155397
ENSRNOG00000016961	2	189572176	189573280	-	Rps27	protein_coding	859.131	991.98	1.15463	0.207433	0.00909674	0.155397
ENSRNOG00000028834	10	56339284	56365084	-	Polr2a	protein_coding	1246.87	1090.56	0.874641	-0.193237	0.00911842	0.15552
ENSRNOG00000018630	4	157676595	157679962	-	Gapdh	protein_coding	20216.2	22145.9	1.09546	0.131531	0.00914952	0.155803
ENSRNOG00000019973	1	266287017	266333105	-	Arl3	protein_coding	1087.18	1227.86	1.12939	0.175546	0.00921873	0.156733
ENSRNOG00000054757	7	140270692	140291620	-	Adcy6	protein_coding	494.754	416.456	0.841743	-0.248548	0.00932499	0.156866
ENSRNOG00000008088	3	131351587	131357929	+	Btbd3	protein_coding	926.181	1079.32	1.16534	0.220752	0.00927157	0.156866
ENSRNOG00000056697	2	155718359	156009526	+	Kcnab1	protein_coding	1168.06	1030.53	0.882257	-0.180729	0.00928742	0.156866
ENSRNOG00000010038	10	94445877	94451811	+	Psmc5	protein_coding	1947.25	2173.76	1.11632	0.158756	0.00934337	0.156866
ENSRNOG00000054626	5	136020941	136023511	-	Rps8	protein_coding	2014.78	2309.63	1.14634	0.197037	0.00929165	0.156866
ENSRNOG00000017212	5	166913735	166926636	-	Spsb1	protein_coding	192.973	147.846	0.766149	-0.384303	0.00931043	0.156866
ENSRNOG00000042160	2	211348762	211352540	-	Tmem167b	protein_coding	130.979	173.627	1.32561	0.406653	0.00928341	0.156866
ENSRNOG00000007869	10	58332588	58371196	+	Wscd1	protein_coding	1086.38	910.082	0.837716	-0.255466	0.00933861	0.156866
ENSRNOG00000010526	3	22058400	22500765	-	Dennd1a	protein_coding	796.366	693.56	0.870906	-0.199411	0.00939662	0.157024
ENSRNOG00000055293	7	59326518	59425718	+	Ptprb	protein_coding	272.709	210.809	0.77302	-0.371422	0.00938013	0.157024
ENSRNOG00000007202	4	19224310	19413484	-	Sema3d	protein_coding	132.131	92.7832	0.702204	-0.510038	0.0093913	0.157024
ENSRNOG00000033837	2	66940057	67078784	+	Cdh9	protein_coding	161.473	211.541	1.31007	0.389643	0.00942105	0.157188
ENSRNOG00000008471	13	52976507	53023103	+	Kif21b	protein_coding	1217.31	1035.41	0.850569	-0.233499	0.00945375	0.157489
ENSRNOG00000022635	1	156552328	157269747	+	Dlg2	protein_coding	1705	1938.82	1.13714	0.185407	0.00948602	0.157728
ENSRNOG00000018194	5	153675624	153708170	-	Srrm1	protein_coding	997.377	875.437	0.877739	-0.188136	0.00949746	0.157728
ENSRNOG00000008137	13	48893412	48927483	-	Cdk18	protein_coding	569.707	474.571	0.833008	-0.263598	0.00960619	0.15928
ENSRNOG00000004812	3	116899878	116958050	+	Sema6d	protein_coding	694.002	591.42	0.852187	-0.230758	0.00962053	0.15928
ENSRNOG00000019122	3	3856218	3890758	-	Sec16a	protein_coding	1306.86	1147.92	0.878376	-0.18709	0.00964985	0.159519
ENSRNOG00000009683	5	19471664	19498485	+	Sdcbp	protein_coding	2896.1	3188.43	1.10094	0.138738	0.00972344	0.160489
ENSRNOG00000027707	6	104017607	104051446	+	Exd2	protein_coding	997.474	1130.24	1.1331	0.180273	0.00976675	0.160957
ENSRNOG00000000931	12	30740520	30811054	-	Sfswap	protein_coding	600.534	504.178	0.83955	-0.252312	0.00981934	0.161576
ENSRNOG00000013257	9	60457215	60672246	-	Hecw2	protein_coding	732.853	620.364	0.846506	-0.240408	0.00989671	0.1626
ENSRNOG00000033146	1	77541359	77541814	+	LOC103690015	protein_coding	301.25	370.222	1.22895	0.297429	0.00992709	0.16285
ENSRNOG00000018212	7	11992543	11998973	+	Abhd17a	protein_coding	837.344	970.864	1.15946	0.213449	0.0100182	0.163549
ENSRNOG00000020862	8	118628777	118651238	-	Ptpn23	protein_coding	599.859	511.255	0.852293	-0.230578	0.00998856	0.163549
ENSRNOG00000009255	8	22625874	22628843	+	RGD1309188	protein_coding	709.27	817.3	1.15231	0.204531	0.0100458	0.163549
ENSRNOG00000033378	8	116829050	116856548	-	Rnf123	protein_coding	1527.99	1364.13	0.892765	-0.163648	0.0100438	0.163549
ENSRNOG00000002682	10	43744731	43752242	+	Zfp692	protein_coding	251.526	199.463	0.793011	-0.334587	0.0100327	0.163549
ENSRNOG00000030269	4	145703046	146016325	-	Atp2b2	protein_coding	5695.38	5070.2	0.890229	-0.167752	0.0100928	0.163818
ENSRNOG00000019582	1	40529045	40719391	+	Mthfd1l	protein_coding	356.513	427.588	1.19936	0.262266	0.0100886	0.163818
ENSRNOG00000021317	7	60109974	60122805	-	Cct2	protein_coding	1427.95	1600.28	1.12068	0.164375	0.0102876	0.165314
ENSRNOG00000025115	8	57886168	57962708	+	Exph5	protein_coding	633.166	740.865	1.1701	0.226628	0.0102927	0.165314
ENSRNOG00000012016	18	3616878	3662656	-	Npc1	protein_coding	367.744	299.379	0.814096	-0.296728	0.0102391	0.165314
ENSRNOG00000011138	8	115131367	115133401	+	Rpl29	protein_coding	1708.01	1923.94	1.12642	0.171746	0.0102434	0.165314
ENSRNOG00000050563	2	62022567	62034628	-	Sub1	protein_coding	1368.16	1540.07	1.12565	0.170762	0.0102634	0.165314
ENSRNOG00000004303	7	23544215	23594133	-	Timp3	protein_coding	293.342	356.045	1.21376	0.279478	0.0102523	0.165314
ENSRNOG00000029071	2	247248407	247397483	+	Unc5c	protein_coding	419.695	344.041	0.81974	-0.286761	0.0102697	0.165314
ENSRNOG00000003670	10	104086002	104097812	-	AABR07030781.1	protein_coding	615.861	710.841	1.15422	0.206922	0.0103475	0.16591
ENSRNOG00000006559	7	14324104	14351918	-	Akap8	protein_coding	430.624	351.582	0.816448	-0.292568	0.0103761	0.16591
ENSRNOG00000015703	3	113423693	113424846	+	Hypk	protein_coding	283.125	348.196	1.22983	0.298459	0.0103619	0.16591
ENSRNOG00000018644	18	56305735	56331991	-	Slc6a7	protein_coding	1322.43	1157.98	0.875645	-0.191582	0.010459	0.166738
ENSRNOG00000010896	3	2480232	2487710	+	Tprn	protein_coding	173.889	127.076	0.73079	-0.452471	0.010455	0.166738
ENSRNOG00000058545	X	156873849	156888761	+	Arhgap4	protein_coding	95.9214	66.612	0.694444	-0.526069	0.0105063	0.167214
ENSRNOG00000013742	19	12481540	12942963	-	Large	protein_coding	3467.65	3120.51	0.899892	-0.152177	0.0105355	0.167214
ENSRNOG00000001426	12	23514981	23535968	+	Prkrip1	protein_coding	260.894	319.743	1.22557	0.293449	0.0105252	0.167214
ENSRNOG00000033940	2	256609787	256724641	+	Adgrl4	protein_coding	73.6522	104.965	1.42515	0.511114	0.0105639	0.167418
ENSRNOG00000008223	5	49311030	49333056	+	Cnr1	protein_coding	2973.33	2700.82	0.90835	-0.13868	0.0106088	0.167881
ENSRNOG00000014369	3	8363937	8376858	+	Slc27a4	protein_coding	951.52	825.4	0.867454	-0.205141	0.010626	0.167906
ENSRNOG00000028014	11	31847745	31892531	-	Cryzl1	protein_coding	652.195	754.714	1.15719	0.210627	0.0106689	0.16809
ENSRNOG00000011358	3	94352969	94419048	-	Hipk3	protein_coding	806.787	919.62	1.13985	0.188849	0.0106602	0.16809
ENSRNOG00000020021	1	214927172	214947624	+	Brsk2	protein_coding	1069.14	940.61	0.879784	-0.184779	0.010714	0.168307
ENSRNOG00000008605	6	26836216	26837440	+	Ost4	protein_coding	334.941	409.397	1.2223	0.289594	0.0107053	0.168307
ENSRNOG00000016460	15	42640146	42665857	+	Clu	protein_coding	7263.75	8189.26	1.12742	0.173019	0.0107328	0.168356
ENSRNOG00000015220	1	261514141	261669586	-	Crtac1	protein_coding	750.546	649.36	0.865183	-0.208922	0.0107532	0.16843
ENSRNOG00000022395	10	106712127	106762043	+	Tnrc6c	protein_coding	984.385	847.646	0.861092	-0.215762	0.0107788	0.168586
ENSRNOG00000017373	15	51464832	51485485	-	Rhobtb2	protein_coding	1205.11	1356.29	1.12545	0.170502	0.0107983	0.168645
ENSRNOG00000018524	1	47287874	47331412	-	Ezr	protein_coding	418.256	497.109	1.18853	0.249178	0.010855	0.169284
ENSRNOG00000017210	17	31236015	31403685	+	Slc22a23	protein_coding	1283.19	1132.99	0.882951	-0.179595	0.0108821	0.169461
ENSRNOG00000003029	19	25956771	25961666	-	Calr	protein_coding	3829.63	4233.9	1.10556	0.14478	0.0109852	0.170604
ENSRNOG00000001178	12	47276476	47360507	-	Sppl3	protein_coding	757.242	652.448	0.861611	-0.214892	0.0109872	0.170604
ENSRNOG00000004730	3	107559997	107760589	-	Meis2	protein_coding	865.569	982.38	1.13495	0.182632	0.0110343	0.171087
ENSRNOG00000006705	3	129866545	129884810	-	Mkks	protein_coding	404.201	482.919	1.19475	0.256707	0.0110896	0.171697
ENSRNOG00000017765	17	70010794	70020982	+	Net1	protein_coding	236.549	186.846	0.789884	-0.340288	0.0111236	0.171975
ENSRNOG00000008025	5	131257127	131312335	+	Bend5	protein_coding	218.909	172.584	0.788381	-0.343035	0.0111414	0.172004
ENSRNOG00000018603	1	219414915	219422268	-	Carns1	protein_coding	92.939	61.4827	0.661538	-0.596104	0.0114569	0.175895
ENSRNOG00000000062	14	2247808	2297155	-	Pcgf3	protein_coding	171.644	218.664	1.27394	0.349296	0.011459	0.175895
ENSRNOG00000007031	6	92660505	92760018	-	Trim9	protein_coding	2481.3	2240.47	0.902943	-0.147293	0.0114572	0.175895
ENSRNOG00000017983	3	3453401	3476215	-	Ubac1	protein_coding	399.087	477.276	1.19592	0.258119	0.0114443	0.175895
ENSRNOG00000030019	2	204003742	204032023	-	Atp1a1	protein_coding	13194.5	12028.8	0.911655	-0.133441	0.0114993	0.176012
ENSRNOG00000003887	14	60764409	60796116	+	Lgi2	protein_coding	848.453	725.408	0.854978	-0.226041	0.0114863	0.176012
ENSRNOG00000020715	1	226657561	226683347	+	Ddb1	protein_coding	2906.62	2626.83	0.903742	-0.146016	0.0115336	0.176285
ENSRNOG00000012424	9	70133969	70290117	+	Adam23	protein_coding	1095.04	958.88	0.875657	-0.191561	0.0116093	0.176689
ENSRNOG00000019388	3	4034921	4043936	+	Egfl7	protein_coding	116.686	156.884	1.3445	0.427066	0.0116056	0.176689
ENSRNOG00000038406	12	35970821	36398246	-	Tmem132b	protein_coding	565.884	482.123	0.851982	-0.231105	0.0115977	0.176689
ENSRNOG00000009873	15	45858608	45947030	-	Ints6	protein_coding	218.215	274.367	1.25732	0.330357	0.0116327	0.176794
ENSRNOG00000012415	1	53026608	53038229	-	Mpc1	protein_coding	701.965	805.278	1.14718	0.198088	0.0116731	0.177158
ENSRNOG00000005512	4	38233680	38240848	-	Ndufa4	protein_coding	1227.27	1383.41	1.12722	0.172772	0.0117	0.177315
ENSRNOG00000006992	5	2632712	2640021	+	Rpl7	protein_coding	1861.07	2091.97	1.12407	0.16873	0.011785	0.178351
ENSRNOG00000043085	8	105323837	105462168	-	Clstn2	protein_coding	1003.99	882.675	0.879163	-0.185797	0.0118221	0.178411
ENSRNOG00000005957	15	11836286	11912916	-	Slc4a7	protein_coding	202.364	156.948	0.775571	-0.36667	0.0118164	0.178411
ENSRNOG00000004831	7	137680530	137795655	+	Arid2	protein_coding	415.478	347.578	0.836575	-0.257432	0.0118593	0.178721
ENSRNOG00000002860	13	82574966	82588640	+	Ccdc181	protein_coding	402.354	477.174	1.18596	0.246053	0.0119163	0.179078
ENSRNOG00000027240	1	212230259	212277694	+	Kndc1	protein_coding	1066.96	938.035	0.879167	-0.185791	0.0119037	0.179078
ENSRNOG00000005185	10	83328410	83332851	-	Nxph3	protein_coding	678.792	582.448	0.858065	-0.220841	0.0119454	0.179255
ENSRNOG00000042213	12	11774788	11785493	-	Zfp498	protein_coding	93.6983	64.9835	0.69354	-0.52795	0.0119615	0.179255
ENSRNOG00000017801	7	121480723	121482772	+	Atf4	protein_coding	1700.85	1888.62	1.1104	0.151075	0.0120045	0.179295
ENSRNOG00000020525	8	21786324	21831668	-	Col5a3	protein_coding	180.061	138.363	0.768422	-0.380029	0.0120142	0.179295
ENSRNOG00000013454	17	49714294	49727664	+	Rala	protein_coding	355.132	290.582	0.818236	-0.289412	0.0120126	0.179295
ENSRNOG00000028884	8	49220443	49227273	-	Atp5l	protein_coding	1559.36	1732.38	1.11095	0.151795	0.0120902	0.180103
ENSRNOG00000014048	19	19265164	19315357	-	Cyld	protein_coding	871.671	1005.63	1.15368	0.206248	0.0121794	0.180103
ENSRNOG00000014048	19	19265164	19315357	-	Cyld	protein_coding	871.671	1005.63	1.15368	0.206248	0.0121794	0.180103
ENSRNOG00000018992	18	37716143	37819097	-	Dpysl3	protein_coding	417.706	345.466	0.827055	-0.273945	0.0121857	0.180103
ENSRNOG00000016592	8	116370744	116391307	-	Gnai2	protein_coding	2255.08	2478.37	1.09902	0.136216	0.0121418	0.180103
ENSRNOG00000020526	16	21132147	21163257	+	Mau2	protein_coding	921.335	809.044	0.87812	-0.187509	0.012141	0.180103
ENSRNOG00000015428	9	90880614	90908852	+	Mff	protein_coding	340.292	408.325	1.19992	0.262942	0.0121822	0.180103
ENSRNOG00000015428	9	90880614	90908852	+	Mff	protein_coding	340.292	408.325	1.19992	0.262942	0.0121822	0.180103
ENSRNOG00000012868	8	65686648	65774989	+	Uaca	protein_coding	71.7302	102.465	1.42848	0.514484	0.0121423	0.180103
ENSRNOG00000016780	5	76860515	76997951	+	RGD1310951	protein_coding	81.451	54.7122	0.671719	-0.574071	0.0122659	0.180975
ENSRNOG00000024562	9	49852560	49902943	-	Tgfbrap1	protein_coding	522.354	445.494	0.852859	-0.22962	0.0122928	0.180975
ENSRNOG00000016684	17	15924048	16032420	+	Wnk2	protein_coding	2388.56	2151.67	0.900825	-0.150681	0.0122952	0.180975
ENSRNOG00000042728	1	198932870	198937750	+	Fbrs	protein_coding	268.052	213.989	0.798313	-0.324974	0.0123485	0.181263
ENSRNOG00000046227	5	171456302	171459488	-	Tprg1l	protein_coding	1160.3	1320.84	1.13837	0.186967	0.0123349	0.181263
ENSRNOG00000003201	X	72074108	72078551	-	Rps4x	protein_coding	1698.97	1936.27	1.13967	0.188621	0.0124538	0.182559
ENSRNOG00000004276	10	82855613	82887497	-	Itga3	protein_coding	443.234	373.308	0.842238	-0.2477	0.0125911	0.184151
ENSRNOG00000016163	2	57860834	57935363	-	Slc1a3	protein_coding	4824.81	5286.46	1.09568	0.13183	0.0126138	0.184151
ENSRNOG00000023861	8	94447550	94564525	-	Snap91	protein_coding	8156.59	7501.48	0.919684	-0.12079	0.0126044	0.184151
ENSRNOG00000055028	1	199225100	199247988	+	AC111812.1	protein_coding	650.179	559.244	0.860139	-0.217359	0.0127545	0.185952
ENSRNOG00000015835	8	116154736	116284985	+	Cacna2d2	protein_coding	644.845	551.87	0.855818	-0.224624	0.0127891	0.185953
ENSRNOG00000028594	11	31640407	31664061	+	Ifnar1	protein_coding	953.152	834.768	0.875798	-0.19133	0.0127761	0.185953
ENSRNOG00000039559	5	57897368	57947183	-	Fam219a	protein_coding	1875.08	1696.12	0.904559	-0.144713	0.0128575	0.186695
ENSRNOG00000011140	16	17493953	17513870	+	Fam213a	protein_coding	415.46	489.972	1.17935	0.23799	0.0129048	0.187128
ENSRNOG00000014702	17	21382455	21422407	+	Elovl2	protein_coding	337.976	406.248	1.202	0.26544	0.0130009	0.188267
ENSRNOG00000030714	8	116873721	116965396	-	Bsn	protein_coding	8375.19	7428.26	0.886936	-0.173099	0.0130729	0.18867
ENSRNOG00000033059	7	142322172	142352382	-	Galnt6	protein_coding	79.7494	52.2508	0.655188	-0.61002	0.0130795	0.18867
ENSRNOG00000051948	X	156812064	156837227	+	Hcfc1	protein_coding	1352.69	1203.45	0.889673	-0.168653	0.0130904	0.18867
ENSRNOG00000023393	3	10999186	11070638	+	Nup214	protein_coding	639.473	551.42	0.862303	-0.213732	0.0130989	0.18867
ENSRNOG00000024703	15	44453308	44627765	-	Dock5	protein_coding	84.9994	57.9975	0.682329	-0.551461	0.013158	0.189129
ENSRNOG00000015278	9	119325283	119332967	-	Myl12a	protein_coding	112.289	153.184	1.3642	0.448054	0.013166	0.189129
ENSRNOG00000000585	20	45384000	45399694	-	Amd1	protein_coding	1413.53	1574.53	1.1139	0.155618	0.0131927	0.18926
ENSRNOG00000055278	4	16946938	16953847	-	AABR07059380.1	lincRNA	188.24	144.587	0.768099	-0.380636	0.0132664	0.189414
ENSRNOG00000012852	18	25163561	25222135	+	Bin1	protein_coding	3466.91	3123.84	0.901044	-0.15033	0.0132541	0.189414
ENSRNOG00000000158	18	40701984	40716686	-	Cdo1	protein_coding	462.695	539.648	1.16632	0.221958	0.0132236	0.189414
ENSRNOG00000015257	8	67376294	67492037	-	Coro2b	protein_coding	1027.78	899.519	0.875206	-0.192305	0.0133092	0.189414
ENSRNOG00000016467	18	6374778	6474990	-	Kctd1	protein_coding	670.782	776.812	1.15807	0.211721	0.0132801	0.189414
ENSRNOG00000001108	12	628488	650376	-	N4bp2l2	protein_coding	162.395	206.598	1.2722	0.347321	0.0133013	0.189414
ENSRNOG00000018529	7	11944958	11963268	-	Csnk1g2	protein_coding	1059.37	1204.23	1.13675	0.184914	0.0133374	0.189565
ENSRNOG00000018878	1	219511910	219519398	-	Ssh3	protein_coding	330.034	268.748	0.814302	-0.296363	0.0133664	0.189725
ENSRNOG00000015977	8	71230830	71337746	-	Zfp609	protein_coding	654.643	562.046	0.858555	-0.220018	0.0134304	0.190383
ENSRNOG00000002369	13	71086745	71141075	+	Rgs8	protein_coding	800.756	928.748	1.15984	0.213925	0.0135559	0.191907
ENSRNOG00000018317	4	118655728	118795774	+	Aak1	protein_coding	6984.73	6404.4	0.916915	-0.12514	0.013593	0.19218
ENSRNOG00000000520	20	6288267	6298213	+	Srsf3	protein_coding	894.146	1020.97	1.14183	0.191353	0.0136997	0.193434
ENSRNOG00000001143	12	46334665	46494174	-	Cit	protein_coding	1830.3	1629.4	0.890236	-0.167741	0.013743	0.193761
ENSRNOG00000002347	13	69909096	70174565	-	Rgl1	protein_coding	920.133	1039.15	1.12935	0.17549	0.013795	0.193761
ENSRNOG00000008461	7	123578878	123580839	+	Smdt1	protein_coding	423.966	502.316	1.1848	0.244649	0.0137776	0.193761
ENSRNOG00000012266	5	148535519	148577292	-	Zcchc17	protein_coding	481.171	562.737	1.16952	0.225912	0.0137622	0.193761
ENSRNOG00000028611	X	15948853	15950397	-	AABR07037203.1	processed_pseudogene	222.207	175.945	0.791806	-0.336782	0.0138741	0.194004
ENSRNOG00000000157	18	40721800	40732126	-	Atg12	protein_coding	750.966	863.562	1.14993	0.201551	0.0138532	0.194004
ENSRNOG00000032490	13	31081804	31231213	+	Cdh7	protein_coding	138.391	181.743	1.31326	0.393147	0.0138775	0.194004
ENSRNOG00000021007	1	221487051	221496306	-	Snx15	protein_coding	283.876	225.272	0.793556	-0.333596	0.0138845	0.194004
ENSRNOG00000023446	14	3284089	3300200	-	Btbd8	protein_coding	599.932	693.788	1.15645	0.209698	0.0139368	0.194482
ENSRNOG00000009821	2	170452702	170460754	-	Slitrk3	protein_coding	533.329	453.543	0.8504	-0.233786	0.0139893	0.194961
ENSRNOG00000008673	12	39653953	39667849	-	Arpc3	protein_coding	1082.93	1217.78	1.12452	0.169314	0.0140551	0.195473
ENSRNOG00000002303	10	47281786	47341411	+	Kcnj12	protein_coding	206.11	161.115	0.781691	-0.35533	0.0140624	0.195473
ENSRNOG00000046493	10	84874927	84881190	-	Pnpo	protein_coding	814.475	699.162	0.858421	-0.220243	0.0141009	0.195514
ENSRNOG00000019704	9	82470759	82477181	-	Resp18	protein_coding	739.507	868.814	1.17486	0.232484	0.0141018	0.195514
ENSRNOG00000005281	3	172154754	172183732	+	Stx16	protein_coding	1129.15	997.039	0.882997	-0.179519	0.0141359	0.195582
ENSRNOG00000012782	1	239398043	239474931	+	Tmem2	protein_coding	530.883	453.616	0.854455	-0.226923	0.0141431	0.195582
ENSRNOG00000011435	8	123126667	123293562	+	Osbpl10	protein_coding	422.842	356.046	0.84203	-0.248056	0.0142113	0.195769
ENSRNOG00000021125	1	222164462	222167447	-	Prdx5	protein_coding	1062.25	1197.52	1.12734	0.172917	0.0141776	0.195769
ENSRNOG00000005309	7	142575672	142684114	+	Scn8a	protein_coding	3340.12	2964.31	0.887486	-0.172204	0.0141968	0.195769
ENSRNOG00000031197	18	367862	399242	-	F8	protein_coding	283.863	225.761	0.795316	-0.330401	0.0144291	0.198081
ENSRNOG00000010409	5	57445344	57455018	-	Nol6	protein_coding	1451.99	1293.36	0.890747	-0.166912	0.0144134	0.198081
ENSRNOG00000051620	4	160530720	160662974	-	Tspan9	protein_coding	295.429	241.389	0.817081	-0.29145	0.0144344	0.198081
ENSRNOG00000007126	4	168639940	168656673	-	Gpr19	protein_coding	79.4255	111.654	1.40577	0.491365	0.0145232	0.198539
ENSRNOG00000021750	3	148215540	148216718	+	Id1	protein_coding	55.9782	83.0467	1.48355	0.569057	0.0145213	0.198539
ENSRNOG00000006028	7	130080895	130101858	-	Tubgcp6	protein_coding	462.408	391.601	0.846874	-0.23978	0.0145146	0.198539
ENSRNOG00000013072	4	59445767	59809321	-	Plxna4	protein_coding	860.327	756.12	0.878875	-0.18627	0.0145468	0.198608
ENSRNOG00000020247	1	220474493	220480132	-	Cnih2	protein_coding	1658.49	1898.21	1.14454	0.194768	0.0145787	0.198768
ENSRNOG00000042503	9	113875703	113900190	-	Ndufv2	protein_coding	1251.89	1392.08	1.11198	0.153133	0.0145954	0.198768
ENSRNOG00000052899	5	142508486	142511865	-	AABR07049886.2	lincRNA	143.905	107.527	0.74721	-0.420415	0.0146308	0.198997
ENSRNOG00000028879	7	142397371	142464158	+	Slc4a8	protein_coding	627.443	526.999	0.839914	-0.251686	0.0147487	0.200347
ENSRNOG00000024953	5	24860153	24908397	+	RGD1559441	protein_coding	435.971	362.209	0.830809	-0.267411	0.0148036	0.200839
ENSRNOG00000016220	3	12009578	12011666	+	Rpl12	protein_coding	1052.16	1198.18	1.13878	0.187494	0.0148509	0.201227
ENSRNOG00000003251	13	60435946	60444957	+	B3galt2	protein_coding	609.303	514.875	0.845023	-0.242937	0.0149251	0.201741
ENSRNOG00000013572	2	164628566	164634434	-	Lxn	protein_coding	131.884	172.768	1.31	0.389572	0.0149452	0.201741
ENSRNOG00000014999	2	29056219	29121104	-	Tnpo1	protein_coding	717.57	836.917	1.16632	0.221964	0.0149318	0.201741
ENSRNOG00000012705	10	85632819	85636902	-	Pcgf2	protein_coding	155.314	117.02	0.753446	-0.408425	0.0149785	0.201938
ENSRNOG00000008431	5	62276100	62621737	-	Gabbr2	protein_coding	5527.4	5071.08	0.917443	-0.12431	0.0150985	0.203046
ENSRNOG00000027012	15	4091754	4190408	+	Usp54	protein_coding	916.399	795.829	0.868431	-0.203517	0.0150913	0.203046
ENSRNOG00000018475	14	83412968	83455456	+	Eif4enif1	protein_coding	478.804	403.598	0.842928	-0.246518	0.0152519	0.204715
ENSRNOG00000020032	4	56478384	56493923	-	Impdh1	protein_coding	585.34	505.611	0.86379	-0.211248	0.0152608	0.204715
ENSRNOG00000017503	18	56626712	56728968	-	Ppargc1b	protein_coding	157.051	119.099	0.758342	-0.39908	0.0152928	0.20489
ENSRNOG00000053450	1	64438472	64446818	-	Myadm	protein_coding	826.478	720.868	0.872218	-0.19724	0.015328	0.205105
ENSRNOG00000039091	6	64252111	64284768	+	Pnpla8	protein_coding	1372.63	1533.96	1.11753	0.160319	0.0153826	0.20558
ENSRNOG00000060061	10	38836614	38838272	-	Sowaha	protein_coding	238.343	291.647	1.22364	0.291183	0.0154443	0.206148
ENSRNOG00000021153	1	222232351	222235102	-	Fkbp2	protein_coding	755.743	861.831	1.14038	0.18951	0.015493	0.206541
ENSRNOG00000015813	9	16003058	16080152	+	Ubr2	protein_coding	963.869	842.145	0.873713	-0.194769	0.015622	0.208003
ENSRNOG00000042848	11	24266345	24285275	+	Jam2	protein_coding	367.952	437.566	1.18919	0.24998	0.0156454	0.208057
ENSRNOG00000017879	19	30794571	30902008	+	Gab1	protein_coding	151.329	113.951	0.753004	-0.40927	0.0156716	0.208147
ENSRNOG00000026646	5	141390580	141405453	-	Ndufs5	protein_coding	397.663	469.497	1.18064	0.23957	0.0157006	0.208275
ENSRNOG00000026646	5	141390580	141405453	-	Ndufs5	protein_coding	397.663	469.497	1.18064	0.23957	0.0157006	0.208275
ENSRNOG00000054955	1	212181374	212211578	+	Adgra1	protein_coding	494.627	415.585	0.840199	-0.251197	0.0157611	0.208712
ENSRNOG00000007033	14	79538911	79912333	+	Sorcs2	protein_coding	1234.12	1074.6	0.870742	-0.199682	0.0157724	0.208712
ENSRNOG00000019977	5	137036935	137112927	-	Ptprf	protein_coding	2046.02	1844.94	0.901718	-0.149251	0.0159575	0.210901
ENSRNOG00000016227	1	209768696	209799903	+	Glrx3	protein_coding	879.303	993.999	1.13044	0.176884	0.0161746	0.212377
ENSRNOG00000012062	6	108467410	108488330	-	Npc2	protein_coding	511.398	598.941	1.17118	0.227967	0.0161326	0.212377
ENSRNOG00000011931	1	244615821	244782706	+	Smarca2	protein_coding	2303.51	2550.09	1.10705	0.146715	0.0161673	0.212377
ENSRNOG00000010258	4	145580799	145587845	+	Vhl	protein_coding	283.855	341.963	1.20471	0.268687	0.0161272	0.212377
ENSRNOG00000024435	12	28381982	29268073	+	Wbscr17	protein_coding	686.093	589.495	0.859206	-0.218923	0.0161468	0.212377
ENSRNOG00000036662	10	110525749	110555761	-	Wdr45b	protein_coding	267.086	324.02	1.21317	0.278779	0.0161877	0.212377
ENSRNOG00000011905	4	153351421	153373649	-	Atp6v1e1	protein_coding	4351.8	4722.75	1.08524	0.118013	0.0162313	0.212554
ENSRNOG00000010552	2	243160917	243173048	+	Lamtor3	protein_coding	280.315	337.998	1.20578	0.269967	0.0162605	0.212554
ENSRNOG00000004741	10	85978691	85981979	+	Rpl19	protein_coding	1532.86	1728.82	1.12784	0.173561	0.0162447	0.212554
ENSRNOG00000016225	17	15749978	15800401	+	Fgd3	protein_coding	128.386	94.4639	0.735783	-0.442649	0.0163776	0.213565
ENSRNOG00000006110	5	1417478	1511416	+	Jph1	protein_coding	150.388	191.529	1.27357	0.348876	0.0163739	0.213565
ENSRNOG00000018111	3	161425988	161462879	+	Slc12a5	protein_coding	4586.59	4166.61	0.908432	-0.138549	0.0164335	0.214033
ENSRNOG00000019553	15	34304425	34314345	-	Ipo4	protein_coding	892.294	779.346	0.873419	-0.195255	0.0164633	0.214163
ENSRNOG00000025936	12	40877613	40881124	-	Rpl6	protein_coding	2010.48	2233.58	1.11097	0.151821	0.0165701	0.215264
ENSRNOG00000019536	18	55744810	55771730	-	Smim3	protein_coding	100.383	133.734	1.33224	0.413854	0.016588	0.215264
ENSRNOG00000010107	16	31734944	31946242	+	Palld	protein_coding	153.478	117.598	0.766221	-0.384167	0.0166819	0.21622
ENSRNOG00000054775	7	140398199	140437467	-	Fkbp11	protein_coding	17006.6	18266.6	1.07409	0.103114	0.0168513	0.218153
ENSRNOG00000054775	7	140398199	140437467	-	Fkbp11	protein_coding	17006.6	18266.6	1.07409	0.103114	0.0168513	0.218153
ENSRNOG00000002669	10	61432819	61454444	+	Cluh	protein_coding	1768.68	1596.26	0.902518	-0.147972	0.0169498	0.219165
ENSRNOG00000038597	11	72163749	72378895	-	Dlg1	protein_coding	1498.77	1692.63	1.12935	0.175489	0.0170545	0.220253
ENSRNOG00000002653	13	107690087	107886476	-	Kcnk2	protein_coding	390.999	322.928	0.825905	-0.275952	0.017175	0.22154
ENSRNOG00000010389	15	28305821	28314459	-	Ndrg2	protein_coding	5349.77	5929.32	1.10833	0.148392	0.0171954	0.22154
ENSRNOG00000043328	1	65541322	65543707	+	Chmp2a	protein_coding	598.409	685.113	1.14489	0.195211	0.017257	0.222068
ENSRNOG00000006049	19	25181564	25212410	+	Rfx1	protein_coding	287.439	235.658	0.819856	-0.286558	0.0175117	0.225075
ENSRNOG00000058662	16	19886051	19894591	-	Ano8	protein_coding	572.017	493.646	0.862992	-0.21258	0.0175572	0.225233
ENSRNOG00000025679	5	144114012	144150647	+	Stk40	protein_coding	412.44	483.113	1.17135	0.228176	0.0175659	0.225233
ENSRNOG00000026114	1	220948331	220952391	+	Ap5b1	protein_coding	180.598	138.091	0.764631	-0.387165	0.0176691	0.225268
ENSRNOG00000004091	10	85684898	85709568	-	Cwc25	protein_coding	130.003	167.697	1.28995	0.367313	0.0176461	0.225268
ENSRNOG00000025715	3	150761329	150782493	+	Dynlrb1	protein_coding	1723.09	1933.83	1.12231	0.166465	0.0176734	0.225268
ENSRNOG00000005058	3	103726238	103733354	+	Lpcat4	protein_coding	1124.48	1002.31	0.891353	-0.165931	0.0176289	0.225268
ENSRNOG00000004109	7	79638046	79964405	+	Zfpm2	protein_coding	249.731	201.869	0.808344	-0.306958	0.0175902	0.225268
ENSRNOG00000005668	3	15362824	15379381	-	Ndufa8	protein_coding	1257.08	1420.06	1.12965	0.175877	0.0177525	0.225936
ENSRNOG00000013436	1	15893533	16203909	-	Pde7b	protein_coding	82.1146	112.652	1.37189	0.456169	0.0177679	0.225936
ENSRNOG00000027906	19	55703824	55737500	-	Ankrd11	protein_coding	2310.01	2078.78	0.899901	-0.152161	0.0178441	0.226637
ENSRNOG00000008474	14	80314431	80355420	-	Acox3	protein_coding	272.653	223.581	0.82002	-0.286269	0.01794	0.227188
ENSRNOG00000017002	1	277537585	277538985	+	Adrb1	protein_coding	143.966	184.573	1.28206	0.35846	0.0179509	0.227188
ENSRNOG00000013484	9	27368272	27452902	-	LOC102550391	protein_coding	336.211	409.99	1.21944	0.28622	0.0179355	0.227188
ENSRNOG00000010776	16	21364101	21380331	-	Atp13a1	protein_coding	549.922	472.738	0.859647	-0.218184	0.0180093	0.227251
ENSRNOG00000011268	5	169519212	169567107	+	Chd5	protein_coding	4423.65	4012.6	0.907077	-0.140703	0.0180275	0.227251
ENSRNOG00000058909	1	64018125	64090021	-	Rps9	protein_coding	745.534	854.854	1.14663	0.197404	0.0180405	0.227251
ENSRNOG00000058909	1	64018125	64090021	-	Rps9	protein_coding	745.534	854.854	1.14663	0.197404	0.0180405	0.227251
ENSRNOG00000013866	9	15317413	15375365	-	Usp49	protein_coding	124.2	91.8882	0.739838	-0.434718	0.0180142	0.227251
ENSRNOG00000055257	2	250600823	250633897	+	Sept15	protein_coding	1605.52	1778.58	1.10779	0.14769	0.0181227	0.227687
ENSRNOG00000049077	10	13161510	13161588	+	AABR07029204.1	miRNA	79.4058	54.681	0.688627	-0.538205	0.0181387	0.227687
ENSRNOG00000014078	1	264298669	264303762	-	Ndufb8	protein_coding	1274.36	1443.78	1.13295	0.180082	0.0181054	0.227687
ENSRNOG00000010567	6	110644267	110681408	-	Angel1	protein_coding	164.212	124.052	0.755435	-0.404621	0.0182778	0.228631
ENSRNOG00000049959	5	158503244	158549496	-	Igsf21	protein_coding	516.296	435.197	0.842922	-0.246529	0.0182465	0.228631
ENSRNOG00000008140	15	8189253	8192152	+	Rpl15	protein_coding	1392.75	1561.52	1.12118	0.165018	0.0182588	0.228631
ENSRNOG00000008140	15	8189253	8192152	+	Rpl15	protein_coding	1392.75	1561.52	1.12118	0.165018	0.0182588	0.228631
ENSRNOG00000007029	5	57028467	57039378	+	Dnaja1	protein_coding	2297.25	2526.63	1.09985	0.137306	0.0183381	0.228853
ENSRNOG00000017510	1	140845465	140860894	-	Mfge8	protein_coding	1457.5	1620.66	1.11194	0.153083	0.018324	0.228853
ENSRNOG00000012410	2	189900667	189903219	-	S100a1	protein_coding	113.951	150.039	1.3167	0.396927	0.0184105	0.229225
ENSRNOG00000003099	X	18723341	18726732	-	Ubqln2	protein_coding	1668.62	1483.51	0.889063	-0.169642	0.0183999	0.229225
ENSRNOG00000017496	10	88490798	88497356	+	Cnp	protein_coding	2735.56	1809.45	0.661454	-0.596287	0.0184903	0.22934
ENSRNOG00000060449	3	175629374	175630048	+	Rps21	protein_coding	899.476	1036.34	1.15216	0.204339	0.0185052	0.22934
ENSRNOG00000014297	3	160872503	160891190	-	Sdc4	protein_coding	240.998	292.165	1.21232	0.277766	0.0184651	0.22934
ENSRNOG00000050500	7	123079537	123088279	-	Tob2	protein_coding	124.446	161.672	1.29913	0.377546	0.0185002	0.22934
ENSRNOG00000033791	7	12258468	12275609	-	Apc2	protein_coding	2643.69	2378.64	0.899742	-0.152416	0.0185693	0.22953
ENSRNOG00000017154	16	81990340	82100222	-	Atp11a	protein_coding	679.78	587.56	0.864338	-0.210332	0.0186238	0.22953
ENSRNOG00000017817	19	54245950	54252225	+	Cox4i1	protein_coding	4432.8	4867.29	1.09802	0.1349	0.0186263	0.22953
ENSRNOG00000005662	4	142780987	143367578	+	Grm7	protein_coding	478.711	402.48	0.840758	-0.250237	0.0186071	0.22953
ENSRNOG00000004353	7	48867664	49042455	+	Ppfia2	protein_coding	1010.13	1142.17	1.13071	0.177227	0.0186399	0.22953
ENSRNOG00000013938	1	92703080	92774975	-	Tshz3	protein_coding	490.037	415.567	0.848032	-0.237809	0.0186487	0.22953
ENSRNOG00000016117	1	256585410	256734730	-	Myof	protein_coding	137.522	103.166	0.750173	-0.414704	0.018865	0.231134
ENSRNOG00000005390	4	122644135	122741110	-	Nup210	protein_coding	374.878	314.36	0.838566	-0.254004	0.0188578	0.231134
ENSRNOG00000042467	5	126264105	126282385	-	Ttc4	protein_coding	383.319	450.284	1.1747	0.232289	0.0188494	0.231134
ENSRNOG00000047505	9	9961021	9968486	+	Tubb4a	protein_coding	9677.64	7922.79	0.81867	-0.288645	0.0188147	0.231134
ENSRNOG00000016660	9	43259709	43262040	+	Cox5b	protein_coding	1784.98	1992.19	1.11608	0.158445	0.0189089	0.2314
ENSRNOG00000042068	2	198231291	198300201	+	Otud7b	protein_coding	391.159	326.784	0.835425	-0.259418	0.0189298	0.2314
ENSRNOG00000020889	1	101480145	101500850	-	Nucb1	protein_coding	3062.33	2789.89	0.911036	-0.134421	0.0189595	0.2315
ENSRNOG00000005828	10	37594578	37609498	+	Skp1	protein_coding	3647.54	3942.14	1.08077	0.112054	0.0189872	0.231575
ENSRNOG00000009001	7	98820812	98960837	-	Mtss1	protein_coding	421.762	355.155	0.842074	-0.247981	0.0190369	0.231918
ENSRNOG00000018991	3	14467330	14508911	+	Gsn	protein_coding	766.033	515.965	0.673555	-0.570131	0.019089	0.232289
ENSRNOG00000018975	9	82382800	82393382	-	Atg9a	protein_coding	1933.21	1753.43	0.907004	-0.140819	0.0192862	0.234223
ENSRNOG00000033916	5	159606647	159606989	+	LOC100363012	protein_coding	206.12	255.302	1.23861	0.308721	0.0192915	0.234223
ENSRNOG00000002989	10	91126689	91160720	+	Nmt1	protein_coding	1283.45	1425.92	1.11101	0.151871	0.019341	0.234559
ENSRNOG00000032136	6	1922500	1942972	-	Cdc42ep3	protein_coding	99.7486	133.097	1.33432	0.416105	0.0193986	0.234573
ENSRNOG00000005087	6	1516804	1534488	-	Cebpz	protein_coding	318.252	379.811	1.19343	0.255109	0.0193875	0.234573
ENSRNOG00000018343	17	5281727	5294384	+	Isca1	protein_coding	1996.83	2204.21	1.10386	0.142551	0.0194076	0.234573
ENSRNOG00000017283	3	3310954	3365340	+	Kcnt1	protein_coding	795.325	690.769	0.868537	-0.203341	0.0194356	0.234646
ENSRNOG00000049951	1	220373290	220467159	-	LOC103689952	protein_coding	874.245	756.057	0.864811	-0.209544	0.0194719	0.234821
ENSRNOG00000049951	1	220373290	220467159	-	LOC103689952	protein_coding	874.245	756.057	0.864811	-0.209544	0.0194719	0.234821
ENSRNOG00000016015	16	6542216	6587619	+	Dcp1a	protein_coding	339.398	283.056	0.833995	-0.261889	0.0195292	0.234985
ENSRNOG00000010065	15	60803098	60959769	-	Dgkh	protein_coding	288.509	235.87	0.817547	-0.290627	0.0195239	0.234985
ENSRNOG00000027405	1	188420461	188444991	+	Ccp110	protein_coding	570.255	488.297	0.856278	-0.223849	0.0195523	0.234999
ENSRNOG00000012702	9	14551758	14576967	+	Nfya	protein_coding	108.192	142.023	1.3127	0.392532	0.0196101	0.23543
ENSRNOG00000024671	18	44468784	44642050	+	Dmxl1	protein_coding	869.662	1009.61	1.16092	0.215266	0.0196811	0.235494
ENSRNOG00000051671	8	72029489	72198358	+	Herc1	protein_coding	4732.14	4319.42	0.912783	-0.131657	0.0196635	0.235494
ENSRNOG00000006865	6	34028936	34059961	+	Laptm4a	protein_coding	1644.23	1823.96	1.10931	0.149658	0.0196795	0.235494
ENSRNOG00000011384	2	237727764	237751378	-	Aimp1	protein_coding	301.542	364.461	1.20866	0.273408	0.0197747	0.236
ENSRNOG00000010188	9	63456783	63641400	-	Satb2	protein_coding	1552.02	1383.69	0.891542	-0.165625	0.0197893	0.236
ENSRNOG00000002051	11	31104787	31180642	-	Synj1	protein_coding	6483.68	5984.32	0.922982	-0.115625	0.0197698	0.236
ENSRNOG00000025155	12	12409876	12546111	-	Lmtk2	protein_coding	3745.88	3434.64	0.916912	-0.125145	0.0198424	0.236232
ENSRNOG00000009615	5	165263800	165373967	+	Mtor	protein_coding	1956.02	1783.42	0.911757	-0.133279	0.0198527	0.236232
ENSRNOG00000013502	16	19127724	19203003	+	Eps15l1	protein_coding	624.167	540.584	0.866089	-0.207414	0.0200125	0.237269
ENSRNOG00000017930	1	32379432	32429917	-	Lpcat1	protein_coding	399.966	337.532	0.843901	-0.244854	0.0199784	0.237269
ENSRNOG00000003495	10	63635219	63658361	+	Prpf8	protein_coding	4005.91	3671.86	0.916611	-0.125618	0.0200074	0.237269
ENSRNOG00000052725	7	125340475	125407806	-	RGD1566029	protein_coding	885.272	775.127	0.87558	-0.191689	0.0200503	0.237269
ENSRNOG00000019980	19	59863421	59873411	-	Tomm20	protein_coding	1269.48	1420.13	1.11867	0.161784	0.0200434	0.237269
ENSRNOG00000015904	19	52313795	52332697	+	Wfdc1	protein_coding	55.6719	79.9081	1.43534	0.521392	0.020075	0.2373
ENSRNOG00000025383	X	37329779	37343410	+	Pdha1	protein_coding	1681.49	1854.73	1.10303	0.141471	0.0201027	0.237335
ENSRNOG00000009345	2	229644382	229718659	-	Ugt8	protein_coding	413.319	252.961	0.612025	-0.708337	0.0201221	0.237335
ENSRNOG00000005874	7	10988532	11003785	-	Tle2	protein_coding	174.732	136.695	0.782315	-0.354179	0.0201461	0.237358
ENSRNOG00000001823	11	80927601	80981422	-	St6gal1	protein_coding	195.612	154.467	0.78966	-0.340697	0.0201871	0.23758
ENSRNOG00000021140	1	222183276	222189604	-	Kcnk4	protein_coding	413.842	349.853	0.845378	-0.242331	0.0202212	0.237721
ENSRNOG00000019246	15	34265557	34269851	-	Psme2	protein_coding	149.124	188.673	1.26521	0.339376	0.0202754	0.238097
ENSRNOG00000001136	12	45026886	45031145	+	Pebp1	protein_coding	3932.39	4308.09	1.09554	0.13164	0.02032	0.238361
ENSRNOG00000023521	1	84473071	84491466	-	Map3k10	protein_coding	2039.75	2244.33	1.1003	0.137894	0.0203709	0.238697
ENSRNOG00000021569	11	29933163	30051103	-	Tiam1	protein_coding	645.183	556.393	0.86238	-0.213604	0.0204124	0.238923
ENSRNOG00000018845	3	3809407	3824284	-	Snapc4	protein_coding	275.681	226.835	0.822818	-0.281354	0.0204503	0.239106
ENSRNOG00000013186	10	40812858	40846252	+	G3bp1	protein_coding	1117.08	1245.69	1.11513	0.157208	0.0205293	0.239769
ENSRNOG00000020433	1	87078020	87147333	-	Actn4	protein_coding	2306.58	2105.86	0.912979	-0.131346	0.0205766	0.239897
ENSRNOG00000027049	12	11191812	11198369	+	Atp5j2	protein_coding	1151.16	1302.2	1.1312	0.177856	0.0205849	0.239897
ENSRNOG00000027049	12	11191812	11198369	+	Atp5j2	protein_coding	1151.16	1302.2	1.1312	0.177856	0.0205849	0.239897
ENSRNOG00000047761	14	4998539	5033942	-	Zfp326	protein_coding	218.81	175.319	0.801237	-0.319699	0.0206367	0.24024
ENSRNOG00000000565	20	30699872	30749940	-	Sgpl1	protein_coding	603.192	518.112	0.85895	-0.219354	0.0206749	0.240424
ENSRNOG00000011452	10	65586504	65590126	+	Aldoc	protein_coding	6440.75	7059.13	1.09601	0.132262	0.0207527	0.240548
ENSRNOG00000010189	16	757403	762075	+	Rps24	protein_coding	1179.45	1328.09	1.12603	0.171245	0.0207497	0.240548
ENSRNOG00000021234	3	123224242	123236535	-	Slc4a11	protein_coding	111.313	145.273	1.30509	0.384148	0.0207218	0.240548
ENSRNOG00000028426	16	81839653	81980027	-	Mcf2l	protein_coding	2286.43	2062.85	0.902215	-0.148457	0.0208587	0.241516
ENSRNOG00000014259	5	140692779	140698609	+	Mycl	protein_coding	128.52	96.9799	0.754592	-0.406231	0.0209153	0.24165
ENSRNOG00000048431	15	34520142	34539930	+	Nynrin	protein_coding	182.107	143.006	0.785286	-0.34871	0.0208988	0.24165
ENSRNOG00000024492	2	232147690	232178671	-	Ap1ar	protein_coding	473.443	548.899	1.15938	0.213349	0.0209622	0.241672
ENSRNOG00000014863	5	59348639	59415135	+	Reck	protein_coding	315.508	258.704	0.819962	-0.286372	0.0209572	0.241672
ENSRNOG00000052583	3	112283112	112320762	-	Zfp106	protein_coding	2317.28	2550.26	1.10054	0.138214	0.0211042	0.243049
ENSRNOG00000053168	2	230476320	230479594	+	AABR07013250.1	lincRNA	78.2107	54.3134	0.69445	-0.526058	0.0212888	0.244603
ENSRNOG00000019529	1	143609731	143647124	-	Btbd1	protein_coding	1751.6	1923.62	1.09821	0.13515	0.0213041	0.244603
ENSRNOG00000012021	3	154212202	154373169	+	Ctnnbl1	protein_coding	229.521	279.652	1.21842	0.285007	0.0213302	0.244603
ENSRNOG00000002122	14	5283647	5378726	-	Lrrc8c	protein_coding	345.125	411.191	1.19143	0.252689	0.0213264	0.244603
ENSRNOG00000006209	7	70571435	70577147	-	Mbd6	protein_coding	252.637	204.762	0.810502	-0.303113	0.0214064	0.245215
ENSRNOG00000013962	4	10995234	11610518	-	Magi2	protein_coding	1007.51	890.781	0.884143	-0.177648	0.0214369	0.245303
ENSRNOG00000011680	1	145781928	145870912	-	Il16	protein_coding	84.403	117.043	1.38671	0.47167	0.021575	0.245933
ENSRNOG00000053875	14	86860608	86868598	-	Nacad	protein_coding	623.871	534.439	0.85665	-0.223222	0.0216025	0.245933
ENSRNOG00000002907	13	50555454	50578720	-	Plekha6	processed_transcript	1194.11	1066	0.892719	-0.163722	0.0215883	0.245933
ENSRNOG00000015971	18	52917124	52985261	+	Slc12a2	protein_coding	649.927	564.001	0.867791	-0.20458	0.0216064	0.245933
ENSRNOG00000027491	1	245237736	245269205	+	Vldlr	protein_coding	587.605	508.233	0.864924	-0.209355	0.0215389	0.245933
ENSRNOG00000002875	13	78912361	78957212	-	Klhl20	protein_coding	355.643	299.095	0.840998	-0.249825	0.0216306	0.245948
ENSRNOG00000060045	11	87858453	87973422	+	Pi4ka	protein_coding	5056.91	4676.5	0.924775	-0.112825	0.0216792	0.24624
ENSRNOG00000047329	12	9846398	9857548	+	Mtif3	protein_coding	52.3281	75.5693	1.44414	0.530214	0.0217162	0.2464
ENSRNOG00000007172	6	3276738	3444519	-	Map4k3	protein_coding	1139.28	1019.02	0.894437	-0.160948	0.0217495	0.246518
ENSRNOG00000013832	14	81516407	81638934	-	Fam193a	protein_coding	507.166	437.072	0.861792	-0.214588	0.0219859	0.248672
ENSRNOG00000000938	12	31320624	31323810	-	Ran	protein_coding	1959.33	2172.63	1.10886	0.149078	0.0219747	0.248672
ENSRNOG00000000322	20	49318308	49393140	+	Atg5	protein_coding	147.229	187.297	1.27215	0.347263	0.0220402	0.248916
ENSRNOG00000011073	14	81105139	81254637	-	Htt	protein_coding	2518.1	2273.53	0.902874	-0.147404	0.0220538	0.248916
ENSRNOG00000021213	2	198726118	198751985	+	Lix1l	protein_coding	252.994	305.688	1.20828	0.272957	0.0221021	0.249199
ENSRNOG00000013781	9	27562959	27761733	-	Kcnq5	protein_coding	2008.94	1775.7	0.883898	-0.178048	0.0221518	0.249236
ENSRNOG00000028274	1	226260558	226292480	-	Myrf	protein_coding	566.413	394.448	0.696396	-0.522019	0.0221337	0.249236
ENSRNOG00000010184	4	145559206	145574438	+	Brk1	protein_coding	1551.92	1714.26	1.10461	0.143535	0.0222938	0.249268
ENSRNOG00000018550	10	59613398	59643111	+	Ncbp3	protein_coding	142.653	181.181	1.27008	0.344915	0.0221879	0.249268
ENSRNOG00000036827	7	145146481	145154131	-	Ppp1r1a	protein_coding	562.706	654.946	1.16392	0.218996	0.0222414	0.249268
ENSRNOG00000011582	8	22918699	22929294	-	Rab3d	protein_coding	247.292	201.49	0.814786	-0.295508	0.0222862	0.249268
ENSRNOG00000014816	1	246954980	247037056	+	Slc1a1	protein_coding	1356.61	1220.5	0.899663	-0.152543	0.0222586	0.249268
ENSRNOG00000053468	7	140614752	140617721	-	Tuba1b	protein_coding	5742.36	6167.73	1.07408	0.103097	0.0222852	0.249268
ENSRNOG00000027220	18	30909490	30912592	+	Pcdhgb8	protein_coding	159.749	122.836	0.768933	-0.37907	0.0223661	0.249817
ENSRNOG00000020763	1	101367471	101388129	-	Snrnp70	protein_coding	2247.54	2001.25	0.890417	-0.167447	0.0224312	0.250283
ENSRNOG00000009664	1	157419123	157461588	-	Ankrd42	protein_coding	153.712	194.462	1.26511	0.339259	0.022509	0.250632
ENSRNOG00000005184	3	103747654	103748739	+	Nop10	protein_coding	569.433	650.705	1.14273	0.192479	0.0224947	0.250632
ENSRNOG00000022704	8	107555277	107602263	-	Esyt3	protein_coding	101.729	73.2071	0.719631	-0.47467	0.0227977	0.251358
ENSRNOG00000049560	13	71331052	71340229	+	Glul	protein_coding	6440.67	7028.67	1.09129	0.12604	0.0227671	0.251358
ENSRNOG00000037613	10	56001799	56008885	-	Kdm6b	protein_coding	207.356	254.558	1.22764	0.295885	0.0227372	0.251358
ENSRNOG00000030442	17	24610493	24611103	-	LOC100362583	pseudogene	181.928	225.934	1.24189	0.312534	0.0228191	0.251358
ENSRNOG00000061928	8	76754492	76839593	+	Myo1e	protein_coding	117.02	87.6737	0.749223	-0.416533	0.0226979	0.251358
ENSRNOG00000027864	14	86673775	86677443	+	Ppia	protein_coding	6396.14	6958.01	1.08785	0.121473	0.0227127	0.251358
ENSRNOG00000018994	1	84978206	84986581	-	Psmc4	protein_coding	842.337	946.58	1.12375	0.168326	0.0228818	0.251358
ENSRNOG00000008713	7	26522314	26607861	+	Slc41a2	protein_coding	419.928	358.038	0.852617	-0.230031	0.0228052	0.251358
ENSRNOG00000013391	16	49626205	49820235	-	Sorbs2	protein_coding	3123.8	2808.76	0.89915	-0.153366	0.0229018	0.251358
ENSRNOG00000007400	7	123381077	123438603	+	Srebf2	protein_coding	3499.54	3115.1	0.890148	-0.167883	0.0228117	0.251358
ENSRNOG00000046984	3	11629556	11641466	+	St6galnac6	protein_coding	1408.59	1561.28	1.1084	0.148476	0.0228646	0.251358
ENSRNOG00000015155	3	161243587	161246351	-	Tnnc2	protein_coding	49.6032	72.7664	1.46697	0.552838	0.0228934	0.251358
ENSRNOG00000018808	1	42169501	42177579	+	Vip	protein_coding	331.234	398.778	1.20392	0.267734	0.0226082	0.251358
ENSRNOG00000014235	3	176865156	176881549	+	Zgpat	protein_coding	276.713	226.258	0.817662	-0.290423	0.0228921	0.251358
ENSRNOG00000049127	9	30068659	30161578	-	Smap1	protein_coding	1380.06	1231.71	0.892506	-0.164066	0.0230039	0.252222
ENSRNOG00000004591	7	129798663	129812388	-	Alg12	protein_coding	130.996	98.5616	0.7524	-0.410429	0.0231092	0.253118
ENSRNOG00000049142	9	10972351	10991927	-	Hdgfrp2	protein_coding	850.106	745.981	0.877515	-0.188504	0.023145	0.253252
ENSRNOG00000032034	1	85438105	85466635	+	Supt5h	protein_coding	2124.25	1931.71	0.909361	-0.137075	0.0231949	0.253539
ENSRNOG00000007596	10	70157621	70220582	-	Rffl	protein_coding	189.123	146.106	0.772546	-0.372307	0.0234199	0.255738
ENSRNOG00000008728	6	126874193	127064626	+	Unc79	protein_coding	918.417	816.802	0.889358	-0.169163	0.0235947	0.257386
ENSRNOG00000053270	3	123154669	123157084	-	AABR07053741.1	pseudogene	61.3843	86.8931	1.41556	0.501372	0.0236768	0.25802
ENSRNOG00000014846	8	67295727	67333247	+	Anp32a	protein_coding	1196.97	1332.39	1.11314	0.154635	0.023749	0.258415
ENSRNOG00000019955	16	8497569	8523557	+	Ogdhl	protein_coding	1102.41	986.476	0.894833	-0.16031	0.0237612	0.258415
ENSRNOG00000021106	1	89563976	89590490	-	Gramd1a	protein_coding	1000.11	893.016	0.892919	-0.163399	0.0238127	0.258713
ENSRNOG00000018709	14	83510278	83528898	+	Patz1	protein_coding	296.596	244.792	0.825338	-0.276943	0.0238821	0.259205
ENSRNOG00000055756	X	157095937	157126393	+	Bcap31	protein_coding	585.207	670.948	1.14651	0.197254	0.024056	0.26083
ENSRNOG00000004956	10	37270183	37311625	-	Jade2	protein_coding	504.788	578.936	1.14689	0.197726	0.0241348	0.261157
ENSRNOG00000033389	20	13965114	13972547	+	Susd2	protein_coding	156.734	118.356	0.755138	-0.405187	0.0241111	0.261157
ENSRNOG00000026953	2	219258347	219262901	-	Gpr88	protein_coding	740.601	839.742	1.13387	0.181249	0.0242257	0.261876
ENSRNOG00000010637	9	1145700	1746397	+	Tbc1d5	protein_coding	548.244	469.624	0.856598	-0.22331	0.0242567	0.261948
ENSRNOG00000003809	X	43625169	43629765	+	Sat1	protein_coding	545.558	639.739	1.17263	0.229751	0.0244735	0.264024
ENSRNOG00000037483	12	51948650	52055271	+	Ep400	protein_coding	1355.29	1208.86	0.891957	-0.164953	0.0245481	0.264215
ENSRNOG00000019205	19	57614628	57640726	+	Gnpat	protein_coding	708.168	798.132	1.12704	0.172535	0.024565	0.264215
ENSRNOG00000024730	10	74548270	74679858	-	Ppm1e	protein_coding	1129.58	1014.51	0.898136	-0.154994	0.0245465	0.264215
ENSRNOG00000017417	10	56601288	56604221	+	Gabarap	protein_coding	1270.11	1402.28	1.10407	0.142829	0.0245949	0.264272
ENSRNOG00000039850	11	34592121	34598275	-	Pigp	protein_coding	99.2725	130.618	1.31575	0.395884	0.0247725	0.265738
ENSRNOG00000010628	4	145686193	145699577	-	Sec13	protein_coding	312.808	368.467	1.17793	0.236258	0.0247808	0.265738
ENSRNOG00000017758	2	189400696	189413608	+	LOC361985	protein_coding	572.322	653.303	1.1415	0.190925	0.024811	0.265797
ENSRNOG00000017758	2	189400696	189413608	+	LOC361985	protein_coding	572.322	653.303	1.1415	0.190925	0.024811	0.265797
ENSRNOG00000033508	10	57185347	57238531	+	Mink1	protein_coding	5325.78	5725.14	1.07499	0.104317	0.0249155	0.26665
ENSRNOG00000002524	4	51822153	51844331	-	Gpr37	protein_coding	676.724	490.437	0.724723	-0.464498	0.0250511	0.267835
ENSRNOG00000055760	2	145936827	145937813	+	Eif3i-ps1	pseudogene	324.697	389.781	1.20045	0.263571	0.025195	0.268571
ENSRNOG00000021395	3	103192683	103193333	+	LOC100363452	protein_coding	172.455	215.278	1.24832	0.319983	0.0251904	0.268571
ENSRNOG00000009643	10	86711240	86721246	+	Msl1	protein_coding	1189.57	1314.71	1.1052	0.144307	0.0251852	0.268571
ENSRNOG00000000638	20	22060224	22086108	+	Zfp365	protein_coding	3998.05	4320.82	1.08073	0.112011	0.0252347	0.268729
ENSRNOG00000014302	5	145257714	145304536	+	Dlgap3	protein_coding	2525.78	2750.65	1.08903	0.123044	0.025313	0.268763
ENSRNOG00000020119	18	29987206	30215897	+	Pcdha13	protein_coding	2012.44	1813.61	0.9012	-0.150081	0.0252803	0.268763
ENSRNOG00000020119	18	29987206	30215897	+	Pcdha13	protein_coding	2012.44	1813.61	0.9012	-0.150081	0.0252803	0.268763
ENSRNOG00000020119	18	29987206	30215897	+	Pcdha13	protein_coding	2012.44	1813.61	0.9012	-0.150081	0.0252803	0.268763
ENSRNOG00000020119	18	29987206	30215897	+	Pcdha13	protein_coding	2012.44	1813.61	0.9012	-0.150081	0.0252803	0.268763
ENSRNOG00000020119	18	29987206	30215897	+	Pcdha13	protein_coding	2012.44	1813.61	0.9012	-0.150081	0.0252803	0.268763
ENSRNOG00000020119	18	29987206	30215897	+	Pcdha13	protein_coding	2012.44	1813.61	0.9012	-0.150081	0.0252803	0.268763
ENSRNOG00000020119	18	29987206	30215897	+	Pcdha13	protein_coding	2012.44	1813.61	0.9012	-0.150081	0.0252803	0.268763
ENSRNOG00000020119	18	29987206	30215897	+	Pcdha13	protein_coding	2012.44	1813.61	0.9012	-0.150081	0.0252803	0.268763
ENSRNOG00000020119	18	29987206	30215897	+	Pcdha13	protein_coding	2012.44	1813.61	0.9012	-0.150081	0.0252803	0.268763
ENSRNOG00000020119	18	29987206	30215897	+	Pcdha13	protein_coding	2012.44	1813.61	0.9012	-0.150081	0.0252803	0.268763
ENSRNOG00000013431	4	10748745	10809142	+	Rsbn1l	protein_coding	178.297	139.021	0.779716	-0.35898	0.0253014	0.268763
ENSRNOG00000017895	5	167288223	167299609	+	Eno1	protein_coding	8481.42	9186.51	1.08313	0.115211	0.0253462	0.26885
ENSRNOG00000048145	6	79254339	79258611	+	Sstr1	protein_coding	710.601	617.454	0.868918	-0.202708	0.0253851	0.268997
ENSRNOG00000000634	20	21316826	21426034	+	RGD1306739	protein_coding	85.6793	115.234	1.34494	0.427545	0.0254801	0.269738
ENSRNOG00000016272	3	2781169	2785474	+	Edf1	protein_coding	908.657	1028.02	1.13136	0.17806	0.0255479	0.27019
ENSRNOG00000011984	17	9109731	9117750	+	Cxcl14	protein_coding	407.146	478.463	1.17516	0.232861	0.0256532	0.271036
ENSRNOG00000010807	7	74723179	74735650	-	Cox6c	protein_coding	1396.48	1546.09	1.10713	0.146831	0.0257118	0.271346
ENSRNOG00000002349	14	39661968	39798302	+	Gabra2	protein_coding	961.675	1073.51	1.1163	0.158719	0.025733	0.271346
ENSRNOG00000029726	2	210803869	210809306	-	Gstm1	protein_coding	973.286	1091.53	1.12149	0.165417	0.0258177	0.271828
ENSRNOG00000056487	7	80351774	80788094	+	Oxr1	protein_coding	4630.3	4280.29	0.924409	-0.113397	0.0258294	0.271828
ENSRNOG00000043388	1	100992405	100997198	+	Irf3	protein_coding	218.282	176.263	0.807502	-0.308462	0.0259549	0.272658
ENSRNOG00000021392	5	173660921	173672459	+	Noc2l	protein_coding	601.64	520.619	0.865333	-0.208673	0.0259589	0.272658
ENSRNOG00000006733	13	48068158	48286720	-	Srgap2	protein_coding	728.638	632.626	0.868232	-0.203848	0.025994	0.27276
ENSRNOG00000000981	12	36694960	36761455	+	Scarb1	protein_coding	444.83	381.879	0.858483	-0.220139	0.0261017	0.273622
ENSRNOG00000015691	2	208170652	208185965	+	Fam212b	protein_coding	1689.62	1867.11	1.10505	0.144111	0.0261524	0.273886
ENSRNOG00000010653	6	107633716	107678156	-	Elmsan1	protein_coding	260.019	311.409	1.19764	0.260195	0.0262748	0.274181
ENSRNOG00000018676	18	70974885	70983360	+	RGD1562987	protein_coding	621.718	706.365	1.13615	0.184154	0.0262609	0.274181
ENSRNOG00000057221	8	44136496	44159010	+	Scn3b	protein_coding	2522.01	2757.65	1.09343	0.128863	0.026215	0.274181
ENSRNOG00000020489	1	82174451	82184068	+	Tmem145	protein_coding	540.608	468.297	0.866242	-0.207158	0.0262826	0.274181
ENSRNOG00000014289	9	81518176	81548871	+	Arpc2	protein_coding	1893.7	2070.09	1.09315	0.128489	0.0264189	0.274881
ENSRNOG00000020277	10	89089646	89103614	+	Cntnap1	protein_coding	4524.36	4183.47	0.924654	-0.113015	0.0264264	0.274881
ENSRNOG00000031834	3	176444544	176465162	-	Nkain4	protein_coding	218.149	263.205	1.20654	0.270874	0.0264249	0.274881
ENSRNOG00000003653	13	93651484	93677377	-	Fh	protein_coding	663.392	749.156	1.12928	0.175405	0.0265612	0.275483
ENSRNOG00000014079	9	54287541	54484533	-	Stat1	protein_coding	360.362	420.489	1.16685	0.222621	0.0265326	0.275483
ENSRNOG00000014079	9	54287541	54484533	-	Stat1	protein_coding	360.362	420.489	1.16685	0.222621	0.0265326	0.275483
ENSRNOG00000006324	8	6811543	6917535	+	Trpc6	protein_coding	323.663	384.201	1.18704	0.247367	0.026545	0.275483
ENSRNOG00000059402	6	43348958	43363335	-	Itgb1bp1	protein_coding	190.023	233.422	1.22839	0.29677	0.026592	0.275536
ENSRNOG00000001374	12	41416218	41448668	-	Rasal1	protein_coding	1637.46	1471.3	0.898529	-0.154364	0.0266292	0.275655
ENSRNOG00000020340	18	27398688	27424090	-	Brd8	protein_coding	706.372	620.024	0.877758	-0.188104	0.0267435	0.276573
ENSRNOG00000039783	1	31527646	31528083	-	Rpl26-ps2	protein_coding	246.884	298.531	1.20919	0.274046	0.0268215	0.277112
ENSRNOG00000027271	10	95642640	95657977	+	RGD1359290	protein_coding	145.016	184.624	1.27313	0.348383	0.0268754	0.277403
ENSRNOG00000008146	3	159569363	159694756	+	Tox2	protein_coding	312.948	259.403	0.828902	-0.270726	0.0269521	0.277928
ENSRNOG00000018536	15	34216833	34224193	+	Pck2	protein_coding	277.724	230.619	0.830389	-0.26814	0.0270208	0.278369
ENSRNOG00000029450	7	115766486	115828514	+	Adgrb1	processed_transcript	4378.06	4031.13	0.920756	-0.119109	0.0271736	0.279497
ENSRNOG00000016680	17	9844133	9952898	-	Nsd1	protein_coding	1674.05	1506.81	0.900099	-0.151844	0.0271823	0.279497
ENSRNOG00000004226	7	64923615	64982281	-	Irak3	protein_coding	88.9987	63.1793	0.70989	-0.494332	0.0272387	0.279672
ENSRNOG00000052157	7	52165233	52404774	-	Nav3	protein_coding	1490.12	1321.02	0.88652	-0.173775	0.0272515	0.279672
ENSRNOG00000042411	5	152078220	152122684	-	Rps6ka1	protein_coding	117.815	86.9417	0.73795	-0.438405	0.0272805	0.279703
ENSRNOG00000001404	12	22082057	22118220	+	Agfg2	protein_coding	326.251	382.72	1.17308	0.230307	0.0273567	0.280217
ENSRNOG00000021745	2	102685513	102688624	+	Bhlhe22	protein_coding	257.691	317.268	1.23119	0.300059	0.0275434	0.281719
ENSRNOG00000018186	2	210034095	210039451	+	Lamtor5	protein_coding	281.108	335.814	1.19461	0.256538	0.0275805	0.281719
ENSRNOG00000002886	10	55275411	55406732	+	Myh10	protein_coding	6479	6005.62	0.926936	-0.109458	0.0275819	0.281719
ENSRNOG00000042245	10	94231585	94254046	+	Dcaf7	protein_coding	1971.46	1799.13	0.912586	-0.131967	0.0277445	0.282561
ENSRNOG00000007975	5	5616483	5694598	+	Ncoa2	protein_coding	713.411	627.842	0.880057	-0.184332	0.0277659	0.282561
ENSRNOG00000008447	12	31934343	32607370	+	Tmem132d	protein_coding	345.47	291.414	0.84353	-0.245488	0.0277696	0.282561
ENSRNOG00000015496	16	19385736	19399903	-	Tpm4	protein_coding	145.385	182.402	1.25461	0.327239	0.0276944	0.282561
ENSRNOG00000005157	X	33648682	33665821	-	Rbbp7	protein_coding	1218.9	1347.03	1.10511	0.144194	0.027801	0.282613
ENSRNOG00000001049	15	57891680	57894504	+	Tpt1	protein_coding	3303.95	3630.32	1.09878	0.135906	0.0278397	0.282739
ENSRNOG00000020130	1	81779380	81797236	+	Arhgef1	protein_coding	317.388	266.647	0.840129	-0.251317	0.02795	0.283324
ENSRNOG00000001410	12	22236165	22245100	-	Gigyf1	protein_coding	507.776	437.445	0.861493	-0.215089	0.0279764	0.283324
ENSRNOG00000016105	9	79659251	79748078	+	Xrcc5	protein_coding	169.257	208.653	1.23276	0.301894	0.0279744	0.283324
ENSRNOG00000002610	10	7041510	7055101	+	Carhsp1	protein_coding	266.211	213.055	0.800324	-0.321343	0.0280112	0.283409
ENSRNOG00000007671	5	57042705	57061365	-	Smu1	protein_coding	427.616	494.129	1.15554	0.208571	0.0281806	0.284523
ENSRNOG00000002434	10	77537340	77543192	+	Tmem100	protein_coding	99.0574	131.81	1.33064	0.412118	0.0282007	0.284523
ENSRNOG00000027317	6	108820774	108897426	+	Ylpm1	protein_coding	1466.26	1321.66	0.901378	-0.149796	0.02818	0.284523
ENSRNOG00000017354	4	71740532	71749386	+	Zyx	protein_coding	536.653	460.185	0.857509	-0.221776	0.0282477	0.284729
ENSRNOG00000008555	5	16706082	16706909	-	Rps20	protein_coding	568.886	655.061	1.15148	0.20349	0.0282768	0.284756
ENSRNOG00000000695	12	48403797	48446977	+	Ssh1	protein_coding	168.263	133.285	0.792125	-0.3362	0.0283109	0.284832
ENSRNOG00000001715	11	83948230	83964055	-	Ece2	protein_coding	136.252	102.063	0.749075	-0.416817	0.0283839	0.285037
ENSRNOG00000031852	11	58803140	59110562	-	Lsamp	protein_coding	1056.69	948.366	0.897487	-0.156037	0.0283844	0.285037
ENSRNOG00000000010	19	20607507	20611316	+	Cbln1	protein_coding	162.156	126.826	0.782121	-0.354536	0.0284644	0.285546
ENSRNOG00000019005	1	143036218	143159433	+	Pde8a	protein_coding	78.9645	55.3832	0.701368	-0.511756	0.0285147	0.285546
ENSRNOG00000005929	7	115956276	115959453	+	Them6	protein_coding	308.985	259.183	0.838823	-0.253562	0.0285056	0.285546
ENSRNOG00000033397	7	135466884	135630654	-	Adamts20	protein_coding	156.404	121.042	0.773906	-0.369771	0.0285422	0.285555
ENSRNOG00000007443	3	130079361	130114770	-	Jag1	protein_coding	74.0621	50.4516	0.681206	-0.553836	0.028701	0.286876
ENSRNOG00000031974	2	136993208	137014492	+	Pcdh10	protein_coding	2062.99	1877.46	0.910067	-0.135955	0.02874	0.286963
ENSRNOG00000015717	1	207887209	207987136	+	Ptpre	protein_coding	235.456	192.903	0.819275	-0.28758	0.0287631	0.286963
ENSRNOG00000015455	4	116912351	116916236	-	Spr	protein_coding	96.3349	125.875	1.30664	0.385865	0.028842	0.287484
ENSRNOG00000018854	9	93731436	93735636	-	Nppc	protein_coding	73.4288	49.8315	0.678636	-0.55929	0.0288796	0.287591
ENSRNOG00000016679	1	188195416	188245628	-	Tmc7	protein_coding	109.668	81.7743	0.745657	-0.423416	0.0289063	0.287591
ENSRNOG00000025209	4	147854309	147893992	-	Plxnd1	protein_coding	390.991	333.811	0.853757	-0.228103	0.0289897	0.288154
ENSRNOG00000022307	5	173340060	173354755	+	Acap3	protein_coding	1686.82	1524.46	0.903749	-0.146006	0.0291073	0.288912
ENSRNOG00000003942	9	53004499	53009054	+	Asnsd1	protein_coding	331.289	387.352	1.16923	0.225556	0.0291197	0.288912
ENSRNOG00000001766	11	71397383	71419223	-	Tfrc	protein_coding	1028.34	916.993	0.891717	-0.165342	0.02923	0.289738
ENSRNOG00000049221	9	10653216	10734073	-	Kdm4b	protein_coding	850.081	755.428	0.888654	-0.170306	0.0292812	0.289978
ENSRNOG00000017030	1	45923222	46233374	+	Arid1b	protein_coding	872.415	768.385	0.880756	-0.183185	0.0295313	0.290604
ENSRNOG00000031475	5	148257642	148311645	+	Col16a1	protein_coding	120.659	86.9311	0.720468	-0.472994	0.0296639	0.290604
ENSRNOG00000030237	2	14699882	14701903	-	Cox7c	protein_coding	856.88	957.199	1.11708	0.159726	0.0294915	0.290604
ENSRNOG00000033026	8	119691388	119744506	+	Dclk3	protein_coding	335.872	280.26	0.834423	-0.261149	0.0295799	0.290604
ENSRNOG00000010086	3	148709531	148722742	-	Plagl2	protein_coding	91.0719	119.668	1.31399	0.393956	0.0296098	0.290604
ENSRNOG00000017730	9	93080615	93155027	+	Psmd1	protein_coding	2092.9	2278.28	1.08857	0.122437	0.029515	0.290604
ENSRNOG00000006180	6	33786197	33865687	+	Pum2	protein_coding	2425.24	2645.98	1.09102	0.125672	0.0295229	0.290604
ENSRNOG00000021261	3	124575621	124610267	-	Rassf2	protein_coding	190.949	234.063	1.22579	0.293708	0.0296736	0.290604
ENSRNOG00000002364	10	47719014	47725172	-	Rnf112	protein_coding	1833.15	1678.84	0.915826	-0.126855	0.029696	0.290604
ENSRNOG00000000438	20	4366246	4368693	-	Rnf5	protein_coding	519.546	595.572	1.14633	0.197024	0.0296633	0.290604
ENSRNOG00000050090	2	210249663	210299770	-	Slc6a17	protein_coding	8657.1	7916.55	0.914458	-0.129012	0.0296676	0.290604
ENSRNOG00000002468	13	77485113	77678437	+	Tnr	protein_coding	1651.54	1484.66	0.898956	-0.153678	0.0296135	0.290604
ENSRNOG00000000470	20	5432004	5441706	-	Vps52	protein_coding	878.125	781.649	0.890135	-0.167904	0.0294467	0.290604
ENSRNOG00000045968	17	36438459	36438752	-	RGD1561310	protein_coding	230.109	284.441	1.23612	0.305814	0.0297353	0.290724
ENSRNOG00000037165	5	153807955	153840178	-	Nipal3	protein_coding	870.115	776.304	0.892186	-0.164584	0.0298187	0.291274
ENSRNOG00000012988	1	59156251	59214452	+	Lix1	protein_coding	532.908	613.715	1.15163	0.203681	0.0299309	0.291869
ENSRNOG00000005342	13	47956790	48022333	-	Rassf5	protein_coding	674.993	582.348	0.862747	-0.21299	0.0299611	0.291869
ENSRNOG00000011568	1	30681681	30766860	+	Rspo3	protein_coding	274.96	227.697	0.828111	-0.272103	0.0299387	0.291869
ENSRNOG00000001034	12	2587891	2626310	-	Evi5l	protein_coding	849.348	754.591	0.888436	-0.17066	0.0300835	0.291875
ENSRNOG00000025463	8	57248620	57255263	-	LOC100125362	protein_coding	2530.79	2307.96	0.911954	-0.132967	0.030052	0.291875
ENSRNOG00000011560	15	46693383	46719252	-	Mtmr9	protein_coding	1583.66	1444.19	0.911932	-0.133001	0.0300967	0.291875
ENSRNOG00000007925	3	110442637	110487526	+	Pak6	protein_coding	920.736	1023.76	1.11189	0.153012	0.0300975	0.291875
ENSRNOG00000003951	6	124123228	124135658	+	Psmc1	protein_coding	1717.62	1895.65	1.10365	0.142285	0.0299929	0.291875
ENSRNOG00000008291	6	3743074	3794501	-	Thumpd2	protein_coding	122.661	91.833	0.748671	-0.417596	0.030182	0.292167
ENSRNOG00000061121	14	9141512	9381870	+	Wdfy3	protein_coding	2875.38	2571.97	0.894483	-0.160875	0.0301677	0.292167
ENSRNOG00000019400	8	116980497	116993193	-	Dag1	protein_coding	1353.71	1221.59	0.902398	-0.148164	0.0304236	0.293388
ENSRNOG00000011523	17	9282675	9344678	+	H2afy	protein_coding	719.711	816.298	1.1342	0.181677	0.0304682	0.293388
ENSRNOG00000006859	4	342302	350515	+	Insig1	protein_coding	975.442	1090.1	1.11755	0.160338	0.0304149	0.293388
ENSRNOG00000014961	5	161947137	161981441	-	Pdpn	protein_coding	112.867	148.083	1.31201	0.391775	0.0304184	0.293388
ENSRNOG00000000464	20	3823042	3829140	+	Rxrb	protein_coding	660.312	578.597	0.876248	-0.190589	0.0303512	0.293388
ENSRNOG00000017871	8	50230339	50246656	-	Sidt2	protein_coding	1047.28	928.06	0.886162	-0.174358	0.0304719	0.293388
ENSRNOG00000009910	1	174862698	174924078	+	Swap70	protein_coding	153.109	190.323	1.24306	0.313893	0.0305363	0.293744
ENSRNOG00000053272	13	51022681	51030802	+	Chi3l1	protein_coding	599.837	685.543	1.14288	0.192676	0.0305752	0.293856
ENSRNOG00000049900	19	59499876	59502161	-	Irf2bp2	protein_coding	162.98	201.199	1.2345	0.303928	0.0306755	0.294294
ENSRNOG00000011675	1	62555188	62558033	-	Zfp40	protein_coding	154.368	115.354	0.747268	-0.420301	0.0306651	0.294294
ENSRNOG00000033835	3	11338083	11382043	-	Dnm1	protein_coding	17487.8	16121.6	0.921882	-0.117346	0.0307145	0.294405
ENSRNOG00000021256	3	124129558	124145566	-	Adra1d	protein_coding	694.303	597.325	0.860323	-0.21705	0.030865	0.295583
ENSRNOG00000005519	4	21317695	21560490	+	Grm3	protein_coding	1034.98	906.13	0.875503	-0.191816	0.0309533	0.296164
ENSRNOG00000012061	1	192233910	192574831	+	Prkcb	protein_coding	4139.98	3824.13	0.923708	-0.114491	0.0309922	0.296273
ENSRNOG00000006060	7	72985495	73207695	+	Matn2	protein_coding	183.71	225.037	1.22496	0.292734	0.0310287	0.296359
ENSRNOG00000060407	7	121511097	121619283	+	Cacna1i	processed_transcript	1737.66	1581.12	0.909915	-0.136197	0.031118	0.296421
ENSRNOG00000014684	2	189840403	189856090	-	Npr1	protein_coding	98.7433	70.2715	0.711658	-0.490743	0.0311095	0.296421
ENSRNOG00000000956	12	9985928	9990284	-	Rasl11a	protein_coding	60.7396	84.5273	1.39163	0.476781	0.0311129	0.296421
ENSRNOG00000012808	7	12771227	12779862	-	Tmem259	protein_coding	750.46	662.837	0.883241	-0.179121	0.031146	0.296425
ENSRNOG00000016443	5	162891451	163119239	-	Vps13d	protein_coding	2077.15	1881.97	0.906036	-0.14236	0.0312003	0.296679
ENSRNOG00000019321	8	130120523	130127392	-	Cck	protein_coding	4904.8	5315.42	1.08372	0.115991	0.0313503	0.297842
ENSRNOG00000018305	18	59748444	59755226	+	St8sia3	protein_coding	632.732	553.735	0.875149	-0.1924	0.0314858	0.298865
ENSRNOG00000018404	19	43193257	43215281	-	Aars	protein_coding	2929.32	2679.77	0.914811	-0.128455	0.0315301	0.299021
ENSRNOG00000001135	12	44942443	44962656	-	Wsb2	protein_coding	2269.04	2465.27	1.08648	0.119662	0.0316177	0.299588
ENSRNOG00000004823	6	60566196	60782556	+	Dock4	protein_coding	1159.38	1037.39	0.894779	-0.160397	0.031651	0.299639
ENSRNOG00000000823	20	27832932	27879759	+	Gcc2	protein_coding	881.426	984.822	1.11731	0.160023	0.0317609	0.300209
ENSRNOG00000017309	5	153260930	153264669	+	Rsrp1	protein_coding	2561.81	2282.81	0.891094	-0.166351	0.0317671	0.300209
ENSRNOG00000033568	10	14260787	14299167	-	Mapk8ip3	protein_coding	5460.63	5029.34	0.921018	-0.118698	0.0318609	0.30083
ENSRNOG00000039829	15	18625964	18632536	-	Rpp14	protein_coding	251.712	299.969	1.19171	0.253035	0.0319273	0.301193
ENSRNOG00000000622	10	40208223	40211975	+	Hint1	protein_coding	823.312	926.16	1.12492	0.169821	0.0320701	0.302275
ENSRNOG00000052376	9	38297322	38351024	+	Bend6	protein_coding	1601.05	1753.43	1.09517	0.131159	0.0322204	0.302629
ENSRNOG00000018044	17	77287188	77304530	-	Phyh	protein_coding	440.623	511.779	1.16149	0.215978	0.0321867	0.302629
ENSRNOG00000009982	15	27875911	27883350	+	Pnp	protein_coding	455.528	530.776	1.16519	0.220563	0.0321432	0.302629
ENSRNOG00000019968	1	266255797	266270694	+	Trim8	protein_coding	900.498	1004.71	1.11573	0.157985	0.0321961	0.302629
ENSRNOG00000034233	11	71116579	71136673	-	Fyttd1	protein_coding	495.302	567.101	1.14496	0.195297	0.0323928	0.303984
ENSRNOG00000030871	15	65506874	65507968	-	Calm2	protein_coding	6794.79	7299.61	1.0743	0.10339	0.0325559	0.305093
ENSRNOG00000021044	10	90421442	90501819	-	Gpatch8	protein_coding	763.318	678.968	0.889496	-0.168941	0.032572	0.305093
ENSRNOG00000030877	X	118084890	118318039	+	Htr2c	protein_coding	479.876	412.404	0.859397	-0.218603	0.032653	0.305093
ENSRNOG00000014508	4	120671489	120771088	+	Mgll	protein_coding	1082.81	1198.7	1.10703	0.14669	0.0326462	0.305093
ENSRNOG00000012414	2	2627393	2683116	-	Rhobtb3	protein_coding	78.1287	55.4121	0.709242	-0.495651	0.0326079	0.305093
ENSRNOG00000001465	8	69449801	69466618	-	Ids	protein_coding	2523.14	2773.9	1.09939	0.136699	0.0327263	0.305512
ENSRNOG00000015077	19	55594831	55635122	+	Acsf3	protein_coding	244.619	201.432	0.823451	-0.280245	0.0329718	0.307537
ENSRNOG00000009198	8	111600532	111668808	+	Rab6b	protein_coding	13223.9	12247.9	0.926194	-0.110613	0.0330444	0.307946
ENSRNOG00000005285	6	80302303	80334522	-	Fbxo33	protein_coding	415.358	478.187	1.15127	0.20322	0.0332335	0.308155
ENSRNOG00000051490	3	156727642	156758307	+	Plcg1	protein_coding	1370.01	1245.87	0.909389	-0.13703	0.0332281	0.308155
ENSRNOG00000005124	6	7793735	7893769	+	Plekhh2	protein_coding	419.53	358.788	0.855215	-0.22564	0.0332434	0.308155
ENSRNOG00000012502	9	60399304	60430139	-	Stk17b	protein_coding	79.9892	107.377	1.34239	0.424807	0.0332477	0.308155
ENSRNOG00000047053	8	28045093	28054040	+	Thyn1	protein_coding	388.429	451.085	1.16131	0.215748	0.0332676	0.308155
ENSRNOG00000007040	13	52124635	52136127	-	Timm17a	protein_coding	381.673	449.312	1.17722	0.23538	0.0332261	0.308155
ENSRNOG00000007040	13	52124635	52136127	-	Timm17a	protein_coding	381.673	449.312	1.17722	0.23538	0.0332261	0.308155
ENSRNOG00000015913	2	244058186	244224058	+	Tspan5	protein_coding	1778.79	1616.98	0.909035	-0.137593	0.0332593	0.308155
ENSRNOG00000018960	1	41608418	42077535	-	Syne1	processed_transcript	7718.82	7070.3	0.915981	-0.12661	0.0333126	0.308307
ENSRNOG00000018944	1	253119112	253185533	-	Pank1	protein_coding	226.478	182.98	0.807934	-0.307691	0.0333849	0.30871
ENSRNOG00000060350	4	123307624	123453478	+	Iqsec1	protein_coding	3035.42	2779.63	0.915731	-0.127004	0.0335444	0.309918
ENSRNOG00000018985	1	219536220	219544328	-	Adrbk1	protein_coding	2573.91	2780.02	1.08008	0.111136	0.0336694	0.309955
ENSRNOG00000060105	5	81179605	82168427	-	Astn2	protein_coding	325.064	273.407	0.841086	-0.249674	0.0336326	0.309955
ENSRNOG00000018198	17	4297224	4454778	-	Dapk1	protein_coding	1118.17	1011.56	0.904657	-0.144558	0.0336524	0.309955
ENSRNOG00000018097	5	157820908	157846226	+	Emc1	protein_coding	1058.44	946.209	0.893964	-0.161711	0.0337057	0.309955
ENSRNOG00000034066	8	44990014	44993179	+	Hspa8	protein_coding	11443.2	12347.7	1.07905	0.109758	0.0337419	0.309955
ENSRNOG00000025589	15	33768595	33775109	-	Jph4	protein_coding	1913.47	2079.84	1.08694	0.120277	0.0337503	0.309955
ENSRNOG00000001299	12	17488487	17522534	-	Sun1	protein_coding	1142.65	1027.27	0.899028	-0.153562	0.0335784	0.309955
ENSRNOG00000053075	1	213870502	213881917	+	B4galnt4	protein_coding	1089.07	980.176	0.900009	-0.151989	0.0338264	0.310124
ENSRNOG00000019875	18	28361283	28390717	+	Matr3	protein_coding	2749.54	2979.91	1.08379	0.116079	0.03382	0.310124
ENSRNOG00000025604	7	97984862	98026052	+	Atad2	protein_coding	129.229	162.593	1.25818	0.331341	0.0339908	0.31057
ENSRNOG00000028993	X	1345684	1346181	-	LOC102555453	protein_coding	236.782	286.99	1.21204	0.27744	0.0339161	0.31057
ENSRNOG00000000394	20	32120320	32139789	-	Srgn	protein_coding	55.6077	77.9108	1.40108	0.486538	0.0339729	0.31057
ENSRNOG00000018416	9	16862248	16902199	+	Ttbk1	protein_coding	1399.33	1546.48	1.10516	0.144257	0.0339423	0.31057
ENSRNOG00000025459	7	70585013	70602310	-	Mars	protein_coding	1009.86	910.416	0.90153	-0.149552	0.0340387	0.310744
ENSRNOG00000019987	3	152381665	152382529	-	Scand1	protein_coding	288.834	354.277	1.22658	0.29464	0.0341017	0.311055
ENSRNOG00000024757	8	12900830	12902262	-	Endod1	protein_coding	330.653	280.143	0.847241	-0.239156	0.0341999	0.311154
ENSRNOG00000016507	4	118167294	118174842	+	LOC687679	protein_coding	106.001	137.962	1.30151	0.380189	0.0342284	0.311154
ENSRNOG00000016507	4	118167294	118174842	+	LOC687679	protein_coding	106.001	137.962	1.30151	0.380189	0.0342284	0.311154
ENSRNOG00000014568	10	14090128	14092289	-	Ndufb10	protein_coding	822.806	923.386	1.12224	0.166382	0.0342281	0.311154
ENSRNOG00000056946	1	100997745	101008266	-	Scaf1	protein_coding	2366.06	2176.56	0.919909	-0.120437	0.0342152	0.311154
ENSRNOG00000020882	1	84154703	84168074	-	Shkbp1	protein_coding	77.0989	55.047	0.713978	-0.486048	0.0343006	0.311547
ENSRNOG00000042753	X	142053654	142248369	-	Fgf13	protein_coding	1258.1	1396.58	1.11007	0.150646	0.0345017	0.313108
ENSRNOG00000013917	2	149533151	149564113	-	Igsf10	protein_coding	195.156	156.616	0.802513	-0.317403	0.0347599	0.313691
ENSRNOG00000021053	1	89383519	89399041	-	Lsr	protein_coding	71.5642	97.2821	1.35937	0.442937	0.0347702	0.313691
ENSRNOG00000015445	3	120209647	120233655	-	Mal	protein_coding	1385.71	868.949	0.62708	-0.673279	0.0346926	0.313691
ENSRNOG00000008845	3	148487059	148493225	-	Pdrg1	protein_coding	410.424	473.817	1.15446	0.207215	0.0346421	0.313691
ENSRNOG00000015353	2	227657983	227717884	+	Prss12	protein_coding	195.418	148.533	0.760077	-0.395782	0.034721	0.313691
ENSRNOG00000021164	1	222274133	222293148	-	Stip1	protein_coding	2086.94	2276.33	1.09075	0.125325	0.0345961	0.313691
ENSRNOG00000003562	13	101181994	101307908	+	Susd4	protein_coding	1424.96	1566.08	1.09903	0.136228	0.0347398	0.313691
ENSRNOG00000008767	5	117877594	117931003	+	Atg4c	protein_coding	192.122	232.351	1.20939	0.274279	0.034901	0.314607
ENSRNOG00000051706	15	27751180	27798839	-	Tep1	protein_coding	218.59	179.615	0.821696	-0.283324	0.0349554	0.314833
ENSRNOG00000003772	7	53630621	53649310	+	Csrp2	protein_coding	112.73	85.3877	0.757453	-0.400771	0.0350447	0.315373
ENSRNOG00000017917	17	10415123	10439691	-	Cdhr2	protein_coding	82.1727	59.5762	0.725013	-0.463922	0.0351061	0.315661
ENSRNOG00000018309	4	157612536	157645659	+	Chd4	protein_coding	2099.42	1917.73	0.913458	-0.13059	0.0351453	0.31575
ENSRNOG00000019276	18	31396922	31409907	+	RGD735029	protein_coding	646.342	737.163	1.14052	0.189688	0.0351774	0.315774
ENSRNOG00000060293	1	64172540	64175099	-	Ndufa3	protein_coding	618.608	696.281	1.12556	0.170644	0.0352362	0.316037
ENSRNOG00000000166	X	23146085	23166675	+	Apex2	protein_coding	49.8595	70.7144	1.41827	0.504135	0.0352794	0.316161
ENSRNOG00000002632	7	2458264	2470674	+	Naca	protein_coding	1441.46	1591.6	1.10416	0.142953	0.0353592	0.316612
ENSRNOG00000018606	1	167906061	167911961	-	Olr59	protein_coding	216.823	178.165	0.821706	-0.283305	0.0354517	0.316912
ENSRNOG00000004806	6	1237758	1319541	-	Strn	protein_coding	647.368	573.662	0.886145	-0.174385	0.035425	0.316912
ENSRNOG00000004697	7	77763512	77837453	+	Baalc	protein_coding	1819.26	1983.74	1.09041	0.124873	0.0355372	0.317412
ENSRNOG00000012014	15	52271496	52288893	-	Fam160b2	protein_coding	423.355	364.367	0.860665	-0.216477	0.0356083	0.317784
ENSRNOG00000004322	X	37790586	38196204	-	Sh3kbp1	protein_coding	519.257	455.067	0.876381	-0.190369	0.0356912	0.318259
ENSRNOG00000027914	10	56453877	56458390	+	Plscr3	protein_coding	126.843	97.6899	0.770163	-0.376764	0.0357498	0.318517
ENSRNOG00000001785	11	82194657	82252139	+	Etv5	protein_coding	1284.69	1437.81	1.11919	0.162452	0.0358666	0.319293
ENSRNOG00000013442	3	11392791	11410180	+	Ciz1	protein_coding	677.134	601.798	0.888743	-0.170161	0.0360492	0.320653
ENSRNOG00000015288	17	63635086	63808464	+	Dip2c	protein_coding	1140.48	1033.3	0.90602	-0.142385	0.03614	0.321195
ENSRNOG00000016737	1	210550668	210739600	-	Tcerg1l	protein_coding	277.969	328.196	1.18069	0.239633	0.0362594	0.32199
ENSRNOG00000017438	1	279207586	279277339	-	Gfra1	protein_coding	209.159	170.175	0.813616	-0.29758	0.0363816	0.322542
ENSRNOG00000060518	14	46523594	46529375	-	LOC257642	protein_coding	85.4876	120.003	1.40375	0.489287	0.0363773	0.322542
ENSRNOG00000002778	10	71744659	71837851	-	Aatf	protein_coding	125.345	159.519	1.27265	0.347833	0.0364652	0.32259
ENSRNOG00000008634	5	128215711	128229737	+	Cc2d1b	protein_coding	357.578	305.255	0.853675	-0.228242	0.036463	0.32259
ENSRNOG00000014844	7	132071116	132143470	-	Kif21a	protein_coding	2735.97	2521.22	0.92151	-0.117928	0.0364772	0.32259
ENSRNOG00000019302	1	199287710	199294979	+	Stx4	protein_coding	325.165	378.665	1.16453	0.219751	0.0365891	0.323314
ENSRNOG00000029134	19	25029037	25069142	+	Adgrl1	protein_coding	5055	4657.06	0.921279	-0.11829	0.0366647	0.323337
ENSRNOG00000014288	9	78900103	78969078	-	Fn1	protein_coding	208.607	250.714	1.20185	0.265258	0.0367444	0.323337
ENSRNOG00000019560	1	166534643	166626158	+	Pde2a	protein_coding	6498.96	6985.81	1.07491	0.104218	0.036669	0.323337
ENSRNOG00000060168	X	45080969	45124270	-	Prkx	protein_coding	103.846	133.201	1.28268	0.359156	0.0367722	0.323337
ENSRNOG00000030443	X	29525256	29547294	+	Rab9a	protein_coding	128.33	161.204	1.25617	0.329028	0.0367479	0.323337
ENSRNOG00000001274	12	39690069	39699113	-	Vps29	protein_coding	638.214	719.668	1.12763	0.173292	0.0367619	0.323337
ENSRNOG00000027355	18	25637588	25665639	+	Wdr36	protein_coding	285.919	337.624	1.18084	0.239815	0.0368042	0.323354
ENSRNOG00000007316	3	122808564	122813583	-	Idh3B	protein_coding	1665.44	1817.68	1.09141	0.126198	0.0368905	0.323601
ENSRNOG00000048487	12	22434814	22451263	+	Slc12a9	protein_coding	163.782	130.519	0.79691	-0.327511	0.0368926	0.323601
ENSRNOG00000008052	5	159512285	159531637	+	Atp13a2	protein_coding	2601.7	2375.56	0.913082	-0.131183	0.0369594	0.323922
ENSRNOG00000000991	12	11252296	11265865	-	Arpc1b	protein_coding	71.6371	99.9702	1.39551	0.48079	0.0371203	0.324212
ENSRNOG00000058186	5	167952728	167966009	+	Errfi1	protein_coding	179.305	217.623	1.2137	0.279415	0.0372017	0.324212
ENSRNOG00000031700	1	15412603	15613746	+	Map3k5	protein_coding	447.485	385.073	0.860526	-0.21671	0.0370983	0.324212
ENSRNOG00000021090	1	221756286	221771143	+	Pygm	protein_coding	556.094	639.12	1.1493	0.200758	0.0371391	0.324212
ENSRNOG00000012053	2	189922996	189928848	+	S100a16	protein_coding	493.244	563.228	1.14189	0.191417	0.0371118	0.324212
ENSRNOG00000006649	15	8890578	9086282	-	Thrb	protein_coding	2099.59	1929.98	0.919217	-0.121523	0.0371858	0.324212
ENSRNOG00000049137	18	15883182	15898821	+	Zfp35	protein_coding	136.006	172.427	1.26779	0.342319	0.0372037	0.324212
ENSRNOG00000032546	7	11786105	11824742	-	Dot1l	protein_coding	345.839	294.816	0.852468	-0.230283	0.0373342	0.324803
ENSRNOG00000046858	X	106487870	106489387	+	MGC109340	protein_coding	179.474	142.378	0.793307	-0.334048	0.0373838	0.324803
ENSRNOG00000046858	X	106487870	106489387	+	MGC109340	protein_coding	179.474	142.378	0.793307	-0.334048	0.0373838	0.324803
ENSRNOG00000008374	14	85113578	85137454	+	Nipsnap1	protein_coding	1250.28	1378.94	1.1029	0.141299	0.0374695	0.324803
ENSRNOG00000006471	7	119429019	119441487	-	Pvalb	protein_coding	403.856	467.509	1.15761	0.211154	0.0374831	0.324803
ENSRNOG00000011391	4	124052300	124080906	-	Rbsn	protein_coding	757.533	674.476	0.890358	-0.167543	0.0373338	0.324803
ENSRNOG00000004624	3	36642587	36660758	-	Rnd3	protein_coding	135.623	169.087	1.24674	0.318161	0.0374103	0.324803
ENSRNOG00000014901	9	42692105	42805673	-	Uggt1	protein_coding	1059.61	956.497	0.902689	-0.147699	0.0374622	0.324803
ENSRNOG00000058412	8	97474092	97494834	-	Morf4l1	protein_coding	2602.47	2825.66	1.08576	0.118703	0.0375731	0.325321
ENSRNOG00000003840	14	66831848	67170361	-	Slit2	protein_coding	715.955	632.463	0.883384	-0.178887	0.0376121	0.325396
ENSRNOG00000020979	2	196043618	196046311	-	Psmb4	protein_coding	1151.26	1268.4	1.10175	0.139796	0.037685	0.325764
ENSRNOG00000001072	12	4439750	4474729	-	Cers4	protein_coding	505.708	442.45	0.874912	-0.19279	0.0379392	0.327172
ENSRNOG00000014791	1	70222964	70237443	+	Peg3	protein_coding	6101.15	5644.24	0.92511	-0.112303	0.0379068	0.327172
ENSRNOG00000061572	7	141355994	141366732	+	Smarcd1	protein_coding	1320.71	1194.83	0.904691	-0.144503	0.037931	0.327172
ENSRNOG00000001128	12	44141422	44174583	-	Tesc	protein_coding	215.078	258.138	1.20021	0.263281	0.0380499	0.327864
ENSRNOG00000018107	1	238843338	238852566	+	Zfand5	protein_coding	1390.16	1264.12	0.909337	-0.137114	0.0381745	0.328411
ENSRNOG00000000501	20	7762327	7786049	+	Zfp523	protein_coding	555.697	629.364	1.13257	0.179596	0.0381672	0.328411
ENSRNOG00000008277	5	57254421	57267002	-	Bag1	protein_coding	226.079	273.349	1.20909	0.273917	0.0384787	0.329998
ENSRNOG00000019934	18	28409955	28415910	+	Paip2	protein_coding	904.783	1006.54	1.11247	0.153765	0.0383972	0.329998
ENSRNOG00000012356	10	40543288	40574444	+	Slc36a1	protein_coding	634.696	558.748	0.880339	-0.183869	0.0384819	0.329998
ENSRNOG00000015140	2	219615420	219628997	-	Trmt13	protein_coding	72.9648	49.9502	0.684579	-0.546711	0.0384707	0.329998
ENSRNOG00000053145	15	61069581	61152506	+	Vwa8	protein_coding	85.9114	61.9048	0.720565	-0.472799	0.0385179	0.330044
ENSRNOG00000006470	13	112075690	112099336	-	Camk1g	protein_coding	465.134	533.417	1.1468	0.197617	0.0386726	0.330578
ENSRNOG00000016484	4	71621729	71626107	+	Gstk1	protein_coding	133.691	168.877	1.26319	0.337067	0.038659	0.330578
ENSRNOG00000020138	9	82741920	82755153	+	Slc4a3	protein_coding	1467.64	1343.53	0.915437	-0.127467	0.0386286	0.330578
ENSRNOG00000005330	10	11595044	11721039	+	Crebbp	protein_coding	611.614	529.226	0.865294	-0.208737	0.0387706	0.330627
ENSRNOG00000004827	6	129609074	129661531	+	Papola	protein_coding	849.934	942.262	1.10863	0.148777	0.0387348	0.330627
ENSRNOG00000048433	3	166743544	166746597	+	Tshz2	protein_coding	271.601	226.342	0.833362	-0.262984	0.0387429	0.330627
ENSRNOG00000005180	14	99529284	99554479	+	Vstm2a	protein_coding	550.81	628.969	1.1419	0.191436	0.0388131	0.330727
ENSRNOG00000006979	5	147294820	147303346	-	Hpca	protein_coding	1156.9	1274.93	1.10203	0.140157	0.03887	0.33095
ENSRNOG00000009412	15	56785162	56970365	-	Lrch1	protein_coding	116.143	87.2106	0.750887	-0.413332	0.0389221	0.33113
ENSRNOG00000020061	9	82674202	82679626	+	Tmem198	protein_coding	359.077	417.181	1.16181	0.21638	0.0389738	0.331308
ENSRNOG00000007324	13	113373578	113571648	+	Plxna2	protein_coding	2267.02	2046.72	0.902827	-0.147479	0.0390682	0.331848
ENSRNOG00000030954	16	50372128	50501921	-	Fat1	protein_coding	971.543	866.306	0.89168	-0.165401	0.0392487	0.332868
ENSRNOG00000042696	5	157546856	157573183	-	Minos1	protein_coding	366.348	423.537	1.15611	0.209274	0.0392503	0.332868
ENSRNOG00000042696	5	157546856	157573183	-	Minos1	protein_coding	366.348	423.537	1.15611	0.209274	0.0392503	0.332868
ENSRNOG00000032660	2	258792839	258997145	-	Adgrl2	protein_coding	802.86	705.569	0.878819	-0.186363	0.0395239	0.333952
ENSRNOG00000043150	3	176475893	176489925	+	Arfgap1	protein_coding	829.851	743.801	0.896307	-0.157935	0.0394761	0.333952
ENSRNOG00000008709	8	33239139	33392305	+	Arhgap32	protein_coding	7519.43	6968.54	0.926738	-0.109766	0.0395334	0.333952
ENSRNOG00000058609	2	220481616	220535751	-	Palmd	protein_coding	140.101	175.867	1.25529	0.328018	0.0394548	0.333952
ENSRNOG00000009605	X	15575934	15587419	-	Tfe3	protein_coding	171.05	137.64	0.804677	-0.313518	0.0394506	0.333952
ENSRNOG00000021110	2	196392938	196402106	-	Mllt11	protein_coding	2604.53	2371.6	0.910568	-0.135161	0.0396661	0.334284
ENSRNOG00000011329	8	64481172	64502722	+	Pkm	protein_coding	11912.6	12786.9	1.0734	0.102182	0.0396273	0.334284
ENSRNOG00000011329	8	64481172	64502722	+	Pkm	protein_coding	11912.6	12786.9	1.0734	0.102182	0.0396273	0.334284
ENSRNOG00000002763	10	48050803	48129377	-	Ulk2	protein_coding	1263.11	1141.74	0.90391	-0.145749	0.0396411	0.334284
ENSRNOG00000020674	10	89352835	89356547	+	Rpl27	protein_coding	812.965	917.133	1.12813	0.173938	0.0397436	0.334675
ENSRNOG00000005861	13	111926442	111972603	-	Hsd11b1	protein_coding	214.387	256.774	1.19771	0.260282	0.0397755	0.334681
ENSRNOG00000019727	16	8202048	8207464	-	Dph3	protein_coding	159.021	196.388	1.23498	0.304493	0.0399236	0.335665
ENSRNOG00000048174	10	38779132	38782419	-	Uqcrq	protein_coding	684.643	771.03	1.12618	0.171435	0.0399708	0.335798
ENSRNOG00000004629	6	86810809	86822094	-	Fkbp3	protein_coding	1188.42	1303.84	1.09712	0.133718	0.0400207	0.335861
ENSRNOG00000020828	8	22189600	22233748	+	Pde4a	protein_coding	587.916	517.504	0.880234	-0.184041	0.0400407	0.335861
ENSRNOG00000003878	13	46169963	46930858	+	Thsd7b	protein_coding	149.78	119.248	0.79615	-0.328888	0.0405638	0.339983
ENSRNOG00000010008	16	716683	755990	-	Polr3a	protein_coding	674.178	596.136	0.884242	-0.177487	0.0407292	0.341103
ENSRNOG00000013892	7	120891940	120897687	+	Cby1	protein_coding	149.151	183.832	1.23253	0.301618	0.0408642	0.341968
ENSRNOG00000014035	9	41295909	41302501	+	Arhgef4	protein_coding	1532.72	1675.64	1.09325	0.128619	0.0409629	0.342344
ENSRNOG00000009884	7	120153184	120156289	+	Lgals1	protein_coding	56.6313	78.3202	1.38298	0.467785	0.0409729	0.342344
ENSRNOG00000021157	2	197655786	197679458	+	Ctss	protein_coding	910.881	1042.02	1.14397	0.194051	0.0412622	0.343958
ENSRNOG00000012149	2	211480400	211527919	-	Gpsm2	protein_coding	84.4921	110.602	1.30902	0.388487	0.04126	0.343958
ENSRNOG00000004672	14	84335597	84355528	-	Sec14l2	protein_coding	861.652	956.11	1.10962	0.150071	0.0412254	0.343958
ENSRNOG00000045775	9	100080144	100089834	+	Rnpepl1	protein_coding	216.143	178.542	0.826038	-0.275721	0.0413208	0.34418
ENSRNOG00000012500	8	57667472	57830504	-	Ddx10	protein_coding	245.993	293.546	1.19331	0.254969	0.0415269	0.344891
ENSRNOG00000020264	15	34424016	34431325	-	Dhrs1	protein_coding	169.337	133.603	0.788973	-0.341953	0.0415709	0.344891
ENSRNOG00000009184	4	131366744	131694755	-	Foxp1	protein_coding	425.113	367.456	0.864372	-0.210275	0.0415882	0.344891
ENSRNOG00000061270	10	62656000	62664466	-	Git1	protein_coding	6112.02	6543.73	1.07063	0.0984659	0.0414496	0.344891
ENSRNOG00000024743	7	122896871	122918036	+	L3mbtl2	protein_coding	506.076	431.247	0.852139	-0.230839	0.0415987	0.344891
ENSRNOG00000002238	11	68306659	68349238	-	Sema5b	protein_coding	185.04	147.394	0.796555	-0.328155	0.041561	0.344891
ENSRNOG00000031387	7	12290402	12311149	-	Dazap1	protein_coding	351.295	299.087	0.851386	-0.232114	0.0417455	0.345518
ENSRNOG00000005981	4	87237949	87281157	-	Nt5c3a	protein_coding	491.691	560.584	1.14012	0.18918	0.0417593	0.345518
ENSRNOG00000025691	9	19935768	19978013	-	Pla2g7	protein_coding	202.47	246.232	1.21614	0.282309	0.0417709	0.345518
ENSRNOG00000002795	10	102167771	102180569	+	Cog1	protein_coding	563.538	492.518	0.873975	-0.194336	0.0418154	0.34562
ENSRNOG00000015320	7	144264199	144272578	-	Atp5g2	protein_coding	1079.52	1192.81	1.10494	0.14397	0.0419218	0.346074
ENSRNOG00000008195	7	75574967	75597276	-	Ywhaz	protein_coding	12389	13115.3	1.05862	0.082191	0.0419347	0.346074
ENSRNOG00000011313	1	269973351	270472866	-	Sorcs1	protein_coding	782.862	695.238	0.888073	-0.17125	0.0419752	0.346143
ENSRNOG00000003661	10	104057697	104075777	-	Hn1	protein_coding	871.929	966.005	1.10789	0.147821	0.0420435	0.346268
ENSRNOG00000001682	11	34598492	34738791	+	Ttc3	protein_coding	10449	11185.5	1.07048	0.0982541	0.0420548	0.346268
ENSRNOG00000028892	12	2579887	2585233	+	Prr36	protein_coding	598.019	529.01	0.884603	-0.176897	0.0421121	0.346474
ENSRNOG00000002305	11	66932614	66961713	+	Slc15a2	protein_coding	517.618	591.393	1.14253	0.192227	0.0422077	0.346995
ENSRNOG00000018075	16	7080454	7082193	-	Spcs1	protein_coding	436.024	502.281	1.15196	0.204087	0.0422516	0.34709
ENSRNOG00000005107	10	104443736	104482838	-	Recql5	protein_coding	250.457	208.971	0.834361	-0.261257	0.0423095	0.3473
ENSRNOG00000011094	7	124758378	124929025	-	Efcab6	protein_coding	129.375	98.7312	0.763143	-0.389975	0.0424579	0.347792
ENSRNOG00000008951	14	85311089	85314270	+	Rasl10a	protein_coding	704.68	791.183	1.12276	0.167044	0.0424666	0.347792
ENSRNOG00000043069	11	68633160	68686548	+	Sec22a	protein_coding	136.377	170.991	1.25381	0.326314	0.0424137	0.347792
ENSRNOG00000029194	8	118160299	118187791	-	Dhx30	protein_coding	1286.54	1172.42	0.911298	-0.134006	0.04268	0.348072
ENSRNOG00000005159	7	112673465	112833083	-	Fam135b	protein_coding	360.308	305.29	0.847304	-0.239049	0.0426356	0.348072
ENSRNOG00000015236	10	59000397	59010903	+	Mybbp1a	protein_coding	705.168	627.264	0.889524	-0.168895	0.0426952	0.348072
ENSRNOG00000010479	15	93678885	93868301	-	Mycbp2	protein_coding	3819.22	3536.88	0.926074	-0.110801	0.0426772	0.348072
ENSRNOG00000013987	7	12471824	12518654	+	Sbno2	protein_coding	205.662	168.87	0.821104	-0.284363	0.0426654	0.348072
ENSRNOG00000019670	2	202447745	202470399	-	Wdr3	protein_coding	270.932	227.826	0.840899	-0.249995	0.0425991	0.348072
ENSRNOG00000019326	19	43971474	44078336	-	Cfdp1	protein_coding	627.536	706.281	1.12548	0.170544	0.0427436	0.348087
ENSRNOG00000018804	17	42324594	42422053	-	Fam65b	protein_coding	864.105	777.497	0.899771	-0.15237	0.0427941	0.348087
ENSRNOG00000010812	3	63353178	63454967	+	Osbpl6	protein_coding	940.365	837.55	0.890665	-0.167045	0.0427648	0.348087
ENSRNOG00000024879	7	12840938	12851153	+	Polrmt	protein_coding	256.415	214.849	0.837896	-0.255157	0.0428718	0.348455
ENSRNOG00000025040	5	76182121	76189013	+	Gng10	protein_coding	487.547	552.552	1.13333	0.180568	0.0429204	0.348586
ENSRNOG00000016727	5	135482068	135498822	-	Akr1a1	protein_coding	4691.07	5055.9	1.07777	0.10805	0.043091	0.349378
ENSRNOG00000027690	13	100129761	100162461	+	Eif3e	protein_coding	555.912	628.67	1.13088	0.177446	0.0431508	0.349378
ENSRNOG00000004783	3	71210301	71262615	+	Fam171b	protein_coding	2410.12	2620.82	1.08742	0.120913	0.0431999	0.349378
ENSRNOG00000009236	4	155709613	155724790	+	Necap1	protein_coding	2195.49	2365.59	1.07748	0.107656	0.043213	0.349378
ENSRNOG00000019459	7	11752412	11754508	-	Oaz1	protein_coding	2675.77	2901.61	1.0844	0.116903	0.0431819	0.349378
ENSRNOG00000005424	6	42852683	42859927	+	Odc1	protein_coding	671.196	751.254	1.11928	0.162567	0.043213	0.349378
ENSRNOG00000006965	10	38692211	38773021	+	Aff4	protein_coding	2307.86	2499.02	1.08283	0.11481	0.0432954	0.349782
ENSRNOG00000031802	1	141218095	141218277	+	LOC100360056	protein_coding	288.458	336.48	1.16648	0.22216	0.0434205	0.350087
ENSRNOG00000038883	20	7331326	7397448	-	LOC294154	protein_coding	2547.94	2759.26	1.08294	0.114947	0.0434237	0.350087
ENSRNOG00000009473	10	84986328	85004562	+	Osbpl7	protein_coding	234.225	194.557	0.830641	-0.267704	0.043431	0.350087
ENSRNOG00000010711	6	128388053	128434183	-	Dicer1	protein_coding	612.63	536.825	0.876262	-0.190566	0.0434686	0.350128
ENSRNOG00000000891	NA	NA	NA	NA	NA	NA	171.751	136.354	0.7939	-0.33297	0.0435118	0.350213
ENSRNOG00000020460	1	220744195	220746224	-	Banf1	protein_coding	414.581	475.657	1.14732	0.198267	0.0437092	0.351538
ENSRNOG00000007628	7	114997103	115002902	+	Ptp4a3	protein_coding	392.587	339.475	0.864713	-0.209706	0.043757	0.35166
ENSRNOG00000011076	2	231226949	231648122	-	Ank2	protein_coding	14246.4	13215.9	0.927669	-0.108319	0.0438494	0.351876
ENSRNOG00000004581	X	135005123	135041027	-	Zdhhc9	protein_coding	776.877	678.414	0.873259	-0.195519	0.0438348	0.351876
ENSRNOG00000012940	17	48648879	48810991	-	Vps41	protein_coding	2196.81	2393.84	1.08969	0.123915	0.0439568	0.352475
ENSRNOG00000013770	1	150323768	150395415	-	Folh1	protein_coding	90.1315	117.229	1.30065	0.379228	0.0440563	0.352876
ENSRNOG00000015822	1	124772596	124803363	-	Klf13	protein_coding	128.614	100.722	0.78313	-0.352676	0.0440742	0.352876
ENSRNOG00000003453	13	42219887	42263024	-	Lypd1	protein_coding	611.939	537.273	0.877985	-0.187732	0.0441054	0.352876
ENSRNOG00000045967	6	62796951	62798384	-	AABR07064061.1	processed_pseudogene	121.799	152.526	1.25228	0.324558	0.0442658	0.353217
ENSRNOG00000019052	9	82393672	82400530	+	Ankzf1	protein_coding	353.36	299.802	0.848431	-0.23713	0.0445158	0.353217
ENSRNOG00000007235	10	83895947	83898527	-	Atp5g1	protein_coding	961.878	1076.58	1.11925	0.162527	0.0443684	0.353217
ENSRNOG00000010706	14	85763397	85772762	-	Ccdc117	protein_coding	106.69	137.324	1.28713	0.364162	0.0443907	0.353217
ENSRNOG00000020769	10	16694792	16752205	-	Crebrf	protein_coding	614.859	697.347	1.13416	0.181622	0.0445743	0.353217
ENSRNOG00000012663	9	53626592	53710817	+	Mfsd6	protein_coding	1670.4	1526.17	0.913655	-0.130278	0.0444304	0.353217
ENSRNOG00000014142	9	29634179	29647903	-	Ogfrl1	protein_coding	386.396	446.474	1.15548	0.208495	0.0445753	0.353217
ENSRNOG00000006228	4	77470636	77489535	-	Pdia4	protein_coding	331.903	384.186	1.15752	0.211041	0.0444395	0.353217
ENSRNOG00000001517	3	58530870	58558027	+	Pdk1	protein_coding	334.203	388.993	1.16394	0.219018	0.0445685	0.353217
ENSRNOG00000018653	18	29233987	29290447	-	Pfdn1	protein_coding	604.107	683.09	1.13074	0.177273	0.0443173	0.353217
ENSRNOG00000027098	1	198383201	198403544	+	Sez6l2	protein_coding	4276.95	3940.92	0.921431	-0.118051	0.0442684	0.353217
ENSRNOG00000005049	3	47677720	47685902	+	Tbr1	protein_coding	862.941	749.561	0.868612	-0.203217	0.0444714	0.353217
ENSRNOG00000015229	1	78354934	78390907	+	Zc3h4	protein_coding	693.561	616.015	0.888192	-0.171057	0.0442331	0.353217
ENSRNOG00000007769	7	18559205	18585313	-	March2	protein_coding	603.952	686.463	1.13662	0.184749	0.044822	0.353217
ENSRNOG00000007100	4	56674832	56704549	+	Ccdc136	protein_coding	764.187	685.21	0.896652	-0.15738	0.0448712	0.353217
ENSRNOG00000058916	7	140383397	140397179	+	Ccdc65	protein_coding	258.582	306.732	1.18621	0.246355	0.0448533	0.353217
ENSRNOG00000015430	10	56431573	56444847	-	Nlgn2	protein_coding	2458.76	2245.9	0.913429	-0.130635	0.0446432	0.353217
ENSRNOG00000018000	19	37734599	37796089	-	Ranbp10	protein_coding	624.085	551.96	0.884432	-0.177177	0.0448567	0.353217
ENSRNOG00000020102	1	86948918	86971952	+	Sirt2	protein_coding	1595.12	1421.19	0.890963	-0.166563	0.0446937	0.353217
ENSRNOG00000014285	10	62705051	62814520	-	Ssh2	protein_coding	445.461	385.23	0.864789	-0.209581	0.0447189	0.353217
ENSRNOG00000013217	2	54897424	54939514	+	Ttc33	protein_coding	407.954	466.93	1.14457	0.194799	0.0446619	0.353217
ENSRNOG00000014903	1	261415191	261438539	+	Zfyve27	protein_coding	1212.39	1102.17	0.90909	-0.137506	0.0447514	0.353217
ENSRNOG00000001430	12	23587222	23592774	-	Polr2j	protein_coding	157.386	192.916	1.22575	0.293663	0.0449447	0.353342
ENSRNOG00000019587	9	82446633	82461903	-	Ptprn	protein_coding	6324.99	5829.94	0.921731	-0.117582	0.0449857	0.353342
ENSRNOG00000014617	4	100475416	100483168	-	Tgoln2	protein_coding	1640.58	1778.96	1.08435	0.116826	0.0449677	0.353342
ENSRNOG00000001047	12	2548218	2555164	-	Map2k7	protein_coding	318.957	271.482	0.851156	-0.232505	0.0450505	0.353592
ENSRNOG00000004208	6	788548	960703	+	Crim1	protein_coding	1529.64	1404.08	0.917913	-0.123571	0.045151	0.353777
ENSRNOG00000020941	1	89016096	89017290	-	Psenen	protein_coding	404.204	467.271	1.15603	0.209176	0.0452044	0.353777
ENSRNOG00000038228	15	58687786	58711872	-	Serp2	protein_coding	671.925	752.409	1.11978	0.163217	0.0452058	0.353777
ENSRNOG00000019544	1	40914171	40921508	-	Zbtb2	protein_coding	72.6788	97.2969	1.33872	0.420859	0.045134	0.353777
ENSRNOG00000018809	3	13916203	13933658	-	Psmd5	protein_coding	298.112	347.674	1.16625	0.22188	0.0453987	0.355028
ENSRNOG00000024549	7	12331416	12346475	-	Mum1	protein_coding	376.477	325.823	0.865452	-0.208474	0.0455773	0.356166
ENSRNOG00000009409	5	164972480	164977916	+	Fbxo2	protein_coding	469.772	540.558	1.15068	0.202489	0.045709	0.35664
ENSRNOG00000016071	4	157359332	157372861	-	P3h3	protein_coding	258.508	207.022	0.800835	-0.320423	0.0457248	0.35664
ENSRNOG00000001516	3	58632476	58924038	+	Rapgef4	protein_coding	2564.4	2785.37	1.08617	0.119247	0.0457375	0.35664
ENSRNOG00000012640	3	2569135	2573387	-	Dpp7	protein_coding	408.284	352.264	0.862792	-0.212915	0.0458838	0.357029
ENSRNOG00000007030	5	43603043	43757549	+	Epha7	protein_coding	492.027	557.405	1.13288	0.17999	0.0458703	0.357029
ENSRNOG00000021184	1	222525990	222590220	-	Mark2	protein_coding	1327.56	1206.24	0.908609	-0.138269	0.0458872	0.357029
ENSRNOG00000017575	19	54151048	54163608	-	Gins2	protein_coding	202.898	245.324	1.2091	0.273932	0.0460541	0.357203
ENSRNOG00000004437	10	98706960	98823287	+	Map2k6	protein_coding	230.144	273.005	1.18623	0.246385	0.0460767	0.357203
ENSRNOG00000008788	6	101923785	102028592	+	Mpp5	protein_coding	510.64	580.606	1.13702	0.185252	0.0460132	0.357203
ENSRNOG00000010358	16	32062336	32227491	-	Sh3rf1	protein_coding	877.695	785.452	0.894904	-0.160196	0.0460175	0.357203
ENSRNOG00000024482	12	13810180	13910955	+	Tnrc18	protein_coding	927.654	827.333	0.891855	-0.165119	0.0460579	0.357203
ENSRNOG00000015644	5	76386836	76419560	+	Ugcg	protein_coding	1128.75	1023.74	0.906967	-0.140878	0.0461089	0.357203
ENSRNOG00000012369	1	135083974	135162685	+	Fam174b	protein_coding	71.2096	94.6088	1.3286	0.409902	0.0462853	0.358053
ENSRNOG00000007304	4	89078711	89169146	+	Herc3	protein_coding	2621.61	2424.86	0.924951	-0.112551	0.046263	0.358053
ENSRNOG00000053502	1	165911718	165967069	-	Arhgef17	protein_coding	1462.11	1337.69	0.914898	-0.128317	0.0463812	0.358397
ENSRNOG00000031824	8	22368745	22385864	+	Slc44a2	protein_coding	439.247	384.001	0.874225	-0.193923	0.0463965	0.358397
ENSRNOG00000014201	8	115623178	115626380	-	Manf	protein_coding	258.275	303.658	1.17572	0.23354	0.0464317	0.358411
ENSRNOG00000019340	3	151508361	151544674	+	Cep250	protein_coding	241.009	201.954	0.837953	-0.255059	0.0465427	0.35901
ENSRNOG00000019915	1	81413353	81441678	+	Xrcc1	protein_coding	497.027	437.328	0.879889	-0.184607	0.0466286	0.359415
ENSRNOG00000021017	1	101682172	101687293	+	Car11	protein_coding	1173.02	1071.23	0.913224	-0.130959	0.046813	0.359804
ENSRNOG00000048812	8	117117430	117118522	+	Gpx1	protein_coding	208.211	248.905	1.19545	0.25755	0.0467522	0.359804
ENSRNOG00000037402	9	99813332	99818262	-	Myeov2	protein_coding	536.139	604.972	1.12839	0.174261	0.0467414	0.359804
ENSRNOG00000002575	10	43224269	43231611	+	Sap30l	protein_coding	111.43	140.201	1.25819	0.331355	0.0467807	0.359804
ENSRNOG00000014605	16	85331866	85337769	+	Lig4	protein_coding	150.067	184.096	1.22676	0.294854	0.0468737	0.360013
ENSRNOG00000019065	3	64269817	64543100	-	Zfp385b	protein_coding	307.216	258.777	0.842331	-0.247541	0.0470334	0.360981
ENSRNOG00000009899	2	115866701	115891097	-	Skil	protein_coding	396.238	455.606	1.14983	0.201421	0.0471107	0.361317
ENSRNOG00000013920	18	31812109	32207801	-	Arhgap26	protein_coding	570.967	506.396	0.886908	-0.173144	0.0473153	0.361568
ENSRNOG00000014317	3	23301455	23309072	+	Arpc5l	protein_coding	423.625	483.089	1.14037	0.189503	0.0473021	0.361568
ENSRNOG00000001597	3	60721135	60795951	-	Atf2	protein_coding	1137.21	1248.37	1.09774	0.134542	0.0472115	0.361568
ENSRNOG00000010890	15	52166401	52210746	-	Bmp1	protein_coding	413.704	360.513	0.871428	-0.198546	0.047528	0.361568
ENSRNOG00000038951	11	64962666	64968437	-	Cox17	protein_coding	288.496	338.752	1.1742	0.231674	0.047481	0.361568
ENSRNOG00000005478	4	87167514	87234197	+	Fkbp9	protein_coding	318.691	373.675	1.17253	0.229626	0.0477329	0.361568
ENSRNOG00000017311	1	153861569	154056654	+	Me3	protein_coding	816.768	906.178	1.10947	0.14987	0.0474073	0.361568
ENSRNOG00000019394	16	20432899	20435974	+	Mpv17l2	protein_coding	122.892	153.301	1.24745	0.318981	0.0476347	0.361568
ENSRNOG00000008945	5	62109328	62126494	+	Nans	protein_coding	351.173	404.596	1.15213	0.2043	0.0475218	0.361568
ENSRNOG00000010616	3	2466544	2474913	-	Ndor1	protein_coding	289.877	244.538	0.843591	-0.245384	0.0473772	0.361568
ENSRNOG00000002461	17	90553394	90627101	-	Nid1	protein_coding	98.407	74.3162	0.755192	-0.405085	0.0477491	0.361568
ENSRNOG00000029871	6	104891376	105097054	-	Slc8a3	protein_coding	271.984	227.968	0.838165	-0.254694	0.0472576	0.361568
ENSRNOG00000003822	10	29029590	29044583	+	Slu7	protein_coding	517.356	583.688	1.12821	0.174042	0.0474487	0.361568
ENSRNOG00000020457	1	201055644	201329622	+	Tacc2	protein_coding	898.199	811.976	0.904005	-0.145597	0.0475276	0.361568
ENSRNOG00000016224	19	52408917	52424318	-	Tldc1	protein_coding	91.0263	68.3585	0.750976	-0.413162	0.0476787	0.361568
ENSRNOG00000021230	3	123130249	123171875	-	Ubox5	protein_coding	232.894	193.821	0.832229	-0.264948	0.0477296	0.361568
ENSRNOG00000003706	13	89661763	89668473	-	Ufc1	protein_coding	530.162	602.758	1.13693	0.185146	0.0477465	0.361568
ENSRNOG00000002713	10	43752700	43760930	-	Zfp672	protein_coding	178.355	215.633	1.20901	0.273827	0.0476266	0.361568
ENSRNOG00000001377	12	41470557	41485122	-	Ddx54	protein_coding	355.857	304.301	0.855122	-0.225798	0.0479183	0.361857
ENSRNOG00000005151	6	7900972	7933796	+	Dync2li1	protein_coding	159.852	195.761	1.22464	0.292358	0.0478593	0.361857
ENSRNOG00000026212	7	120345180	120375156	+	Micall1	protein_coding	271.332	227.965	0.840169	-0.251249	0.0478434	0.361857
ENSRNOG00000048958	17	87020089	87020382	+	Rpl37-ps1	protein_coding	68.1776	92.1797	1.35205	0.43515	0.0479221	0.361857
ENSRNOG00000012775	1	31539215	31545559	-	Ccdc127	protein_coding	172.228	208.265	1.20924	0.274099	0.0479824	0.362058
ENSRNOG00000018937	2	210720704	210782856	-	Gstm2	protein_coding	1565.06	1706.68	1.09049	0.124971	0.0481824	0.362803
ENSRNOG00000018937	2	210720704	210782856	-	Gstm2	protein_coding	1565.06	1706.68	1.09049	0.124971	0.0481824	0.362803
ENSRNOG00000012564	X	123460280	123486814	-	RGD1564541	protein_coding	140.266	173.236	1.23505	0.304575	0.0481765	0.362803
ENSRNOG00000011625	16	60925093	61067192	+	Tnks	protein_coding	846.036	763.392	0.902317	-0.148294	0.0481699	0.362803
ENSRNOG00000048495	1	261106760	261140389	-	Rrp12	protein_coding	328.982	281.357	0.855237	-0.225604	0.0483052	0.363473
ENSRNOG00000017780	5	157759416	157768471	+	Akr7a2	protein_coding	170.707	205.939	1.20639	0.270692	0.0485155	0.364545
ENSRNOG00000021507	1	113419725	113527735	+	Luzp2	processed_transcript	322.205	373.986	1.16071	0.215002	0.0485055	0.364545
ENSRNOG00000007733	X	64248278	64428592	-	Arhgef9	processed_transcript	4285.05	4617.07	1.07748	0.107666	0.0486512	0.365054
ENSRNOG00000001448	12	24180937	24315373	+	Hip1	protein_coding	530.077	467.512	0.881969	-0.1812	0.048631	0.365054
ENSRNOG00000004220	7	83564563	83582508	+	Ebag9	protein_coding	202.775	242.008	1.19348	0.255174	0.0486861	0.36506
ENSRNOG00000020393	1	167335248	167347671	-	Rhog	protein_coding	251.72	206.722	0.821238	-0.284129	0.04884	0.365578
ENSRNOG00000060597	5	153269526	153277563	+	Syf2	protein_coding	448.927	510.431	1.137	0.185234	0.0488392	0.365578
ENSRNOG00000014501	4	115601661	115690272	+	Zfp638	protein_coding	1009.07	1120.38	1.11031	0.150959	0.0488571	0.365578
ENSRNOG00000001259	12	40018937	40219291	+	Cux2	protein_coding	984.464	1124.3	1.14204	0.191612	0.0489126	0.365738
ENSRNOG00000012550	5	134919044	134927235	-	Uqcrh	protein_coding	1063.3	1178.23	1.10809	0.148071	0.049053	0.366533
ENSRNOG00000024309	1	89075975	89084859	-	Cox6b1	protein_coding	1483.42	1642.93	1.10753	0.147343	0.0491149	0.366741
ENSRNOG00000007356	4	99449111	99494423	+	Chmp3	protein_coding	756.778	841.738	1.11226	0.1535	0.0491599	0.366822
ENSRNOG00000042717	2	197987705	197991574	-	Ciart	protein_coding	150.371	186.418	1.23972	0.310016	0.0492561	0.367029
ENSRNOG00000012204	5	144779681	144872271	+	LOC100294508	protein_coding	917.103	825.921	0.900576	-0.15108	0.0492525	0.367029
ENSRNOG00000055023	1	226258417	226258557	+	Tmem258	protein_coding	74.2142	98.1704	1.3228	0.403594	0.0493007	0.367108
ENSRNOG00000008566	5	14609674	14620965	+	Mrpl15	protein_coding	382.838	438.614	1.14569	0.196218	0.0494257	0.367758
ENSRNOG00000001548	3	62497571	62524996	-	Nfe2l2	protein_coding	123.137	153.199	1.24414	0.315143	0.0494566	0.367758
ENSRNOG00000019485	1	199351628	199356881	+	Bckdk	protein_coding	449.891	390.611	0.868236	-0.203841	0.0495242	0.368006
ENSRNOG00000011586	2	157747542	157759838	-	Ccnl1	protein_coding	240.45	283.344	1.17839	0.236822	0.049976	0.370595
ENSRNOG00000011586	2	157747542	157759838	-	Ccnl1	protein_coding	240.45	283.344	1.17839	0.236822	0.049976	0.370595
ENSRNOG00000017136	1	188034495	188101566	-	Syt17	protein_coding	1479.26	1613.02	1.09043	0.124894	0.0499735	0.370595
ENSRNOG00000019277	16	74292438	74308903	+	Vdac3	protein_coding	1960.97	2114.92	1.0785	0.10903	0.0499151	0.370595
ENSRNOG00000022274	3	12020229	12029877	-	Slc2a8	protein_coding	456.551	399.529	0.875102	-0.192477	0.0500179	0.37065
ENSRNOG00000034177	9	110057155	110225486	-	Efna5	protein_coding	92.9358	69.473	0.747537	-0.419782	0.0501947	0.371447
ENSRNOG00000007125	14	106153575	106207658	+	Vps54	protein_coding	383.528	331.86	0.865283	-0.208757	0.0501658	0.371447
ENSRNOG00000009892	8	31977001	32000378	-	Adamts15	protein_coding	134.971	107.35	0.79535	-0.330338	0.0503915	0.372313
ENSRNOG00000017512	1	219145459	219186860	-	Aldh3b1	protein_coding	384.019	440.373	1.14675	0.197547	0.0504274	0.372313
ENSRNOG00000021025	1	221597296	221605400	-	LOC100909468	protein_coding	1844.02	1679.49	0.910774	-0.134836	0.0505213	0.372313
ENSRNOG00000009837	2	182897830	183031214	-	LOC679811	protein_coding	202.467	167.408	0.826844	-0.274313	0.0503544	0.372313
ENSRNOG00000013515	5	149922352	149996334	-	Ptpru	protein_coding	512.35	446.114	0.870722	-0.199716	0.0505541	0.372313
ENSRNOG00000005960	8	43315592	43336304	-	RGD1311744	protein_coding	388.389	338.101	0.870522	-0.200048	0.0504609	0.372313
ENSRNOG00000011977	2	85377318	85808970	+	Sema5a	protein_coding	1326.3	1210.69	0.912835	-0.131574	0.0504897	0.372313
ENSRNOG00000019549	1	40816107	40906581	+	Akap12	protein_coding	489.57	429.221	0.876732	-0.189793	0.0506693	0.37265
ENSRNOG00000000775	20	2004052	2014286	+	Mog	protein_coding	560.779	402.542	0.717827	-0.478292	0.0506501	0.37265
ENSRNOG00000053239	8	44847157	44975457	+	Clmp	protein_coding	200.143	163.878	0.818803	-0.288411	0.0507542	0.372764
ENSRNOG00000052539	7	140967282	140981583	+	Prpf40b	protein_coding	661.78	590.612	0.892461	-0.164139	0.0507251	0.372764
ENSRNOG00000011517	9	20546159	20621051	-	Tnfrsf21	protein_coding	743.674	667.679	0.897811	-0.155516	0.0508417	0.372897
ENSRNOG00000009956	4	152452848	152578446	-	Wnk1	protein_coding	1374.44	1250.02	0.909476	-0.136893	0.0508414	0.372897
ENSRNOG00000002852	10	72197977	72227462	+	Myo19	protein_coding	136.484	107.894	0.790525	-0.339117	0.0510625	0.374261
ENSRNOG00000054344	19	25774143	25775659	-	AC120246.2	pseudogene	49.5905	70.5239	1.42212	0.508048	0.0511335	0.374505
ENSRNOG00000019908	2	187911530	187914905	-	Lamtor2	protein_coding	491.794	555.276	1.12908	0.175151	0.0511946	0.374505
ENSRNOG00000016930	1	72580424	72584482	+	Ube2s	protein_coding	630.636	719.558	1.141	0.190302	0.0512004	0.374505
ENSRNOG00000019534	1	214534284	214606169	+	Ap2a2	protein_coding	4947.79	4559.17	0.921455	-0.118014	0.0514084	0.375515
ENSRNOG00000060538	2	196402837	196410659	+	Cdc42se1	protein_coding	481.827	547.144	1.13556	0.183405	0.0513927	0.375515
ENSRNOG00000029826	8	50070579	50126413	-	Cep164	protein_coding	176.282	144.36	0.818918	-0.288209	0.0514607	0.375642
ENSRNOG00000028505	20	5441876	5445553	+	Rps18	protein_coding	1099.5	1217.97	1.10775	0.14763	0.0514973	0.375654
ENSRNOG00000005776	6	131834097	131926272	-	Bcl11b	protein_coding	519.279	450.891	0.868302	-0.203731	0.0515651	0.37573
ENSRNOG00000027514	1	65537640	65541177	+	Ube2m	protein_coding	1762.13	1922.69	1.09112	0.125807	0.0515776	0.37573
ENSRNOG00000017241	1	265298868	265317860	+	Dpcd	protein_coding	775.549	860.714	1.10981	0.150316	0.0516725	0.376166
ENSRNOG00000018295	15	51818897	51834030	-	Ccar2	protein_coding	1412.61	1293.54	0.915711	-0.127035	0.0517772	0.376673
ENSRNOG00000017265	9	43358588	43454078	-	Tmem131	protein_coding	992.14	896.634	0.903737	-0.146025	0.0518914	0.377248
ENSRNOG00000004067	6	64789940	64864996	+	Nrcam	protein_coding	8023.9	7521.81	0.937426	-0.0932229	0.0519764	0.37748
ENSRNOG00000021891	11	86903122	86915715	+	Zdhhc8	protein_coding	938.086	850.642	0.906784	-0.141169	0.0519936	0.37748
ENSRNOG00000024501	5	78428669	78567288	+	Rgs3	protein_coding	181.188	147.948	0.816543	-0.292399	0.0520672	0.377504
ENSRNOG00000013356	2	189878168	189880743	-	Snapin	protein_coding	542.332	613.209	1.13069	0.177202	0.0520563	0.377504
ENSRNOG00000051204	11	33925498	34027435	+	Dopey2	protein_coding	966.744	873.379	0.903423	-0.146526	0.0521051	0.377525
ENSRNOG00000004284	7	37812831	37815088	+	Btg1	protein_coding	206.464	246.879	1.19575	0.257912	0.0522272	0.378155
ENSRNOG00000056703	X	76820329	76979115	-	Atrx	protein_coding	1707.99	1865.97	1.09249	0.127622	0.0524085	0.378977
ENSRNOG00000008414	7	12875537	12882753	-	Bsg	protein_coding	4593.76	4950.47	1.07765	0.10789	0.0524114	0.378977
ENSRNOG00000033741	2	198721724	198725154	+	Ankrd34a	protein_coding	860.217	777.968	0.904386	-0.14499	0.0525067	0.379198
ENSRNOG00000010133	4	61912210	61940696	+	Bpgm	protein_coding	983.786	1086.2	1.1041	0.142873	0.0525125	0.379198
ENSRNOG00000019869	1	85291462	85300825	-	Lrfn1	protein_coding	616.83	544.535	0.882796	-0.179847	0.0525719	0.379248
ENSRNOG00000017579	17	19682040	19703681	-	Mylip	protein_coding	205.119	169.395	0.825836	-0.276073	0.05259	0.379248
ENSRNOG00000017489	19	54060622	54148970	+	Gse1	protein_coding	283.845	342.336	1.20607	0.270313	0.0527885	0.380033
ENSRNOG00000054314	3	165020230	165039707	-	Kcng1	protein_coding	647.792	563.635	0.870087	-0.200768	0.0527842	0.380033
ENSRNOG00000029778	X	6430594	6533534	+	Maob	protein_coding	561.023	636.325	1.13422	0.181703	0.0528049	0.380033
ENSRNOG00000001592	11	27130172	27141881	-	Cct8	protein_coding	1826.9	1980.6	1.08413	0.116534	0.0528451	0.380067
ENSRNOG00000009019	4	123642210	123713464	-	Slc6a6	protein_coding	426.388	366.312	0.859105	-0.219094	0.0529702	0.380712
ENSRNOG00000056207	4	44936290	44972267	+	Capza2	protein_coding	1916.88	2073.65	1.08178	0.113409	0.0530297	0.380824
ENSRNOG00000017021	1	176296193	176607466	-	Galnt18	protein_coding	293.249	247.054	0.842472	-0.247299	0.0530748	0.380824
ENSRNOG00000011394	6	27768943	27815611	+	Kif3c	protein_coding	2691.27	2477.26	0.920479	-0.119544	0.053092	0.380824
ENSRNOG00000002126	11	20471764	20705063	+	Ncam2	protein_coding	1467.29	1350.02	0.920078	-0.120173	0.0535778	0.38354
ENSRNOG00000011709	5	148781222	148911803	+	Pum1	protein_coding	985.447	887.923	0.901035	-0.150344	0.0535511	0.38354
ENSRNOG00000001874	11	87446382	87449940	-	Slc7a4	protein_coding	462.339	404.504	0.874909	-0.192795	0.0535081	0.38354
ENSRNOG00000019425	19	44164935	44175770	+	Gabarapl2	protein_coding	1005.06	1109.3	1.10371	0.142359	0.0536966	0.383624
ENSRNOG00000019425	19	44164935	44175770	+	Gabarapl2	protein_coding	1005.06	1109.3	1.10371	0.142359	0.0536966	0.383624
ENSRNOG00000015321	1	22124495	22206505	-	Moxd1	protein_coding	224.238	264.884	1.18127	0.240335	0.0536735	0.383624
ENSRNOG00000042536	2	40554146	41464264	+	Pde4d	protein_coding	511.98	576.555	1.12613	0.171371	0.0536538	0.383624
ENSRNOG00000002343	14	43133218	43143973	-	Uchl1	protein_coding	9549.08	10179.1	1.06597	0.0921715	0.0538162	0.384223
ENSRNOG00000042732	4	142453013	142453531	+	AABR07061755.1	protein_coding	91.1245	69.0151	0.757372	-0.400927	0.0539189	0.384445
ENSRNOG00000049912	3	172563105	172566010	-	Atp5e	protein_coding	801.767	896.484	1.11814	0.161095	0.0538863	0.384445
ENSRNOG00000017466	17	54181419	54212096	+	Kif5b	protein_coding	1224.78	1336.32	1.09107	0.125738	0.053964	0.384511
ENSRNOG00000010534	2	125288693	125323454	-	Ankrd50	protein_coding	559.332	494.001	0.883197	-0.179193	0.0541694	0.384919
ENSRNOG00000012759	9	30515089	30844199	-	Col19a1	protein_coding	287.968	234.368	0.81387	-0.297129	0.0542362	0.384919
ENSRNOG00000004713	10	99388130	99389898	+	Kcnj16	protein_coding	77.1651	101.748	1.31857	0.398978	0.0541302	0.384919
ENSRNOG00000011107	2	91450162	91497091	-	Pcsk1	protein_coding	474.071	536.78	1.13228	0.179229	0.0542039	0.384919
ENSRNOG00000016630	5	59033636	59063592	-	Tln1	protein_coding	519.366	456.942	0.879806	-0.184742	0.0541382	0.384919
ENSRNOG00000000186	7	119616324	119623072	-	Tst	protein_coding	335.719	390.408	1.1629	0.217732	0.0540571	0.384919
ENSRNOG00000016011	1	40389638	40520447	+	Plekhg1	protein_coding	132.596	103.73	0.782297	-0.354212	0.0543847	0.385719
ENSRNOG00000006304	7	60719066	60743328	-	Mdm2	protein_coding	259.093	303.535	1.17153	0.228392	0.0547	0.387443
ENSRNOG00000010011	4	80025440	80107884	-	Osbpl3	protein_coding	333.818	284.82	0.853219	-0.229012	0.054676	0.387443
ENSRNOG00000046889	13	36117119	36174908	-	Dbi	protein_coding	441.119	503.814	1.14213	0.191724	0.0550492	0.387777
ENSRNOG00000004789	13	111828043	111849653	-	Diexf	protein_coding	196.561	162.902	0.828759	-0.270975	0.055067	0.387777
ENSRNOG00000042929	13	88636875	88943592	-	LOC100361087	protein_coding	848.799	764.256	0.900397	-0.151366	0.055048	0.387777
ENSRNOG00000001068	12	13090172	13111873	+	Rac1	protein_coding	3523.65	3262.99	0.926026	-0.110876	0.0550719	0.387777
ENSRNOG00000014722	9	67293309	67341341	-	Raph1	protein_coding	539.478	477.207	0.884572	-0.176949	0.0548883	0.387777
ENSRNOG00000003767	13	109338762	109483891	-	Rps6kc1	protein_coding	1003.61	911.989	0.908711	-0.138106	0.0549788	0.387777
ENSRNOG00000001141	12	45727112	45882548	+	Srrm4	protein_coding	220.286	184.069	0.835591	-0.259131	0.054934	0.387777
ENSRNOG00000008465	4	78450724	78458179	-	Tmem176b	protein_coding	384.598	448.842	1.16704	0.222854	0.0547999	0.387777
ENSRNOG00000014879	6	10912383	11014278	+	Ttc7a	protein_coding	216.873	180.137	0.830613	-0.267752	0.0549666	0.387777
ENSRNOG00000049768	10	11392625	11512600	+	Adcy9	protein_coding	680.362	605.383	0.889796	-0.168454	0.055191	0.388188
ENSRNOG00000001628	11	36851038	36912229	+	Pcp4	protein_coding	954.05	850.494	0.891456	-0.165764	0.0552026	0.388188
ENSRNOG00000033608	8	63318019	63350269	-	Cd276	protein_coding	126.847	97.2684	0.766817	-0.383045	0.0552915	0.388306
ENSRNOG00000015503	1	124625985	124653820	+	Otud7a	protein_coding	422.585	369.65	0.874735	-0.193082	0.0552648	0.388306
ENSRNOG00000046794	5	147927152	147953093	-	Khdrbs1	protein_coding	1060.88	967.361	0.911844	-0.13314	0.0554851	0.38941
ENSRNOG00000057125	20	3552929	3575780	+	Ddr1	protein_coding	566.656	483.071	0.852494	-0.230238	0.0557904	0.391042
ENSRNOG00000020004	19	59874752	59894937	-	Rbm34	protein_coding	354.828	408.393	1.15096	0.202836	0.0557555	0.391042
ENSRNOG00000001351	12	40695520	40709462	+	Trafd1	protein_coding	685.649	614.589	0.896361	-0.157849	0.0558601	0.391276
ENSRNOG00000016924	10	88392248	88442845	-	Acly	protein_coding	3158.11	2943.31	0.931986	-0.101619	0.0560722	0.391555
ENSRNOG00000048927	15	64190606	64191115	-	LOC100361180	protein_coding	59.9715	80.6208	1.34432	0.426876	0.0560866	0.391555
ENSRNOG00000017545	17	42064376	42082300	+	Mrs2	protein_coding	322.524	270.57	0.838913	-0.253407	0.0561187	0.391555
ENSRNOG00000021513	3	72273424	72289310	-	Rtn4rl2	protein_coding	383.255	436.353	1.13855	0.187192	0.0560746	0.391555
ENSRNOG00000016091	9	79630604	79654688	+	Tmem169	protein_coding	186.214	153.422	0.823903	-0.279453	0.0560093	0.391555
ENSRNOG00000005064	10	37441284	37455022	-	Ube2b	protein_coding	846.193	932.482	1.10197	0.14009	0.056087	0.391555
ENSRNOG00000022691	18	73564247	73625137	+	St8sia5	protein_coding	521.575	459.82	0.8816	-0.181804	0.056203	0.391889
ENSRNOG00000010602	8	6013207	6034142	-	Birc2	protein_coding	274.645	319.626	1.16378	0.218815	0.0562777	0.391901
ENSRNOG00000012422	2	113984646	114384894	+	Tnik	protein_coding	1414.81	1300.56	0.919249	-0.121473	0.0562714	0.391901
ENSRNOG00000009253	8	28352772	28387383	+	Igsf9b	protein_coding	416.884	352.027	0.844426	-0.243957	0.0566669	0.394356
ENSRNOG00000046357	2	243700784	243740899	+	Adh4	protein_coding	516.878	586.68	1.13505	0.18275	0.0568597	0.395013
ENSRNOG00000046357	2	243700784	243740899	+	Adh4	protein_coding	516.878	586.68	1.13505	0.18275	0.0568597	0.395013
ENSRNOG00000045743	2	235738416	235760352	+	Etnppl	protein_coding	109.329	137.667	1.2592	0.332504	0.0568813	0.395013
ENSRNOG00000022116	15	37400889	37410848	-	Gjb6	protein_coding	191.65	227.616	1.18766	0.248126	0.0570208	0.395013
ENSRNOG00000036696	10	109638767	109657456	+	Hgs	protein_coding	1492.66	1361.2	0.911929	-0.133006	0.056917	0.395013
ENSRNOG00000059968	1	247398598	247458509	+	Jak2	protein_coding	578.364	644.957	1.11514	0.157224	0.0571804	0.395013
ENSRNOG00000004640	14	84330218	84334066	-	Mtfp1	protein_coding	189.474	226.186	1.19376	0.255507	0.0571453	0.395013
ENSRNOG00000028648	11	31428358	31430517	+	Olig1	protein_coding	557.368	481.872	0.86455	-0.209979	0.057236	0.395013
ENSRNOG00000028580	19	58583632	58735173	-	Pcnxl2	protein_coding	1064.76	970.473	0.911451	-0.133763	0.0571342	0.395013
ENSRNOG00000009419	15	12926167	13228607	-	Ptprg	protein_coding	510.296	452.642	0.887018	-0.172964	0.0572392	0.395013
ENSRNOG00000012629	9	38470298	38495176	-	Rab23	protein_coding	455.651	396.328	0.869805	-0.201236	0.0571803	0.395013
ENSRNOG00000002353	13	103157806	103228423	+	Rab3gap2	protein_coding	1256.29	1134.32	0.90291	-0.147347	0.0569831	0.395013
ENSRNOG00000011854	4	68569691	68597586	-	RGD1563986	protein_coding	281.192	326.771	1.1621	0.216728	0.0571511	0.395013
ENSRNOG00000000236	10	67762995	67774787	+	Zfp207	protein_coding	890.148	981.19	1.10228	0.140488	0.0569993	0.395013
ENSRNOG00000019097	16	7336685	7345511	+	Bap1	protein_coding	2463.65	2645.17	1.07368	0.102566	0.0573079	0.395233
ENSRNOG00000012469	8	70447040	70471137	+	Vwa9	protein_coding	382.763	435.182	1.13695	0.185168	0.0574845	0.396197
ENSRNOG00000010235	3	160047296	160115177	+	Pkig	protein_coding	585.118	654.272	1.11819	0.161162	0.0575821	0.396615
ENSRNOG00000017453	18	63415306	63488027	-	Ptpn2	protein_coding	96.7469	123.678	1.27837	0.354301	0.0577033	0.397196
ENSRNOG00000029598	11	11062790	11585765	-	Robo2	protein_coding	1934.09	1788.23	0.924584	-0.113124	0.0578042	0.397635
ENSRNOG00000047931	X	28593405	28595395	+	Tmsb4x	protein_coding	5326.79	5738.93	1.07737	0.107515	0.0578869	0.397949
ENSRNOG00000047931	X	28593405	28595395	+	Tmsb4x	protein_coding	5326.79	5738.93	1.07737	0.107515	0.0578869	0.397949
ENSRNOG00000012236	1	142136452	142138737	+	Hddc3	protein_coding	176.753	211.578	1.19703	0.259456	0.0580763	0.398732
ENSRNOG00000005387	X	15098904	15102340	+	Rbm3	protein_coding	427.095	364.267	0.852894	-0.229561	0.0581174	0.398732
ENSRNOG00000039871	15	12872408	12889108	-	RGD1306063	protein_coding	272.563	316.437	1.16097	0.215328	0.0580777	0.398732
ENSRNOG00000025554	8	131888047	131899023	-	Zfp445	protein_coding	423.814	480.378	1.13346	0.180738	0.0581492	0.398732
ENSRNOG00000060979	11	14144130	14160892	-	Hspa13	protein_coding	768.237	853.329	1.11076	0.151551	0.0582024	0.398842
ENSRNOG00000009265	7	113903557	113937941	-	Kcnk9	protein_coding	282.239	237.136	0.840194	-0.251205	0.05832	0.399268
ENSRNOG00000005193	10	55571118	55589978	-	Pfas	protein_coding	663.539	592.332	0.892687	-0.163774	0.0583434	0.399268
ENSRNOG00000015925	2	52504315	52531085	-	Zfp131	protein_coding	356.835	410.309	1.14986	0.201455	0.058376	0.399268
ENSRNOG00000006137	5	151904684	151977636	-	Arid1a	protein_coding	1551.96	1409.69	0.908329	-0.138714	0.0584703	0.399405
ENSRNOG00000001808	4	180855800	180887050	-	Asun	protein_coding	173.267	207.695	1.1987	0.26147	0.0584548	0.399405
ENSRNOG00000024128	7	123102468	123145635	+	Aco2	protein_coding	5625.59	6010.88	1.06849	0.0955716	0.058546	0.399646
ENSRNOG00000007801	7	70697050	70805221	+	R3hdm2	protein_coding	2784.98	2589.98	0.92998	-0.104729	0.0585801	0.399646
ENSRNOG00000005228	7	28956512	29022868	+	Gnptab	protein_coding	782.299	697.124	0.891122	-0.166306	0.0586779	0.39989
ENSRNOG00000001658	11	35024196	35099383	-	Kcnj6	protein_coding	310.252	262.188	0.845078	-0.242843	0.0586902	0.39989
ENSRNOG00000011222	12	47074200	47076572	+	Dynll1	protein_coding	2514.86	2731.12	1.08599	0.119011	0.058739	0.399969
ENSRNOG00000009090	15	32868087	32888095	-	Dad1	protein_coding	614.854	686.293	1.11619	0.158581	0.0590068	0.400656
ENSRNOG00000005053	6	75050329	75075795	-	Egln3	protein_coding	362.79	306.116	0.843783	-0.245056	0.059101	0.400656
ENSRNOG00000027860	10	72156728	72188308	-	Ggnbp2	protein_coding	804.975	888.546	1.10382	0.142504	0.0590741	0.400656
ENSRNOG00000001190	12	47590154	47631119	+	Git2	protein_coding	521.329	460.842	0.883975	-0.177923	0.0590174	0.400656
ENSRNOG00000020361	8	117574161	117599848	+	Ip6k2	protein_coding	554.614	621.099	1.11988	0.163339	0.0589275	0.400656
ENSRNOG00000016892	16	19769968	19777414	-	Nr2f6	protein_coding	243.117	285.103	1.1727	0.229832	0.0589382	0.400656
ENSRNOG00000004362	6	124557913	124735778	-	Rps6ka5	protein_coding	382.867	437.853	1.14362	0.193604	0.0590685	0.400656
ENSRNOG00000010183	2	178679041	178750668	+	Fam198b	protein_coding	143.631	113.686	0.791518	-0.337306	0.0592519	0.401426
ENSRNOG00000018898	8	62324092	62332115	-	Mpi	protein_coding	394.534	343.192	0.869868	-0.201131	0.0593662	0.401947
ENSRNOG00000021068	2	196227670	196270826	-	Pip5k1a	protein_coding	998.2	1099.3	1.10128	0.139179	0.0594573	0.402057
ENSRNOG00000014090	4	100465170	100474301	+	Retsat	protein_coding	269.278	322.508	1.19768	0.260241	0.0594334	0.402057
ENSRNOG00000030628	10	56271257	56276764	-	Eif4a1	protein_coding	1932.08	2081.7	1.07744	0.107609	0.059566	0.402159
ENSRNOG00000024402	5	106409456	106730684	+	Focad	protein_coding	976.869	880.886	0.901744	-0.149211	0.0596969	0.402159
ENSRNOG00000007600	X	136792643	136807885	-	Igsf1	protein_coding	345.366	401.123	1.16145	0.215922	0.0595982	0.402159
ENSRNOG00000005509	3	129042742	129357491	-	Pak7	protein_coding	856.914	949.567	1.10812	0.148119	0.059661	0.402159
ENSRNOG00000061499	7	140489492	140546908	-	Prkag1	protein_coding	2813.56	2542.27	0.903578	-0.146279	0.0595589	0.402159
ENSRNOG00000061499	7	140489492	140546908	-	Prkag1	protein_coding	2813.56	2542.27	0.903578	-0.146279	0.0595589	0.402159
ENSRNOG00000003583	13	108642156	108686290	+	Smyd2	protein_coding	929.377	1023.61	1.10139	0.139327	0.0596708	0.402159
ENSRNOG00000021138	2	196487656	196496986	+	Cers2	protein_coding	284.042	242.229	0.852793	-0.229733	0.0598464	0.402437
ENSRNOG00000002618	13	68702820	68722472	+	Ivns1abp	protein_coding	1189.78	1300.18	1.09279	0.128018	0.0599168	0.402437
ENSRNOG00000029264	16	20336638	20348804	+	Kcnn1	protein_coding	223.796	188.19	0.840902	-0.249991	0.0598973	0.402437
ENSRNOG00000002176	11	57897879	57993548	-	Pvrl3	protein_coding	123.728	155.525	1.25699	0.329976	0.0599255	0.402437
ENSRNOG00000006729	6	126018841	126153867	+	Slc24a4	protein_coding	309.868	361.805	1.16761	0.223555	0.0599166	0.402437
ENSRNOG00000019140	19	54766589	54840569	+	Banp	protein_coding	241.826	285.488	1.18055	0.239462	0.0602394	0.403946
ENSRNOG00000015304	1	78417719	78420427	+	Tmem160	protein_coding	285.836	338.421	1.18397	0.243631	0.060263	0.403946
ENSRNOG00000013288	15	52357853	52443055	-	Xpo7	protein_coding	1411.96	1531.9	1.08495	0.117625	0.0602394	0.403946
ENSRNOG00000024663	5	78133886	78183122	-	Fkbp15	protein_coding	467.405	410.575	0.878414	-0.187028	0.0603096	0.404007
ENSRNOG00000010048	4	114876770	114896573	+	Dctn1	protein_coding	6462.9	6012.51	0.930312	-0.104213	0.0605585	0.404397
ENSRNOG00000026704	X	105239620	105289808	+	Drp2	protein_coding	1639.34	1492.02	0.910137	-0.135845	0.0605305	0.404397
ENSRNOG00000005985	15	344360	1047956	+	Kcnma1	protein_coding	1376	1230.59	0.894325	-0.161128	0.0605882	0.404397
ENSRNOG00000013656	5	75557042	75676584	-	Lpar1	protein_coding	344.15	231.214	0.671841	-0.573809	0.0605511	0.404397
ENSRNOG00000004711	6	137924293	137950075	+	Mta1	protein_coding	864.9	784.555	0.907104	-0.140659	0.060546	0.404397
ENSRNOG00000051621	1	222179436	222182721	-	Tex40	protein_coding	187.699	151.032	0.804649	-0.313569	0.0605936	0.404397
ENSRNOG00000016033	3	8741766	8744592	+	Endog	protein_coding	60.0804	80.617	1.34182	0.424191	0.0606645	0.404618
ENSRNOG00000016989	3	8850154	8852192	-	Dolk	protein_coding	184.262	152.163	0.825795	-0.276144	0.0607055	0.404641
ENSRNOG00000001429	12	23574187	23587276	+	Lrwd1	protein_coding	156.319	125.246	0.801219	-0.319731	0.0607662	0.404794
ENSRNOG00000006393	7	10937599	10943063	+	Sirt6	protein_coding	253.123	213.372	0.842959	-0.246465	0.0608887	0.405359
ENSRNOG00000054063	8	116336441	116339690	+	Nat6	protein_coding	227.999	269.525	1.18213	0.241391	0.0609896	0.405779
ENSRNOG00000019659	10	59867781	59892708	-	Aspa	protein_coding	78.6767	57.2347	0.727466	-0.459048	0.0611656	0.406242
ENSRNOG00000016267	1	204245645	204322544	-	Chst15	protein_coding	237.239	199.548	0.841129	-0.2496	0.0611727	0.406242
ENSRNOG00000046799	10	83476107	83488878	+	Phb	protein_coding	810.324	891.94	1.10072	0.138447	0.0611683	0.406242
ENSRNOG00000008659	17	87725867	87826421	-	Arhgap21	protein_coding	2653.02	2463.01	0.928379	-0.107215	0.0612729	0.406657
ENSRNOG00000025130	3	111553680	111560556	-	Ltk	protein_coding	277.167	236.831	0.854469	-0.226899	0.0613641	0.406803
ENSRNOG00000013780	10	66690133	66928903	+	Nf1	protein_coding	1519.18	1379.4	0.907991	-0.139251	0.0613706	0.406803
ENSRNOG00000018533	4	157659147	157676331	+	Iffo1	protein_coding	635.822	564.43	0.887717	-0.171829	0.061471	0.407217
ENSRNOG00000053945	9	13446896	13490669	+	Daam2	protein_coding	270.703	228.004	0.842266	-0.247652	0.0615586	0.407546
ENSRNOG00000001599	11	27085711	27094364	-	Rwdd2b	protein_coding	139.376	171.562	1.23093	0.29975	0.0617516	0.408572
ENSRNOG00000060141	17	47397558	47422182	+	Epdr1	protein_coding	1133.06	1237.46	1.09213	0.127151	0.0618694	0.408639
ENSRNOG00000004084	6	39358985	39363458	-	Fam84a	protein_coding	800.336	882.523	1.10269	0.141029	0.0618871	0.408639
ENSRNOG00000018500	17	77642302	77687456	-	Frmd4a	protein_coding	197.269	164.551	0.834142	-0.261636	0.0618093	0.408639
ENSRNOG00000001963	11	38035450	38059950	+	Mx2	protein_coding	127.147	159.751	1.25643	0.329328	0.061933	0.408639
ENSRNOG00000005426	8	61615650	61648390	+	Snupn	protein_coding	120.788	150.859	1.24896	0.320724	0.0619519	0.408639
ENSRNOG00000005775	4	38240728	38420205	+	Phf14	protein_coding	510.325	573.108	1.12303	0.167392	0.0620312	0.408911
ENSRNOG00000018387	18	59096643	59396318	+	Wdr7	protein_coding	3211.02	2983.14	0.929033	-0.106198	0.0622053	0.409807
ENSRNOG00000006283	8	6749744	6750456	-	LOC100362400	pseudogene	491.904	560.737	1.13993	0.188948	0.0623095	0.410242
ENSRNOG00000030334	7	117643206	117661845	+	Adck5	protein_coding	155.997	126.556	0.811269	-0.301748	0.06239	0.41027
ENSRNOG00000004281	14	92342957	92577936	-	Cobl	protein_coding	1824.85	1678.76	0.919944	-0.120383	0.0623671	0.41027
ENSRNOG00000015720	19	10575060	10581842	-	Polr2c	protein_coding	389.932	442.099	1.13378	0.181147	0.0624483	0.410402
ENSRNOG00000003549	7	2737765	2742369	+	Cnpy2	protein_coding	342.603	391.518	1.14277	0.192539	0.0625471	0.410778
ENSRNOG00000014284	8	23125988	23130877	-	Elof1	protein_coding	330.941	379.426	1.14651	0.197244	0.062582	0.410778
ENSRNOG00000007405	4	78024765	78046066	+	Krba1	protein_coding	358.739	312.265	0.870451	-0.200165	0.062797	0.411937
ENSRNOG00000020626	10	15686008	15689325	-	Snrnp25	protein_coding	117.449	146.988	1.2515	0.323657	0.0628718	0.412177
ENSRNOG00000046891	20	31912262	31956649	-	Hk1	protein_coding	4464.94	4184.54	0.937199	-0.0935721	0.063052	0.413106
ENSRNOG00000012505	2	34290199	34313094	-	Ppwd1	protein_coding	69.2885	90.6543	1.30836	0.387759	0.0631095	0.413231
ENSRNOG00000032948	8	22124560	22150005	-	Tyk2	protein_coding	207.049	173.598	0.838438	-0.254224	0.0632761	0.413824
ENSRNOG00000017001	10	83556809	83572019	+	Zfp652	protein_coding	130.3	103.721	0.796012	-0.329137	0.0632772	0.413824
ENSRNOG00000016553	5	157002826	157059508	-	Vwa5b1	protein_coding	133.943	104.056	0.776864	-0.364266	0.0634616	0.414778
ENSRNOG00000017051	16	6903212	6958783	+	Tmem110	protein_coding	163.944	133.322	0.813218	-0.298286	0.0636155	0.414886
ENSRNOG00000003980	10	29342495	29367865	-	Ttc1	protein_coding	446.657	503.391	1.12702	0.172513	0.0635534	0.414886
ENSRNOG00000008316	3	112087677	112125318	-	Vps39	protein_coding	1249.83	1363.11	1.09064	0.125174	0.0635766	0.414886
ENSRNOG00000014712	10	45220282	45243672	-	Zfp39	protein_coding	100.966	78.0171	0.772709	-0.372002	0.0636326	0.414886
ENSRNOG00000010217	3	11198401	11248558	+	Prrc2b	protein_coding	5357.39	4957.43	0.925344	-0.111938	0.0638216	0.415614
ENSRNOG00000060436	6	102339857	102353403	-	Vti1b	protein_coding	540.229	605.114	1.12011	0.163635	0.0637958	0.415614
ENSRNOG00000016707	4	71652354	71670239	+	Casp2	protein_coding	228.737	191.775	0.838408	-0.254276	0.0638981	0.415755
ENSRNOG00000043197	7	123482255	123490023	+	LOC688613	protein_coding	260.516	301.951	1.15905	0.212943	0.0639207	0.415755
ENSRNOG00000020935	1	221346066	221370322	-	Capn1	protein_coding	94.4104	72.2046	0.764794	-0.386856	0.0640229	0.416168
ENSRNOG00000008712	5	79382096	79407433	+	RGD1304595	protein_coding	149.311	121.376	0.812909	-0.298834	0.0641828	0.416955
ENSRNOG00000026616	4	67378188	67385266	+	Ndufb2	protein_coding	630.769	706.884	1.12067	0.164363	0.0642508	0.417145
ENSRNOG00000008169	5	105336262	105582375	-	Slc24a2	protein_coding	3835.5	3172.95	0.827257	-0.273593	0.0644569	0.41823
ENSRNOG00000047574	6	112133204	114067564	+	Nrxn3	protein_coding	2107.93	1943.83	0.922153	-0.116922	0.0646224	0.419051
ENSRNOG00000019959	1	100593680	100607874	+	Kcnc3	protein_coding	1100.06	1002.07	0.910919	-0.134605	0.0647115	0.419181
ENSRNOG00000033623	11	71938388	71954224	+	Pigx	protein_coding	183.286	217.789	1.18825	0.248834	0.0647902	0.419181
ENSRNOG00000009636	4	84678975	84740909	-	Scrn1	protein_coding	4336.24	4066.83	0.93787	-0.0925402	0.0647985	0.419181
ENSRNOG00000014311	15	33369216	33428973	-	Slc7a8	protein_coding	1114.38	1006.97	0.903615	-0.14622	0.0647793	0.419181
ENSRNOG00000020388	1	200037749	200116524	+	Inpp5f	protein_coding	487.516	428.932	0.879833	-0.184699	0.0649238	0.419739
ENSRNOG00000054172	8	129617812	129627372	+	Ctnnb1	protein_coding	3450.81	3225.1	0.934594	-0.0975882	0.0651396	0.419783
ENSRNOG00000045918	17	20184245	20364714	-	Jarid2	protein_coding	375.85	325.97	0.867287	-0.205418	0.0652699	0.419783
ENSRNOG00000021082	1	101859346	101870232	+	Kdelr1	protein_coding	612.359	546.513	0.892471	-0.164123	0.0651711	0.419783
ENSRNOG00000025154	1	281863918	281864304	+	LOC100359574	protein_coding	68.1694	90.0364	1.32078	0.401385	0.065237	0.419783
ENSRNOG00000026793	7	27309966	27363394	+	Nt5dc3	protein_coding	771.585	694.246	0.899766	-0.152378	0.0652929	0.419783
ENSRNOG00000001643	11	36327800	36337256	-	Psmg1	protein_coding	241.823	282.308	1.16742	0.223319	0.0651013	0.419783
ENSRNOG00000006130	7	3104551	3123297	-	Rab5b	protein_coding	2553.26	2741.15	1.07359	0.10244	0.065243	0.419783
ENSRNOG00000013529	3	160467552	160546540	+	Stk4	protein_coding	334.193	381.699	1.14215	0.191753	0.0650574	0.419783
ENSRNOG00000004198	6	65089318	65319527	-	Stxbp6	protein_coding	400.037	456.697	1.14164	0.191104	0.0652047	0.419783
ENSRNOG00000005308	3	72073431	72081079	-	Tmx2	protein_coding	1564.51	1687.46	1.07858	0.109139	0.0653212	0.419783
ENSRNOG00000017849	18	29497863	29504995	-	Apbb3	protein_coding	441.877	388.111	0.878323	-0.187176	0.0654122	0.420116
ENSRNOG00000009347	4	119249682	119327822	-	Arhgap25	protein_coding	376.69	329.006	0.873414	-0.195262	0.0655305	0.420423
ENSRNOG00000018849	18	36829062	36889966	+	Tcerg1	protein_coding	1096.07	998.689	0.911153	-0.134234	0.0655382	0.420423
ENSRNOG00000006622	7	24534615	24634097	+	Cry1	protein_coding	73.3245	95.3229	1.30001	0.378527	0.0657372	0.421448
ENSRNOG00000057881	7	11712188	11724843	-	Sppl2b	protein_coding	327.856	282.942	0.863007	-0.212556	0.0658025	0.421615
ENSRNOG00000021173	2	198123748	198184739	-	Vps45	protein_coding	601.838	668.815	1.11129	0.152233	0.0658793	0.421855
ENSRNOG00000001829	11	89557273	89591175	+	Ube2v2	protein_coding	633.369	705.243	1.11348	0.155075	0.0659528	0.422074
ENSRNOG00000051719	6	132116518	132183434	-	AABR07065498.1	protein_coding	153.438	185.401	1.20832	0.272998	0.0665547	0.422978
ENSRNOG00000003512	10	27310725	27366665	-	Gabra1	protein_coding	5796.94	5461.9	0.942204	-0.0858889	0.0665264	0.422978
ENSRNOG00000009421	3	110669312	110690173	+	Ivd	protein_coding	553.288	617.682	1.11638	0.158833	0.0662812	0.422978
ENSRNOG00000018784	19	54553419	54613477	+	Jph3	protein_coding	3104.31	3320.07	1.0695	0.0969384	0.0663529	0.422978
ENSRNOG00000046829	14	34727623	34787183	+	Kdr	protein_coding	101.092	76.9043	0.760737	-0.394529	0.0663776	0.422978
ENSRNOG00000031544	10	43446526	43498066	+	Larp1	protein_coding	1056.93	963.574	0.911674	-0.13341	0.0663997	0.422978
ENSRNOG00000026569	1	62133816	62174310	+	LOC102555377	protein_coding	72.6914	94.5785	1.3011	0.379728	0.0662322	0.422978
ENSRNOG00000023605	5	61734118	61766481	+	Ncbp1	protein_coding	598.855	665.682	1.11159	0.152626	0.0665216	0.422978
ENSRNOG00000020068	8	117351629	117353672	-	Ndufaf3	protein_coding	342.712	392.53	1.14536	0.195805	0.0666057	0.422978
ENSRNOG00000042421	5	142844079	142845116	-	RGD1559909	protein_coding	351.423	404.587	1.15128	0.203239	0.0661543	0.422978
ENSRNOG00000052444	4	28305002	28310178	-	RGD1563091	protein_coding	566.386	640.735	1.13127	0.177943	0.0665791	0.422978
ENSRNOG00000010492	10	84890932	84920886	-	Sp2	protein_coding	183.342	151.566	0.826682	-0.274596	0.0665105	0.422978
ENSRNOG00000008301	13	90807199	90814119	-	Tagln2	protein_coding	97.0423	121.693	1.25402	0.326566	0.0661912	0.422978
ENSRNOG00000046950	4	24612205	24640686	+	LOC100912481	protein_coding	129.304	102.606	0.79352	-0.333661	0.0668159	0.423792
ENSRNOG00000000977	12	2069959	2097904	+	Pnpla6	protein_coding	673.228	602.423	0.894828	-0.160318	0.0667972	0.423792
ENSRNOG00000011293	16	32519924	32540217	-	RGD1311747	protein_coding	423.64	478.351	1.12914	0.175229	0.0668522	0.423792
ENSRNOG00000055319	14	78973364	78975166	+	Mrfap1	protein_coding	1966.55	2116.07	1.07603	0.105721	0.0668933	0.423802
ENSRNOG00000005975	7	73213581	73216251	-	LOC100362027	protein_coding	1073.43	1182.16	1.10129	0.139198	0.0670111	0.424049
ENSRNOG00000015218	1	196857461	196884302	-	Nsmce1	protein_coding	117.028	144.762	1.23699	0.306832	0.0669812	0.424049
ENSRNOG00000017678	1	36954496	36957300	-	AABR07001064.1	pseudogene	330.961	284.62	0.859979	-0.217627	0.0673047	0.424959
ENSRNOG00000008055	5	24434872	24446406	+	Ccne2	protein_coding	72.5627	53.3629	0.735404	-0.443391	0.0672458	0.424959
ENSRNOG00000011559	2	225005019	225036188	+	Cnn3	protein_coding	741.242	825.808	1.11409	0.155862	0.0672285	0.424959
ENSRNOG00000039980	X	123404518	123407645	+	Slc25a5	protein_coding	1761.06	1899.29	1.07849	0.109017	0.0673132	0.424959
ENSRNOG00000009451	5	128174835	128186532	-	Prpf38a	protein_coding	186.387	222.284	1.1926	0.254108	0.0675137	0.425975
ENSRNOG00000017222	1	204861566	204887377	+	Fam175b	protein_coding	293.327	340.774	1.16175	0.216304	0.0675824	0.426158
ENSRNOG00000030149	14	28393394	28967980	-	Adgrl3	protein_coding	837.783	757.546	0.904228	-0.145242	0.0676802	0.426524
ENSRNOG00000018296	19	31815319	31867850	-	Anapc10	protein_coding	98.5071	124.745	1.26635	0.340679	0.0680148	0.426956
ENSRNOG00000012623	16	2338333	2354909	+	Arf4	protein_coding	784.315	863.847	1.1014	0.139343	0.0679742	0.426956
ENSRNOG00000016671	18	14471213	14657332	+	Dtna	protein_coding	667.524	597.32	0.894829	-0.160317	0.0679109	0.426956
ENSRNOG00000008704	10	65840052	65963932	-	Nlk	protein_coding	1112.27	1009.53	0.907627	-0.139829	0.0678935	0.426956
ENSRNOG00000018835	2	200187184	200317621	+	Notch2	protein_coding	160.303	131.065	0.817608	-0.290519	0.0679366	0.426956
ENSRNOG00000013322	X	62382608	62698830	-	Pola1	protein_coding	50.9277	70.404	1.38243	0.467206	0.0678414	0.426956
ENSRNOG00000025793	1	191615146	191676915	-	Usp31	protein_coding	991.65	898.716	0.906283	-0.141966	0.0680269	0.426956
ENSRNOG00000042592	1	199782078	199823386	-	Rgs10	protein_coding	285.237	328.644	1.15218	0.204364	0.068104	0.42714
ENSRNOG00000016070	2	123329875	123407496	-	Trpc3	protein_coding	234.784	199.117	0.848086	-0.237717	0.0681356	0.42714
ENSRNOG00000019143	19	57047830	57115132	+	Galnt2	protein_coding	988.914	893.162	0.903174	-0.146924	0.0682899	0.427407
ENSRNOG00000014562	4	149957206	149978895	+	Hnrnpf	protein_coding	576.948	643.529	1.1154	0.157563	0.0682977	0.427407
ENSRNOG00000027988	3	156764751	156777999	-	Zhx3	protein_coding	344.069	393.353	1.14324	0.193129	0.068239	0.427407
ENSRNOG00000015380	10	88279632	88307412	-	Jup	protein_coding	921.583	823.403	0.893466	-0.162516	0.0683943	0.427514
ENSRNOG00000009772	8	36125999	36254753	+	Kirrel3	protein_coding	505.103	446.419	0.883819	-0.178177	0.0683707	0.427514
ENSRNOG00000052275	14	86687782	86706626	-	H2afv	protein_coding	127.375	156.458	1.22832	0.29669	0.0687883	0.429477
ENSRNOG00000052275	14	86687782	86706626	-	H2afv	protein_coding	127.375	156.458	1.22832	0.29669	0.0687883	0.429477
ENSRNOG00000052275	14	86687782	86706626	-	H2afv	protein_coding	127.375	156.458	1.22832	0.29669	0.0687883	0.429477
ENSRNOG00000052275	14	86687782	86706626	-	H2afv	protein_coding	127.375	156.458	1.22832	0.29669	0.0687883	0.429477
ENSRNOG00000004004	6	124142395	124177404	-	Nrde2	protein_coding	109.287	86.0154	0.787059	-0.345457	0.0687698	0.429477
ENSRNOG00000008672	5	57267312	57284448	+	Chmp5	protein_coding	609.882	682.062	1.11835	0.161373	0.0688614	0.429684
ENSRNOG00000049531	8	117280705	117291351	+	Usp19	protein_coding	1228.07	1126.1	0.916965	-0.125061	0.069021	0.43043
ENSRNOG00000005404	3	108984029	109044420	-	Rasgrp1	protein_coding	5762	5428.92	0.942195	-0.0859026	0.0693503	0.432232
ENSRNOG00000054838	7	140910423	140919234	-	Mcrs1	protein_coding	836.578	754.782	0.902225	-0.148441	0.0695861	0.43296
ENSRNOG00000019439	1	224991222	224994653	-	Polr2g	protein_coding	339.433	387.368	1.14122	0.190579	0.0695858	0.43296
ENSRNOG00000023035	5	50230619	50239458	-	Smim8	protein_coding	61.5853	81.2927	1.32	0.40054	0.0695879	0.43296
ENSRNOG00000052343	2	243820661	243852631	+	Eif4e	protein_coding	820.659	902.547	1.09978	0.137218	0.0696741	0.433048
ENSRNOG00000019857	7	11582984	11628929	+	Gng7	protein_coding	637.501	706.263	1.10786	0.147777	0.0697068	0.433048
ENSRNOG00000001849	11	88211599	88273254	-	Mapk1	protein_coding	2750.62	2940.42	1.069	0.0962657	0.0697229	0.433048
ENSRNOG00000029574	4	35729628	35730599	-	Rps4x-ps9	protein_coding	88.1816	111.596	1.26553	0.339738	0.0697863	0.433191
ENSRNOG00000017610	18	60392376	60719720	+	Nedd4l	protein_coding	1331.76	1221.14	0.916941	-0.1251	0.0700014	0.434275
ENSRNOG00000002627	13	107433588	107471843	-	Kctd3	protein_coding	884.826	804.956	0.909733	-0.136485	0.0700687	0.434442
ENSRNOG00000009224	10	13815293	13826945	-	E4f1	protein_coding	190.657	158.818	0.833004	-0.263605	0.0702151	0.434445
ENSRNOG00000005386	7	42269784	42351054	+	Kitlg	protein_coding	204.072	240.054	1.17632	0.234283	0.0702311	0.434445
ENSRNOG00000019184	2	61888950	61949926	-	Npr3	protein_coding	189.054	156.952	0.830198	-0.268473	0.0702177	0.434445
ENSRNOG00000013061	16	56247659	56396502	+	Tusc3	protein_coding	2134.97	2295.78	1.07532	0.104767	0.0702713	0.434445
ENSRNOG00000011627	2	62150251	62213048	+	Zfr	protein_coding	3421.39	3648.31	1.06633	0.0926475	0.0702075	0.434445
ENSRNOG00000002881	13	88317145	88436789	-	Ddr2	protein_coding	126.895	99.6939	0.785639	-0.348061	0.0705033	0.435469
ENSRNOG00000005391	5	7627771	7941822	-	Prex2	protein_coding	1031.88	1150.9	1.11534	0.157484	0.0705179	0.435469
ENSRNOG00000019692	10	15164439	15166457	-	Metrn	protein_coding	295.463	341.675	1.15641	0.20965	0.0706329	0.435736
ENSRNOG00000022267	X	73894785	73895415	-	Rn50_X_0747.1	processed_pseudogene	311.334	269.464	0.865516	-0.208368	0.0706423	0.435736
ENSRNOG00000020772	10	89645973	89683446	+	Dhx8	protein_coding	580.275	519.298	0.894917	-0.160175	0.0706909	0.435785
ENSRNOG00000019428	8	130482493	130491998	-	Higd1a	protein_coding	611.226	677.781	1.10889	0.149114	0.0708035	0.436229
ENSRNOG00000001348	12	40619377	40625883	+	Erp29	protein_coding	443.426	499.892	1.12734	0.172926	0.0712955	0.438255
ENSRNOG00000038427	14	78359682	78377825	-	Gm1043	protein_coding	121.451	148.863	1.2257	0.293612	0.071294	0.438255
ENSRNOG00000007851	6	93423002	93444240	+	Psma3	protein_coding	882.126	972.075	1.10197	0.140082	0.0711888	0.438255
ENSRNOG00000007851	6	93423002	93444240	+	Psma3	protein_coding	882.126	972.075	1.10197	0.140082	0.0711888	0.438255
ENSRNOG00000008829	15	51859462	51890832	-	Sorbs3	protein_coding	225.271	190.127	0.843991	-0.2447	0.0712918	0.438255
ENSRNOG00000005447	10	74243812	74298599	-	Ypel2	protein_coding	499.578	444.902	0.890555	-0.167223	0.0714767	0.439118
ENSRNOG00000018697	9	82373946	82382272	-	Abcb6	protein_coding	488.03	430.777	0.882686	-0.180028	0.0719442	0.439951
ENSRNOG00000013623	15	40665041	40667173	+	Amer2	protein_coding	167.106	201.162	1.2038	0.267594	0.0719514	0.439951
ENSRNOG00000011105	2	45668969	46050564	+	Arl15	protein_coding	53.2319	71.7175	1.34727	0.430036	0.0717377	0.439951
ENSRNOG00000015357	8	24369916	24615479	+	Bmper	protein_coding	271.251	230.521	0.849845	-0.234728	0.071983	0.439951
ENSRNOG00000030790	3	72002152	72053049	-	Ctnnd1	protein_coding	837.806	918.162	1.09591	0.132133	0.0718907	0.439951
ENSRNOG00000016724	9	117538009	117666410	+	Epb41l3	protein_coding	1879.96	1735	0.92289	-0.115769	0.0718163	0.439951
ENSRNOG00000049281	2	188516582	188522601	+	Gba	protein_coding	1090.81	997.957	0.91488	-0.128346	0.0720626	0.439951
ENSRNOG00000057367	16	10662021	10695557	+	Glud1	protein_coding	2977.65	3193.53	1.0725	0.100976	0.0720358	0.439951
ENSRNOG00000019895	15	34340607	34352673	-	Nedd8	protein_coding	1084.87	1190.76	1.0976	0.134359	0.0719872	0.439951
ENSRNOG00000015191	4	155093949	155116154	-	Phc1	protein_coding	537.003	479.495	0.89291	-0.163414	0.0720179	0.439951
ENSRNOG00000001613	11	47079234	47113993	-	Zbtb11	protein_coding	635.457	707.491	1.11336	0.154915	0.0718443	0.439951
ENSRNOG00000007462	10	38877422	38906482	+	Sept8	protein_coding	4697.02	4409.28	0.938738	-0.0912057	0.0724079	0.440482
ENSRNOG00000048061	9	9863404	9865920	-	Brcc3	protein_coding	229.183	194.966	0.850701	-0.233277	0.0725187	0.440482
ENSRNOG00000017857	9	16629401	16643182	-	Cul7	protein_coding	479.422	425.277	0.887063	-0.172891	0.0723195	0.440482
ENSRNOG00000016725	5	73503407	73552798	-	Ikbkap	protein_coding	1250.23	1147.32	0.917685	-0.123929	0.0722709	0.440482
ENSRNOG00000003177	10	25832072	25847994	-	Mat2b	protein_coding	1815.93	1677.37	0.923696	-0.11451	0.0723847	0.440482
ENSRNOG00000002894	10	61685241	61700491	+	Mnt	protein_coding	612.165	677.297	1.1064	0.145869	0.0723143	0.440482
ENSRNOG00000009094	7	36643916	36660141	-	Nudt4	protein_coding	2058.94	1894.64	0.920201	-0.119978	0.0724819	0.440482
ENSRNOG00000007979	3	56030915	56038075	+	Phospho2	protein_coding	262.271	303.825	1.15844	0.212182	0.0724781	0.440482
ENSRNOG00000017508	1	72666665	72674271	-	Suv420h2	protein_coding	147.109	119.714	0.813776	-0.297297	0.0724457	0.440482
ENSRNOG00000000417	1	167051209	167091453	+	Numa1	protein_coding	1085.96	997.653	0.918681	-0.122364	0.0726832	0.441232
ENSRNOG00000001199	12	47138346	47142852	-	Pop5	protein_coding	357.92	406.506	1.13574	0.183639	0.0727832	0.44159
ENSRNOG00000019316	9	96210750	96288903	+	Sh3bp4	protein_coding	264.453	223.676	0.845805	-0.241604	0.0728343	0.44165
ENSRNOG00000016753	18	74461055	74485139	-	Slc14a1	protein_coding	231.278	271.929	1.17577	0.2336	0.07293	0.441982
ENSRNOG00000003816	13	84588351	84603134	+	Tada1	protein_coding	219.643	185.935	0.846533	-0.240362	0.0730441	0.442423
ENSRNOG00000019221	2	210833884	210839295	-	Gstm4	protein_coding	158.914	191.374	1.20426	0.26815	0.0730901	0.442453
ENSRNOG00000025518	15	34167945	34184799	+	Lrrc16b	protein_coding	437.6	387.412	0.885311	-0.175743	0.0732574	0.442966
ENSRNOG00000059683	10	89999917	90030639	-	Mpp2	protein_coding	1250.79	1151.35	0.920497	-0.119515	0.0732356	0.442966
ENSRNOG00000018602	5	168141547	168734296	-	Camta1	protein_coding	1253.45	1144.53	0.9131	-0.131155	0.0734519	0.443588
ENSRNOG00000001964	11	53514595	53575175	-	Cd47	protein_coding	979.203	892.699	0.911659	-0.133433	0.073421	0.443588
ENSRNOG00000031915	7	130102347	130107437	-	Hdac10	protein_coding	149.075	118.274	0.793383	-0.333911	0.073484	0.443588
ENSRNOG00000016013	1	188688743	188713280	-	Gprc5b	protein_coding	1234.49	1133.27	0.918006	-0.123424	0.0735609	0.443802
ENSRNOG00000009745	15	51896615	51967897	-	Ppp3cc	protein_coding	267.181	228.501	0.855232	-0.225613	0.0737886	0.444926
ENSRNOG00000016888	9	100450586	100479868	-	Pask	protein_coding	155.179	125.558	0.809116	-0.305581	0.0738611	0.445114
ENSRNOG00000046560	1	220836092	220836504	-	AC109096.1	pseudogene	444.186	500.827	1.12752	0.173149	0.0741894	0.445842
ENSRNOG00000002376	13	34400170	34582203	+	Clasp1	protein_coding	1063.06	968.16	0.910731	-0.134903	0.0741524	0.445842
ENSRNOG00000013000	4	176701983	176720012	-	Ldhb	protein_coding	4336.02	4604.84	1.062	0.0867779	0.0740591	0.445842
ENSRNOG00000001289	12	17277635	17380494	+	LOC498154	protein_coding	191.007	226.479	1.18571	0.24575	0.0741027	0.445842
ENSRNOG00000049975	5	154650632	154655132	+	Zfp46	protein_coding	444.427	394.121	0.886808	-0.173307	0.0741575	0.445842
ENSRNOG00000014486	1	245859633	246110218	-	Rfx3	protein_coding	185.199	220.986	1.19323	0.254878	0.0742911	0.446203
ENSRNOG00000019688	18	30972907	31071371	-	Diaph1	protein_coding	595.411	659.16	1.10707	0.146742	0.0747797	0.446622
ENSRNOG00000016343	1	176940693	176983045	-	Dkk3	protein_coding	5283.01	5609.56	1.06181	0.0865259	0.0746841	0.446622
ENSRNOG00000015221	1	173532803	173541847	+	Eif3f	protein_coding	1358.85	1472.49	1.08363	0.115873	0.074818	0.446622
ENSRNOG00000014031	18	1789900	1828606	-	Esco1	protein_coding	160.594	196.521	1.22372	0.291271	0.0744663	0.446622
ENSRNOG00000007034	4	66445266	66624912	-	Hipk2	protein_coding	524.805	463.072	0.882369	-0.180546	0.0744056	0.446622
ENSRNOG00000000648	20	22751743	22882672	-	Jmjd1c	protein_coding	1266.79	1152	0.909388	-0.137033	0.0747393	0.446622
ENSRNOG00000046002	9	10446699	10449566	+	LOC301124	protein_coding	673.985	742.827	1.10214	0.140309	0.0745808	0.446622
ENSRNOG00000014890	1	264755538	264756546	-	Mrpl43	protein_coding	260.639	301.593	1.15713	0.210551	0.0747313	0.446622
ENSRNOG00000014719	8	31497639	31534077	+	Snx19	protein_coding	833.059	757.134	0.90886	-0.13787	0.074763	0.446622
ENSRNOG00000048169	4	153774486	153791328	+	Tuba8	protein_coding	147.221	176.875	1.20142	0.264745	0.074584	0.446622
ENSRNOG00000008274	4	123134457	123161985	-	Xpc	protein_coding	249.162	211.38	0.848362	-0.237248	0.0745298	0.446622
ENSRNOG00000019254	1	85112247	85120839	+	Dyrk1b	protein_coding	320.733	277.123	0.864033	-0.210842	0.0750147	0.447547
ENSRNOG00000027694	5	169021530	169022178	-	LOC100362830	protein_coding	295.323	338.438	1.14599	0.196598	0.0751516	0.448116
ENSRNOG00000003291	13	83972212	83984675	+	Creg1	protein_coding	131.135	161.152	1.2289	0.297373	0.0754403	0.44863
ENSRNOG00000043300	5	58018039	58019836	-	Enho	protein_coding	384.537	446.645	1.16151	0.216007	0.0754217	0.44863
ENSRNOG00000027921	5	140107275	140162642	-	Rlf	protein_coding	389.982	440.102	1.12852	0.174429	0.0753618	0.44863
ENSRNOG00000004794	6	94951020	95061174	-	Rtn1	protein_coding	13272.8	12451.8	0.938146	-0.0921155	0.0753691	0.44863
ENSRNOG00000030308	7	117909961	117940007	-	Zfp251	protein_coding	477.468	424.95	0.890008	-0.16811	0.0754467	0.44863
ENSRNOG00000037162	14	82356916	82366368	+	Slbp	protein_coding	197.355	232.38	1.17747	0.235692	0.0755948	0.449262
ENSRNOG00000015055	9	85237458	85243001	-	Scg2	protein_coding	1609.02	1736.82	1.07943	0.110268	0.0756896	0.449328
ENSRNOG00000016952	7	12171185	12175835	+	Uqcr11	protein_coding	1706.34	1839.41	1.07799	0.108343	0.0756626	0.449328
ENSRNOG00000015480	5	172658748	172769421	-	Prkcz	protein_coding	2762.21	2954.49	1.06961	0.0970841	0.0757445	0.449406
ENSRNOG00000017020	9	94745217	94850771	+	Inpp5d	protein_coding	333.183	281.924	0.846151	-0.241013	0.0758082	0.449536
ENSRNOG00000052506	1	247144491	247169693	-	Ak3	protein_coding	343.491	390.101	1.1357	0.183578	0.0758577	0.449581
ENSRNOG00000049269	4	149800312	149802033	-	AABR07061860.2	pseudogene	226.976	264.817	1.16672	0.22246	0.0761523	0.449737
ENSRNOG00000001868	11	87778312	87815043	-	Crkl	protein_coding	124.695	151.573	1.21555	0.281608	0.0762574	0.449737
ENSRNOG00000001868	11	87778312	87815043	-	Crkl	protein_coding	124.695	151.573	1.21555	0.281608	0.0762574	0.449737
ENSRNOG00000013024	16	22979444	23074798	+	Csgalnact1	protein_coding	326.447	372.363	1.14065	0.189862	0.076121	0.449737
ENSRNOG00000008917	14	106871430	107160334	-	Ehbp1	protein_coding	950.402	867.417	0.912685	-0.131811	0.0763256	0.449737
ENSRNOG00000019482	19	11513201	11669578	-	Gnao1	protein_coding	4632.93	4344.86	0.937822	-0.0926144	0.0763387	0.449737
ENSRNOG00000012482	19	9766439	9801942	-	Ndrg4	protein_coding	21654	20341.1	0.939372	-0.090232	0.0760117	0.449737
ENSRNOG00000005130	14	86414949	86613327	+	Ogdh	protein_coding	2695.94	2492.39	0.924497	-0.113259	0.0761534	0.449737
ENSRNOG00000048190	1	57796709	57815038	-	Rgmb	protein_coding	402.472	353.979	0.879512	-0.185225	0.0762049	0.449737
ENSRNOG00000025909	20	5712203	5723902	-	Uqcc2	protein_coding	416.205	469.086	1.12705	0.172558	0.0763444	0.449737
ENSRNOG00000018967	19	43651148	43714418	-	Wdr59	protein_coding	324.192	282.705	0.87203	-0.19755	0.0761505	0.449737
ENSRNOG00000039234	12	19262977	19277910	+	Zscan21	protein_coding	163.876	196.099	1.19663	0.25898	0.0761492	0.449737
ENSRNOG00000025806	20	3299730	3307673	+	Prr3	protein_coding	463.424	411.39	0.887718	-0.171826	0.0764162	0.449914
ENSRNOG00000016831	1	164301010	164308317	-	Serpinh1	protein_coding	209.583	246.755	1.17736	0.235557	0.076521	0.450283
ENSRNOG00000001738	11	83908109	83926524	-	Eif4g1	protein_coding	1608.6	1486.42	0.924045	-0.113965	0.0766823	0.450986
ENSRNOG00000056955	12	46615649	46703287	+	Ccdc64	protein_coding	601.961	668.753	1.11096	0.151804	0.0767395	0.451076
ENSRNOG00000005890	4	98027554	98044566	+	Serbp1	protein_coding	1303.44	1411.23	1.0827	0.114629	0.0768329	0.451377
ENSRNOG00000037087	7	127081426	127081704	-	AC135400.1	protein_coding	52.4942	70.5117	1.34323	0.425704	0.0772204	0.451757
ENSRNOG00000056596	8	114927722	114940177	-	Alas1	protein_coding	462.472	410.351	0.887298	-0.17251	0.0773039	0.451757
ENSRNOG00000010888	2	84361061	84437084	-	Ankrd33b	protein_coding	293.253	338.247	1.15343	0.205927	0.0769585	0.451757
ENSRNOG00000019985	9	82647071	82668920	+	Asic4	protein_coding	109.288	134.291	1.22878	0.297223	0.0771848	0.451757
ENSRNOG00000020918	1	218090750	218100325	-	Ccnd1	protein_coding	152.673	185.264	1.21347	0.279141	0.0771096	0.451757
ENSRNOG00000011541	10	105618326	105628091	-	Cygb	protein_coding	445.849	500.17	1.12184	0.165862	0.0774109	0.451757
ENSRNOG00000031965	8	117347029	117351610	+	Impdh2	protein_coding	411.232	466.535	1.13448	0.182034	0.0771	0.451757
ENSRNOG00000019573	19	37913336	37916813	-	Lcat	protein_coding	61.3122	85.6156	1.39639	0.4817	0.077444	0.451757
ENSRNOG00000012428	19	48194804	48196748	-	Maf	protein_coding	70.2246	91.0609	1.29671	0.374855	0.0773342	0.451757
ENSRNOG00000014230	3	113251778	113272186	+	Map1a	protein_coding	15343.8	14331	0.933994	-0.0985155	0.0773846	0.451757
ENSRNOG00000024025	19	37852659	37866355	+	Nrn1l	protein_coding	958.316	873.442	0.911434	-0.133789	0.0771573	0.451757
ENSRNOG00000020481	1	82163595	82166363	-	Pafah1b3	protein_coding	91.0406	114.741	1.26032	0.333793	0.0774321	0.451757
ENSRNOG00000000833	20	3588497	3599514	+	Vars2	protein_coding	287.975	249.298	0.865694	-0.208071	0.0771841	0.451757
ENSRNOG00000009994	8	55062551	55087832	-	Dlat	protein_coding	950.448	869.418	0.914746	-0.128558	0.0776518	0.452723
ENSRNOG00000017523	5	166998881	167030441	-	H6pd	protein_coding	103.437	81.3206	0.786185	-0.347059	0.0778174	0.453263
ENSRNOG00000010635	10	86950557	86962578	+	Igfbp4	protein_coding	497.118	624.474	1.25619	0.329051	0.0778288	0.453263
ENSRNOG00000010981	3	7144250	7164654	-	Gtf3c5	protein_coding	265.121	227.421	0.857801	-0.221285	0.07808	0.453738
ENSRNOG00000018988	9	100932545	100952416	+	Ing5	protein_coding	205.83	242.335	1.17735	0.235546	0.0780805	0.453738
ENSRNOG00000020938	1	101511901	101514974	-	Ppp1r15a	protein_coding	173.76	208.632	1.20069	0.263869	0.0781215	0.453738
ENSRNOG00000010574	3	164665532	164711848	+	Ptpn1	protein_coding	267.918	308.887	1.15291	0.205285	0.0780044	0.453738
ENSRNOG00000025832	3	8662579	8690305	-	Zer1	protein_coding	3266.82	3039.98	0.930563	-0.103824	0.0781204	0.453738
ENSRNOG00000020848	1	84044551	84067066	+	Adck4	protein_coding	498.816	442.366	0.886833	-0.173266	0.078212	0.454018
ENSRNOG00000025970	9	84550603	84552964	+	AABR07068127.1	pseudogene	63.7342	84.4917	1.32569	0.406741	0.0782748	0.454137
ENSRNOG00000020713	1	216866245	216920625	-	Osbpl5	protein_coding	292.861	251.797	0.859781	-0.217958	0.078343	0.454288
ENSRNOG00000023309	5	62640645	62683964	-	Anks6	protein_coding	162.983	133.873	0.821392	-0.283857	0.0785839	0.454459
ENSRNOG00000021355	5	167226246	167244786	-	Car6	protein_coding	102.1	127.078	1.24464	0.315728	0.0785697	0.454459
ENSRNOG00000013674	18	52215682	52366238	+	Megf10	protein_coding	211.993	177.557	0.837559	-0.255738	0.0785585	0.454459
ENSRNOG00000013916	15	44855310	44860604	-	Nefm	protein_coding	1072.62	969.42	0.903788	-0.145943	0.0784963	0.454459
ENSRNOG00000020474	8	21669236	21680615	+	Pin1	protein_coding	1108.11	1201.4	1.08419	0.116623	0.0784664	0.454459
ENSRNOG00000001296	12	39353613	39396042	-	P2rx7	protein_coding	193.051	156.323	0.809752	-0.304448	0.0786486	0.454588
ENSRNOG00000016486	9	66495832	66519788	+	Nop58	protein_coding	330.694	378.978	1.14601	0.196619	0.0787292	0.454809
ENSRNOG00000000541	20	9273594	9291610	-	Glo1	protein_coding	944.54	1032.29	1.0929	0.12816	0.0788329	0.454919
ENSRNOG00000010176	8	69134223	69164758	-	Map2k1	protein_coding	3460.52	3694.74	1.06768	0.094486	0.0788059	0.454919
ENSRNOG00000009465	2	182723854	182731764	+	Sfrp2	protein_coding	79.0564	59.2306	0.74922	-0.416539	0.0789029	0.455079
ENSRNOG00000014330	1	1736276	1767618	-	Pcmt1	protein_coding	1558.61	1679.96	1.07785	0.10816	0.0791157	0.456061
ENSRNOG00000031536	3	145032200	145199356	+	Syndig1	protein_coding	435.064	385.422	0.885898	-0.174787	0.0792146	0.456387
ENSRNOG00000023086	8	81949877	81968589	+	LOC100360828	protein_coding	556.397	621.009	1.11612	0.158498	0.079386	0.456484
ENSRNOG00000023086	8	81949877	81968589	+	LOC100360828	protein_coding	556.397	621.009	1.11612	0.158498	0.079386	0.456484
ENSRNOG00000012258	1	178940516	179010257	-	Rras2	protein_coding	182.856	152.958	0.836491	-0.257577	0.0794864	0.456484
ENSRNOG00000006631	4	17272511	17594598	-	Sema3e	protein_coding	180.068	150.116	0.833663	-0.262463	0.079362	0.456484
ENSRNOG00000050282	1	198960542	199007347	+	Srcap	protein_coding	1503.45	1375.75	0.915061	-0.128061	0.0794733	0.456484
ENSRNOG00000013657	3	176808017	176816162	-	Stmn3	protein_coding	5088	5426.87	1.0666	0.0930225	0.0794477	0.456484
ENSRNOG00000043053	2	118910587	118916563	+	Zfp639	protein_coding	124.742	99.7176	0.799393	-0.323024	0.0794606	0.456484
ENSRNOG00000001082	12	37923528	37958363	+	Abcb9	protein_coding	487.415	435.263	0.893003	-0.163263	0.0799807	0.456628
ENSRNOG00000046254	9	9431860	9585865	-	Adgre1	protein_coding	75.6466	98.1254	1.29716	0.375352	0.0795678	0.456628
ENSRNOG00000017673	1	72701610	72727112	-	Brsk1	protein_coding	5416.14	5729.36	1.05783	0.0811098	0.0797631	0.456628
ENSRNOG00000014479	2	207495055	207541645	-	Cttnbp2nl	protein_coding	328.453	373.409	1.13687	0.185068	0.0796447	0.456628
ENSRNOG00000027264	1	226297016	226353611	-	Dagla	protein_coding	1311.65	1201.15	0.915755	-0.126966	0.0800129	0.456628
ENSRNOG00000002413	X	139354155	139464798	-	Gpc4	protein_coding	299.14	257.938	0.862264	-0.213799	0.0799398	0.456628
ENSRNOG00000020843	1	101448346	101449829	-	LOC100360087	protein_coding	738.265	815.091	1.10406	0.142822	0.0800998	0.456628
ENSRNOG00000017069	1	80335526	80367328	-	Mark4	protein_coding	983.781	895.74	0.910508	-0.135257	0.0800078	0.456628
ENSRNOG00000001120	12	43421308	43576804	-	Med13l	protein_coding	1293.28	1183.39	0.915028	-0.128112	0.0799997	0.456628
ENSRNOG00000016950	17	86408151	86409518	+	Otud1	protein_coding	167.702	200.149	1.19348	0.255169	0.0801064	0.456628
ENSRNOG00000015550	3	2686123	2689084	-	Ptgds	protein_coding	843.719	1279.21	1.51616	0.600424	0.0799845	0.456628
ENSRNOG00000008482	3	46803355	47025128	-	Rbms1	protein_coding	125.683	101.372	0.806572	-0.310125	0.0800996	0.456628
ENSRNOG00000016254	9	43129415	43139870	-	Sema4c	protein_coding	244.888	207.939	0.849119	-0.235961	0.0797229	0.456628
ENSRNOG00000004908	6	36941233	36995138	+	Smc6	protein_coding	552.987	614.222	1.11074	0.151515	0.0800461	0.456628
ENSRNOG00000018289	5	167982439	168004724	-	Park7	protein_coding	1170.4	1281.03	1.09452	0.130298	0.0801799	0.456804
ENSRNOG00000029528	20	10361988	10386751	-	Cbs	protein_coding	544.66	609.804	1.1196	0.162989	0.0804197	0.457712
ENSRNOG00000002821	13	26172243	26394505	+	Phlpp1	protein_coding	1102.23	1007.26	0.913832	-0.129999	0.0804243	0.457712
ENSRNOG00000038328	10	45526745	45534570	-	Gjc2	protein_coding	201.396	135.714	0.673865	-0.569468	0.0805897	0.457963
ENSRNOG00000012404	1	162381253	162385575	-	Thrsp	protein_coding	126.942	155.686	1.22644	0.294472	0.0805185	0.457963
ENSRNOG00000009076	3	159995064	160013274	+	Ttpal	protein_coding	583.25	648.978	1.11269	0.154055	0.0805964	0.457963
ENSRNOG00000043436	20	29284853	29432258	+	Micu1	protein_coding	1642.09	1799.5	1.09586	0.132063	0.0807842	0.458788
ENSRNOG00000026328	15	19547871	19614805	+	Gpr137c	protein_coding	83.2604	105.422	1.26617	0.340468	0.0808593	0.458972
ENSRNOG00000010580	5	169357517	169450219	+	Acot7	protein_coding	2633.9	2425.67	0.920942	-0.118818	0.0814312	0.459713
ENSRNOG00000047456	9	11098924	11108741	-	Ccdc94	protein_coding	194.043	228.16	1.17582	0.23367	0.0814635	0.459713
ENSRNOG00000025025	2	225854629	225866357	+	Dnttip2	protein_coding	185.384	218.226	1.17715	0.235303	0.0811716	0.459713
ENSRNOG00000018950	19	43545378	43596801	-	Fa2h	protein_coding	178.837	116.14	0.64942	-0.622777	0.0814556	0.459713
ENSRNOG00000004874	3	134683065	134696654	-	Flrt3	protein_coding	220.335	260.792	1.18362	0.243203	0.0810527	0.459713
ENSRNOG00000013009	1	102900286	102909707	+	Ldha	protein_coding	5481.86	5823.4	1.06231	0.0871982	0.0813838	0.459713
ENSRNOG00000033891	20	33174892	33182294	+	LOC100361475	protein_coding	53.9026	71.6122	1.32855	0.409849	0.0814913	0.459713
ENSRNOG00000006796	10	74768759	74769637	-	LOC102555183	protein_coding	203.098	238.348	1.17356	0.230895	0.0815766	0.459713
ENSRNOG00000006796	10	74768759	74769637	-	LOC102555183	protein_coding	203.098	238.348	1.17356	0.230895	0.0815766	0.459713
ENSRNOG00000006970	10	13577725	13580821	-	Ntn3	protein_coding	152.031	125.331	0.824378	-0.278622	0.0811226	0.459713
ENSRNOG00000004978	2	252605307	252691886	-	Prkacb	protein_coding	2443	2620.4	1.07262	0.101132	0.0813307	0.459713
ENSRNOG00000004820	10	37215937	37245658	+	Sar1b	protein_coding	358.063	406.522	1.13534	0.183121	0.0815843	0.459713
ENSRNOG00000012604	8	22966561	22969459	+	Swsap1	protein_coding	146.349	175.516	1.1993	0.262187	0.081589	0.459713
ENSRNOG00000016890	19	37424324	37427989	-	Tppp3	protein_coding	261.557	189.683	0.725209	-0.463531	0.0815642	0.459713
ENSRNOG00000022414	9	81844138	81868086	-	Zfp142	protein_coding	725.663	654.203	0.901523	-0.149563	0.0813706	0.459713
ENSRNOG00000028366	6	101532518	101859164	+	Gphn	protein_coding	657.37	592.284	0.900991	-0.150415	0.0820632	0.460694
ENSRNOG00000030880	X	138677580	138972684	-	Hs6st2	protein_coding	199.516	168.694	0.845515	-0.242098	0.082027	0.460694
ENSRNOG00000001115	12	13914114	13924531	-	Slc29a4	protein_coding	107.886	85.1723	0.789462	-0.341058	0.0818199	0.460694
ENSRNOG00000002956	14	59198401	59323947	-	Stim2	protein_coding	462.317	515.576	1.1152	0.157303	0.0819462	0.460694
ENSRNOG00000014666	9	15207822	15214596	-	Tfeb	protein_coding	74.5471	55.9994	0.751194	-0.412742	0.0820274	0.460694
ENSRNOG00000037505	12	51908448	51934702	+	Ulk1	protein_coding	965.21	883.824	0.91568	-0.127084	0.0820157	0.460694
ENSRNOG00000024967	7	71264514	71269869	-	Uqcrb	protein_coding	572.768	636.917	1.112	0.153155	0.0818885	0.460694
ENSRNOG00000018123	17	62332537	62462644	-	Ccny	protein_coding	710.321	782.55	1.10168	0.139711	0.0821164	0.460752
ENSRNOG00000000902	12	6322668	6341902	-	Hsph1	protein_coding	3458.14	3691.83	1.06758	0.0943408	0.0825279	0.462105
ENSRNOG00000019322	3	3905453	3951025	-	Notch1	protein_coding	363.178	316.49	0.871444	-0.19852	0.0824662	0.462105
ENSRNOG00000051356	X	73424922	73552587	+	Rn50_X_0744.3	lincRNA	313.484	273.423	0.872207	-0.197258	0.0824289	0.462105
ENSRNOG00000000786	20	2515520	2517498	+	Rpp21	protein_coding	104.168	128.29	1.23156	0.300491	0.0825725	0.462105
ENSRNOG00000019349	7	11777826	11783849	-	Sf3a2	protein_coding	246.04	207.619	0.843844	-0.244952	0.0825302	0.462105
ENSRNOG00000005018	3	51687809	51822250	+	Scn2a	protein_coding	6619.19	6196.17	0.936092	-0.0952784	0.0827601	0.462914
ENSRNOG00000001488	1	57470632	57489727	-	Psmb1	protein_coding	1249.47	1354.59	1.08413	0.116542	0.0828564	0.463211
ENSRNOG00000005279	6	1534594	1545828	+	Ndufaf7	protein_coding	344.085	389.809	1.13289	0.180005	0.0829047	0.463241
ENSRNOG00000020497	1	201429771	201480877	+	Plekha1	protein_coding	795.468	726.039	0.91272	-0.131756	0.0829594	0.463305
ENSRNOG00000032039	18	77343551	77535593	-	Atp9b	protein_coding	659.294	597.767	0.906677	-0.141339	0.0832137	0.464243
ENSRNOG00000008305	8	46525400	46537050	-	Sc5d	protein_coding	1525.32	1641.29	1.07603	0.105717	0.0831842	0.464243
ENSRNOG00000061118	2	183807073	183811118	-	AABR07012047.1	lincRNA	182.782	152.104	0.832157	-0.265073	0.0834051	0.464587
ENSRNOG00000022372	5	154909003	154965171	-	Kdm1a	protein_coding	790.525	719.831	0.910574	-0.135153	0.0833772	0.464587
ENSRNOG00000028668	3	114355798	114647382	+	LOC691960	protein_coding	128.388	102.396	0.797552	-0.326349	0.0833698	0.464587
ENSRNOG00000002092	11	30550141	30663465	+	Hunk	protein_coding	127.045	101.313	0.797458	-0.32652	0.0834925	0.464833
ENSRNOG00000056337	2	189615948	189626051	+	Crtc2	protein_coding	286.005	246.753	0.862757	-0.212973	0.0840085	0.465294
ENSRNOG00000000596	20	44436403	44630317	+	Fyn	protein_coding	1093.82	997.265	0.911724	-0.133332	0.0837977	0.465294
ENSRNOG00000014522	19	52032886	52048753	+	Mlycd	protein_coding	247.829	212.331	0.856762	-0.223033	0.0839782	0.465294
ENSRNOG00000018417	17	5411506	5463898	-	Naa35	protein_coding	465.065	519.431	1.1169	0.159499	0.0839143	0.465294
ENSRNOG00000018584	9	93545396	93549436	+	Ptma	protein_coding	1349.57	1460.88	1.08248	0.114336	0.0839656	0.465294
[truncated: 31,719 more rows]
