# Supplementary material
Source: HighWire-hosted journal article supplement (https://www.jneurosci.org/content/41/12/2601)
Supplement: inline-supplementary-material-24 [file inline-supplementary-material-24.xlsx]

## Sheet: Figure 8-6
Figure 8-6: List of synaptic function-related DEGs in the PL cortex at 1 hour after inhibitory avoidance training
Ontology: Synaptic gene ontology (SynGO)
Curator: syngoportal.org
Function: Overrepresentation analysis
Background: brain expressed genes
Full list of DEGs related to synaptic function highlighted in red; full SynGO results below
GO term ID	GO domain	GO term name	GO term name - hierarchical structure	GO parent term ID	p-value	FDR	genes - hgnc_symbol
GO:0045202	CC	synapse	synapse		5.51937e-31	1.15907e-29	AGRN | RPSA | RPS3A | RPL17 | RPL5 | UBA52 | RPS15 | RPS7 | RPL3 | RPL18A | RPLP0 | RPL11 | RPL24 | RPS2 | RPL10 | RPL9 | RPS17 | NCAN | RPS23 | SPARC | PCDH8 | MADD | RPL13A | RPL14 | RPL21 | RPL26 | RPL27A | RPL32 | RPL35 | RPL37A | RPL34 | RPS11 | RPS14 | RPS15A | RPS16 | RPS27A | RPS28 | RPS5 | DPYSL2 | CADPS2 | CPLX2 | SEPT5 | DGKQ | NSF | CALB1 | CAMK2A | APP | RIMBP2 | CACNA1A | CACNA1H | …
GO:0097060	CC	synaptic membrane	├─ synaptic membrane	GO:0045202
GO:0099243	CC	extrinsic component of synaptic membrane	│ ├─ extrinsic component of synaptic membrane	GO:0097060
GO:0099699	CC	integral component of synaptic membrane	│ └─ integral component of synaptic membrane	GO:0097060
GO:0098793	CC	presynapse	├─ presynapse	GO:0045202	1.14711e-22	6.02233e-22	DPYSL2 | CADPS2 | CPLX2 | SEPT5 | DGKQ | NSF | CALB1 | CAMK2A | APP | RIMBP2 | CACNA1A | CACNA1H | GRIN1 | GRM8 | ATP6V0A1 | ATP6V1F | RAB3B | SYN1 | RPH3A | SCAMP5 | TMEM163 | SLC6A9 | PTPRN2 | SV2A | WFS1 | PLAT | KCNA2 | CACNA1B | ATP1A3 | CNTNAP4 | PTPRS | PCDH17 | GRIK1 | CHRNA4 | NCAM1 | PTPRD | CHRM4 | RPL9 | RPL10 | RPL11 | RPL13A | RPL14 | RPL17 | RPL26 | RPL24 | RPL27A | RPL32 | RPL34 |…
GO:0099523	CC	presynaptic cytosol	│ ├─ presynaptic cytosol	GO:0098793	0.0414734	0.0435471	NSF | CALB1 | CAMK2A
GO:0099569	CC	presynaptic cytoskeleton	│ ├─ presynaptic cytoskeleton	GO:0098793
GO:0099182	CC	presynaptic intermediate filament cytoskeleton	│ │ ├─ presynaptic intermediate filament cytoskeleton	GO:0099569
GO:0099143	CC	presynaptic actin cytoskeleton	│ │ └─ presynaptic actin cytoskeleton	GO:0099569
GO:0048786	CC	presynaptic active zone	│ ├─ presynaptic active zone	GO:0098793	0.0333281	0.0388828	APP | RIMBP2 | CACNA1A | CACNA1H | GRIN1 | GRM8
GO:0098831	CC	presynaptic active zone cytoplasmic component	│ │ ├─ presynaptic active zone cytoplasmic component	GO:0048786			RIMBP2
GO:0048787	CC	presynaptic active zone membrane	│ │ └─ presynaptic active zone membrane	GO:0048786	0.0691448		CACNA1A | CACNA1H | GRIN1 | GRM8
GO:0099029	CC	anchored component of presynaptic active zone membrane	│ │ ├─ anchored component of presynaptic active zone membrane	GO:0048787
GO:0098891	CC	extrinsic component of presynaptic active zone membrane	│ │ ├─ extrinsic component of presynaptic active zone membrane	GO:0048787
GO:0099059	CC	integral component of presynaptic active zone membrane	│ │ └─ integral component of presynaptic active zone membrane	GO:0048787	0.0373239	0.0412527	CACNA1A | CACNA1H | GRIN1 | GRM8
GO:0098833	CC	presynaptic endocytic zone	│ ├─ presynaptic endocytic zone	GO:0098793
GO:0098835	CC	presynaptic endocytic zone membrane	│ │ └─ presynaptic endocytic zone membrane	GO:0098833
GO:0098894	CC	extrinsic component of presynaptic endocytic zone membrane	│ │ └─ extrinsic component of presynaptic endocytic zone membrane	GO:0098835
GO:0098830	CC	presynaptic endosome	│ ├─ presynaptic endosome	GO:0098793
GO:0098954	CC	presynaptic endosome membrane	│ │ └─ presynaptic endosome membrane	GO:0098830
GO:0099067	CC	integral component of presynaptic endosome membrane	│ │ └─ integral component of presynaptic endosome membrane	GO:0098954
GO:0008021	CC	synaptic vesicle	│ ├─ synaptic vesicle	GO:0098793	0.000280107	0.000588225	ATP6V0A1 | ATP6V1F | RAB3B | SYN1 | RPH3A | SCAMP5 | TMEM163 | SLC6A9 | PTPRN2 | SV2A | WFS1
GO:0034592	CC	synaptic vesicle lumen	│ │ ├─ synaptic vesicle lumen	GO:0008021
GO:0030672	CC	synaptic vesicle membrane	│ │ └─ synaptic vesicle membrane	GO:0008021	0.000568933	0.00108615	RAB3B | SYN1 | RPH3A | SCAMP5 | TMEM163 | SLC6A9 | PTPRN2 | SV2A | WFS1
GO:0098993	CC	anchored component of synaptic vesicle membrane	│ │ ├─ anchored component of synaptic vesicle membrane	GO:0030672			RAB3B
GO:0098850	CC	extrinsic component of synaptic vesicle membrane	│ │ ├─ extrinsic component of synaptic vesicle membrane	GO:0030672			SYN1 | RPH3A
GO:0030285	CC	integral component of synaptic vesicle membrane	│ │ └─ integral component of synaptic vesicle membrane	GO:0030672	0.00174289	0.00305006	SCAMP5 | TMEM163 | SLC6A9 | PTPRN2 | SV2A | WFS1
GO:0098992	CC	neuronal dense core vesicle	│ ├─ neuronal dense core vesicle	GO:0098793			PLAT
GO:0099013	CC	neuronal dense core vesicle lumen	│ │ ├─ neuronal dense core vesicle lumen	GO:0098992
GO:0099012	CC	neuronal dense core vesicle membrane	│ │ └─ neuronal dense core vesicle membrane	GO:0098992
GO:0098674	CC	extrinsic component of neuronal dense core vesicle membrane	│ │ ├─ extrinsic component of neuronal dense core vesicle membrane	GO:0099012
GO:0099066	CC	integral component of neuronal dense core vesicle membrane	│ │ └─ integral component of neuronal dense core vesicle membrane	GO:0099012
GO:0042734	CC	presynaptic membrane	│ ├─ presynaptic membrane	GO:0098793	7.02155e-05		KCNA2 | CACNA1B | ATP1A3 | CNTNAP4 | PTPRS | SLC6A9 | PCDH17 | GRIK1 | GRIN1 | CHRNA4 | NCAM1 | PTPRD | CHRM4
GO:0099026	CC	anchored component of presynaptic membrane	│ │ ├─ anchored component of presynaptic membrane	GO:0042734
GO:0098888	CC	extrinsic component of presynaptic membrane	│ │ ├─ extrinsic component of presynaptic membrane	GO:0042734
GO:0099056	CC	integral component of presynaptic membrane	│ │ └─ integral component of presynaptic membrane	GO:0042734	2.31622e-05	6.08007e-05	KCNA2 | CACNA1B | ATP1A3 | CNTNAP4 | PTPRS | SLC6A9 | PCDH17 | GRIK1 | GRIN1 | CHRNA4 | NCAM1 | PTPRD | CHRM4
SYNGO:presyn_ribosome	CC	presynaptic ribosome	│ ├─ presynaptic ribosome	GO:0098793	4.73697e-20	1.98953e-19	RPL9 | RPL10 | RPL11 | RPL13A | RPL14 | RPL17 | RPL26 | RPL24 | RPL27A | RPL32 | RPL34 | RPL35 | RPL37A | RPL4 | RPL5 | RPLP0 | UBA52 | RPS11 | RPS14 | RPS15A | RPS16 | RPS27A | RPS28 | RPS5
SYNGO:presyn_er	CC	presynaptic ER	│ └─ presynaptic ER	GO:0098793
SYNGO:presyn_er_membrane	CC	presynaptic ER membrane	│ ├─ presynaptic ER membrane	SYNGO:presyn_er
SYNGO:presyn_er_membrane_integral	CC	integral component of presynaptic ER membrane	│ │ └─ integral component of presynaptic ER membrane	SYNGO:presyn_er_membrane
SYNGO:presyn_ser	CC	presynaptic SER	│ └─ presynaptic SER	SYNGO:presyn_er
SYNGO:presyn_ser_membrane	CC	presynaptic SER membrane	│ └─ presynaptic SER membrane	SYNGO:presyn_ser
SYNGO:presyn_ser_membrane_integral	CC	integral component of presynaptic SER membrane	│ └─ integral component of presynaptic SER membrane	SYNGO:presyn_ser_membrane
GO:0043083	CC	synaptic cleft	├─ synaptic cleft	GO:0045202	0.0121842	0.0170579	APOE | NPTX1 | AGRN
GO:0098965	CC	extracellular matrix of synaptic cleft	│ └─ extracellular matrix of synaptic cleft	GO:0043083			AGRN
GO:0098794	CC	postsynapse	├─ postsynapse	GO:0045202	6.01613e-25	4.21129e-24	CPLX2 | ATP1A3 | NSMF | RPLP0 | CALB1 | DGKQ | PLAT | DNAJB1 | DOCK10 | HIP1R | KLHL17 | AGAP2 | ARHGEF2 | HOMER1 | CAMK2A | CLSTN1 | CHRNA4 | GRASP | PPP1R9B | SLC6A9 | RPL5 | RPL18A | RPL14 | RPS14 | RPL4 | DROSHA | PSD | TANC2 | ARC | RNF10 | ADRA2C | GRIN1 | DCC | CHRM4 | CLSTN3 | CNTN2 | TENM2 | FARP1 | KCNA2 | CACNA1H | SLC6A8 | PCDH17 | PCDH8 | NCAM1 | RPL10 | RPL11 | RPL13A | RPL17 | RPL2…
GO:0099524	CC	postsynaptic cytosol	│ ├─ postsynaptic cytosol	GO:0098794	0.0286327	0.0353698	HOMER1 | CALB1 | CAMK2A
GO:0099571	CC	postsynaptic cytoskeleton	│ ├─ postsynaptic cytoskeleton	GO:0098794
GO:0099160	CC	postsynaptic intermediate filament cytoskeleton	│ │ ├─ postsynaptic intermediate filament cytoskeleton	GO:0099571
GO:0098871	CC	postsynaptic actin cytoskeleton	│ │ ├─ postsynaptic actin cytoskeleton	GO:0099571
GO:0150050	CC	postsynaptic septin cytoskeleton	│ │ ├─ postsynaptic septin cytoskeleton	GO:0099571
GO:0099189	CC	postsynaptic spectrin-associated cytoskeleton	│ │ └─ postsynaptic spectrin-associated cytoskeleton	GO:0099571
GO:0097444	CC	spine apparatus	│ ├─ spine apparatus	GO:0098794			CLSTN1
GO:0098897	CC	spine apparatus membrane	│ │ └─ spine apparatus membrane	GO:0097444			CLSTN1
GO:0099065	CC	integral component of spine apparatus membrane	│ │ └─ integral component of spine apparatus membrane	GO:0098897			CLSTN1
GO:0150051	CC	postsynaptic Golgi apparatus	│ ├─ postsynaptic Golgi apparatus	GO:0098794
GO:0099572	CC	postsynaptic specialization	│ ├─ postsynaptic specialization	GO:0098794	1.29809e-06	3.89426e-06	CHRNA4 | HOMER1 | GRASP | CAMK2A | PPP1R9B | SLC6A9 | RPL5 | RPL18A | RPLP0 | RPL14 | RPS14 | RPL4 | DNAJB1 | DROSHA | ARHGEF2 | PSD | TANC2 | ARC | RNF10 | ADRA2C | GRIN1 | DCC | CHRM4 | CLSTN3 | CLSTN1
GO:0099091	CC	postsynaptic specialization, intracellular component	│ │ ├─ postsynaptic specialization, intracellular component	GO:0099572
GO:0099634	CC	postsynaptic specialization membrane	│ │ ├─ postsynaptic specialization membrane	GO:0099572			CHRNA4
GO:0098892	CC	extrinsic component of postsynaptic specialization membrane	│ │ │ ├─ extrinsic component of postsynaptic specialization membrane	GO:0099634
GO:0099060	CC	integral component of postsynaptic specialization membrane	│ │ │ └─ integral component of postsynaptic specialization membrane	GO:0099634			CHRNA4
GO:0014069	CC	postsynaptic density	│ │ ├─ postsynaptic density	GO:0099572	1.25806e-07	4.4032e-07	HOMER1 | GRASP | CAMK2A | PPP1R9B | SLC6A9 | RPL5 | RPL18A | RPLP0 | RPL14 | RPS14 | RPL4 | DNAJB1 | DROSHA | ARHGEF2 | PSD | TANC2 | ARC | RNF10 | ADRA2C | GRIN1 | DCC | CHRM4 | CLSTN3 | CLSTN1
GO:0099092	CC	postsynaptic density, intracellular component	│ │ │ ├─ postsynaptic density, intracellular component	GO:0014069	0.0887631	0.0887631	ARHGEF2 | PSD | TANC2
GO:0098839	CC	postsynaptic density membrane	│ │ │ └─ postsynaptic density membrane	GO:0014069	0.00729457	0.0109419	ARC | RNF10 | ADRA2C | GRIN1 | DCC | CHRM4 | CLSTN3 | CLSTN1
GO:0099031	CC	anchored component of postsynaptic density membrane	│ │ │ ├─ anchored component of postsynaptic density membrane	GO:0098839
GO:0099147	CC	extrinsic component of postsynaptic density membrane	│ │ │ ├─ extrinsic component of postsynaptic density membrane	GO:0098839			RNF10
GO:0099061	CC	integral component of postsynaptic density membrane	│ │ │ └─ integral component of postsynaptic density membrane	GO:0098839	0.026337	0.0345674	ADRA2C | GRIN1 | DCC | CHRM4 | CLSTN3 | CLSTN1
GO:0099629	CC	postsynaptic specialization of symmetric synapse	│ │ └─ postsynaptic specialization of symmetric synapse	GO:0099572
GO:0098843	CC	postsynaptic endocytic zone	│ ├─ postsynaptic endocytic zone	GO:0098794
GO:0098844	CC	postsynaptic endocytic zone membrane	│ │ └─ postsynaptic endocytic zone membrane	GO:0098843
GO:0098845	CC	postsynaptic endosome	│ ├─ postsynaptic endosome	GO:0098794			CLSTN1 | ARC
GO:0098895	CC	postsynaptic endosome membrane	│ │ ├─ postsynaptic endosome membrane	GO:0098845
GO:0098999	CC	extrinsic component of postsynaptic endosome membrane	│ │ │ └─ extrinsic component of postsynaptic endosome membrane	GO:0098895
GO:0098842	CC	postsynaptic early endosome	│ │ ├─ postsynaptic early endosome	GO:0098845
GO:0098896	CC	postsynaptic early endosome membrane	│ │ │ └─ postsynaptic early endosome membrane	GO:0098842
GO:0098998	CC	extrinsic component of postsynaptic early endosome membrane	│ │ │ └─ extrinsic component of postsynaptic early endosome membrane	GO:0098896
GO:0098837	CC	postsynaptic recycling endosome	│ │ └─ postsynaptic recycling endosome	GO:0098845
GO:0098944	CC	postsynaptic recycling endosome membrane	│ │ └─ postsynaptic recycling endosome membrane	GO:0098837
GO:0099033	CC	anchored component of postsynaptic recycling endosome membrane	│ │ └─ anchored component of postsynaptic recycling endosome membrane	GO:0098944
GO:0045211	CC	postsynaptic membrane	│ ├─ postsynaptic membrane	GO:0098794	0.000260357	0.000588225	CNTN2 | TENM2 | FARP1 | KCNA2 | CACNA1H | SLC6A9 | SLC6A8 | ADRA2C | PCDH17 | PCDH8 | NCAM1
GO:0099025	CC	anchored component of postsynaptic membrane	│ │ ├─ anchored component of postsynaptic membrane	GO:0045211			CNTN2
GO:0098890	CC	extrinsic component of postsynaptic membrane	│ │ ├─ extrinsic component of postsynaptic membrane	GO:0045211			TENM2 | FARP1
GO:0099055	CC	integral component of postsynaptic membrane	│ │ └─ integral component of postsynaptic membrane	GO:0045211	0.00463314	0.00748431	KCNA2 | CACNA1H | SLC6A9 | SLC6A8 | ADRA2C | PCDH17 | PCDH8 | NCAM1
SYNGO:postsyn_ribosome	CC	postsynaptic ribosome	│ ├─ postsynaptic ribosome	GO:0098794	3.13987e-26	3.29686e-25	RPL10 | RPL11 | RPL13A | RPL14 | RPL17 | RPL21 | RPL26 | RPL24 | RPL27A | RPL32 | RPL34 | RPL35 | RPL37A | RPL4 | RPL5 | RPLP0 | UBA52 | RPS11 | RPS14 | RPS15A | RPS16 | RPS27A | RPS28 | RPS5 | RPS15 | RPS17 | RPS2 | RPS23 | RPS3A | RPS7 | RPSA | RPL9
SYNGO:postsyn_er	CC	postsynaptic ER	│ └─ postsynaptic ER	GO:0098794
SYNGO:postsyn_er_membrane	CC	postsynaptic ER membrane	│ ├─ postsynaptic ER membrane	SYNGO:postsyn_er
SYNGO:postsyn_er_membrane_integral	CC	integral component of postsynaptic ER membrane	│ │ └─ integral component of postsynaptic ER membrane	SYNGO:postsyn_er_membrane
SYNGO:postsyn_ser	CC	postsynaptic SER	│ └─ postsynaptic SER	SYNGO:postsyn_er
SYNGO:postsyn_ser_membrane	CC	postsynaptic SER membrane	│ └─ postsynaptic SER membrane	SYNGO:postsyn_ser
SYNGO:postsyn_ser_membrane_integral	CC	integral component of postsynaptic SER membrane	│ └─ integral component of postsynaptic SER membrane	SYNGO:postsyn_ser_membrane
GO:0099544	CC	extrasynaptic space	└─ extrasynaptic space	GO:0045202			PLAT
GO:0098966	CC	perisynaptic extracellular matrix	└─ perisynaptic extracellular matrix	GO:0099544
SYNGO:synprocess	BP	process in the synapse	process in the synapse		2.9438e-24	9.12577e-23	CALB1 | CACNA1A | RIMBP2 | CACNA1B | GRIK1 | GRIK3 | GRIN1 | KCNA2 | NSF | SYN1 | RAB3B | CAMK2A | SEPT5 | CPLX2 | SV2A | CADPS2 | RPH3A | TMEM163 | ATP6V1F | ATP6V0A1 | SCAMP5 | DGKQ | SLC6A9 | CHRNA4 | HOMER1 | NPTX1 | ARC | PTPRD | TENM2 | TENM3 | FARP1 | PLAT | BDNF | PCDH8 | L1CAM | NCAM1 | PTPRS | NCAN | CNTNAP4 | GRM8 | DCC | HIP1R | AGRN | SPARC | APOE | PCDH17 | APP | CLSTN3 | PSD | CLST…
SYNGO:presynprocess	BP	process in the presynapse	├─ process in the presynapse	SYNGO:synprocess	3.51571e-07	2.17974e-06	CALB1 | CACNA1A | RIMBP2 | CACNA1B | GRIK1 | GRIK3 | GRIN1 | KCNA2 | NSF | SYN1 | RAB3B | CAMK2A | SEPT5 | CPLX2 | SV2A | CADPS2 | RPH3A | TMEM163 | ATP6V1F | ATP6V0A1 | SCAMP5 | DGKQ | SLC6A9
GO:0099509	BP	regulation of presynaptic cytosolic calcium levels	│ ├─ regulation of presynaptic cytosolic calcium levels	SYNGO:presynprocess	0.00890314	0.0153332	CALB1 | CACNA1A | RIMBP2 | CACNA1B
GO:1905056	BP	ATPase-coupled calcium ion transmembrane transporter activity involved in regulation of presynaptic cytosolic calcium levels	│ │ ├─ ATPase-coupled calcium ion transmembrane transporter activity involved in regulation of presynaptic cytosolic calcium levels	GO:0099509
GO:0099534	BP	calcium ion binding involved in regulation of presynaptic cytosolic calcium levels	│ │ ├─ calcium ion binding involved in regulation of presynaptic cytosolic calcium levels	GO:0099509			CALB1
GO:0099626	BP	voltage-gated calcium channel activity involved in regulation of presynaptic cytosolic calcium levels	│ │ └─ voltage-gated calcium channel activity involved in regulation of presynaptic cytosolic calcium levels	GO:0099509	0.00316263	0.00653609	CACNA1A | RIMBP2 | CACNA1B
GO:0099635	BP	voltage-gated calcium channel activity involved in positive regulation of presynaptic cytosolic calcium levels	│ │ └─ voltage-gated calcium channel activity involved in positive regulation of presynaptic cytosolic calcium levels	GO:0099626			CACNA1B
GO:0099505	BP	regulation of presynaptic membrane potential	│ ├─ regulation of presynaptic membrane potential	SYNGO:presynprocess	0.0284201	0.0355045	GRIK1 | GRIK3 | GRIN1 | KCNA2
GO:0099507	BP	ligand-gated ion channel activity involved in regulation of presynaptic membrane potential	│ │ ├─ ligand-gated ion channel activity involved in regulation of presynaptic membrane potential	GO:0099505	0.0286327	0.0355045	GRIK1 | GRIK3 | GRIN1
GO:0099508	BP	voltage-gated ion channel activity involved in regulation of presynaptic membrane potential	│ │ ├─ voltage-gated ion channel activity involved in regulation of presynaptic membrane potential	GO:0099505			KCNA2
GO:0150047	BP	G-protein coupled neurotransmitter receptor activity involved in regulation of presynaptic membrane potential	│ │ └─ G-protein coupled neurotransmitter receptor activity involved in regulation of presynaptic membrane potential	GO:0099505
GO:0099504	BP	synaptic vesicle cycle	│ ├─ synaptic vesicle cycle	SYNGO:presynprocess	2.9269e-05	0.00012962	NSF | SYN1 | RAB3B | RIMBP2 | CACNA1B | CAMK2A | SEPT5 | CPLX2 | SV2A | CADPS2 | RPH3A | TMEM163 | ATP6V1F | ATP6V0A1 | SCAMP5 | DGKQ
GO:0098693	BP	regulation of synaptic vesicle cycle	│ │ ├─ regulation of synaptic vesicle cycle	GO:0099504			SYN1 | RAB3B
GO:0097091	BP	synaptic vesicle clustering	│ │ ├─ synaptic vesicle clustering	GO:0099504
GO:0099532	BP	synaptic vesicle endosomal processing	│ │ ├─ synaptic vesicle endosomal processing	GO:0099504
GO:0016182	BP	synaptic vesicle budding from endosome	│ │ │ ├─ synaptic vesicle budding from endosome	GO:0099532
GO:0016189	BP	synaptic vesicle to endosome fusion	│ │ │ └─ synaptic vesicle to endosome fusion	GO:0099532
GO:0016079	BP	synaptic vesicle exocytosis	│ │ ├─ synaptic vesicle exocytosis	GO:0099504	0.000823726	0.00255355	RIMBP2 | CACNA1B | CAMK2A | SEPT5 | CPLX2 | SV2A | CADPS2 | RPH3A
GO:0099502	BP	calcium-dependent activation of synaptic vesicle fusion	│ │ │ ├─ calcium-dependent activation of synaptic vesicle fusion	GO:0016079			RIMBP2 | CACNA1B
GO:0150037	BP	regulation of calcium-dependent activation of synaptic vesicle fusion	│ │ │ │ └─ regulation of calcium-dependent activation of synaptic vesicle fusion	GO:0099502			RIMBP2 | CACNA1B
GO:2000300	BP	regulation of synaptic vesicle exocytosis	│ │ │ ├─ regulation of synaptic vesicle exocytosis	GO:0016079
GO:0016081	BP	synaptic vesicle docking	│ │ │ ├─ synaptic vesicle docking	GO:0016079			CAMK2A | SEPT5
GO:0099148	BP	regulation of synaptic vesicle docking	│ │ │ │ └─ regulation of synaptic vesicle docking	GO:0016081			CAMK2A | SEPT5
GO:0031629	BP	synaptic vesicle fusion to presynaptic active zone membrane	│ │ │ ├─ synaptic vesicle fusion to presynaptic active zone membrane	GO:0016079			CPLX2
GO:0031630	BP	regulation of synaptic vesicle fusion to presynaptic active zone membrane	│ │ │ │ └─ regulation of synaptic vesicle fusion to presynaptic active zone membrane	GO:0031629			CPLX2
GO:0016082	BP	synaptic vesicle priming	│ │ │ └─ synaptic vesicle priming	GO:0016079	0.00745617	0.0135965	SV2A | CADPS2 | RPH3A
GO:0010807	BP	regulation of synaptic vesicle priming	│ │ │ └─ regulation of synaptic vesicle priming	GO:0016082
GO:0098700	BP	synaptic vesicle neurotransmitter loading	│ │ ├─ synaptic vesicle neurotransmitter loading	GO:0099504
GO:0099162	BP	regulation of synaptic vesicle neurotransmitter loading	│ │ │ └─ regulation of synaptic vesicle neurotransmitter loading	GO:0098700
GO:0099180	BP	zinc ion import into synaptic vesicle	│ │ ├─ zinc ion import into synaptic vesicle	GO:0099504			TMEM163
GO:0097401	BP	synaptic vesicle proton loading	│ │ ├─ synaptic vesicle proton loading	GO:0099504			ATP6V1F | ATP6V0A1
GO:0048488	BP	synaptic vesicle endocytosis	│ │ └─ synaptic vesicle endocytosis	GO:0099504			SCAMP5 | DGKQ
GO:1900242	BP	regulation of synaptic vesicle endocytosis	│ │ ├─ regulation of synaptic vesicle endocytosis	GO:0048488			SCAMP5 | DGKQ
GO:0016185	BP	synaptic vesicle budding from presynaptic endocytic zone membrane	│ │ ├─ synaptic vesicle budding from presynaptic endocytic zone membrane	GO:0048488
GO:0098694	BP	regulation of synaptic vesicle budding from presynaptic endocytic zone membrane	│ │ │ └─ regulation of synaptic vesicle budding from presynaptic endocytic zone membrane	GO:0016185
GO:0016191	BP	synaptic vesicle uncoating	│ │ └─ synaptic vesicle uncoating	GO:0048488
GO:0099525	BP	presynaptic dense core vesicle exocytosis	│ ├─ presynaptic dense core vesicle exocytosis	SYNGO:presynprocess
GO:0099161	BP	regulation of presynaptic dense core vesicle exocytosis	│ │ └─ regulation of presynaptic dense core vesicle exocytosis	GO:0099525
GO:0001504	BP	neurotransmitter uptake	│ ├─ neurotransmitter uptake	SYNGO:presynprocess			SLC6A9
GO:0098810	BP	neurotransmitter reuptake	│ ├─ neurotransmitter reuptake	SYNGO:presynprocess
GO:0051580	BP	regulation of neurotransmitter uptake	│ │ └─ regulation of neurotransmitter uptake	GO:0098810
SYNGO:presyn_chaperoneProteinFolding	BP	presynaptic chaperone-mediated protein folding	│ └─ presynaptic chaperone-mediated protein folding	SYNGO:presynprocess
SYNGO:postsynprocess	BP	process in the postsynapse	├─ process in the postsynapse	SYNGO:synprocess	0.0555991	0.0615561	CALB1 | GRIN1 | CHRNA4 | GRIK1 | KCNA2 | HOMER1 | NPTX1 | CAMK2A | ARC
GO:0099566	BP	regulation of postsynaptic cytosolic calcium levels	│ ├─ regulation of postsynaptic cytosolic calcium levels	SYNGO:postsynprocess			CALB1
GO:1905059	BP	ATPase-coupled calcium ion transmembrane transporter activity involved in regulation of postsynaptic cytosolic calcium levels	│ │ ├─ ATPase-coupled calcium ion transmembrane transporter activity involved in regulation of postsynaptic cytosolic calcium levels	GO:0099566
GO:0099567	BP	calcium ion binding involved in regulation of postsynaptic cytosolic calcium levels	│ │ ├─ calcium ion binding involved in regulation of postsynaptic cytosolic calcium levels	GO:0099566			CALB1
GO:1905060	BP	calcium:cation antiporter activity involved in regulation of postsynaptic cytosolic calcium ion levels	│ │ ├─ calcium:cation antiporter activity involved in regulation of postsynaptic cytosolic calcium ion levels	GO:0099566
GO:0098695	BP	inositol 1,4,5-trisphosphate receptor activity involved in regulation of postsynaptic cytosolic calcium levels	│ │ ├─ inositol 1,4,5-trisphosphate receptor activity involved in regulation of postsynaptic cytosolic calcium levels	GO:0099566
GO:0099583	BP	neurotransmitter receptor activity involved in regulation of postsynaptic cytosolic calcium levels	│ │ └─ neurotransmitter receptor activity involved in regulation of postsynaptic cytosolic calcium levels	GO:0099566
GO:0098872	BP	G-protein coupled neurotransmitter receptor activity involved in regulation of postsynaptic cytosolic calcium levels	│ │ └─ G-protein coupled neurotransmitter receptor activity involved in regulation of postsynaptic cytosolic calcium levels	GO:0099583
GO:0060078	BP	regulation of postsynaptic membrane potential	│ ├─ regulation of postsynaptic membrane potential	SYNGO:postsynprocess	0.0625686	0.0668836	GRIN1 | CHRNA4 | GRIK1 | KCNA2
GO:0099529	BP	neurotransmitter receptor activity involved in regulation of postsynaptic membrane potential	│ │ ├─ neurotransmitter receptor activity involved in regulation of postsynaptic membrane potential	GO:0060078
GO:0099579	BP	G-protein coupled neurotransmitter receptor activity involved in regulation of postsynaptic membrane potential	│ │ │ └─ G-protein coupled neurotransmitter receptor activity involved in regulation of postsynaptic membrane potential	GO:0099529
GO:1904315	BP	transmitter-gated ion channel activity involved in regulation of postsynaptic membrane potential	│ │ ├─ transmitter-gated ion channel activity involved in regulation of postsynaptic membrane potential	GO:0060078	0.115318	0.119162	GRIN1 | CHRNA4 | GRIK1
GO:1905030	BP	voltage-gated ion channel activity involved in regulation of postsynaptic membrane potential	│ │ └─ voltage-gated ion channel activity involved in regulation of postsynaptic membrane potential	GO:0060078			KCNA2
GO:0098962	BP	regulation of postsynaptic neurotransmitter receptor activity	│ ├─ regulation of postsynaptic neurotransmitter receptor activity	SYNGO:postsynprocess			HOMER1 | NPTX1
GO:0099072	BP	regulation of postsynaptic membrane neurotransmitter receptor levels	│ ├─ regulation of postsynaptic membrane neurotransmitter receptor levels	SYNGO:postsynprocess	0.505422	0.505422	NPTX1 | CAMK2A | ARC
GO:0099645	BP	neurotransmitter receptor localization to postsynaptic specialization membrane	│ │ ├─ neurotransmitter receptor localization to postsynaptic specialization membrane	GO:0099072			NPTX1 | CAMK2A
GO:0098696	BP	regulation of neurotransmitter receptor localization to postsynaptic specialization membrane	│ │ │ └─ regulation of neurotransmitter receptor localization to postsynaptic specialization membrane	GO:0099645			CAMK2A
GO:0098967	BP	exocytic insertion of neurotransmitter receptor to postsynaptic membrane	│ │ ├─ exocytic insertion of neurotransmitter receptor to postsynaptic membrane	GO:0099072
GO:0099145	BP	regulation of exocytic insertion of neurotransmitter receptor to postsynaptic membrane	│ │ │ └─ regulation of exocytic insertion of neurotransmitter receptor to postsynaptic membrane	GO:0098967
GO:0098970	BP	postsynaptic neurotransmitter receptor diffusion trapping	│ │ ├─ postsynaptic neurotransmitter receptor diffusion trapping	GO:0099072
GO:0150054	BP	regulation of postsynaptic neurotransmitter receptor diffusion trapping	│ │ │ └─ regulation of postsynaptic neurotransmitter receptor diffusion trapping	GO:0098970
GO:0098884	BP	postsynaptic neurotransmitter receptor endocytosis	│ │ └─ postsynaptic neurotransmitter receptor endocytosis	GO:0099072			ARC
GO:0099149	BP	regulation of postsynaptic neurotransmitter receptor endocytosis	│ │ └─ regulation of postsynaptic neurotransmitter receptor endocytosis	GO:0098884			ARC
GO:0150038	BP	postsynaptic dense core vesicle exocytosis	│ └─ postsynaptic dense core vesicle exocytosis	SYNGO:postsynprocess
GO:0150044	BP	regulation of postsynaptic dense core vesicle exocytosis	│ └─ regulation of postsynaptic dense core vesicle exocytosis	GO:0150038
GO:0099536	BP	synaptic signaling	├─ synaptic signaling	SYNGO:synprocess	2.24204e-05		PTPRD | TENM2 | TENM3 | FARP1 | PLAT | BDNF | ARC | PCDH8 | L1CAM | NCAM1 | PTPRS | NCAN | CNTNAP4 | CHRNA4 | GRM8 | DCC
GO:0099537	BP	trans-synaptic signaling	│ ├─ trans-synaptic signaling	GO:0099536	1.95623e-05	0.000101072	PTPRD | TENM2 | TENM3 | FARP1 | PLAT | BDNF | ARC | PCDH8 | L1CAM | NCAM1 | PTPRS | NCAN | CNTNAP4 | CHRNA4 | GRM8 | DCC
GO:0099541	BP	trans-synaptic signaling by lipid	│ │ ├─ trans-synaptic signaling by lipid	GO:0099537
GO:0099542	BP	trans-synaptic signaling by endocannabinoid	│ │ │ └─ trans-synaptic signaling by endocannabinoid	GO:0099541
GO:0098921	BP	retrograde trans-synaptic signaling by endocannabinoid	│ │ │ ├─ retrograde trans-synaptic signaling by endocannabinoid	GO:0099542
GO:0099178	BP	regulation of retrograde trans-synaptic signaling by endocanabinoid	│ │ │ │ └─ regulation of retrograde trans-synaptic signaling by endocanabinoid	GO:0098921
GO:0099553	BP	trans-synaptic signaling by endocannabinoid, modulating synaptic transmission	│ │ │ └─ trans-synaptic signaling by endocannabinoid, modulating synaptic transmission	GO:0099542
GO:0150036	BP	regulation of trans-synaptic signaling by endocannabinoid, modulating synaptic transmission	│ │ │ └─ regulation of trans-synaptic signaling by endocannabinoid, modulating synaptic transmission	GO:0099553
GO:0099540	BP	trans-synaptic signaling by neuropeptide	│ │ ├─ trans-synaptic signaling by neuropeptide	GO:0099537
GO:0099543	BP	trans-synaptic signaling by soluble gas	│ │ ├─ trans-synaptic signaling by soluble gas	GO:0099537
GO:0099548	BP	trans-synaptic signaling by nitric oxide	│ │ │ └─ trans-synaptic signaling by nitric oxide	GO:0099543
GO:0099555	BP	trans-synaptic signaling by nitric oxide, modulating synaptic transmission	│ │ │ └─ trans-synaptic signaling by nitric oxide, modulating synaptic transmission	GO:0099548
GO:0098925	BP	retrograde trans-synaptic signaling by nitric oxide, modulating synaptic transmission	│ │ │ └─ retrograde trans-synaptic signaling by nitric oxide, modulating synaptic transmission	GO:0099555
GO:0099545	BP	trans-synaptic signaling by trans-synaptic complex	│ │ ├─ trans-synaptic signaling by trans-synaptic complex	GO:0099537	0.000623988	0.00214929	PTPRD | TENM2 | TENM3 | FARP1
GO:0098942	BP	retrograde trans-synaptic signaling by trans-synaptic protein complex	│ │ │ ├─ retrograde trans-synaptic signaling by trans-synaptic protein complex	GO:0099545	0.00179276	0.00453574	TENM2 | TENM3 | FARP1
GO:0099557	BP	trans-synaptic signaling by trans-synaptic complex, modulating synaptic transmission	│ │ │ └─ trans-synaptic signaling by trans-synaptic complex, modulating synaptic transmission	GO:0099545
GO:0099157	BP	trans-synaptic signalling via exosome	│ │ ├─ trans-synaptic signalling via exosome	GO:0099537
GO:0099183	BP	trans-synaptic signaling by BDNF, modulating synaptic transmission	│ │ ├─ trans-synaptic signaling by BDNF, modulating synaptic transmission	GO:0099537			PLAT | BDNF
GO:0150035	BP	regulation of trans-synaptic signaling by BDNF, modulating synaptic transmission	│ │ │ └─ regulation of trans-synaptic signaling by BDNF, modulating synaptic transmission	GO:0099183
GO:0007268	BP	chemical synaptic transmission	│ │ └─ chemical synaptic transmission	GO:0099537	0.00190208	0.00453574	ARC | PCDH8 | L1CAM | NCAM1 | PTPRD | PTPRS | NCAN | CNTNAP4 | CHRNA4 | GRM8 | DCC
GO:0050804	BP	modulation of chemical synaptic transmission	│ │ ├─ modulation of chemical synaptic transmission	GO:0007268	0.00211454	0.0046822	ARC | PCDH8 | L1CAM | NCAM1 | PTPRD | PTPRS | NCAN | CNTNAP4
GO:0099531	BP	presynaptic process involved in chemical synaptic transmission	│ │ ├─ presynaptic process involved in chemical synaptic transmission	GO:0007268			CHRNA4 | GRM8
GO:0099171	BP	presynaptic modulation of chemical synaptic transmission	│ │ │ └─ presynaptic modulation of chemical synaptic transmission	GO:0099531			CHRNA4 | GRM8
GO:0099565	BP	postsynaptic process involved in chemical synaptic transmission	│ │ └─ postsynaptic process involved in chemical synaptic transmission	GO:0007268			DCC
GO:0099170	BP	postsynaptic modulation of chemical synaptic transmission	│ │ └─ postsynaptic modulation of chemical synaptic transmission	GO:0099565			DCC
GO:0099538	BP	synaptic signaling via neuropeptide	│ ├─ synaptic signaling via neuropeptide	GO:0099536
GO:0099163	BP	synaptic signaling by nitric oxide	│ └─ synaptic signaling by nitric oxide	GO:0099536
GO:0150045	BP	regulation of synaptic signaling by nitric oxide	│ └─ regulation of synaptic signaling by nitric oxide	GO:0099163
GO:0050808	BP	synapse organization	├─ synapse organization	SYNGO:synprocess	4.33463e-05	0.000167967	PTPRS | HIP1R | AGRN | CNTNAP4 | SPARC | APOE | RIMBP2 | PCDH17 | NCAM1 | PTPRD | PCDH8 | FARP1 | APP | CLSTN3 | PSD | NPTX1 | CLSTN1 | GRN | SORT1 | TENM2 | TENM3
GO:0099172	BP	presynapse organization	│ ├─ presynapse organization	GO:0050808
GO:0099174	BP	regulation of presynapse organization	│ │ └─ regulation of presynapse organization	GO:0099172
GO:0099173	BP	postsynapse organization	│ ├─ postsynapse organization	GO:0050808			HIP1R
GO:0099175	BP	regulation of postsynapse organization	│ │ ├─ regulation of postsynapse organization	GO:0099173
GO:0099084	BP	postsynaptic specialization organization	│ │ └─ postsynaptic specialization organization	GO:0099173
GO:0099563	BP	modification of synaptic structure	│ ├─ modification of synaptic structure	GO:0050808
GO:0099010	BP	modification of postsynaptic structure	│ │ └─ modification of postsynaptic structure	GO:0099563
GO:0099159	BP	regulation of modification of postsynaptic structure	│ │ ├─ regulation of modification of postsynaptic structure	GO:0099010
GO:0098885	BP	modification of postsynaptic actin cytoskeleton	│ │ └─ modification of postsynaptic actin cytoskeleton	GO:0099010
GO:1905274	BP	regulation of modification of postsynaptic actin cytoskeleton	│ │ └─ regulation of modification of postsynaptic actin cytoskeleton	GO:0098885
GO:0050807	BP	regulation of synapse organization	│ ├─ regulation of synapse organization	GO:0050808	0.00992873	0.0159831	AGRN | CNTNAP4 | SPARC | APOE
GO:0098918	BP	structural constituent of synapse	│ ├─ structural constituent of synapse	GO:0050808			RIMBP2
GO:0099181	BP	structural constituent of presynapse	│ │ ├─ structural constituent of presynapse	GO:0098918			RIMBP2
GO:0098882	BP	structural constituent of active zone	│ │ │ ├─ structural constituent of active zone	GO:0099181			RIMBP2
GO:0098699	BP	structural constituent of presynaptic actin cytoskeleton	│ │ │ └─ structural constituent of presynaptic actin cytoskeleton	GO:0099181
GO:0099186	BP	structural constituent of postsynapse	│ │ └─ structural constituent of postsynapse	GO:0098918
GO:0098973	BP	structural constituent of postsynaptic actin cytoskeleton	│ │ ├─ structural constituent of postsynaptic actin cytoskeleton	GO:0099186
GO:0099184	BP	structural constituent of postsynaptic intermediate filament cytoskeleton	│ │ ├─ structural constituent of postsynaptic intermediate filament cytoskeleton	GO:0099186
GO:0098879	BP	structural constituent of postsynaptic specialization	│ │ ├─ structural constituent of postsynaptic specialization	GO:0099186
GO:0098919	BP	structural constituent of postsynaptic density	│ │ └─ structural constituent of postsynaptic density	GO:0099186
GO:0150043	BP	structural constituent of synapse-associated extracellular matrix	│ ├─ structural constituent of synapse-associated extracellular matrix	GO:0050808
GO:0099560	BP	synapse adhesion between pre- and post-synapse	│ ├─ synapse adhesion between pre- and post-synapse	GO:0050808	0.00435067	0.00842941	PCDH17 | NCAM1 | PTPRS | PTPRD | PCDH8
GO:0099179	BP	regulation of synaptic membrane adhesion	│ │ └─ regulation of synaptic membrane adhesion	GO:0099560			PCDH8
GO:0008039	BP	synaptic target recognition	│ ├─ synaptic target recognition	GO:0050808
GO:0007416	BP	synapse assembly	│ ├─ synapse assembly	GO:0050808	0.0103117	0.0159831	PTPRD | PTPRS | FARP1 | APP | CLSTN3 | PSD | NPTX1
GO:0099054	BP	presynapse assembly	│ │ ├─ presynapse assembly	GO:0007416			PTPRD | PTPRS
GO:0051963	BP	regulation of synapse assembly	│ │ ├─ regulation of synapse assembly	GO:0007416	0.0373239	0.0445015	FARP1 | APP | CLSTN3 | PSD
GO:1905606	BP	regulation of presynapse assembly	│ │ │ ├─ regulation of presynapse assembly	GO:0051963	0.0526939	0.0605004	FARP1 | APP | CLSTN3
GO:0150052	BP	regulation of postsynapse assembly	│ │ │ └─ regulation of postsynapse assembly	GO:0051963			PSD
GO:0098698	BP	postsynaptic specialization assembly	│ │ ├─ postsynaptic specialization assembly	GO:0007416	0.0609002		NPTX1 | PTPRD | PTPRS
GO:0099150	BP	regulation of postsynaptic specialization assembly	│ │ │ ├─ regulation of postsynaptic specialization assembly	GO:0098698
GO:0097107	BP	postsynaptic density assembly	│ │ │ └─ postsynaptic density assembly	GO:0098698	0.0182913	0.0257742	NPTX1 | PTPRD | PTPRS
GO:0099151	BP	regulation of postsynaptic density assembly	│ │ │ └─ regulation of postsynaptic density assembly	GO:0097107			PTPRD | PTPRS
GO:0097104	BP	postsynaptic membrane assembly	│ │ └─ postsynaptic membrane assembly	GO:0007416
GO:0098883	BP	synapse disassembly	│ ├─ synapse disassembly	GO:0050808
GO:1905806	BP	regulation of synapse disassembly	│ │ └─ regulation of synapse disassembly	GO:0098883
GO:0060074	BP	synapse maturation	│ ├─ synapse maturation	GO:0050808			CLSTN1
GO:0090128	BP	regulation of synapse maturation	│ │ └─ regulation of synapse maturation	GO:0060074			CLSTN1
GO:0099558	BP	maintenance of synapse structure	│ ├─ maintenance of synapse structure	GO:0050808	0.00153058	0.00431346	GRN | SORT1 | TENM2 | TENM3
GO:0099559	BP	maintenance of alignment of postsynaptic density and presynaptic active zone	│ │ ├─ maintenance of alignment of postsynaptic density and presynaptic active zone	GO:0099558			TENM2 | TENM3
GO:0098880	BP	maintenance of postsynaptic specialization structure	│ │ └─ maintenance of postsynaptic specialization structure	GO:0099558
GO:0099562	BP	maintenance of postsynaptic density structure	│ │ └─ maintenance of postsynaptic density structure	GO:0098880
GO:0099187	BP	presynaptic cytoskeleton organization	│ ├─ presynaptic cytoskeleton organization	GO:0050808
GO:0099140	BP	presynaptic actin cytoskeleton organization	│ │ └─ presynaptic actin cytoskeleton organization	GO:0099187
GO:0099188	BP	postsynaptic cytoskeleton organization	│ └─ postsynaptic cytoskeleton organization	GO:0050808	0.0258112	0.034789	FARP1 | TENM2 | TENM3
GO:0098974	BP	postsynaptic actin cytoskeleton organization	│ ├─ postsynaptic actin cytoskeleton organization	GO:0099188			FARP1
GO:0099190	BP	postsynaptic spectrin-associated cytoskeleton organization	│ └─ postsynaptic spectrin-associated cytoskeleton organization	GO:0099188			TENM2 | TENM3
SYNGO:metabolism	BP	metabolism	├─ metabolism	SYNGO:synprocess	3.4037e-17	2.63786e-16	SLC6A8 | KLHL17 | RPL9 | RPL10 | RPL11 | RPL13A | RPL14 | RPL17 | RPL26 | RPL24 | RPL27A | RPL32 | RPL34 | RPL35 | RPL37A | RPL4 | RPL5 | RPLP0 | UBA52 | RPS11 | RPS14 | RPS15A | RPS16 | RPS27A | RPS28 | RPS5
SYNGO:presyn_ATPmetabolic	BP	ATP metabolic process in the presynapse	│ ├─ ATP metabolic process in the presynapse	SYNGO:metabolism
SYNGO:presyn_regulationATPmetabolic	BP	regulation of ATP metabolic process in the presynapse	│ │ └─ regulation of ATP metabolic process in the presynapse	SYNGO:presyn_ATPmetabolic
SYNGO:postsyn_ATPmetabolic	BP	ATP metabolic process in the postsynapse	│ ├─ ATP metabolic process in the postsynapse	SYNGO:metabolism
GO:0099546	BP	protein catabolic process, modulating synaptic transmission	│ ├─ protein catabolic process, modulating synaptic transmission	SYNGO:metabolism
GO:0099574	BP	regulation of protein catabolic process at synapse, modulating synaptic transmission	│ ├─ regulation of protein catabolic process at synapse, modulating synaptic transmission	SYNGO:metabolism
GO:0099576	BP	regulation of protein catabolic process at postsynapse, modulating synaptic transmission	│ │ ├─ regulation of protein catabolic process at postsynapse, modulating synaptic transmission	GO:0099574
GO:0099575	BP	regulation of protein catabolic process at presynapse, modulating synaptic transmission	│ │ └─ regulation of protein catabolic process at presynapse, modulating synaptic transmission	GO:0099574
GO:0099547	BP	regulation of translation at synapse, modulating synaptic transmission	│ ├─ regulation of translation at synapse, modulating synaptic transmission	SYNGO:metabolism
GO:0099578	BP	regulation of translation at postsynapse, modulating synaptic transmission	│ │ ├─ regulation of translation at postsynapse, modulating synaptic transmission	GO:0099547
GO:0099577	BP	regulation of translation at presynapse, modulating synaptic transmission	│ │ └─ regulation of translation at presynapse, modulating synaptic transmission	GO:0099547
GO:0042135	BP	neurotransmitter catabolic process	│ ├─ neurotransmitter catabolic process	SYNGO:metabolism
SYNGO:catabolic_synapse	BP	protein catabolic process at synapse	│ ├─ protein catabolic process at synapse	SYNGO:metabolism			KLHL17
SYNGO:catabolic_presynapse	BP	protein catabolic process at presynapse	│ │ ├─ protein catabolic process at presynapse	SYNGO:catabolic_synapse
SYNGO:catabolic_presynapse_regulation	BP	regulation of protein catabolic process at presynapse	│ │ │ └─ regulation of protein catabolic process at presynapse	SYNGO:catabolic_presynapse
SYNGO:catabolic_postsynapse	BP	protein catabolic process at postsynapse	│ │ └─ protein catabolic process at postsynapse	SYNGO:catabolic_synapse			KLHL17
SYNGO:catabolic_postsynapse_regulation	BP	regulation of protein catabolic process at postsynapse	│ │ └─ regulation of protein catabolic process at postsynapse	SYNGO:catabolic_postsynapse			KLHL17
GO:0042136	BP	neurotransmitter biosynthetic process	│ ├─ neurotransmitter biosynthetic process	SYNGO:metabolism
SYNGO:translation_synapse	BP	protein translation at synapse	│ └─ protein translation at synapse	SYNGO:metabolism	1.85403e-19		RPL9 | RPL10 | RPL11 | RPL13A | RPL14 | RPL17 | RPL26 | RPL24 | RPL27A | RPL32 | RPL34 | RPL35 | RPL37A | RPL4 | RPL5 | RPLP0 | UBA52 | RPS11 | RPS14 | RPS15A | RPS16 | RPS27A | RPS28 | RPS5
SYNGO:translation_presynapse	BP	protein translation at presynapse	│ ├─ protein translation at presynapse	SYNGO:translation_synapse	3.31937e-20	5.14503e-19	RPL9 | RPL10 | RPL11 | RPL13A | RPL14 | RPL17 | RPL26 | RPL24 | RPL27A | RPL32 | RPL34 | RPL35 | RPL37A | RPL4 | RPL5 | RPLP0 | UBA52 | RPS11 | RPS14 | RPS15A | RPS16 | RPS27A | RPS28 | RPS5
SYNGO:translation_postsynapse	BP	protein translation at postsynapse	│ └─ protein translation at postsynapse	SYNGO:translation_synapse	1.85403e-19	1.91583e-18	RPL9 | RPL10 | RPL11 | RPL13A | RPL14 | RPL17 | RPL26 | RPL24 | RPL27A | RPL32 | RPL34 | RPL35 | RPL37A | RPL4 | RPL5 | RPLP0 | UBA52 | RPS11 | RPS14 | RPS15A | RPS16 | RPS27A | RPS28 | RPS5
SYNGO:translation_postsynapse_regulation	BP	regulation of protein translation at postsynapse	│ └─ regulation of protein translation at postsynapse	SYNGO:translation_postsynapse
SYNGO:transport	BP	transport	└─ transport	SYNGO:synprocess	0.0161959	0.0239082	DPYSL2 | MADD | CLSTN1 | GRASP
GO:0008088	BP	axo-dendritic transport	├─ axo-dendritic transport	SYNGO:transport
GO:0098930	BP	axonal transport	│ ├─ axonal transport	GO:0008088
GO:0008089	BP	anterograde axonal transport	│ │ ├─ anterograde axonal transport	GO:0098930
GO:0099641	BP	anterograde axonal protein transport	│ │ │ └─ anterograde axonal protein transport	GO:0008089
GO:0099088	BP	axonal transport of messenger ribonucleoprotein complex	│ │ └─ axonal transport of messenger ribonucleoprotein complex	GO:0098930
GO:0098935	BP	dendritic transport	│ └─ dendritic transport	GO:0008088
GO:0098937	BP	anterograde dendritic transport	│ ├─ anterograde dendritic transport	GO:0098935
GO:0098971	BP	anterograde dendritic transport of neurotransmitter receptor complex	│ │ └─ anterograde dendritic transport of neurotransmitter receptor complex	GO:0098937
GO:0098939	BP	dendritic transport of mitochondrion	│ ├─ dendritic transport of mitochondrion	GO:0098935
GO:0098961	BP	dendritic transport of ribonucleoprotein complex	│ └─ dendritic transport of ribonucleoprotein complex	GO:0098935
GO:0098963	BP	dendritic transport of messenger ribonucleoprotein complex	│ └─ dendritic transport of messenger ribonucleoprotein complex	GO:0098961
GO:0098964	BP	anterograde dendritic transport of messenger ribonucleoprotein complex	│ └─ anterograde dendritic transport of messenger ribonucleoprotein complex	GO:0098963
GO:0099514	BP	synaptic vesicle cytoskeletal transport	├─ synaptic vesicle cytoskeletal transport	SYNGO:transport			MADD
GO:0099517	BP	synaptic vesicle transport along microtubule	│ └─ synaptic vesicle transport along microtubule	GO:0099514			MADD
GO:0048490	BP	anterograde synaptic vesicle transport	│ └─ anterograde synaptic vesicle transport	GO:0099517			MADD
GO:1903742	BP	regulation of anterograde synaptic vesicle transport	│ └─ regulation of anterograde synaptic vesicle transport	GO:0048490
GO:0099090	BP	synaptic vesicle recycling via endosome	├─ synaptic vesicle recycling via endosome	SYNGO:transport
GO:0099158	BP	regulation of recycling endosome localization within postsynapse	│ └─ regulation of recycling endosome localization within postsynapse	GO:0099090
GO:0099089	BP	establishment of endoplasmic reticulum localization to postsynapse	├─ establishment of endoplasmic reticulum localization to postsynapse	SYNGO:transport
GO:0099637	BP	neurotransmitter receptor transport	└─ neurotransmitter receptor transport	SYNGO:transport			CLSTN1 | GRASP
GO:0098877	BP	neurotransmitter receptor transport to plasma membrane	├─ neurotransmitter receptor transport to plasma membrane	GO:0099637			CLSTN1 | GRASP
GO:0098969	BP	neurotransmitter receptor transport to postsynaptic membrane	│ ├─ neurotransmitter receptor transport to postsynaptic membrane	GO:0098877			CLSTN1
GO:0099639	BP	neurotransmitter receptor transport, endosome to plasma membrane	│ └─ neurotransmitter receptor transport, endosome to plasma membrane	GO:0098877			GRASP
GO:0098887	BP	neurotransmitter receptor transport, endosome to postsynaptic membrane	│ └─ neurotransmitter receptor transport, endosome to postsynaptic membrane	GO:0099639			GRASP
GO:0099152	BP	regulation of neurotransmitter receptor transport, endosome to postsynaptic membrane	│ └─ regulation of neurotransmitter receptor transport, endosome to postsynaptic membrane	GO:0098887			GRASP
GO:0098943	BP	neurotransmitter receptor transport, postsynaptic endosome to lysosome	└─ neurotransmitter receptor transport, postsynaptic endosome to lysosome	GO:0099637
